# Supplementary material for: Metabolic Plasticity Is an Essential Requirement of Acquired Tyrosine Kinase Inhibitor Resistance in Chronic Myeloid Leukemia
Source: Cancers (Basel). 2020 Nov 19;12(11):3443. doi: 10.3390/cancers12113443 (PMC7699488; doi:10.3390/cancers12113443)
Supplement: Supplementary file 1 [file cancers-12-03443-s001.zip › cancers-980787_Supplementary_MS_SILAC_file.xlsx]

## Sheet: Rawdata
Majority protein IDs	Gene names	log2 H/L Normoxia R1	log2 H/L Normoxia R2	mean log2 H/L Normoxia	SD log2 H/L Normoxia	Peptides	Razor + unique peptides	Unique peptides	Sequence coverage [%]	Unique + razor sequence coverage [%]	Unique sequence coverage [%]	Mol. weight [kDa]	Q-value	Score	Intensity	Intensity L	Intensity H	Peptides Hypoxia R1	Peptides Hypoxia R2	Peptides Normoxia R1	Peptides Normoxia R2	Protein IDs	Protein names
P62328	TMSB4X		1.06661	1.06661	#DIV/0!	5	5	5	77.3	77.3	77.3	5.0526	0	24.298	1588000000	404630000	1183400000	0	5	0	5	P62328	Thymosin beta-4;Hematopoietic system regulatory peptide
O60361	NME2P1	0.260725	0.93655	0.598638	0.47788	12	1	1	66.4	7.3	7.3	15.529	0.0035983	1.8143	1128400000	382190000	746190000	8	9	9	10	O60361	Putative nucleoside diphosphate kinase
P61158	ACTR3	1.52299	1.68268	1.60284	0.112918	21	21	21	63.9	63.9	63.9	47.371	0	323.31	36275000000	7967500000	28308000000	12	16	15	10	P61158;Q9P1U1;Q9C0K3	Actin-related protein 3
Q6UY14	ADAMTSL4		0.90754	0.90754	#DIV/0!	6	6	6	6.8	6.8	6.8	116.54	0	3.5793	501280000	167500000	333780000	2	5	1	1	Q6UY14	ADAMTS-like protein 4
E9PAV3;Q13765	NACA	0.662091	0.52593	0.594011	0.0962804	7	7	7	2.7	2.7	2.7	205.42	0	184.5	33178000000	10789000000	22389000000	3	7	7	7	E9PAV3;Q13765;Q9BZK3	Nascent polypeptide-associated complex subunit alpha, muscle-specific form;Nascent polypeptide-associated complex subunit alpha
P56378	MP68	0.717682	0.611074	0.664378	0.0753832	3	3	3	63.8	63.8	63.8	6.662	0	6.458	5439600000	1672700000	3766800000	1	3	2	3	P56378	6.8 kDa mitochondrial proteolipid
Q05655	PRKCD	7.36433	3.9274	5.64587	2.43028	35	35	34	62.3	62.3	60.8	77.504	0	323.31	7898300000	783510000	7114700000	15	29	18	12	Q05655	Protein kinase C delta type;Protein kinase C delta type regulatory subunit;Protein kinase C delta type catalytic subunit
P21291	CSRP1	-0.340265	-0.361943	-0.351104	0.0153287	8	8	8	59.6	59.6	59.6	20.567	0	229.59	1772300000	806100000	966160000	1	7	4	8	P21291	Cysteine and glycine-rich protein 1
P23327	HRC	2.76372		2.76372	#DIV/0!	9	9	9	23.6	23.6	23.6	80.243	0	89.892	450960000	3933900	447030000	6	9	5	4	P23327	Sarcoplasmic reticulum histidine-rich calcium-binding protein
Q07065	CKAP4	6.55713	4.07723	5.31718	1.75355	30	30	30	61.6	61.6	61.6	66.022	0	323.31	10790000000	1816200000	8973500000	14	25	7	15	Q07065	Cytoskeleton-associated protein 4
Q96SL4	GPX7	2.90154	3.06532	2.98343	0.11581	10	10	10	66.8	66.8	66.8	20.996	0	87.731	2941400000	401470000	2539900000	4	7	7	6	Q96SL4	Glutathione peroxidase 7
Q9BRP8	WIBG	0.585829	0.690116	0.637973	0.073742	8	8	8	62.7	62.7	62.7	22.655	0	160.71	1073300000	339720000	733540000	0	5	5	3	Q9BRP8	Partner of Y14 and mago
Q8NG11	TSPAN14	-0.836505		-0.836505	#DIV/0!	3	3	3	14.1	14.1	14.1	30.69	0	16.656	200110000	79335000	120770000	0	1	3	0	Q8NG11	Tetraspanin-14
P63272	SUPT4H1	0.33051	0.461247	0.395878	0.092445	5	5	5	50.4	50.4	50.4	13.193	0	12.751	2068900000	869620000	1199300000	0	2	4	2	P63272	Transcription elongation factor SPT4
P61769	B2M	2.51861	2.63966	2.57913	0.0855953	6	6	6	68.1	68.1	68.1	13.714	0	109.95	22417000000	2176700000	20240000000	2	5	4	5	P61769	Beta-2-microglobulin;Beta-2-microglobulin form pI 5.3
P13498	CYBA	4.22665		4.22665	#DIV/0!	4	4	4	32.3	32.3	32.3	21.012	0	12.009	702440000	32674000	669770000	4	3	4	2	P13498	Cytochrome b-245 light chain
P07108	DBI	2.38618	2.39537	2.39077	0.00649831	12	12	12	83.9	83.9	83.9	10.044	0	87.845	22909000000	4159700000	18750000000	3	9	10	9	P07108	Acyl-CoA-binding protein
P49915	GMPS	0.269151	0.339804	0.304478	0.0499592	38	38	38	71.7	71.7	71.7	76.715	0	323.31	24751000000	9885500000	14866000000	21	31	21	21	P49915	GMP synthase [glutamine-hydrolyzing]
Q14012	CAMK1	3.6208	0.262086	1.94144	2.37497	8	5	5	27.8	20.5	20.5	41.337	0	161.25	2492600000	273790000	2218800000	5	6	7	4	Q14012	Calcium/calmodulin-dependent protein kinase type 1
Q9C005	DPY30				#DIV/0!	2	2	2	11.1	11.1	11.1	11.25	0.0026424	1.9656	93675000	21572000	72103000	0	2	1	1	Q9C005	Protein dpy-30 homolog
Q01518	CAP1	3.62028	3.29786	3.45907	0.227985	52	52	51	80.4	80.4	80.4	51.901	0	323.31	192680000000	15735000000	176940000000	29	41	45	39	Q01518	Adenylyl cyclase-associated protein 1
Q9Y3L5	RAP2C	0.462545	0.897362	0.679954	0.307462	8	4	3	67.8	34.4	20.2	20.745	0	16.743	637290000	230350000	406940000	5	6	6	6	Q9Y3L5	Ras-related protein Rap-2c
Q15029	EFTUD2	-0.00811865	-0.0604011	-0.0342599	0.0369693	53	52	52	63.2	62.1	62.1	109.43	0	323.31	40527000000	21208000000	19319000000	43	42	33	42	Q15029	116 kDa U5 small nuclear ribonucleoprotein component
Q8WY22	BRI3BP	1.02141	1.38633	1.20387	0.258037	5	5	5	23.1	23.1	23.1	27.835	0	127.22	2403900000	672170000	1731800000	2	3	3	3	Q8WY22;REV__Q96PE2	BRI3-binding protein
O95298;E9PQ53	NDUFC2;NDUFC2-KCTD14	0.107931	-0.0346761	0.0366272	0.100838	8	8	8	38.7	38.7	38.7	14.187	0	10.838	3761200000	1545700000	2215500000	1	5	4	6	O95298;E9PQ53	NADH dehydrogenase [ubiquinone] 1 subunit C2;NADH dehydrogenase [ubiquinone] 1 subunit C2, isoform 2
P63208	SKP1	-0.134838	-0.0468541	-0.0908459	0.062214	13	13	13	81	81	81	18.658	0	129	5439100000	2567300000	2871900000	5	10	7	11	P63208	S-phase kinase-associated protein 1
P62877	RBX1	0.724142	0.61018	0.667161	0.0805833	3	3	3	25	25	25	12.274	0	36.548	2361200000	1043700000	1317400000	0	2	3	3	P62877	E3 ubiquitin-protein ligase RBX1;E3 ubiquitin-protein ligase RBX1, N-terminally processed
P46976	GYG1	1.92427	2.09233	2.0083	0.118836	16	16	16	30	30	30	39.383	0	173.86	3885700000	1197000000	2688700000	15	9	16	1	P46976	Glycogenin-1
Q03405	PLAUR				#DIV/0!	5	5	5	25.4	25.4	25.4	36.978	0	106.64	580410000	62467000	517950000	3	4	1	0	Q03405	Urokinase plasminogen activator surface receptor
P24158	PRTN3	4.83683	4.45707	4.64695	0.268531	5	5	5	24.2	24.2	24.2	27.807	0	268.94	3317700000	209490000	3108200000	2	5	4	2	P24158	Myeloblastin
P06702	S100A9	7.98775	9.25637	8.62206	0.89705	16	16	16	93.9	93.9	93.9	13.242	0	323.31	91554000000	1971600000	89583000000	10	16	12	11	P06702	Protein S100-A9
Q01130	SRSF2	0.284412	0.442132	0.363272	0.111525	7	7	5	29.9	29.9	26.2	25.476	0	94.981	7104700000	2627900000	4476800000	4	5	4	3	Q01130	Serine/arginine-rich splicing factor 2
Q9Y6H1;Q5T1J5	CHCHD2;CHCHD2P9				#DIV/0!	3	3	3	27.2	27.2	27.2	15.512	0	40.722	540880000	81652000	459220000	0	2	1	1	Q9Y6H1;Q5T1J5	Coiled-coil-helix-coiled-coil-helix domain-containing protein 2;Putative coiled-coil-helix-coiled-coil-helix domain-containing protein CHCHD2P9, mitochondrial
P05164	MPO	3.61008	4.06069	3.83538	0.318629	32	32	30	49.9	49.9	47.5	83.868	0	202.45	9854000000	543970000	9310000000	19	27	8	14	P05164	Myeloperoxidase;Myeloperoxidase;89 kDa myeloperoxidase;84 kDa myeloperoxidase;Myeloperoxidase light chain;Myeloperoxidase heavy chain
P56730	PRSS12				#DIV/0!	6	6	6	8.9	8.9	8.9	97.066	0	16.691	189960000	7379900	182580000	3	5	1	0	P56730	Neurotrypsin
P56556	NDUFA6	0.427285	0.461945	0.444615	0.0245083	7	7	7	47.7	47.7	47.7	15.136	0	102.05	5968000000	2377300000	3590700000	1	5	6	5	P56556	NADH dehydrogenase [ubiquinone] 1 alpha subcomplex subunit 6
P22307	SCP2	2.34483	2.42685	2.38584	0.0579969	20	20	20	32.5	32.5	32.5	58.993	0	106.75	19309000000	3352100000	15957000000	9	17	12	13	P22307	Non-specific lipid-transfer protein
Q9UM54	MYO6	4.1617	4.13174	4.14672	0.0211849	62	62	62	53.7	53.7	53.7	149.69	0	323.31	12267000000	904030000	11363000000	32	47	34	41	Q9UM54	Unconventional myosin-VI
Q05193	DNM1	3.21912	3.12135	3.17023	0.0691338	19	12	9	28.9	22	17.7	97.407	0	92.757	657370000	59876000	597500000	9	11	12	9	Q05193	Dynamin-1
Q8N8R5	C2orf69	-0.210951		-0.210951	#DIV/0!	5	5	5	18.4	18.4	18.4	43.448	0	8.3397	2284000000	1154200000	1129800000	4	3	1	2	Q8N8R5	UPF0565 protein C2orf69
P11233	RALA	0.370592	0.278859	0.324726	0.064865	8	2	2	47.6	14.1	14.1	23.567	0	89.192	3446700000	917450000	2529200000	5	8	7	7	P11233	Ras-related protein Ral-A
P61923	COPZ1	0.757697	0.916169	0.836933	0.112057	7	7	7	44.1	44.1	44.1	20.198	0	125.21	7830400000	2944700000	4885700000	5	6	7	7	P61923	Coatomer subunit zeta-1
Q5JRX3	PITRM1	-0.896758	-0.742476	-0.819617	0.109094	42	42	42	50.8	50.8	50.8	117.41	0	323.31	12395000000	6155200000	6240200000	32	29	18	26	Q5JRX3	Presequence protease, mitochondrial
Q99442	SEC62	1.14448	0.955855	1.05017	0.133378	7	7	7	19.3	19.3	19.3	45.861	0	32.1	985520000	185080000	800440000	3	7	2	1	Q99442	Translocation protein SEC62
O75832	PSMD10	0.594987	0.490749	0.542868	0.0737074	16	16	16	73	73	73	24.428	0	246.69	6950400000	2917200000	4033200000	1	9	6	14	O75832	26S proteasome non-ATPase regulatory subunit 10
Q9H444	CHMP4B	1.38218	2.37603	1.87911	0.702758	9	9	9	40.6	40.6	40.6	24.95	0	74.166	4037300000	984980000	3052400000	2	8	7	4	Q9H444;P59074;Q96CF2	Charged multivesicular body protein 4b
Q9Y3Z3	SAMHD1	1.4808	1.82795	1.65438	0.245472	23	23	23	51.3	51.3	51.3	72.2	0	92.364	2290900000	437420000	1853500000	11	18	7	3	Q9Y3Z3	Deoxynucleoside triphosphate triphosphohydrolase SAMHD1
O75817	POP7	0.0870914	0.37344	0.230266	0.202479	4	4	4	24.3	24.3	24.3	15.651	0	17.88	1002000000	236070000	765940000	1	3	2	2	O75817	Ribonuclease P protein subunit p20
O95166;Q9H0R8	GABARAP;GABARAPL1	1.53958	1.38513	1.46236	0.109213	4	3	3	31.6	25.6	25.6	13.918	0	27.745	1486800000	410680000	1076100000	1	2	3	4	O95166;Q9H0R8	Gamma-aminobutyric acid receptor-associated protein;Gamma-aminobutyric acid receptor-associated protein-like 1
P23141	CES1	5.28667	4.85672	5.0717	0.304021	47	47	47	81.5	81.5	81.5	62.52	0	323.31	359220000000	17453000000	341770000000	39	46	41	41	P23141;Q9UKY3	Liver carboxylesterase 1
Q8NHU6	TDRD7	0.627529		0.627529	#DIV/0!	7	7	7	7	7	7	123.58	0	7.8436	347420000	126140000	221290000	4	4	3	2	Q8NHU6	Tudor domain-containing protein 7
Q15042	RAB3GAP1	0.920238	1.07165	0.995944	0.107064	42	42	42	53.6	53.6	53.6	110.52	0	295.6	8251600000	3232400000	5019200000	28	26	26	24	Q15042	Rab3 GTPase-activating protein catalytic subunit
P55145	MANF	1.82255	2.09771	1.96013	0.194568	16	16	16	53.3	53.3	53.3	20.7	0	87.677	8853600000	1727600000	7126000000	5	13	11	11	P55145	Mesencephalic astrocyte-derived neurotrophic factor
P68032;P68133;P63267;P62736	ACTC1;ACTA1;ACTG2;ACTA2	0.930583	0.798853	0.864718	0.0931472	24	3	3	43.2	8.8	8.8	42.019	0	229.13	44670000000	10450000000	34220000000	15	23	21	19	P68032;P68133;P63267;P62736	Actin, alpha cardiac muscle 1;Actin, alpha skeletal muscle;Actin, gamma-enteric smooth muscle;Actin, aortic smooth muscle
Q9H2J4	PDCL3	0.903236	0.945866	0.924551	0.030144	9	9	9	49	49	49	27.614	0	36.703	1764600000	415540000	1349100000	2	6	5	5	Q9H2J4	Phosducin-like protein 3
A0MZ66	KIAA1598		2.31054	2.31054	#DIV/0!	12	12	12	18.9	18.9	18.9	71.639	0	18.709	687330000	94620000	592710000	2	8	2	5	A0MZ66	Shootin-1
P07203	GPX1	3.07865	2.85783	2.96824	0.156143	13	13	13	65.5	65.5	65.5	22.088	0	120.89	8965500000	988310000	7977200000	7	10	9	11	P07203	Glutathione peroxidase 1
Q9Y3E0	GOLT1B	1.22746	1.03051	1.12898	0.139265	2	2	2	17.4	17.4	17.4	15.425	0	8.8264	1887200000	513490000	1373700000	2	2	1	1	Q9Y3E0	Vesicle transport protein GOT1B
P53992	SEC24C	0.941868	1.02355	0.982709	0.0577579	36	36	35	45.6	45.6	44.3	118.32	0	323.31	17737000000	5840700000	11897000000	30	29	20	23	P53992	Protein transport protein Sec24C
P31949	S100A11	3.82147	3.72056	3.77101	0.0713541	12	12	12	91.4	91.4	91.4	11.74	0	137.16	55119000000	5427300000	49691000000	4	10	8	11	P31949	Protein S100-A11;Protein S100-A11, N-terminally processed
P30040	ERP29	1.98337	1.95994	1.97165	0.0165675	17	17	17	62.1	62.1	62.1	28.993	0	323.31	65709000000	8114000000	57595000000	12	17	13	13	P30040	Endoplasmic reticulum resident protein 29
Q92918	MAP4K1	0.304228		0.304228	#DIV/0!	5	5	5	7.4	7.4	7.4	91.295	0	10.06	102900000	29149000	73750000	2	3	3	0	Q92918	Mitogen-activated protein kinase kinase kinase kinase 1
Q9H3Z4	DNAJC5	2.32857	1.9815	2.15504	0.245416	7	7	7	54.5	54.5	54.5	22.149	0	323.31	2195300000	203950000	1991300000	4	7	4	2	Q9H3Z4	DnaJ homolog subfamily C member 5
P08567	PLEK	4.2386	4.03214	4.13537	0.145989	9	9	9	37.7	37.7	37.7	40.124	0	323.31	8172900000	684640000	7488300000	4	8	8	5	P08567	Pleckstrin
P27707	DCK	-0.296602	-0.355802	-0.326202	0.0418607	10	10	10	36.9	36.9	36.9	30.518	0	104.61	3604100000	1919100000	1685000000	2	6	8	8	P27707	Deoxycytidine kinase
O75844	ZMPSTE24	4.73816	4.15712	4.44764	0.410857	21	21	21	43.6	43.6	43.6	54.812	0	323.31	46246000000	2719000000	43527000000	15	21	18	17	O75844	CAAX prenyl protease 1 homolog
P11047	LAMC1				#DIV/0!	16	16	16	13.1	13.1	13.1	177.6	0	50.956	183460000	9847500	173620000	7	13	1	0	P11047;Q9Y6N6	Laminin subunit gamma-1
P14649	MYL6B	1.10281	1.68777	1.39529	0.413629	11	11	8	57.2	57.2	42.8	22.764	0	28.239	10602000000	2264500000	8337600000	2	10	4	2	P14649	Myosin light chain 6B
Q7Z5G4	GOLGA7	-0.591489	-0.626723	-0.609106	0.0249142	6	6	6	46	46	46	15.824	0	11.358	1062200000	639090000	423100000	1	3	5	4	Q7Z5G4	Golgin subfamily A member 7
Q9Y3C8	UFC1	0.809119	1.14351	0.976315	0.23645	7	7	7	34.7	34.7	34.7	19.458	0	71.119	3151600000	1322300000	1829200000	2	3	4	4	Q9Y3C8	Ubiquitin-fold modifier-conjugating enzyme 1
O43852	CALU	1.27452	0.548359	0.911442	0.513473	20	20	20	66	66	66	37.106	0	323.31	5086300000	976940000	4109400000	9	16	13	10	O43852	Calumenin
Q13370	PDE3B				#DIV/0!	3	3	2	4.6	4.6	3.3	124.33	0	9.0195	110820000	12300000	98516000	2	2	1	1	Q13370	cGMP-inhibited 3,5-cyclic phosphodiesterase B
P03928	MT-ATP8	0.561815	0.61541	0.588612	0.0378974	4	4	4	52.9	52.9	52.9	7.9916	0	22.209	1969600000	826340000	1143200000	0	4	4	4	P03928	ATP synthase protein 8
Q9BWH2	FUNDC2	0.929125	1.03348	0.981302	0.0737901	8	8	8	36	36	36	20.675	0	68.582	2065500000	727520000	1338000000	1	7	4	5	Q9BWH2	FUN14 domain-containing protein 2
Q01826	SATB1	2.39422		2.39422	#DIV/0!	17	17	13	31.6	31.6	26.5	85.956	0	115.34	1238400000	91039000	1147300000	6	11	7	2	Q01826	DNA-binding protein SATB1
Q9UBG0	MRC2	3.81229	2.90724	3.35977	0.639967	39	39	39	37.6	37.6	37.6	166.67	0	323.31	5881200000	541070000	5340100000	26	34	16	16	Q9UBG0	C-type mannose receptor 2
Q5M775	SPECC1				#DIV/0!	3	3	3	3.5	3.5	3.5	118.58	0	12.653	58828000	14502000	44326000	2	0	2	0	Q5M775	Cytospin-B
O00468	AGRN				#DIV/0!	15	15	15	8.7	8.7	8.7	217.32	0	34.03	218560000	9428000	209130000	7	13	1	0	O00468	Agrin;Agrin N-terminal 110 kDa subunit;Agrin C-terminal 110 kDa subunit;Agrin C-terminal 90 kDa fragment;Agrin C-terminal 22 kDa fragment
P05107	ITGB2	3.94709	3.64988	3.79848	0.210159	30	30	30	49.4	49.4	49.4	84.781	0	323.31	28644000000	2467200000	26177000000	18	30	19	16	P05107	Integrin beta-2
Q6ICG6	KIAA0930	2.86572		2.86572	#DIV/0!	4	4	4	12.1	12.1	12.1	45.794	0	9.2558	258450000	42170000	216280000	3	3	2	1	Q6ICG6	Uncharacterized protein KIAA0930
O00425	IGF2BP3		2.82528	2.82528	#DIV/0!	3	2	2	8.8	6.6	6.6	63.704	0	3.2213	1082900000	128860000	954040000	1	2	3	1	O00425	Insulin-like growth factor 2 mRNA-binding protein 3
Q9BZC7	ABCA2				#DIV/0!	10	10	10	6.1	6.1	6.1	269.83	0	15.399	130210000	9444900	120770000	6	8	2	2	Q9BZC7	ATP-binding cassette sub-family A member 2
Q6IAA8	LAMTOR1	-1.3309	-1.2389	-1.2849	0.0650538	12	12	12	83.9	83.9	83.9	17.745	0	150.66	9803900000	5550800000	4253100000	8	10	8	9	Q6IAA8	Ragulator complex protein LAMTOR1
Q9UNX3	RPL26L1	0.365145	0.594649	0.479897	0.162284	15	2	2	55.9	11.7	11.7	17.256	0	3.6225	639440000	257740000	381700000	1	12	12	14	Q9UNX3	60S ribosomal protein L26-like 1
O43447	PPIH	2.62379	2.69444	2.65912	0.0499571	14	14	14	88.1	88.1	88.1	19.208	0	236.15	20709000000	3790600000	16919000000	7	11	10	13	O43447	Peptidyl-prolyl cis-trans isomerase H
P31146	CORO1A	3.95291	3.53347	3.74319	0.296589	20	20	20	41	41	41	51.026	0	116.63	12625000000	926640000	11699000000	13	16	14	12	P31146	Coronin-1A
P05109	S100A8	5.25232	5.18949	5.2209	0.0444275	19	19	19	100	100	100	10.834	0	148.65	91220000000	3106300000	88113000000	9	17	11	13	P05109	Protein S100-A8;Protein S100-A8, N-terminally processed
P20160	AZU1	4.36331		4.36331	#DIV/0!	4	4	4	26.3	26.3	26.3	26.885	0	14.039	328230000	17981000	310250000	1	3	1	2	P20160	Azurocidin
Q13303	KCNAB2	1.92188	2.08304	2.00246	0.113957	16	16	13	55	55	50.4	41	0	169.52	6087900000	762350000	5325500000	5	11	10	8	Q13303	Voltage-gated potassium channel subunit beta-2
Q9HB71	CACYBP	0.700847	0.665709	0.683278	0.0248463	20	20	20	75.9	75.9	75.9	26.21	0	323.31	35182000000	10969000000	24213000000	8	16	16	16	Q9HB71	Calcyclin-binding protein
Q13884	SNTB1	3.65471	2.35227	3.00349	0.920964	8	8	8	24.2	24.2	24.2	58.06	0	37.426	411110000	53519000	357590000	3	1	5	2	Q13884	Beta-1-syntrophin
P51572	BCAP31	1.03042	0.883441	0.956933	0.10393	18	18	18	44.7	44.7	44.7	27.991	0	323.31	17588000000	3468300000	14119000000	8	17	14	15	P51572	B-cell receptor-associated protein 31
O15347	HMGB3	1.65334	1.37299	1.51317	0.198237	12	11	11	54.5	51	51	22.98	0	132.55	8573600000	2116200000	6457400000	2	10	6	9	O15347	High mobility group protein B3
Q96K17	BTF3L4	0.347443	0.729816	0.538629	0.270379	13	13	13	77.2	77.2	77.2	17.27	0	323.31	7849700000	2940300000	4909400000	8	8	10	7	Q96K17	Transcription factor BTF3 homolog 4
P04843	RPN1	1.79838	1.50547	1.65193	0.207119	45	45	45	70.8	70.8	70.8	68.569	0	323.31	275560000000	51112000000	224450000000	36	43	37	34	P04843	Dolichyl-diphosphooligosaccharide--protein glycosyltransferase subunit 1
P20674	COX5A	0.00182111	0.0261756	0.0139984	0.0172212	9	9	9	47.3	47.3	47.3	16.762	0	106.24	9336800000	4255800000	5081000000	3	8	6	6	P20674	Cytochrome c oxidase subunit 5A, mitochondrial
O75937	DNAJC8	-0.423484	-0.206242	-0.314863	0.153613	11	11	11	52.2	52.2	52.2	29.841	0	151.32	4144700000	1971200000	2173500000	2	5	10	4	O75937	DnaJ homolog subfamily C member 8
Q9UMS0	NFU1	1.83616	1.94256	1.88936	0.0752362	5	5	5	24	24	24	28.462	0	14.472	1247700000	198200000	1049500000	1	3	4	4	Q9UMS0	NFU1 iron-sulfur cluster scaffold homolog, mitochondrial
P29966	MARCKS	-0.172776	-0.683711	-0.428244	0.361286	8	8	8	35.2	35.2	35.2	31.554	0	176.2	3233800000	1143900000	2089900000	6	6	5	4	P29966	Myristoylated alanine-rich C-kinase substrate
P50151	GNG10		2.10224	2.10224	#DIV/0!	4	4	4	63.2	63.2	63.2	7.2053	0	6.4615	209520000	39321000	170200000	0	4	0	3	P50151	Guanine nucleotide-binding protein G(I)/G(S)/G(O) subunit gamma-10
P23297	S100A1				#DIV/0!	2	2	2	38.3	38.3	38.3	10.546	0	8.8407	68088000	7629200	60458000	2	2	0	0	P23297	Protein S100-A1
P06737	PYGL	4.36088	3.94774	4.15431	0.292134	51	51	41	66.6	66.6	54.8	97.147	0	323.31	47454000000	3385300000	44068000000	35	44	30	28	P06737	Glycogen phosphorylase, liver form
Q7L7X3	TAOK1	1.01491	0.801019	0.907965	0.151244	19	18	16	20.9	19.6	17.3	116.07	0	87.542	667680000	226980000	440700000	9	13	6	5	Q7L7X3	Serine/threonine-protein kinase TAO1
Q92835	INPP5D	2.95925	3.1971	3.07818	0.168185	89	89	86	81.7	81.7	79.1	133.29	0	323.31	52068000000	5937400000	46131000000	77	79	50	59	Q92835;Q7Z7G1	Phosphatidylinositol 3,4,5-trisphosphate 5-phosphatase 1
Q96DA6	DNAJC19	1.26643	1.29932	1.28288	0.0232567	9	9	9	72.4	72.4	72.4	12.498	0	63.651	3505800000	872190000	2633600000	1	7	7	3	Q96DA6	Mitochondrial import inner membrane translocase subunit TIM14
Q96D96	HVCN1				#DIV/0!	8	8	8	35.9	35.9	35.9	31.683	0	63.373	1183400000	58156000	1125300000	3	8	0	1	Q96D96	Voltage-gated hydrogen channel 1
Q7LDG7	RASGRP2	-0.0478413	0.0356108	-0.00611523	0.0590095	14	14	14	27.3	27.3	27.3	69.248	0	91.761	1244900000	505110000	739820000	5	6	10	5	Q7LDG7	RAS guanyl-releasing protein 2
Q13574	DGKZ	2.01834		2.01834	#DIV/0!	5	5	5	6.9	6.9	6.9	124.13	0	9.4783	141500000	24084000	117410000	2	3	3	1	Q13574	Diacylglycerol kinase zeta
Q8TDZ2	MICAL1	3.69477	3.8541	3.77443	0.112663	42	42	41	48.6	48.6	48.6	117.87	0	252.12	12057000000	1982200000	10075000000	25	38	20	18	Q8TDZ2	Protein-methionine sulfoxide oxidase MICAL1
O94761	RECQL4	1.15337		1.15337	#DIV/0!	5	5	5	6.5	6.5	6.5	133.07	0	19.405	438390000	75077000	363310000	5	0	2	1	O94761	ATP-dependent DNA helicase Q4
P01040	CSTA	3.7625	5.03107	4.39678	0.897014	13	13	13	100	100	100	11.006	0	53.029	12092000000	351630000	11741000000	5	11	9	7	P01040	Cystatin-A;Cystatin-A, N-terminally processed
O15050	TRANK1	2.15244	2.17744	2.16494	0.0176777	29	29	29	12.3	12.3	12.3	336.22	0	45.656	566260000	248250000	318010000	7	11	18	16	O15050	TPR and ankyrin repeat-containing protein 1
P09429;B2RPK0	HMGB1;HMGB1P1	-0.174369	-0.320426	-0.247398	0.103278	19	15	11	71.6	58.6	49.8	24.893	0	212	33873000000	16025000000	17848000000	8	15	15	11	P09429;B2RPK0	High mobility group protein B1;Putative high mobility group protein B1-like 1
P35613	BSG	-0.105423	-0.190005	-0.147714	0.0598085	11	11	11	34.8	34.8	34.8	42.2	0	293.86	11860000000	2590100000	9269700000	6	10	5	4	P35613	Basigin
P09488	GSTM1	2.3515	2.71409	2.5328	0.25639	21	20	6	73.4	70.2	26.1	25.712	0	65.651	3868200000	483600000	3384600000	3	18	11	14	P09488	Glutathione S-transferase Mu 1
Q9Y2R0	COA3	0.914363	0.641816	0.778089	0.19272	7	7	7	49.1	49.1	49.1	11.731	0	10.557	1269400000	484560000	784870000	1	5	6	4	Q9Y2R0	Cytochrome c oxidase assembly factor 3 homolog, mitochondrial
Q8TEM1	NUP210	2.86543	2.80833	2.83688	0.0403758	71	71	71	48.2	48.2	48.2	205.11	0	323.31	97917000000	15399000000	82518000000	62	65	64	60	Q8TEM1	Nuclear pore membrane glycoprotein 210
Q9ULZ3	PYCARD	3.12309	2.96221	3.04265	0.113759	12	12	12	73.8	73.8	73.8	21.627	0	92.04	10069000000	1258700000	8810500000	6	12	7	10	Q9ULZ3	Apoptosis-associated speck-like protein containing a CARD
P13693	TPT1	1.34939	1.55125	1.45032	0.142737	10	10	10	54.1	54.1	54.1	19.595	0	137.49	37532000000	10451000000	27080000000	5	10	9	10	P13693;Q56UQ5;Q9HAU6	Translationally-controlled tumor protein
Q99595	TIMM17A	0.554433	0.0642376	0.309335	0.34662	3	3	3	45.6	45.6	45.6	18.023	0	51.551	647570000	301550000	346030000	3	3	2	2	Q99595	Mitochondrial import inner membrane translocase subunit Tim17-A
P50440	GATM	2.3089		2.3089	#DIV/0!	14	14	14	43.5	43.5	43.5	48.455	0	98.227	1982400000	328990000	1653400000	4	12	5	2	P50440	Glycine amidinotransferase, mitochondrial
Q9BZL1	UBL5	-0.68617	-0.780225	-0.733197	0.0665069	6	6	6	74	74	74	8.5468	0	42.874	1267400000	752950000	514460000	1	5	5	4	Q9BZL1	Ubiquitin-like protein 5
P36639	NUDT1	1.7132	1.96333	1.83827	0.176869	4	4	4	26.9	26.9	26.9	22.519	0	40.977	2907200000	797870000	2109300000	2	3	3	4	P36639	7,8-dihydro-8-oxoguanine triphosphatase
P00966	ASS1	4.84097	5.07366	4.95731	0.164537	25	25	25	66.3	66.3	66.3	46.53	0	323.31	23354000000	1620100000	21734000000	10	20	18	11	P00966	Argininosuccinate synthase
O75940	SMNDC1	0.71476	0.293766	0.504263	0.297688	4	4	4	29.4	29.4	29.4	26.711	0	205.47	1531800000	505460000	1026400000	2	3	2	2	O75940	Survival of motor neuron-related-splicing factor 30
Q71DI3	HIST2H3A	0.472676	0.135954	0.304315	0.238098	9	9	1	55.9	55.9	23.5	15.388	0	112.33	37711000000	12230000000	25481000000	4	6	6	7	Q71DI3	Histone H3.2
Q9HD34	LYRM4	-0.813253	-1.48242	-1.14784	0.473173	6	6	6	46.2	46.2	46.2	10.758	0	21.571	675040000	335140000	339890000	1	3	3	3	Q9HD34	LYR motif-containing protein 4
Q15031	LARS2	0.793283	0.747082	0.770182	0.032669	13	13	13	18.4	18.4	18.4	101.97	0	43.313	1029000000	347830000	681150000	7	8	6	7	Q15031	Probable leucine--tRNA ligase, mitochondrial
P58107	EPPK1		-1.2553	-1.2553	#DIV/0!	14	6	6	15.2	8	8	555.65	0	7.504	178650000	116690000	61957000	11	8	7	9	P58107	Epiplakin
O75298	RTN2	0.492181	0.517576	0.504879	0.017957	6	6	6	11.7	11.7	11.7	59.263	0	72.665	1536900000	408220000	1128700000	3	6	3	5	O75298	Reticulon-2
P36871	PGM1	6.35437	3.83334	5.09386	1.78264	20	20	20	49.1	49.1	49.1	61.448	0	219.73	5533900000	295060000	5238800000	5	18	7	5	P36871	Phosphoglucomutase-1
Q13185	CBX3	0.314853	-0.180267	0.0672932	0.350103	8	7	6	42.6	36.1	27.3	20.811	0	71.392	5032100000	2166300000	2865800000	2	7	5	6	Q13185	Chromobox protein homolog 3
Q9Y2J2	EPB41L3				#DIV/0!	10	4	4	10.4	5.4	5.4	120.68	0	5.7241	93999000	15126000	78873000	6	4	2	5	Q9Y2J2	Band 4.1-like protein 3;Band 4.1-like protein 3, N-terminally processed
P27797	CALR	1.50792	1.46215	1.48503	0.0323643	33	33	33	77.9	77.9	77.9	48.141	0	323.31	230450000000	37704000000	192750000000	19	28	27	23	P27797	Calreticulin
Q9BV57	ADI1	0.896273	1.01065	0.953462	0.0808768	9	9	9	63.7	63.7	63.7	21.498	0	51.083	3032700000	1154100000	1878600000	0	4	6	8	Q9BV57	1,2-dihydroxy-3-keto-5-methylthiopentene dioxygenase
O60234	GMFG	-0.11005	0.14384	0.0168951	0.179527	10	10	7	78.9	78.9	50	16.801	0	323.31	22180000000	8613700000	13566000000	7	7	9	10	O60234	Glia maturation factor gamma
P17900	GM2A	1.3639	1.39623	1.38007	0.0228608	5	5	5	19.2	19.2	19.2	20.838	0	5.3425	1305700000	166400000	1139300000	0	5	2	3	P17900	Ganglioside GM2 activator;Ganglioside GM2 activator isoform short
P01903	HLA-DRA	4.28256		4.28256	#DIV/0!	7	7	7	26.4	26.4	26.4	28.607	0	105.98	6260600000	235180000	6025400000	6	7	4	2	P01903;P01906	HLA class II histocompatibility antigen, DR alpha chain
P17050	NAGA	0.887444	0.852486	0.869965	0.024719	5	5	5	12.7	12.7	12.7	46.564	0	14.13	701890000	194640000	507250000	3	4	5	2	P17050	Alpha-N-acetylgalactosaminidase
Q6P4E1	CASC4				#DIV/0!	9	9	9	24.5	24.5	24.5	48.864	0	97.08	438370000	66285000	372090000	4	7	2	0	Q6P4E1	Protein CASC4
O60232	SSSCA1		-0.438025	-0.438025	#DIV/0!	6	6	6	56.8	56.8	56.8	21.474	0	75.806	506240000	289240000	217000000	2	1	1	3	O60232	Sjoegren syndrome/scleroderma autoantigen 1
Q8IYB3	SRRM1	-0.646009	-0.17334	-0.409675	0.334227	25	25	25	28.9	28.9	28.9	102.33	0	225.34	8443600000	3650900000	4792700000	14	17	12	17	Q8IYB3	Serine/arginine repetitive matrix protein 1
Q86W92	PPFIBP1	2.43142		2.43142	#DIV/0!	10	10	8	12.3	12.3	10	114.02	0	26.992	191010000	57958000	133050000	5	3	3	1	Q86W92	Liprin-beta-1
Q9NP77	SSU72	-0.00394904	0.134662	0.0653563	0.0980128	6	6	6	34	34	34	22.574	0	25.53	1339500000	594820000	744710000	2	3	6	5	Q9NP77	RNA polymerase II subunit A C-terminal domain phosphatase SSU72
Q96HY7	DHTKD1	2.09983		2.09983	#DIV/0!	12	12	12	19.3	19.3	19.3	103.08	0	40.362	593100000	124780000	468320000	6	8	7	2	Q96HY7	Probable 2-oxoglutarate dehydrogenase E1 component DHKTD1, mitochondrial
O95562	SFT2D2		2.14693	2.14693	#DIV/0!	3	3	3	17.5	17.5	17.5	17.779	0	57.532	491900000	50073000	441830000	1	3	1	2	O95562	Vesicle transport protein SFT2B
Q7Z392	TRAPPC11	0.539292	0.362947	0.451119	0.124695	19	19	19	24.8	24.8	24.8	128.88	0	62.521	1640900000	756370000	884550000	13	10	13	7	Q7Z392	Trafficking protein particle complex subunit 11
Q6UXD5	SEZ6L2				#DIV/0!	5	5	5	7.6	7.6	7.6	97.559	0	30.116	171110000	5712600	165390000	3	4	1	1	Q6UXD5	Seizure 6-like protein 2
Q14004	CDK13	2.53695	1.9723	2.25463	0.399268	17	13	13	17.9	14.2	14.2	164.92	0	32.491	522830000	120710000	402120000	12	12	4	4	Q14004;O94921;Q07002	Cyclin-dependent kinase 13
Q9BUL9	RPP25				#DIV/0!	8	8	8	48.7	48.7	48.7	20.632	0	8.0872	290910000	19511000	271390000	0	7	3	1	Q9BUL9	Ribonuclease P protein subunit p25
P07237	P4HB	2.07997	1.5975	1.83874	0.341158	55	55	55	87.6	87.6	87.6	57.116	0	323.31	256240000000	34164000000	222070000000	38	51	27	26	P07237	Protein disulfide-isomerase
Q13683	ITGA7				#DIV/0!	4	4	4	6.4	6.4	6.4	128.95	0	10.504	78164000	5203300	72961000	3	1	1	0	Q13683	Integrin alpha-7;Integrin alpha-7 heavy chain;Integrin alpha-7 light chain;Integrin alpha-7 70 kDa form
Q9H814	PHAX	0.706605	0.998461	0.852533	0.206373	2	2	2	5.6	5.6	5.6	44.402	0	10.725	352890000	132630000	220270000	1	2	1	1	Q9H814	Phosphorylated adapter RNA export protein
Q9H3N1	TMX1	1.40555	1.47335	1.43945	0.0479418	17	17	17	38.6	38.6	38.6	31.791	0	323.31	16128000000	2851700000	13277000000	4	16	8	7	Q9H3N1	Thioredoxin-related transmembrane protein 1
Q8NBJ4	GOLM1				#DIV/0!	9	9	9	24.9	24.9	24.9	45.333	0	47.662	426570000	37033000	389530000	3	7	1	1	Q8NBJ4	Golgi membrane protein 1
Q8IW35	CEP97				#DIV/0!	7	7	7	8.6	8.6	8.6	96.98	0	22.762	153670000	13156000	140510000	2	7	2	1	Q8IW35	Centrosomal protein of 97 kDa
P55061	TMBIM6	0.76919	0.307926	0.538558	0.326163	3	3	3	9.3	9.3	9.3	26.537	0	4.2488	902460000	236370000	666090000	3	2	3	2	P55061	Bax inhibitor 1
P23470	PTPRG	-1.14628		-1.14628	#DIV/0!	8	8	8	8.7	8.7	8.7	162	0	12.568	170970000	87404000	83569000	3	4	4	2	P23470	Receptor-type tyrosine-protein phosphatase gamma
Q9Y6N5	SQRDL	4.18441	3.48612	3.83527	0.493766	24	24	24	64.7	64.7	64.7	49.96	0	272.49	9620900000	887180000	8733700000	12	16	18	11	Q9Y6N5	Sulfide:quinone oxidoreductase, mitochondrial
Q8NE86	MCU	0.385596	0.313435	0.349516	0.0510255	10	10	10	29.3	29.3	29.3	39.866	0	100.33	3995600000	715900000	3279700000	3	10	4	2	Q8NE86	Calcium uniporter protein, mitochondrial
Q9HAV0	GNB4	1.4945	1.01236	1.25343	0.340924	13	6	6	47.9	21.8	21.8	37.567	0	199.53	992500000	222550000	769940000	6	8	10	5	Q9HAV0	Guanine nucleotide-binding protein subunit beta-4
P17812	CTPS1	2.58815	2.54258	2.56536	0.0322229	37	37	34	75.6	75.6	72.9	66.69	0	323.31	50061000000	7908000000	42153000000	24	36	22	22	P17812	CTP synthase 1
A2RUS2	DENND3	0.468719	0.130045	0.299382	0.239479	14	14	14	16.1	16.1	16.1	135.89	0	12.396	267180000	128600000	138580000	3	8	3	7	A2RUS2	DENN domain-containing protein 3
P04181	OAT	-0.646384	-0.671565	-0.658975	0.0178057	17	17	17	55.8	55.8	55.8	48.534	0	307.37	18498000000	9978700000	8519800000	12	13	13	9	P04181	Ornithine aminotransferase, mitochondrial;Ornithine aminotransferase, hepatic form;Ornithine aminotransferase, renal form
P15954	COX7C	-0.106786	0.214944	0.054079	0.227497	3	3	3	50.8	50.8	50.8	7.2454	0	8.9073	2104600000	688780000	1415800000	2	3	2	2	P15954	Cytochrome c oxidase subunit 7C, mitochondrial
Q4KMQ2	ANO6	3.31524	3.41437	3.3648	0.0700955	33	33	33	39.2	39.2	39.2	106.16	0	323.31	11175000000	1031500000	10143000000	28	31	23	14	Q4KMQ2	Anoctamin-6
Q92608	DOCK2	1.86606	1.43135	1.6487	0.307386	103	103	102	57.3	57.3	56.9	211.95	0	323.31	34952000000	8453900000	26498000000	70	90	65	71	Q92608	Dedicator of cytokinesis protein 2
P13674	P4HA1	2.00119	1.71485	1.85802	0.202473	28	28	28	56.6	56.6	56.6	61.049	0	323.31	22316000000	1456600000	20859000000	8	28	9	7	P13674	Prolyl 4-hydroxylase subunit alpha-1
P06730	EIF4E	-0.791549	-0.647019	-0.719284	0.102198	10	10	10	44.2	44.2	44.2	25.097	0	146.34	8990600000	4139900000	4850700000	1	7	8	6	P06730;A6NMX2	Eukaryotic translation initiation factor 4E
P34897	SHMT2	1.85117	1.86472	1.85795	0.0095813	25	25	24	55.2	55.2	55.2	55.992	0	323.31	35436000000	8615700000	26821000000	15	23	18	13	P34897	Serine hydroxymethyltransferase, mitochondrial
Q9UPM8	AP4E1	2.37152		2.37152	#DIV/0!	7	7	7	7.6	7.6	7.6	127.29	0	34.184	68266000	12628000	55638000	5	3	2	2	Q9UPM8	AP-4 complex subunit epsilon-1
Q9H2H8	PPIL3	1.01278	1.09309	1.05293	0.0567877	8	8	8	59.6	59.6	59.6	18.154	0	95.903	1871600000	739840000	1131700000	1	4	4	5	Q9H2H8	Peptidyl-prolyl cis-trans isomerase-like 3
Q9Y3L3	SH3BP1	2.11788	2.09002	2.10395	0.0197	25	25	6	51.1	51.1	13.4	75.712	0	287.68	3828800000	484160000	3344600000	12	20	6	6	Q9Y3L3	SH3 domain-binding protein 1
P55899	FCGRT	2.23461	1.65077	1.94269	0.412837	4	4	4	15.3	15.3	15.3	39.743	0	69.509	410060000	63329000	346730000	2	3	2	2	P55899	IgG receptor FcRn large subunit p51
Q9NZ45	CISD1	0.0846339	0.224319	0.154476	0.0987723	6	6	6	52.8	52.8	52.8	12.199	0	138.85	7323700000	2851600000	4472000000	1	6	6	3	Q9NZ45	CDGSH iron-sulfur domain-containing protein 1
P15559	NQO1	4.67255	2.54855	3.61055	1.50189	11	11	11	40.5	40.5	40.5	30.867	0	118.83	1708200000	116240000	1592000000	3	9	7	2	P15559	NAD(P)H dehydrogenase [quinone] 1
Q96GG9	DCUN1D1	0.223046	0.137432	0.180239	0.0605382	10	10	10	29	29	29	30.124	0	137.26	4496000000	2003600000	2492400000	4	6	8	6	Q96GG9	DCN1-like protein 1
Q9GZT3	SLIRP	0.578825	0.563538	0.571182	0.0108095	13	13	13	79.8	79.8	79.8	12.349	0	76.132	17168000000	7827100000	9341100000	3	9	8	13	Q9GZT3	SRA stem-loop-interacting RNA-binding protein, mitochondrial
Q7Z7L1	SLFN11	0.857993	0.371524	0.614758	0.343986	13	13	13	17.3	17.3	17.3	102.83	0	17.29	499360000	205510000	293850000	3	4	7	5	Q7Z7L1;Q68D06;Q08AF3	Schlafen family member 11
P01034	CST3	1.1515	0.250544	0.70102	0.637072	9	9	9	56.8	56.8	56.8	15.799	0	42.216	1274300000	145460000	1128800000	3	8	2	2	P01034	Cystatin-C
P41091;Q2VIR3	EIF2S3;EIF2S3L	0.71565	0.428362	0.572006	0.203143	15	15	15	39	39	39	51.109	0	323.31	14945000000	5096900000	9848100000	7	7	14	7	P41091;Q2VIR3	Eukaryotic translation initiation factor 2 subunit 3;Putative eukaryotic translation initiation factor 2 subunit 3-like protein
Q9BQ61	C19orf43	-0.0308084	-0.108167	-0.0694876	0.0547008	7	7	7	36.9	36.9	36.9	18.419	0	51.584	1975300000	716850000	1258400000	1	6	5	6	Q9BQ61	Uncharacterized protein C19orf43
P29401	TKT	0.706605	0.593101	0.649853	0.0802594	40	40	40	78	78	78	67.877	0	323.31	222080000000	72683000000	149390000000	29	38	37	27	P29401	Transketolase
P54886	ALDH18A1	3.39426	3.22484	3.30955	0.119798	31	31	31	48.3	48.3	48.3	87.301	0	323.31	7339100000	1464900000	5874200000	13	21	11	21	P54886	Delta-1-pyrroline-5-carboxylate synthase;Glutamate 5-kinase;Gamma-glutamyl phosphate reductase
O95476	CTDNEP1	0.509462		0.509462	#DIV/0!	4	4	4	21.7	21.7	21.7	28.377	0	43.207	314700000	65162000	249540000	2	1	3	1	O95476	CTD nuclear envelope phosphatase 1
P40121	CAPG	3.02815	2.62701	2.82758	0.283649	15	15	15	56.3	56.3	56.3	38.498	0	323.31	37596000000	3962800000	33634000000	7	14	12	9	P40121	Macrophage-capping protein
P82909	MRPS36	0.535485	0.79931	0.667397	0.186552	6	6	6	69.9	69.9	69.9	11.466	0	35.756	1657500000	765770000	891760000	1	5	5	3	P82909	28S ribosomal protein S36, mitochondrial
P30405	PPIF	1.89084	2.02609	1.95846	0.0956362	9	8	8	63.8	60.4	60.4	22.04	0	137.3	4885000000	1217200000	3667800000	2	5	8	8	P30405	Peptidyl-prolyl cis-trans isomerase F, mitochondrial
Q9Y2B0	CNPY2	2.18	2.32407	2.25203	0.101873	12	12	12	66.5	66.5	66.5	20.652	0	283.52	11393000000	2309000000	9084200000	4	11	8	9	Q9Y2B0	Protein canopy homolog 2
Q0VD83	APOBR	2.61848	2.15834	2.38841	0.325368	38	38	38	50	50	50	114.87	0	323.31	3894300000	484220000	3410100000	30	31	16	10	Q0VD83	Apolipoprotein B receptor
O60869	EDF1	0.204833	0.365465	0.285149	0.113584	8	8	8	51.4	51.4	51.4	16.368	0	58.696	2335400000	1074400000	1261000000	1	5	5	6	O60869	Endothelial differentiation-related factor 1
P49755	TMED10	0.563204	0.742723	0.652964	0.126939	13	13	13	49.8	49.8	49.8	24.976	0	323.31	19764000000	6849400000	12914000000	6	10	8	8	P49755	Transmembrane emp24 domain-containing protein 10
P63098	PPP3R1	-1.03878	-1.17681	-1.10779	0.0976019	8	8	8	59.4	59.4	59.4	19.3	0	138.42	2780900000	1691600000	1089300000	7	5	8	4	P63098	Calcineurin subunit B type 1
P80723	BASP1	1.71725	2.02549	1.87137	0.217959	9	9	9	69.2	69.2	69.2	22.693	0	162.81	2219000000	551180000	1667800000	4	5	8	3	P80723	Brain acid soluble protein 1
Q8N6N3	C1orf52	1.94755	1.48335	1.71545	0.328239	4	4	4	20.9	20.9	20.9	20.599	0	8.1583	492200000	151490000	340710000	0	3	4	3	Q8N6N3	UPF0690 protein C1orf52
Q15800	MSMO1				#DIV/0!	3	3	3	13	13	13	35.215	0	32.738	354930000	69428000	285500000	2	2	2	1	Q15800	Methylsterol monooxygenase 1
Q9Y2D2	SLC35A3				#DIV/0!	2	2	2	8.9	8.9	8.9	35.984	0.0011678	2.1518	102870000	17051000	85821000	1	2	1	1	Q9Y2D2	UDP-N-acetylglucosamine transporter
O95232	LUC7L3	-0.531893	-0.396161	-0.464027	0.095977	10	10	10	25.5	25.5	25.5	51.466	0	56.032	3245100000	1526800000	1718200000	8	7	6	5	O95232	Luc7-like protein 3
Q8WXA9	SREK1		0.25909	0.25909	#DIV/0!	4	4	4	13	13	13	59.38	0	37.185	912550000	370310000	542230000	2	4	1	2	Q8WXA9	Splicing regulatory glutamine/lysine-rich protein 1
O43677	NDUFC1	0.296296		0.296296	#DIV/0!	2	2	2	27.6	27.6	27.6	8.7341	0	3.7706	638090000	289860000	348230000	0	2	2	1	O43677	NADH dehydrogenase [ubiquinone] 1 subunit C1, mitochondrial
Q15041	ARL6IP1		0.0622307	0.0622307	#DIV/0!	3	3	3	13.8	13.8	13.8	23.362	0	4.6092	1792100000	625350000	1166800000	0	3	0	2	Q15041	ADP-ribosylation factor-like protein 6-interacting protein 1
Q9C0E8	LNP				#DIV/0!	4	4	4	9.6	9.6	9.6	47.739	0	5.4509	311680000	20025000	291660000	2	4	0	0	Q9C0E8	Protein lunapark
P78382	SLC35A1	0.760918		0.760918	#DIV/0!	4	4	4	13.6	13.6	13.6	36.778	0	5.3814	162050000	54835000	107220000	2	1	2	1	P78382	CMP-sialic acid transporter
Q9HDC9	APMAP	0.902324	1.22752	1.06492	0.229948	17	17	17	46.9	46.9	46.9	46.48	0	215.66	14951000000	3444800000	11506000000	13	14	13	4	Q9HDC9	Adipocyte plasma membrane-associated protein
Q99856	ARID3A	2.85801	3.79309	3.32555	0.661201	11	11	10	29.8	29.8	27.2	62.888	0	80.287	1124400000	139090000	985290000	6	8	8	3	Q99856;A6NKF2	AT-rich interactive domain-containing protein 3A
Q9BPW9	DHRS9	4.04218	2.81305	3.42762	0.869126	12	12	12	37.6	37.6	37.6	35.227	0	136.19	3092700000	338510000	2754200000	5	9	6	5	Q9BPW9	Dehydrogenase/reductase SDR family member 9
O00160	MYO1F	2.59156	2.52844	2.56	0.0446326	45	45	40	53.2	53.2	47.3	124.84	0	323.31	13272000000	2380000000	10892000000	23	33	25	28	O00160	Unconventional myosin-If
P30533	LRPAP1	2.41639		2.41639	#DIV/0!	16	16	16	44	44	44	41.465	0	215.94	1573600000	171380000	1402200000	0	11	10	1	P30533	Alpha-2-macroglobulin receptor-associated protein
P13667	PDIA4	1.68498	1.79248	1.73873	0.076014	52	52	51	72.6	72.6	72.6	72.932	0	323.31	69740000000	11240000000	58500000000	31	47	28	24	P13667	Protein disulfide-isomerase A4
Q8IWT6	LRRC8A	0.320621		0.320621	#DIV/0!	10	8	8	15.4	12.8	12.8	94.198	0	26.508	419020000	85816000	333210000	8	8	1	1	Q8IWT6	Volume-regulated anion channel subunit LRRC8A
Q9C037	TRIM4	-0.398796	0.809085	0.205144	0.854101	3	3	3	7.8	7.8	7.8	57.46	0	8.3998	21735000000	9918900000	11816000000	2	1	3	1	Q9C037	E3 ubiquitin-protein ligase TRIM4
P00492	HPRT1	1.84875	1.90116	1.87496	0.0370595	15	15	14	81.2	81.2	78	24.579	0	319.78	35653000000	7121600000	28531000000	8	14	14	13	P00492	Hypoxanthine-guanine phosphoribosyltransferase
Q643R3	LPCAT4				#DIV/0!	3	3	3	8.6	8.6	8.6	57.218	0	5.5768	275650000	73269000	202380000	2	3	1	1	Q643R3	Lysophospholipid acyltransferase LPCAT4
O60449	LY75	3.97994	3.63089	3.80541	0.246816	53	53	53	39.8	39.8	39.8	198.31	0	323.31	8496800000	957390000	7539400000	33	48	29	24	O60449	Lymphocyte antigen 75
Q9H0U4	RAB1B	-0.483169	0.0309814	-0.226094	0.363559	14	7	7	78.1	50.7	50.7	22.171	0	272.95	11639000000	5296900000	6342600000	9	13	11	10	Q9H0U4;Q92928	Ras-related protein Rab-1B
Q9BPX5	ARPC5L	1.7685	2.78994	2.27922	0.722267	7	6	6	63.4	58.2	58.2	16.941	0	119.23	5226600000	1203700000	4023000000	2	6	4	4	Q9BPX5	Actin-related protein 2/3 complex subunit 5-like protein
Q32P28	LEPRE1	3.34152	3.39171	3.36661	0.0354897	23	23	23	48.4	48.4	48.4	83.393	0	282.95	12030000000	1324200000	10706000000	12	20	12	10	Q32P28;Q8IVL5	Prolyl 3-hydroxylase 1
P30273	FCER1G	5.41603	4.6955	5.05577	0.509492	4	4	4	39.5	39.5	39.5	9.6674	0	5.6856	1872100000	124240000	1747900000	0	4	3	4	P30273	High affinity immunoglobulin epsilon receptor subunit gamma
O75368	SH3BGRL	0.382668	0.295774	0.339221	0.0614433	13	13	13	87.7	87.7	87.7	12.774	0	223.83	15952000000	5568900000	10384000000	6	12	10	8	O75368	SH3 domain-binding glutamic acid-rich-like protein
P05204;Q15651	HMGN2;HMGN3	0.73473		0.73473	#DIV/0!	3	3	3	16.7	16.7	16.7	9.3926	0	6.2203	246500000	112850000	133650000	0	2	3	1	P05204;Q15651	Non-histone chromosomal protein HMG-17;High mobility group nucleosome-binding domain-containing protein 3
Q8WVV9	HNRNPLL	1.12367	0.710927	0.9173	0.291853	12	11	11	28.8	27.5	27.5	60.082	0	36.876	925330000	333140000	592190000	4	7	8	4	Q8WVV9	Heterogeneous nuclear ribonucleoprotein L-like
Q5JU69;Q8N2E6	TOR2A		0.90754	0.90754	#DIV/0!	3	3	3	15	15	15	35.714	0	52.882	604810000	189730000	415080000	2	2	0	1	Q5JU69;Q8N2E6	Torsin-2A;Prosalusin;Salusin-alpha;Salusin-beta
Q9Y5U9	IER3IP1	1.76272	1.68977	1.72624	0.0515834	2	2	2	34.1	34.1	34.1	8.9687	0	75.999	6202500000	1452000000	4750500000	2	2	2	2	Q9Y5U9	Immediate early response 3-interacting protein 1
O95139	NDUFB6	0.112921	0.313893	0.213407	0.142109	4	4	4	35.9	35.9	35.9	15.489	0	14.791	2084500000	731440000	1353100000	2	2	3	3	O95139	NADH dehydrogenase [ubiquinone] 1 beta subcomplex subunit 6
P20701	ITGAL	3.05982	3.24835	3.15408	0.133311	22	22	22	22	22	22	128.77	0	235.22	1630300000	124800000	1505500000	10	17	7	5	P20701	Integrin alpha-L
P0C7P0	CISD3	0.553176	0.203722	0.378449	0.247101	7	7	7	40.2	40.2	40.2	14.215	0	11.313	405380000	109590000	295800000	0	4	3	6	P0C7P0	CDGSH iron-sulfur domain-containing protein 3, mitochondrial
Q8IZQ1	WDFY3	1.52767	1.72363	1.62565	0.138565	18	18	18	5.7	5.7	5.7	395.25	0	16.842	191920000	54304000	137620000	9	4	6	4	Q8IZQ1	WD repeat and FYVE domain-containing protein 3
P20292	ALOX5AP	4.36709	5.22468	4.79589	0.606408	4	4	4	19.9	19.9	19.9	18.157	0	6.6073	4676400000	659500000	4016900000	2	4	3	2	P20292	Arachidonate 5-lipoxygenase-activating protein
P46939	UTRN	2.14605	1.96683	2.05644	0.126728	129	129	127	43.8	43.8	43.3	394.46	0	323.31	9677700000	3054400000	6623300000	77	98	70	84	P46939;REV__Q5VTR2;Q13474	Utrophin
P28799	GRN	1.53903	1.57693	1.55798	0.0267993	15	15	15	31.5	31.5	31.5	63.544	0	31.059	1165200000	240480000	924740000	3	10	9	4	P28799	Granulins;Acrogranin;Paragranulin;Granulin-1;Granulin-2;Granulin-3;Granulin-4;Granulin-5;Granulin-6;Granulin-7
Q96BN8	OTULIN	0.805747		0.805747	#DIV/0!	4	4	4	14.2	14.2	14.2	40.262	0	3.6421	155530000	71877000	83658000	1	1	3	0	Q96BN8	Ubiquitin thioesterase otulin
P49768	PSEN1	0.441208	1.41168	0.926442	0.686227	4	4	4	13.5	13.5	13.5	52.667	0	83.267	212790000	43055000	169740000	2	4	1	2	P49768;P49810	Presenilin-1;Presenilin-1 NTF subunit;Presenilin-1 CTF subunit;Presenilin-1 CTF12
P52815	MRPL12	-0.559382	-0.0944294	-0.326906	0.328771	9	9	9	51	51	51	21.348	0	47.628	8122600000	3866700000	4256000000	5	5	8	4	P52815	39S ribosomal protein L12, mitochondrial
Q8WU90	ZC3H15	-0.450324	0.207308	-0.121508	0.465016	12	12	12	35.2	35.2	35.2	48.602	0	149.01	3447700000	1465900000	1981700000	5	6	9	6	Q8WU90	Zinc finger CCCH domain-containing protein 15
Q8NF50	DOCK8	1.82581	1.74337	1.78459	0.0582939	97	97	93	50.4	50.4	49.2	238.53	0	323.31	24440000000	6689700000	17751000000	66	74	64	62	Q8NF50	Dedicator of cytokinesis protein 8
P09382	LGALS1	1.87752	1.91793	1.89773	0.0285742	18	18	18	95.6	95.6	95.6	14.716	0	323.31	139910000000	22796000000	117120000000	9	18	14	13	P09382	Galectin-1
P53999	SUB1	0.642843	0.719442	0.681142	0.0541637	15	15	15	70.9	70.9	70.9	14.395	0	210.19	26287000000	8340600000	17946000000	7	12	8	10	P53999	Activated RNA polymerase II transcriptional coactivator p15
P27544	CERS1				#DIV/0!	2	2	2	10.9	10.9	10.9	39.536	0	4.9192	78860000	10568000	68292000	2	2	1	0	P27544	Ceramide synthase 1
Q13535	ATR	1.9147	1.81835	1.86652	0.0681297	27	27	27	12.8	12.8	12.8	301.36	0	35.947	472370000	122030000	350330000	2	4	19	14	Q13535	Serine/threonine-protein kinase ATR
P10809	HSPD1	1.05218	1.00583	1.029	0.0327744	66	66	66	88.1	88.1	88.1	61.054	0	323.31	706780000000	162600000000	544190000000	43	64	55	47	P10809	60 kDa heat shock protein, mitochondrial
P61966	AP1S1	0.843547	1.04797	0.945759	0.144549	4	4	3	32.3	32.3	27.2	18.733	0	81.191	639960000	244460000	395500000	3	3	4	2	P61966	AP-1 complex subunit sigma-1A
P06753	TPM3	0.526287	0.44001	0.483148	0.0610071	19	10	9	47.7	28.1	24.9	32.95	0	185.35	24460000000	8194700000	16266000000	2	15	12	11	P06753	Tropomyosin alpha-3 chain
Q14914	PTGR1	4.50866	3.25722	3.88294	0.884902	12	12	12	45.9	45.9	45.9	35.869	0	53.51	2207200000	159940000	2047300000	3	6	10	6	Q14914	Prostaglandin reductase 1
O95352	ATG7	4.0543	3.87604	3.96517	0.126049	27	27	27	54.1	54.1	54.1	77.959	0	251.74	6146800000	637870000	5509000000	15	26	11	14	O95352	Ubiquitin-like modifier-activating enzyme ATG7
Q15067	ACOX1	1.59375	1.99914	1.79644	0.286654	21	21	21	45.9	45.9	45.9	74.423	0	323.31	11096000000	2014900000	9081000000	13	17	14	8	Q15067	Peroxisomal acyl-coenzyme A oxidase 1
P08246	ELANE	3.99721	3.803	3.9001	0.137327	12	12	12	46.8	46.8	46.8	28.518	0	155.19	5999900000	645170000	5354700000	6	12	7	4	P08246	Neutrophil elastase
P30837	ALDH1B1	1.42751	1.62795	1.52773	0.141732	4	4	4	13	13	13	57.206	0	13.841	401210000	129090000	272110000	2	1	2	3	P30837	Aldehyde dehydrogenase X, mitochondrial
O75427	LRCH4	2.1289	2.38281	2.25586	0.179541	13	13	13	35.3	35.3	35.3	73.449	0	81.239	871470000	139900000	731570000	5	11	3	6	O75427	Leucine-rich repeat and calponin homology domain-containing protein 4
P15121	AKR1B1	1.99848	2.05529	2.02689	0.0401707	20	20	20	69	69	69	35.853	0	323.31	18086000000	4306800000	13780000000	5	9	18	8	P15121;C9JRZ8	Aldose reductase
O43633	CHMP2A	-1.07622		-1.07622	#DIV/0!	6	6	6	22.5	22.5	22.5	25.104	0	153.22	1182500000	294530000	887940000	0	5	3	1	O43633	Charged multivesicular body protein 2a
Q92544	TM9SF4	2.24657	2.01116	2.12886	0.16646	17	17	17	27.4	27.4	27.4	74.518	0	134.7	8317900000	1739200000	6578700000	12	17	10	7	Q92544	Transmembrane 9 superfamily member 4
P60660	MYL6	1.48608	1.61677	1.55143	0.0924118	9	6	6	59.6	39.7	39.7	16.93	0	78.683	20816000000	5229800000	15586000000	4	9	9	8	P60660	Myosin light polypeptide 6
Q9H477	RBKS				#DIV/0!	5	5	5	21.4	21.4	21.4	34.143	0	17.039	531630000	29496000	502130000	2	3	3	0	Q9H477	Ribokinase
P04150	NR3C1	2.85932		2.85932	#DIV/0!	5	5	5	7.9	7.9	7.9	85.658	0	14.044	237580000	51004000	186580000	4	2	4	1	P04150	Glucocorticoid receptor
O75718	CRTAP	3.42137	3.0638	3.24258	0.25284	16	16	16	45.9	45.9	45.9	46.561	0	141.23	4910000000	618630000	4291400000	8	10	10	7	O75718;Q92791	Cartilage-associated protein
Q16778;P33778;P23527;P06899;Q8N257;Q96A08	HIST2H2BE;HIST1H2BB;HIST1H2BO;HIST1H2BJ;HIST3H2BB;HIST1H2BA	0.765861	0.894566	0.830214	0.0910082	14	2	0	67.5	7.9	0	13.92	0	2.8785	4326200000	1669300000	2656900000	7	11	10	12	Q16778;P33778;P23527;P06899;Q8N257;Q96A08	Histone H2B type 2-E;Histone H2B type 1-B;Histone H2B type 1-O;Histone H2B type 1-J;Histone H2B type 3-B;Histone H2B type 1-A
Q00688	FKBP3	0.67515	0.761606	0.718378	0.0611336	12	12	12	45.1	45.1	45.1	25.177	0	306.68	7036400000	2177300000	4859100000	1	8	9	5	Q00688	Peptidyl-prolyl cis-trans isomerase FKBP3
O15533	TAPBP	1.07439	0.849613	0.961999	0.158941	7	7	7	29.9	29.9	29.9	47.625	0	39.976	3045100000	694680000	2350400000	2	6	5	2	O15533	Tapasin
P50452	SERPINB8				#DIV/0!	8	6	6	21.4	15.5	15.5	42.766	0	73.898	783510000	44112000	739400000	5	7	3	3	P50452	Serpin B8
O60291	MGRN1				#DIV/0!	5	5	4	12.1	12.1	10.3	60.752	0.00017235	2.8342	67514000	8939500	58575000	2	4	0	0	O60291	E3 ubiquitin-protein ligase MGRN1
A6NDG6	PGP	2.24834	1.75078	1.99956	0.351828	10	10	10	43.6	43.6	43.6	34.006	0	106.78	2660800000	419450000	2241400000	3	8	5	5	A6NDG6	Phosphoglycolate phosphatase
P31946	YWHAB	0.924406	1.02345	0.973928	0.0700347	22	15	13	88.6	68.3	61.8	28.082	0	323.31	56977000000	16340000000	40637000000	10	17	18	15	P31946	14-3-3 protein beta/alpha;14-3-3 protein beta/alpha, N-terminally processed
P61020	RAB5B	1.93767	2.0274	1.98253	0.0634487	10	7	7	72.1	57.2	57.2	23.707	0	323.31	9975000000	1495300000	8479800000	8	10	10	8	P61020	Ras-related protein Rab-5B
O60262	GNG7	-1.64759	-1.2662	-1.4569	0.269683	5	5	5	67.6	67.6	67.6	7.5217	0	19.29	342100000	164390000	177710000	1	3	4	2	O60262	Guanine nucleotide-binding protein G(I)/G(S)/G(O) subunit gamma-7
Q15274	QPRT	3.59384		3.59384	#DIV/0!	6	6	6	38.7	38.7	38.7	30.845	0	62.615	1229600000	64543000	1165000000	2	5	2	3	Q15274	Nicotinate-nucleotide pyrophosphorylase [carboxylating]
P10319;P18465	HLA-B	2.5544	2.78877	2.67159	0.165725	12	7	0	47.2	30.9	0	40.337	0	192.68	3637300000	449190000	3188100000	4	11	10	4	P10319;P18465	HLA class I histocompatibility antigen, B-58 alpha chain;HLA class I histocompatibility antigen, B-57 alpha chain
O60925	PFDN1	1.09631	1.14128	1.1188	0.0317986	8	8	8	57.4	57.4	57.4	14.21	0	11.877	2424000000	683940000	1740100000	2	5	5	2	O60925	Prefoldin subunit 1
Q14019	COTL1	-0.0800074	-0.00193861	-0.040973	0.055203	15	15	15	79.6	79.6	79.6	15.945	0	126.72	12131000000	4756800000	7374200000	7	11	10	13	Q14019	Coactosin-like protein
Q9BQ49	SMIM7	0.597711	0.928871	0.763291	0.234165	5	5	5	36	36	36	8.6312	0	7.2585	120050000	32409000	87643000	0	4	2	3	Q9BQ49	Small integral membrane protein 7
Q70HW3	SLC25A26				#DIV/0!	4	4	4	21.5	21.5	21.5	29.353	0	15.306	295590000	70073000	225520000	3	3	1	1	Q70HW3	S-adenosylmethionine mitochondrial carrier protein
Q15369	TCEB1	0.201065	0.255614	0.228339	0.038572	8	8	8	66.1	66.1	66.1	12.473	0	149.82	8864100000	3557700000	5306400000	2	7	7	7	Q15369	Transcription elongation factor B polypeptide 1
Q16851	UGP2	0.728436	0.69036	0.709398	0.0269238	24	24	24	51	51	51	56.94	0	323.31	11909000000	2937700000	8970900000	12	21	11	12	Q16851	UTP--glucose-1-phosphate uridylyltransferase
O60568	PLOD3	1.60097	1.33718	1.46908	0.186528	28	28	28	46.6	46.6	46.6	84.784	0	311.74	10398000000	3518000000	6880400000	12	25	12	12	O60568	Procollagen-lysine,2-oxoglutarate 5-dioxygenase 3
P60174	TPI1	0.511324	0.625314	0.568319	0.0806031	36	36	36	80.4	80.4	80.4	30.791	0	323.31	375160000000	108610000000	266550000000	19	31	23	27	P60174	Triosephosphate isomerase
P13984	GTF2F2	-0.292128	-0.384359	-0.338243	0.0652172	18	18	18	71.9	71.9	71.9	28.38	0	274.7	4351300000	2156700000	2194600000	5	15	9	12	P13984	General transcription factor IIF subunit 2
Q8IV08	PLD3	2.79006	2.73781	2.76394	0.0369463	16	16	16	44.7	44.7	44.7	54.705	0	124.78	10821000000	1202200000	9618800000	9	16	9	9	Q8IV08	Phospholipase D3
P58546	MTPN	0.717047	0.597355	0.657201	0.084635	13	13	13	91.5	91.5	91.5	12.895	0	270.63	17128000000	8895600000	8232600000	6	11	8	11	P58546	Myotrophin
Q7Z5R6	APBB1IP	2.71828	2.80568	2.76198	0.0618011	16	16	16	30.3	30.3	30.3	73.182	0	125.57	2654800000	304630000	2350200000	7	13	6	6	Q7Z5R6;Q70E73	Amyloid beta A4 precursor protein-binding family B member 1-interacting protein
O95340	PAPSS2	2.65551	6.73725	4.69638	2.88623	17	17	16	35	35	32.7	69.5	0	63.51	1183900000	55078000	1128800000	8	7	6	7	O95340	Bifunctional 3-phosphoadenosine 5-phosphosulfate synthase 2;Sulfate adenylyltransferase;Adenylyl-sulfate kinase
Q7Z5Y6;P34820	BMP8A;BMP8B				#DIV/0!	4	4	4	15.2	15.2	15.2	44.798	0	9.4926	295570000	38674000	256890000	3	2	2	1	Q7Z5Y6;P34820	Bone morphogenetic protein 8A;Bone morphogenetic protein 8B
Q7Z4H8	KDELC2	0.711579		0.711579	#DIV/0!	6	6	6	15.8	15.8	15.8	58.572	0	31.934	422500000	100090000	322400000	4	5	3	1	Q7Z4H8	KDEL motif-containing protein 2
P43405	SYK	1.06612	1.10991	1.08801	0.0309642	26	26	26	61.9	61.9	61.9	72.065	0	317.77	4793200000	1059600000	3733600000	17	20	12	8	P43405	Tyrosine-protein kinase SYK
Q14643	ITPR1	2.54178	2.42257	2.48217	0.0842942	103	103	90	41.6	41.6	37.6	313.93	0	323.31	14287000000	3023600000	11263000000	62	84	72	55	Q14643	Inositol 1,4,5-trisphosphate receptor type 1
Q16555	DPYSL2	1.34525	1.05121	1.19823	0.207918	22	22	19	58	58	51.6	62.293	0	317.08	8583000000	1396200000	7186800000	10	19	9	10	Q16555;Q14195	Dihydropyrimidinase-related protein 2
P49459	UBE2A	1.04852	0.878014	0.963268	0.120566	3	3	3	30.9	30.9	30.9	17.315	0	68.982	1036600000	337490000	699090000	2	2	2	2	P49459;P63146	Ubiquitin-conjugating enzyme E2 A
P51854	TKTL1	4.73377	4.46335	4.59856	0.191216	37	37	37	80	80	80	65.333	0	323.31	45329000000	2384700000	42945000000	22	31	29	28	P51854	Transketolase-like protein 1
P04792	HSPB1	4.51144	4.37973	4.44559	0.093133	22	22	22	87.3	87.3	87.3	22.782	0	323.31	60566000000	5574500000	54992000000	8	17	17	17	P04792	Heat shock protein beta-1
Q8N183	NDUFAF2	-0.865042	-0.856334	-0.860688	0.00615749	8	8	8	49.7	49.7	49.7	19.856	0	164.45	2455600000	1416200000	1039400000	0	5	6	8	Q8N183	Mimitin, mitochondrial
Q969H8	MYDGF	0.856706	0.893058	0.874882	0.0257047	7	7	7	39.3	39.3	39.3	18.795	0	118.61	13516000000	4048900000	9466600000	3	5	5	6	Q969H8	Myeloid-derived growth factor
Q9BWU0	SLC4A1AP	1.2845	0.885715	1.08511	0.281984	14	14	14	20.6	20.6	20.6	88.813	0	38.492	870220000	403860000	466370000	10	10	6	4	Q9BWU0	Kanadaptin
P98194	ATP2C1				#DIV/0!	7	7	7	9.7	9.7	9.7	100.58	0	19.945	190710000	48784000	141920000	6	2	1	0	P98194	Calcium-transporting ATPase type 2C member 1
P36873	PPP1CC	-0.717658	-0.937012	-0.827335	0.155107	20	5	5	69	21.4	21.4	36.983	0	28.645	1735000000	1070600000	664380000	10	11	17	12	P36873	Serine/threonine-protein phosphatase PP1-gamma catalytic subunit
Q969P0	IGSF8	-0.164943		-0.164943	#DIV/0!	8	8	8	19.4	19.4	19.4	65.033	0	80.781	498570000	126210000	372360000	4	6	3	1	Q969P0	Immunoglobulin superfamily member 8
Q8NBL1	POGLUT1	0.505445		0.505445	#DIV/0!	8	8	8	21.7	21.7	21.7	46.189	0	11.279	508930000	183650000	325280000	2	7	5	2	Q8NBL1	Protein O-glucosyltransferase 1
Q8N4H5	TOMM5	1.49901	1.35808	1.42854	0.0996526	10	10	10	90.2	90.2	90.2	6.0352	0	7.7474	4807600000	1172200000	3635400000	2	9	3	7	Q8N4H5	Mitochondrial import receptor subunit TOM5 homolog
O95159	ZFPL1				#DIV/0!	2	2	2	9	9	9	34.114	0	4.2186	106130000	34478000	71654000	0	2	1	1	O95159	Zinc finger protein-like 1
Q15293	RCN1	0.23267	-0.00840986	0.11213	0.170469	10	10	10	44.4	44.4	44.4	38.89	0	121.63	1480100000	799170000	680970000	2	5	9	4	Q15293	Reticulocalbin-1
P18859	ATP5J	0.798134	0.838738	0.818436	0.0287114	7	7	7	53.7	53.7	53.7	12.587	0	132.56	1567200000	529030000	1038100000	1	5	5	6	P18859	ATP synthase-coupling factor 6, mitochondrial
P40227	CCT6A	0.605045	0.369753	0.487399	0.166377	36	36	30	77	77	71.6	58.024	0	323.31	42339000000	11918000000	30420000000	22	29	24	19	P40227	T-complex protein 1 subunit zeta
Q9Y6M7	SLC4A7	1.58351	1.98836	1.78594	0.286272	20	20	20	18.3	18.3	18.3	136.04	0	34.524	1084600000	182350000	902240000	15	15	9	7	Q9Y6M7;Q2Y0W8	Sodium bicarbonate cotransporter 3
Q5H9U9	DDX60L	2.85077	1.86406	2.35742	0.697709	15	14	14	11.4	11	11	197.67	0	48.496	239370000	30614000	208760000	6	8	6	6	Q5H9U9	Probable ATP-dependent RNA helicase DDX60-like
Q7L1Q6	BZW1	0.982807	0.569441	0.776124	0.292294	17	17	15	29.8	29.8	28.4	48.043	0	22.493	6346500000	1835300000	4511200000	5	10	12	4	Q7L1Q6	Basic leucine zipper and W2 domain-containing protein 1
Q8N5G0	SMIM20	0.392359	0.334534	0.363447	0.0408884	2	2	2	32.8	32.8	32.8	7.7019	0	4.1849	369980000	155900000	214090000	1	2	2	2	Q8N5G0	Small integral membrane protein 20
Q92896	GLG1	1.84368	1.63933	1.74151	0.144497	54	54	54	54.9	54.9	54.9	134.55	0	323.31	19006000000	3772200000	15234000000	39	46	38	30	Q92896	Golgi apparatus protein 1
Q9NZM1	MYOF	3.86015	2.72846	3.2943	0.800226	87	87	86	51.3	51.3	50.7	234.71	0	323.31	9483500000	1983100000	7500400000	49	68	35	52	Q9NZM1	Myoferlin
Q13094	LCP2	-1.88771	-2.98448	-2.43609	0.775534	18	18	18	34.1	34.1	34.1	60.187	0	42.932	1822100000	1298900000	523180000	10	8	6	7	Q13094	Lymphocyte cytosolic protein 2
Q8TCT9	HM13	1.08794	1.04522	1.06658	0.0302076	9	9	9	23.1	23.1	23.1	41.488	0	280.85	7955600000	2127500000	5828100000	8	8	9	5	Q8TCT9	Minor histocompatibility antigen H13
Q9UM00	TMCO1	1.90932	2.44848	2.1789	0.381244	7	7	7	27.7	27.7	27.7	21.175	0	47.505	16310000000	2207600000	14102000000	3	7	3	5	Q9UM00	Transmembrane and coiled-coil domain-containing protein 1
P09525	ANXA4	3.10604	2.91019	3.00811	0.138487	28	28	28	72.7	72.7	72.7	35.882	0	323.31	90212000000	9179100000	81033000000	7	26	19	9	P09525	Annexin A4
Q9BS26	ERP44	1.29659	1.20052	1.24855	0.0679317	17	17	17	51.2	51.2	51.2	46.971	0	225.96	18461000000	4435300000	14025000000	6	12	12	8	Q9BS26	Endoplasmic reticulum resident protein 44
Q9HCJ6	VAT1L	3.55798	3.1386	3.34829	0.296546	18	18	18	58.2	58.2	58.2	45.899	0	248.11	6450600000	262280000	6188400000	6	12	17	7	Q9HCJ6	Synaptic vesicle membrane protein VAT-1 homolog-like
Q0VDG4	SCRN3	0.558197		0.558197	#DIV/0!	3	3	3	8.5	8.5	8.5	48.544	0	6.2343	225370000	53068000	172300000	1	1	3	0	Q0VDG4	Secernin-3
P99999	CYCS	1.02884	1.27476	1.1518	0.173892	10	10	7	62.9	62.9	46.7	11.749	0	63.87	11227000000	3296900000	7930300000	5	9	7	7	P99999	Cytochrome c
Q6ZS81	WDFY4	3.61881	3.92763	3.77322	0.218369	71	71	71	29.5	29.5	29.5	353.61	0	323.31	3267100000	411470000	2855700000	43	52	37	38	Q6ZS81	WD repeat- and FYVE domain-containing protein 4
P10415	BCL2	2.45219	1.84109	2.14664	0.432113	6	6	5	49.8	49.8	46.9	26.266	0	43.227	1765400000	209620000	1555800000	5	4	2	3	P10415	Apoptosis regulator Bcl-2
Q9UHX3	EMR2				#DIV/0!	4	3	3	5.7	4.7	4.7	90.471	0	8.2715	95379000	5094400	90284000	4	4	1	1	Q9UHX3;Q9BY15	EGF-like module-containing mucin-like hormone receptor-like 2
Q99832	CCT7	0.577448	0.267277	0.422363	0.219324	37	37	37	69.4	69.4	69.4	59.366	0	323.31	78897000000	25518000000	53379000000	20	31	29	26	Q99832	T-complex protein 1 subunit eta
Q9UK59	DBR1	1.2703	1.36214	1.31622	0.0649407	14	14	14	34.4	34.4	34.4	61.554	0	147.01	3044400000	899430000	2145000000	10	12	10	6	Q9UK59	Lariat debranching enzyme
P62277	RPS13	-0.0862326	0.0677661	-0.00923329	0.108894	15	15	15	51.7	51.7	51.7	17.222	0	75.588	35357000000	20042000000	15315000000	8	6	11	11	P62277	40S ribosomal protein S13
P63172	DYNLT1	0.266182	0.702005	0.484094	0.308173	4	4	4	60.2	60.2	60.2	12.452	0	63.947	1811900000	814580000	997320000	1	1	4	2	P63172	Dynein light chain Tctex-type 1
P51159	RAB27A	2.33754	2.20553	2.27153	0.0933452	12	12	12	57.9	57.9	57.9	24.868	0	61.127	15191000000	3082300000	12109000000	5	10	10	8	P51159;O00194	Ras-related protein Rab-27A
Q9UMZ2	SYNRG				#DIV/0!	11	11	11	12.7	12.7	12.7	140.65	0	17.489	181720000	62026000	119700000	6	8	0	0	Q9UMZ2	Synergin gamma
P61981	YWHAG	0.633405	0.81316	0.723282	0.127106	21	15	15	84.2	69.2	69.2	28.302	0	323.31	35647000000	10441000000	25207000000	10	17	14	15	P61981	14-3-3 protein gamma;14-3-3 protein gamma, N-terminally processed
P16885	PLCG2	3.31205	3.15059	3.23132	0.114169	54	54	53	50.5	50.5	50	147.87	0	323.31	13251000000	2104500000	11146000000	36	40	36	35	P16885	1-phosphatidylinositol 4,5-bisphosphate phosphodiesterase gamma-2
P78383	SLC35B1	2.84178		2.84178	#DIV/0!	3	3	3	11.2	11.2	11.2	35.759	0	2.8969	250430000	37618000	212820000	3	2	1	1	P78383	Solute carrier family 35 member B1
Q8TBQ9	TMEM167A	1.18662	2.21236	1.69949	0.725308	4	4	4	27.8	27.8	27.8	8.0598	0	8.5761	1990200000	393140000	1597100000	4	4	3	3	Q8TBQ9	Protein kish-A
O14949	UQCRQ	0.496951	0.526871	0.511911	0.0211566	8	8	8	61	61	61	9.9062	0	57.117	6792000000	3669100000	3122900000	2	2	5	7	O14949	Cytochrome b-c1 complex subunit 8
Q15907	RAB11B	0.0147731	-0.0032193	0.00577688	0.0127225	18	18	3	78.4	78.4	25.7	24.488	0	323.31	49709000000	21150000000	28559000000	8	15	14	15	Q15907	Ras-related protein Rab-11B
Q8TB96	ITFG1	1.76837		1.76837	#DIV/0!	4	4	4	9	9	9	68.107	0	7.7078	348070000	72368000	275700000	3	4	3	1	Q8TB96	T-cell immunomodulatory protein
Q5T4S7	UBR4	-0.143257	-0.0507396	-0.0969985	0.0654197	214	214	214	47.2	47.2	47.2	573.83	0	323.31	51421000000	28896000000	22526000000	197	157	167	185	Q5T4S7	E3 ubiquitin-protein ligase UBR4
P01111	NRAS	0.568611	0.520141	0.544376	0.0342735	10	10	2	66.7	66.7	12.7	21.229	0	231.67	7958600000	2913400000	5045100000	6	8	9	8	P01111	GTPase NRas
P61619	SEC61A1	1.07222	0.990555	1.03139	0.0577459	11	11	11	29.2	29.2	29.2	52.264	0	54.495	19530000000	5257600000	14272000000	8	11	8	6	P61619;Q9H9S3	Protein transport protein Sec61 subunit alpha isoform 1
P51970	NDUFA8	-0.161183	-0.202234	-0.181708	0.0290274	12	12	12	73.3	73.3	73.3	20.105	0	73.744	6542700000	3013600000	3529100000	5	6	7	8	P51970	NADH dehydrogenase [ubiquinone] 1 alpha subcomplex subunit 8
P04222	HLA-C	1.02947		1.02947	#DIV/0!	11	6	0	38.5	21.9	0	40.86	0	29.936	724640000	125590000	599050000	2	7	10	2	P04222	HLA class I histocompatibility antigen, Cw-3 alpha chain
Q8N5M9	JAGN1	1.04297	1.00754	1.02525	0.0250528	4	4	4	17.5	17.5	17.5	21.125	0	93.961	1754200000	418930000	1335300000	2	4	3	2	Q8N5M9	Protein jagunal homolog 1
Q96AA3	RFT1	2.03102	1.6857	1.85836	0.244178	11	11	11	18.5	18.5	18.5	60.335	0	13.85	3136100000	651030000	2485100000	8	10	8	7	Q96AA3	Protein RFT1 homolog
Q8WW12	PCNP	0.289306	1.22293	0.756119	0.660172	8	8	8	56.7	56.7	56.7	18.925	0	40.987	1936800000	775450000	1161400000	1	5	5	3	Q8WW12	PEST proteolytic signal-containing nuclear protein
P62253	UBE2G1	-0.177714	-0.279169	-0.228442	0.0717395	6	6	6	37.1	37.1	37.1	19.509	0	60.546	1708400000	618290000	1090200000	4	4	5	4	P62253	Ubiquitin-conjugating enzyme E2 G1;Ubiquitin-conjugating enzyme E2 G1, N-terminally processed
P50395	GDI2	0.730327	0.665462	0.697894	0.0458665	34	34	26	77.8	77.8	60.2	50.663	0	323.31	70465000000	22472000000	47993000000	22	26	30	16	P50395	Rab GDP dissociation inhibitor beta
Q7Z7H5	TMED4	-0.199983	-0.0661674	-0.133075	0.0946219	7	6	6	37.4	30	30	25.943	0	68.418	1605200000	623460000	981690000	2	5	5	4	Q7Z7H5	Transmembrane emp24 domain-containing protein 4
Q8TCJ2	STT3B	1.75968	1.57672	1.6682	0.129372	21	20	20	25.2	24.3	24.3	93.673	0	115.69	12963000000	2831300000	10132000000	14	21	16	16	Q8TCJ2	Dolichyl-diphosphooligosaccharide--protein glycosyltransferase subunit STT3B
P06744	GPI	0.618813	0.43519	0.527002	0.129841	29	29	23	59.5	59.5	43.7	63.146	0	323.31	107950000000	30143000000	77805000000	19	23	19	14	P06744;Q8N196	Glucose-6-phosphate isomerase
Q07864	POLE	2.3467	2.09703	2.22186	0.176543	31	31	31	17.8	17.8	17.8	261.51	0	50.911	1035400000	340200000	695210000	13	7	16	15	Q07864	DNA polymerase epsilon catalytic subunit A
P43304	GPD2	1.25078	1.50137	1.37608	0.177194	28	28	28	45.9	45.9	45.9	80.852	0	293.54	12536000000	2916100000	9619900000	15	24	15	9	P43304	Glycerol-3-phosphate dehydrogenase, mitochondrial
P63279	UBE2I	-0.0472228	0.349399	0.151088	0.280454	10	10	10	56.3	56.3	56.3	18.007	0	176.25	16972000000	7439600000	9532600000	7	9	9	8	P63279	SUMO-conjugating enzyme UBC9
Q13637	RAB32	3.2924	2.98865	3.14052	0.214784	16	16	14	76.9	76.9	67.6	24.997	0	135.4	3629300000	567010000	3062300000	6	10	11	11	Q13637	Ras-related protein Rab-32
Q9BRX8	FAM213A	-0.401106	0.253714	-0.073696	0.463028	12	12	12	47.2	47.2	47.2	25.764	0	29.71	5984800000	1725100000	4259700000	4	11	8	11	Q9BRX8	Redox-regulatory protein FAM213A
Q9UBS4	DNAJB11	1.92025	1.90814	1.91419	0.00856306	13	13	13	43	43	43	40.513	0	176.49	5875700000	1355800000	4519900000	6	10	9	4	Q9UBS4	DnaJ homolog subfamily B member 11
P36222	CHI3L1	4.41897	3.43132	3.92515	0.698374	12	12	12	40.2	40.2	40.2	42.625	0	94.119	4755800000	294640000	4461200000	9	7	9	7	P36222	Chitinase-3-like protein 1
O14683	TP53I11				#DIV/0!	4	4	4	18.5	18.5	18.5	21.054	0	11.208	283370000	23734000	259640000	4	4	1	0	O14683	Tumor protein p53-inducible protein 11
O14734	ACOT8	1.85837	1.56382	1.71109	0.208278	6	6	6	22.6	22.6	22.6	35.914	0	75.718	1104300000	289300000	815000000	2	2	5	2	O14734	Acyl-coenzyme A thioesterase 8
Q16774	GUK1	-0.403596	0.0509792	-0.176308	0.321433	9	9	9	61.4	61.4	61.4	21.725	0	172.52	2155900000	1067300000	1088600000	3	5	7	8	Q16774	Guanylate kinase
Q96C23	GALM	2.05611		2.05611	#DIV/0!	6	6	6	23.7	23.7	23.7	37.765	0	32.108	414560000	100190000	314370000	2	4	4	1	Q96C23	Aldose 1-epimerase
Q9NX76	CMTM6	2.25535	2.99992	2.62764	0.52649	3	3	3	14.2	14.2	14.2	20.419	0	3.5982	901440000	103520000	797920000	2	3	2	1	Q9NX76	CKLF-like MARVEL transmembrane domain-containing protein 6
P07686	HEXB	1.03085	0.979546	1.0052	0.0362774	19	19	19	43.7	43.7	43.7	63.111	0	194.82	15226000000	3323100000	11903000000	9	15	14	13	P07686	Beta-hexosaminidase subunit beta;Beta-hexosaminidase subunit beta chain B;Beta-hexosaminidase subunit beta chain A
P13796	LCP1	1.13257	1.07754	1.10505	0.0389121	59	59	50	90.1	90.1	79.6	70.288	0	323.31	304640000000	72674000000	231970000000	41	53	41	43	P13796	Plastin-2
P60602	ROMO1	1.06871	1.17363	1.12117	0.0741896	4	4	4	59.5	59.5	59.5	8.1828	0	36.183	1696000000	292620000	1403400000	1	4	3	3	P60602	Reactive oxygen species modulator 1
Q99439	CNN2	1.47289	1.55249	1.51269	0.0562857	10	10	9	40.1	40.1	36.6	33.697	0	222.09	5093300000	1012400000	4080900000	4	9	8	5	Q99439	Calponin-2
O95104	SCAF4	0.591439	0.131545	0.361492	0.325194	16	13	13	21.1	18.8	18.8	125.87	0	247.91	3275400000	1642900000	1632500000	15	10	9	9	O95104	Splicing factor, arginine/serine-rich 15
Q9BV19	C1orf50	2.3561	1.92141	2.13876	0.307372	10	10	10	77.4	77.4	77.4	21.876	0	233.38	3453800000	643270000	2810500000	2	9	6	7	Q9BV19	Uncharacterized protein C1orf50
Q14667	KIAA0100	0.391746	0.228504	0.310125	0.11543	20	20	20	12.4	12.4	12.4	253.7	0	28.238	1283900000	595510000	688340000	9	11	5	2	Q14667	Protein KIAA0100
P15531	NME1	0.620425	0.885066	0.752746	0.187129	15	7	7	73	39.5	39.5	17.149	0	84.145	48995000000	17320000000	31675000000	6	12	11	11	P15531	Nucleoside diphosphate kinase A
P11717	IGF2R	2.46365	2.45438	2.45902	0.00655488	123	123	123	56.1	56.1	56.1	274.37	0	323.31	97813000000	15776000000	82037000000	99	106	95	97	P11717	Cation-independent mannose-6-phosphate receptor
Q96BY6	DOCK10	4.27427	2.89883	3.58655	0.972583	67	65	64	39.5	38.7	38.3	249.53	0	323.31	4283300000	441230000	3842100000	36	55	31	26	Q96BY6	Dedicator of cytokinesis protein 10
O95379	TNFAIP8	1.97045	2.86964	2.42004	0.635823	8	8	8	61.1	61.1	61.1	23.003	0	89.919	1474500000	191730000	1282800000	3	6	2	3	O95379	Tumor necrosis factor alpha-induced protein 8
Q13277	STX3	-0.315208		-0.315208	#DIV/0!	7	7	7	17	17	17	33.155	0	7.3156	457640000	168840000	288800000	1	4	4	2	Q13277	Syntaxin-3
O95881	TXNDC12	1.12006	1.52775	1.32391	0.28828	8	8	8	62.8	62.8	62.8	19.206	0	277.68	17998000000	4803500000	13194000000	5	8	5	6	O95881	Thioredoxin domain-containing protein 12
P02655	APOC2		5.09008	5.09008	#DIV/0!	5	5	5	56.4	56.4	56.4	11.284	0	8.8761	1963800000	78968000	1884800000	1	5	1	3	P02655	Apolipoprotein C-II;Proapolipoprotein C-II
P23368	ME2	1.88615	1.69689	1.79152	0.133827	26	26	26	54.6	54.6	54.6	65.443	0	317.9	7917600000	2748200000	5169300000	10	22	12	10	P23368;Q16798	NAD-dependent malic enzyme, mitochondrial
P84103	SRSF3	-0.129045	-0.409955	-0.2695	0.198633	9	8	8	43.3	43.3	43.3	19.329	0	34.354	6632200000	3315000000	3317200000	2	6	8	9	P84103	Serine/arginine-rich splicing factor 3
P11142	HSPA8	-0.132566	-0.0593383	-0.0959522	0.0517798	65	65	47	89.3	89.3	72.6	70.897	0	323.31	515900000000	195000000000	320900000000	49	56	44	38	P11142	Heat shock cognate 71 kDa protein
O95182	NDUFA7	-0.0148873	0.148857	0.0669849	0.115785	11	11	11	76.1	76.1	76.1	12.551	0	39.406	1618500000	682050000	936480000	1	7	7	6	O95182	NADH dehydrogenase [ubiquinone] 1 alpha subcomplex subunit 7
Q9BXW6	OSBPL1A	0.602875	1.15809	0.88048	0.392596	8	8	8	11.2	11.2	11.2	108.47	0	12.767	418860000	174430000	244430000	4	5	4	3	Q9BXW6	Oxysterol-binding protein-related protein 1
Q8NCG7	DAGLB	3.16568	2.10883	2.63725	0.747306	12	12	12	22.5	22.5	22.5	73.731	0	53.298	1083500000	105130000	978370000	7	10	4	6	Q8NCG7	Sn1-specific diacylglycerol lipase beta
P30046;A6NHG4	DDT;DDTL	0.561259	0.529287	0.545273	0.0226076	15	15	15	99.2	99.2	99.2	12.712	0	297.48	16587000000	5803500000	10784000000	7	8	11	13	P30046;A6NHG4	D-dopachrome decarboxylase;D-dopachrome decarboxylase-like protein
Q4J6C6	PREPL	2.38074	3.51422	2.94748	0.801491	13	13	13	30	30	30	83.926	0	118.46	1108400000	172210000	936170000	8	7	8	5	Q4J6C6	Prolyl endopeptidase-like
Q9NWV4	C1orf123	0.301318	0.47724	0.389279	0.124396	7	7	7	70	70	70	18.048	0	287.16	3738200000	1730000000	2008200000	2	3	6	6	Q9NWV4	UPF0587 protein C1orf123
P80511	S100A12				#DIV/0!	3	3	3	31.5	31.5	31.5	10.575	0	18.265	244900000	41322000	203580000	1	3	0	1	P80511	Protein S100-A12;Calcitermin
P51149	RAB7A	1.71519	1.67059	1.69289	0.031537	18	18	18	77.3	77.3	77.3	23.489	0	323.31	44562000000	10060000000	34502000000	14	18	16	17	P51149	Ras-related protein Rab-7a
P61353	RPL27	-0.164943	-0.0495631	-0.107253	0.0815859	8	8	8	50	50	50	15.798	0	37.195	17878000000	9428100000	8449900000	4	7	7	7	P61353	60S ribosomal protein L27
P37235;P84074	HPCAL1;HPCA	1.25255	1.43072	1.34164	0.125985	12	12	8	66.8	66.8	47.7	22.313	0	127.46	3689400000	786440000	2902900000	5	8	5	7	P37235;P84074	Hippocalcin-like protein 1;Neuron-specific calcium-binding protein hippocalcin
P22392	NME2	0.756085	0.842186	0.799135	0.0608826	21	21	6	90.1	90.1	32.9	17.298	0	174.98	108140000000	30328000000	77817000000	13	16	13	15	P22392	Nucleoside diphosphate kinase B
Q14315	FLNC	1.18265		1.18265	#DIV/0!	21	3	3	7.5	1.4	1.4	291.02	0	3.0051	282150000	114550000	167610000	17	18	19	19	Q14315	Filamin-C
Q9P1F3	ABRACL	1.05729	1.13329	1.09529	0.0537401	5	5	5	81.5	81.5	81.5	9.0564	0	42.703	11797000000	4215400000	7581300000	4	3	5	3	Q9P1F3	Costars family protein ABRACL
O75348	ATP6V1G1	0.875215	0.897147	0.886181	0.0155083	5	5	5	44.1	44.1	44.1	13.757	0	194.1	4576900000	1530900000	3045900000	2	5	3	4	O75348;O95670	V-type proton ATPase subunit G 1
Q9BRR6	ADPGK	2.11833	1.86832	1.99332	0.176784	17	17	17	50.7	50.7	50.7	54.088	0	323.31	7334000000	1781900000	5552100000	12	15	10	7	Q9BRR6	ADP-dependent glucokinase
P53634	CTSC	0.574278	0.117011	0.345645	0.323337	17	17	17	48.6	48.6	48.6	51.853	0	323.31	14937000000	6174000000	8763000000	8	16	12	15	P53634	Dipeptidyl peptidase 1;Dipeptidyl peptidase 1 exclusion domain chain;Dipeptidyl peptidase 1 heavy chain;Dipeptidyl peptidase 1 light chain
P10253	GAA	1.77537	1.76448	1.76992	0.00770039	18	18	18	28.5	28.5	28.5	105.32	0	152.31	4122200000	610710000	3511500000	12	17	11	6	P10253	Lysosomal alpha-glucosidase;76 kDa lysosomal alpha-glucosidase;70 kDa lysosomal alpha-glucosidase
P14866	HNRNPL	-0.353966	-0.6344	-0.494183	0.198297	23	23	22	63.8	63.8	62.6	64.132	0	323.31	43168000000	21691000000	21477000000	13	20	18	15	P14866	Heterogeneous nuclear ribonucleoprotein L
Q9Y696	CLIC4	-0.27273	-0.30947	-0.2911	0.0259791	18	18	17	75.9	75.9	72.7	28.772	0	323.31	9291000000	4868400000	4422700000	8	11	18	10	Q9Y696	Chloride intracellular channel protein 4
Q969X5	ERGIC1	1.03581	0.988421	1.01212	0.0335091	6	6	6	25.9	25.9	25.9	32.592	0	45.176	1111100000	378140000	733000000	2	1	4	2	Q969X5	Endoplasmic reticulum-Golgi intermediate compartment protein 1
Q96GA7	SDSL	2.3538	2.27863	2.31622	0.0531532	11	11	11	42.6	42.6	42.6	34.674	0	91.883	2702800000	621980000	2080800000	4	5	11	7	Q96GA7	Serine dehydratase-like
O95716	RAB3D	1.15701	1.10204	1.12952	0.0388697	7	5	3	36.5	29.7	17.4	24.267	0	36.459	1360900000	266790000	1094100000	3	6	4	6	O95716	Ras-related protein Rab-3D
P0CG39	POTEJ	0.690047		0.690047	#DIV/0!	9	1	1	11.6	2.2	2.2	117.39	0	6.1197	266200000	122850000	143350000	7	7	8	5	P0CG39	POTE ankyrin domain family member J
P36507	MAP2K2	-1.25836	-1.82506	-1.54171	0.400717	21	21	16	57	57	44	44.424	0	323.31	2964200000	1784700000	1179500000	7	7	16	4	P36507	Dual specificity mitogen-activated protein kinase kinase 2
P25786	PSMA1	0.437326	0.189956	0.313641	0.174917	24	24	24	88.6	88.6	88.6	29.555	0	323.31	39367000000	13294000000	26073000000	6	20	17	14	P25786	Proteasome subunit alpha type-1
Q9NQ50	MRPL40	0.169076	0.288967	0.229022	0.0847757	8	8	8	37.9	37.9	37.9	24.49	0	52.048	1263100000	639820000	623300000	1	2	6	6	Q9NQ50	39S ribosomal protein L40, mitochondrial
O75083	WDR1	0.637532	0.426936	0.532234	0.148914	32	32	32	71.6	71.6	71.6	66.193	0	323.31	42801000000	12852000000	29949000000	19	28	28	22	O75083	WD repeat-containing protein 1
P22732	SLC2A5	3.74699		3.74699	#DIV/0!	5	5	5	10.6	10.6	10.6	54.973	0	14.922	2165800000	1208800000	957040000	4	5	3	3	P22732	Solute carrier family 2, facilitated glucose transporter member 5
Q07960	ARHGAP1	1.32435	1.35669	1.34052	0.0228678	24	24	24	72.7	72.7	72.7	50.435	0	323.31	12980000000	3344100000	9635400000	13	19	17	8	Q07960	Rho GTPase-activating protein 1
P41567	EIF1	0.453834	0.527677	0.490756	0.0522149	13	13	8	89.4	89.4	53.1	12.732	0	323.31	14779000000	7901400000	6877800000	6	7	9	12	P41567	Eukaryotic translation initiation factor 1
Q9H0V9	LMAN2L	1.48689	1.90855	1.69772	0.298159	7	7	7	27.6	27.6	27.6	39.71	0	137.2	2749700000	516240000	2233500000	3	7	4	2	Q9H0V9	VIP36-like protein
P49756	RBM25	-0.34508	-0.368226	-0.356653	0.0163667	30	30	30	33.6	33.6	33.6	100.18	0	323.31	12995000000	7046200000	5949200000	19	24	12	20	P49756	RNA-binding protein 25
O15427	SLC16A3	3.10919	3.66222	3.3857	0.391051	14	14	14	30.1	30.1	30.1	49.469	0	87.439	11219000000	1709600000	9509500000	10	13	9	9	O15427	Monocarboxylate transporter 4
P14598;A6NI72;A8MVU1	NCF1;NCF1B;NCF1C		4.24641	4.24641	#DIV/0!	10	10	10	32.1	32.1	32.1	44.681	0	87.46	1096600000	97408000	999220000	4	9	5	3	P14598;A6NI72;A8MVU1	Neutrophil cytosol factor 1;Putative neutrophil cytosol factor 1B;Putative neutrophil cytosol factor 1C
P49903	SEPHS1	0.449537	0.555636	0.502586	0.0750233	13	13	13	56.6	56.6	56.6	42.91	0	192.48	4740100000	1499700000	3240400000	5	12	8	6	P49903	Selenide, water dikinase 1
Q9NRW7	VPS45	1.03613	1.03021	1.03317	0.00418607	13	13	13	22.6	22.6	22.6	65.076	0	27.868	1654300000	500600000	1153700000	6	10	7	6	Q9NRW7	Vacuolar protein sorting-associated protein 45
P61106	RAB14	0.575933	0.526468	0.5512	0.034977	18	18	18	86.5	86.5	86.5	23.897	0	323.31	23584000000	7338800000	16245000000	10	14	15	15	P61106	Ras-related protein Rab-14
Q04917	YWHAH	0.30987	0.307313	0.308592	0.00180807	17	12	12	67.9	52.4	52.4	28.218	0	297.81	11502000000	4003800000	7498700000	6	11	15	14	Q04917	14-3-3 protein eta
Q12907	LMAN2	2.92066	3.07374	2.9972	0.108244	17	17	17	60.7	60.7	60.7	40.228	0	323.31	31913000000	4600200000	27313000000	10	15	14	7	Q12907	Vesicular integral-membrane protein VIP36
Q15084	PDIA6	1.9504	1.97427	1.96233	0.0168786	25	25	25	61.6	61.6	61.6	48.121	0	323.31	140830000000	25752000000	115080000000	18	22	16	16	Q15084	Protein disulfide-isomerase A6
P35754	GLRX	1.04999	1.10498	1.07749	0.0388838	6	6	6	55.7	55.7	55.7	11.776	0	79.121	2542600000	934210000	1608400000	3	5	6	6	P35754	Glutaredoxin-1
Q04446	GBE1	0.243244	0.287106	0.265175	0.0310151	38	38	38	63.2	63.2	63.2	80.473	0	323.31	51614000000	16099000000	35515000000	23	30	22	23	Q04446	1,4-alpha-glucan-branching enzyme
Q9BUF5	TUBB6	3.47832	3.01091	3.24462	0.330509	21	11	10	62.8	35.2	33.2	49.857	0	323.31	15230000000	4373300000	10857000000	15	17	21	16	Q9BUF5	Tubulin beta-6 chain
Q9NP97	DYNLRB1	0.581025	0.650941	0.615983	0.0494381	12	12	12	94.8	94.8	94.8	10.921	0	91.921	10509000000	4202200000	6307000000	5	8	9	11	Q9NP97;Q8TF09	Dynein light chain roadblock-type 1
P06865	HEXA	1.33873	1.86796	1.60334	0.374222	13	13	13	33.6	33.6	33.6	60.702	0	124.75	8930000000	1969300000	6960600000	9	11	9	8	P06865	Beta-hexosaminidase subunit alpha
Q99471	PFDN5	0.684362	0.993398	0.83888	0.218521	7	7	7	53.2	53.2	53.2	17.328	0	133.58	7221000000	2624000000	4597000000	4	6	5	6	Q99471	Prefoldin subunit 5
P51617	IRAK1	0.348072	0.405687	0.376879	0.04074	7	7	7	19.2	19.2	19.2	76.536	0	31.053	318370000	68813000	249560000	5	4	4	1	P51617	Interleukin-1 receptor-associated kinase 1
P62495	ETF1	0.12544	0.153657	0.139549	0.0199524	18	18	18	52.6	52.6	52.6	49.03	0	280.19	10037000000	3759600000	6277100000	12	10	10	8	P62495	Eukaryotic peptide chain release factor subunit 1
P23284	PPIB	2.10701	2.23748	2.17225	0.0922562	25	25	25	68.1	68.1	68.1	23.742	0	176.01	105180000000	20001000000	85182000000	8	23	16	19	P23284	Peptidyl-prolyl cis-trans isomerase B
Q96HJ9	C7orf55	-0.0700836	0.389277	0.159597	0.324817	6	6	6	37.2	37.2	37.2	12.749	0	10.627	196330000	63425000	132910000	0	4	3	3	Q96HJ9	UPF0562 protein C7orf55
Q15942	ZYX	1.75649	1.79066	1.77358	0.0241618	21	21	21	46.5	46.5	46.5	61.277	0	323.31	10263000000	1702700000	8559800000	10	20	7	11	Q15942	Zyxin
P14927	UQCRB	0.497816	0.302246	0.400031	0.138289	12	12	12	65.8	65.8	65.8	13.53	0	134.69	12976000000	4688900000	8287600000	2	9	7	10	P14927	Cytochrome b-c1 complex subunit 7
O75380	NDUFS6	0.0816213	-0.0135965	0.0340124	0.0673292	8	8	8	61.3	61.3	61.3	13.711	0	274.1	2955900000	1506100000	1449800000	2	5	8	6	O75380	NADH dehydrogenase [ubiquinone] iron-sulfur protein 6, mitochondrial
Q6P9B6	TLDC1				#DIV/0!	4	4	4	14.3	14.3	14.3	50.993	0	11.839	651900000	299620000	352280000	4	2	0	1	Q6P9B6	TLD domain-containing protein 1
Q06210	GFPT1	2.54349	2.46792	2.5057	0.0534361	32	32	32	57.7	57.7	57.7	78.806	0	323.31	5638300000	677670000	4960600000	11	24	15	7	Q06210;O94808	Glutamine--fructose-6-phosphate aminotransferase [isomerizing] 1
Q03169	TNFAIP2	2.49755		2.49755	#DIV/0!	16	16	16	33.3	33.3	33.3	72.66	0	74.521	659890000	96960000	562930000	4	12	6	3	Q03169	Tumor necrosis factor alpha-induced protein 2
Q9NRN9	METTL5	0.603011	1.13673	0.869871	0.377396	5	5	5	18.7	18.7	18.7	23.719	0	5.9974	652790000	145590000	507200000	2	5	3	2	Q9NRN9	Methyltransferase-like protein 5
Q96A26	FAM162A	0.51818	0.62278	0.57048	0.0739634	8	8	8	33.1	33.1	33.1	17.342	0	129.52	8418800000	1693900000	6724800000	3	7	2	5	Q96A26	Protein FAM162A
P61604	HSPE1	1.22321	1.26109	1.24215	0.0267852	27	27	27	99	99	99	10.932	0	211.68	256060000000	70254000000	185810000000	13	24	23	24	P61604	10 kDa heat shock protein, mitochondrial
O14818	PSMA7	0.220844	0.398591	0.309717	0.125686	18	18	18	70.2	70.2	70.2	27.887	0	323.31	52353000000	19513000000	32839000000	12	15	16	14	O14818;Q8TAA3	Proteasome subunit alpha type-7
P33897	ABCD1				#DIV/0!	7	7	7	14.8	14.8	14.8	82.936	0	21.239	234360000	65893000	168460000	4	3	1	0	P33897	ATP-binding cassette sub-family D member 1
Q9UI09	NDUFA12	-0.21086	0.19308	-0.00889009	0.285629	8	8	8	62.8	62.8	62.8	17.114	0	58.925	3968200000	1526900000	2441200000	3	7	5	7	Q9UI09	NADH dehydrogenase [ubiquinone] 1 alpha subcomplex subunit 12
P19784	CSNK2A2	0.163949	0.0646281	0.114289	0.0702305	10	10	10	34.3	34.3	34.3	41.213	0	147.2	3016200000	1319200000	1696900000	6	7	6	6	P19784	Casein kinase II subunit alpha
Q7Z7A4	PXK	3.46001	3.05116	3.25558	0.289101	15	15	15	27	27	27	64.949	0	107.83	2874600000	836740000	2037900000	8	11	6	6	Q7Z7A4;Q96I76	PX domain-containing protein kinase-like protein
P00558	PGK1	0.434784	0.488826	0.461805	0.0382135	42	42	42	84.7	84.7	84.7	44.614	0	323.31	198080000000	63928000000	134150000000	26	38	32	23	P00558;P07205	Phosphoglycerate kinase 1
Q9P0L0	VAPA	0.0170846	-0.158445	-0.0706802	0.124118	17	17	16	72.3	72.3	72.3	27.893	0	193.8	20409000000	8338900000	12070000000	7	14	12	15	Q9P0L0	Vesicle-associated membrane protein-associated protein A
O14880	MGST3	2.00635	2.43377	2.22006	0.302232	5	5	5	34.2	34.2	34.2	16.516	0	43.699	7048000000	1334800000	5713300000	2	5	3	2	O14880	Microsomal glutathione S-transferase 3
P10586	PTPRF	2.26444	1.83835	2.0514	0.301291	50	50	48	38.5	38.5	37.4	212.88	0	323.31	3676800000	455020000	3221800000	30	40	10	13	P10586;P23468	Receptor-type tyrosine-protein phosphatase F
P54819	AK2	0.928339	0.929925	0.929132	0.00112147	22	22	22	79.1	79.1	79.1	26.477	0	323.31	88094000000	27392000000	60702000000	11	14	21	16	P54819	Adenylate kinase 2, mitochondrial;Adenylate kinase 2, mitochondrial, N-terminally processed
Q96IX5	USMG5	0.661828	0.837625	0.749727	0.124307	5	5	5	44.8	44.8	44.8	6.4575	0	101.21	14570000000	5028700000	9541400000	3	5	4	5	Q96IX5	Up-regulated during skeletal muscle growth protein 5
P62263	RPS14	0.265687	0.467941	0.366814	0.143015	10	10	10	67.5	67.5	67.5	16.273	0	164.52	24621000000	10692000000	13929000000	6	9	8	7	P62263	40S ribosomal protein S14
Q9UNF1	MAGED2	2.27922	1.96277	2.12099	0.223764	13	13	13	29.4	29.4	29.4	64.953	0	126	1086700000	188120000	898560000	7	8	6	4	Q9UNF1;Q12816	Melanoma-associated antigen D2
P62330	ARF6	-0.248943	-0.0436328	-0.146288	0.145176	8	8	8	49.1	49.1	49.1	20.082	0	111.01	7944200000	3132100000	4812100000	5	6	6	7	P62330	ADP-ribosylation factor 6
Q15691	MAPRE1	1.45018	1.48998	1.47008	0.0281428	18	18	16	75.7	75.7	73.5	29.999	0	323.31	20096000000	5342600000	14753000000	6	17	14	11	Q15691	Microtubule-associated protein RP/EB family member 1
Q9HAB8	PPCS	2.05477	2.15446	2.10462	0.0704915	17	17	17	40.8	40.8	40.8	34.005	0	156.92	8343100000	1445100000	6898000000	5	10	15	8	Q9HAB8	Phosphopantothenate--cysteine ligase
Q9UKR5	C14orf1	0.0479415	-0.238266	-0.0951622	0.202379	4	4	4	30	30	30	15.864	0	10.353	1499300000	474470000	1024800000	0	4	2	2	Q9UKR5	Probable ergosterol biosynthetic protein 28
P06733	ENO1	-0.396364	-0.22565	-0.311007	0.120713	40	40	36	83.2	83.2	77.6	47.168	0	323.31	507510000000	202190000000	305320000000	28	37	30	27	P06733	Alpha-enolase
Q9H488	POFUT1	1.87849	1.32859	1.60354	0.388838	9	9	9	34.5	34.5	34.5	43.955	0	98.644	2879900000	626220000	2253700000	4	6	4	1	Q9H488	GDP-fucose protein O-fucosyltransferase 1
Q08426	EHHADH	1.85831	2.17624	2.01727	0.22481	28	28	28	52.1	52.1	52.1	79.494	0	198.27	5873200000	1161800000	4711400000	18	23	10	6	Q08426	Peroxisomal bifunctional enzyme;Enoyl-CoA hydratase/3,2-trans-enoyl-CoA isomerase;3-hydroxyacyl-CoA dehydrogenase
P18887	XRCC1	0.326688	0.33393	0.330309	0.00512087	11	11	11	20.5	20.5	20.5	69.476	0	39.545	886970000	384030000	502940000	6	8	5	2	P18887	DNA repair protein XRCC1
P13807	GYS1	0.696483	0.553522	0.625003	0.101089	22	22	22	36.1	36.1	36.1	83.785	0	323.31	3335800000	904610000	2431200000	10	20	5	5	P13807	Glycogen [starch] synthase, muscle
P11021	HSPA5	1.25153	1.35188	1.3017	0.0709582	56	55	55	66.8	66.8	66.8	72.332	0	323.31	301070000000	57190000000	243880000000	32	51	25	28	P11021	78 kDa glucose-regulated protein
P23743	DGKA				#DIV/0!	3	3	3	6.5	6.5	6.5	82.629	0	7.4675	155770000	39103000	116660000	2	2	0	1	P23743	Diacylglycerol kinase alpha
P61163	ACTR1A	-0.236525	-0.329624	-0.283074	0.0658309	13	13	8	41.8	41.8	27.4	42.613	0	323.31	6430100000	2896500000	3533600000	5	6	11	5	P61163	Alpha-centractin
Q14814	MEF2D	2.41521	2.11204	2.26363	0.214374	11	11	9	24.8	24.8	20.5	55.937	0	61.116	1309700000	129920000	1179800000	4	10	4	2	Q14814	Myocyte-specific enhancer factor 2D
P17987	TCP1	0.643241	0.470166	0.556704	0.122383	40	40	40	83.3	83.3	83.3	60.343	0	323.31	87667000000	29147000000	58520000000	21	32	34	25	P17987	T-complex protein 1 subunit alpha
Q9BV40	VAMP8	3.19016	3.47765	3.3339	0.203286	5	5	5	41	41	41	11.438	0	60.286	6286700000	696480000	5590200000	0	5	4	4	Q9BV40	Vesicle-associated membrane protein 8
Q9Y3D7	PAM16	1.3264	1.33553	1.33096	0.00645588	5	5	5	52	52	52	13.825	0	256.82	5574000000	1508100000	4065900000	3	4	5	4	Q9Y3D7	Mitochondrial import inner membrane translocase subunit TIM16
P63218	GNG5	0.21541	0.638428	0.426919	0.299119	10	10	10	91.2	91.2	91.2	7.3184	0	48.547	5719300000	1609100000	4110200000	3	7	3	7	P63218	Guanine nucleotide-binding protein G(I)/G(S)/G(O) subunit gamma-5
Q04837	SSBP1	0.986609	0.979342	0.982975	0.00513854	11	11	11	67.6	67.6	67.6	17.259	0	320.54	25952000000	8836600000	17115000000	7	10	8	9	Q04837	Single-stranded DNA-binding protein, mitochondrial
A6NHR9	SMCHD1	0.637399	0.398301	0.51785	0.169068	96	96	96	54.6	54.6	54.6	226.37	0	323.31	17233000000	7924300000	9309100000	61	62	62	64	A6NHR9	Structural maintenance of chromosomes flexible hinge domain-containing protein 1
Q99698	LYST	1.88904	2.84322	2.36613	0.674707	89	89	89	31.6	31.6	31.6	429.13	0	271.05	2350500000	223640000	2126800000	47	76	29	32	Q99698	Lysosomal-trafficking regulator
P50150	GNG4				#DIV/0!	2	2	2	44	44	44	8.3887	0	4.0662	82413000	5134400	77279000	0	2	0	2	P50150	Guanine nucleotide-binding protein G(I)/G(S)/G(O) subunit gamma-4
Q9NR31	SAR1A	1.40988	1.56806	1.48897	0.11185	14	14	9	66.7	66.7	51	22.367	0	103.17	13723000000	3801600000	9921000000	5	10	9	9	Q9NR31	GTP-binding protein SAR1a
Q9BX68	HINT2	1.41901	1.46749	1.44325	0.0342805	8	8	8	62	62	62	17.162	0	140.82	9141800000	2663100000	6478700000	5	7	6	6	Q9BX68	Histidine triad nucleotide-binding protein 2, mitochondrial
Q9BRT8;Q8IUF1;Q5RIA9;Q5JTY5;Q4V339	CBWD1;CBWD2;CBWD5;CBWD3;CBWD6	1.9666	2.21601	2.0913	0.17636	10	10	10	35.4	35.4	35.4	44.068	0	136.75	1593900000	422760000	1171200000	6	2	9	3	Q9BRT8;Q8IUF1;Q5RIA9;Q5JTY5;Q4V339	COBW domain-containing protein 1;COBW domain-containing protein 2;COBW domain-containing protein 5;COBW domain-containing protein 3;COBW domain-containing protein 6
Q99547	MPHOSPH6	-1.19354	-0.366791	-0.780163	0.5846	3	3	3	21.2	21.2	21.2	19.024	0	4.7655	260900000	136290000	124610000	0	2	1	2	Q99547	M-phase phosphoprotein 6
Q09028	RBBP4	0.167153	0.150897	0.159025	0.0114947	18	18	12	66.8	66.8	56.7	47.655	0	323.31	39359000000	17559000000	21800000000	11	11	14	10	Q09028	Histone-binding protein RBBP4
P30566	ADSL	0.298566	0.194886	0.246726	0.0733128	16	16	16	49.4	49.4	49.4	54.889	0	323.31	17273000000	6988000000	10285000000	9	13	13	14	P30566	Adenylosuccinate lyase
Q16610	ECM1				#DIV/0!	8	8	8	21.1	21.1	21.1	60.673	0	22.368	302150000	30856000	271290000	3	7	3	0	Q16610	Extracellular matrix protein 1
O75976	CPD	3.56406	3.33901	3.45154	0.159134	45	45	45	42.2	42.2	42.2	152.93	0	323.31	12242000000	1671400000	10570000000	27	31	34	32	O75976	Carboxypeptidase D
Q14141	2006-09-01	1.07655	0.288502	0.682526	0.557234	13	13	8	42.9	42.9	30.6	49.716	0	323.31	3166600000	1027600000	2139000000	4	10	8	5	Q14141	Septin-6
P29762	CRABP1	3.78928	5.30775	4.54851	1.07372	12	12	12	84.7	84.7	84.7	15.565	0	175.92	5231300000	315000000	4916300000	2	9	7	11	P29762;P29373	Cellular retinoic acid-binding protein 1
Q96E22	NUS1	0.998072		0.998072	#DIV/0!	3	3	3	18.4	18.4	18.4	33.224	0	4.7966	236730000	63406000	173320000	2	2	2	0	Q96E22	Dehydrodolichyl diphosphate syntase complex subunit NUS1
Q68CZ2	TNS3				#DIV/0!	12	12	11	14.7	14.7	13.8	155.26	0	52.021	230070000	52757000	177320000	7	7	2	0	Q68CZ2	Tensin-3
Q92619	HMHA1	1.45424	1.70715	1.58069	0.178834	40	40	40	37.1	37.1	37.1	124.61	0	323.31	11393000000	2549900000	8843500000	24	32	21	27	Q92619	Minor histocompatibility protein HA-1;Minor histocompatibility antigen HA-1
O15144	ARPC2	1.84993	1.65738	1.75365	0.136153	28	28	28	80.7	80.7	80.7	34.333	0	323.31	27759000000	5544200000	22215000000	12	17	20	12	O15144	Actin-related protein 2/3 complex subunit 2
Q16775	HAGH	-0.700789		-0.700789	#DIV/0!	8	8	8	40.6	40.6	40.6	33.805	0	30.387	998160000	513430000	484720000	0	5	7	2	Q16775	Hydroxyacylglutathione hydrolase, mitochondrial
Q92581	SLC9A6	0.333052	0.751077	0.542065	0.295588	3	3	3	4.5	4.5	4.5	74.161	0.00085383	2.6492	1575200000	563330000	1011900000	3	1	2	1	Q92581	Sodium/hydrogen exchanger 6
Q8IYS1	PM20D2	3.68583		3.68583	#DIV/0!	9	9	9	28.7	28.7	28.7	47.776	0	39.495	1491000000	454090000	1036900000	4	4	5	1	Q8IYS1	Peptidase M20 domain-containing protein 2
O75947	ATP5H	0.689273	0.991165	0.840219	0.21347	15	15	15	81.4	81.4	81.4	18.491	0	146.65	19842000000	7558600000	12284000000	5	12	12	14	O75947	ATP synthase subunit d, mitochondrial
Q9Y383	LUC7L2	-0.305226	-0.653123	-0.479175	0.246	10	10	6	26.3	26.3	16.6	46.513	0	48.609	4396900000	2131300000	2265600000	5	6	10	5	Q9Y383	Putative RNA-binding protein Luc7-like 2
P48047	ATP5O	0.782562	0.74767	0.765116	0.0246724	15	15	15	69	69	69	23.277	0	284.84	32723000000	12199000000	20524000000	6	11	9	14	P48047	ATP synthase subunit O, mitochondrial
Q00535	CDK5	1.00141	1.11161	1.05651	0.0779232	12	11	11	49.7	46.9	46.9	33.304	0	30.11	1609500000	457260000	1152200000	5	11	12	4	Q00535	Cyclin-dependent-like kinase 5
Q86VV8	RTTN	0.366703		0.366703	#DIV/0!	9	9	9	4.9	4.9	4.9	248.63	0	9.6595	462270000	228880000	233380000	5	8	5	1	Q86VV8	Rotatin
Q9UKY7	CDV3	0.727427	0.828241	0.777834	0.0712863	13	13	13	72.1	72.1	72.1	27.335	0	323.31	3944100000	1437600000	2506600000	2	6	13	5	Q9UKY7	Protein CDV3 homolog
P83876	TXNL4A	0.169076	0.750373	0.459724	0.411039	5	5	5	38.7	38.7	38.7	16.786	0	110.7	738960000	341150000	397800000	2	5	3	3	P83876	Thioredoxin-like protein 4A
Q15363	TMED2	0.196583	0.648196	0.422389	0.319339	5	5	5	30.8	30.8	30.8	22.761	0	51.186	8415400000	2246800000	6168600000	3	5	5	4	Q15363	Transmembrane emp24 domain-containing protein 2
Q9NZ08	ERAP1	2.41058	2.21226	2.31142	0.140233	41	41	41	50.4	50.4	50.4	107.23	0	323.31	22581000000	4604200000	17976000000	30	37	30	29	Q9NZ08	Endoplasmic reticulum aminopeptidase 1
Q14847	LASP1	1.02873	0.99664	1.01269	0.0226911	15	15	15	49	49	49	29.717	0	111.43	5171500000	1708100000	3463400000	3	11	14	9	Q14847	LIM and SH3 domain protein 1
O15126	SCAMP1	1.83649	1.58796	1.71222	0.175737	7	7	7	37.3	37.3	37.3	37.92	0	323.31	2677500000	392270000	2285300000	3	5	5	1	O15126	Secretory carrier-associated membrane protein 1
Q14696	MESDC2	-0.189506	-0.174154	-0.18183	0.0108555	12	12	12	49.6	49.6	49.6	26.076	0	323.31	10450000000	4414400000	6035400000	5	10	11	8	Q14696	LDLR chaperone MESD
O43426	SYNJ1	2.014		2.014	#DIV/0!	8	8	8	6.9	6.9	6.9	173.1	0	13.43	75488000	19195000	56292000	3	5	4	0	O43426	Synaptojanin-1
Q9HA64	FN3KRP	-0.124627	0.0594917	-0.0325677	0.130192	11	11	11	37.5	37.5	37.5	34.412	0	49.805	2187500000	888070000	1299500000	2	6	6	5	Q9HA64	Ketosamine-3-kinase
Q9BV10	ALG12				#DIV/0!	4	4	4	16.2	16.2	16.2	54.654	0	10.579	71875000	18077000	53797000	3	2	1	0	Q9BV10	Dol-P-Man:Man(7)GlcNAc(2)-PP-Dol alpha-1,6-mannosyltransferase
P61758	VBP1	0.593213	0.816435	0.704824	0.157842	14	14	14	51.8	51.8	51.8	22.658	0	102.32	7664800000	2307500000	5357300000	5	12	7	11	P61758	Prefoldin subunit 3
P27824	CANX	1.53067	1.34253	1.4366	0.133035	46	46	45	61.5	61.5	59.5	67.567	0	323.31	181560000000	41533000000	140030000000	36	41	29	24	P27824	Calnexin
Q15428	SF3A2	-0.159931	-0.382234	-0.271082	0.157192	11	11	11	26.5	26.5	26.5	49.255	0	124.85	6949300000	3200200000	3749100000	4	8	7	10	Q15428	Splicing factor 3A subunit 2
P09497	CLTB	1.03655		1.03655	#DIV/0!	8	8	8	24.9	24.9	24.9	25.19	0	28.273	831060000	181410000	649650000	0	5	6	0	P09497	Clathrin light chain B
Q9Y487	ATP6V0A2				#DIV/0!	8	7	7	13.3	12.4	12.4	98.081	0	48.262	332120000	92213000	239910000	5	4	2	1	Q9Y487	V-type proton ATPase 116 kDa subunit a isoform 2
Q96DE0	NUDT16	1.39309	1.53779	1.46544	0.102318	8	8	8	44.6	44.6	44.6	21.273	0	51.694	1036600000	270420000	766140000	2	6	3	5	Q96DE0	U8 snoRNA-decapping enzyme
Q93084	ATP2A3	-1.76187	-1.63697	-1.69942	0.0883176	21	13	12	22.5	15	15	113.98	0	35.756	1763000000	1050300000	712660000	14	11	17	10	Q93084	Sarcoplasmic/endoplasmic reticulum calcium ATPase 3
P50552	VASP	0.209106	0.307926	0.258516	0.0698763	19	19	19	42.1	42.1	42.1	39.829	0	126.5	12406000000	4600100000	7805600000	3	16	12	9	P50552	Vasodilator-stimulated phosphoprotein
Q9NTK5	OLA1	1.15632	1.16267	1.1595	0.00449013	26	26	26	81.6	81.6	81.6	44.743	0	323.31	22982000000	7502900000	15479000000	12	14	18	9	Q9NTK5	Obg-like ATPase 1
O95563	MPC2	0.587199	0.547828	0.567513	0.0278395	7	7	7	57.5	57.5	57.5	14.279	0	54.113	8468400000	2696400000	5772100000	6	7	7	3	O95563	Mitochondrial pyruvate carrier 2
O00443	PIK3C2A	3.02352		3.02352	#DIV/0!	9	9	9	6.2	6.2	6.2	190.68	0	9.9549	204910000	36042000	168870000	4	6	2	2	O00443	Phosphatidylinositol 4-phosphate 3-kinase C2 domain-containing subunit alpha
P31948	STIP1	-0.843347	-0.850108	-0.846728	0.00478075	48	48	48	60.4	60.4	60.4	62.639	0	323.31	70262000000	35504000000	34759000000	27	33	30	33	P31948	Stress-induced-phosphoprotein 1
Q96BM9	ARL8A	-1.86111	-0.990724	-1.42592	0.615456	12	5	5	71	30.6	30.6	21.416	0	12.098	393840000	189520000	204320000	8	10	9	8	Q96BM9	ADP-ribosylation factor-like protein 8A
Q6S8J3	POTEE	0.573174		0.573174	#DIV/0!	13	2	0	13.7	4.3	0	121.36	0	30.701	28086000000	12045000000	16041000000	11	11	12	9	Q6S8J3;Q9BYX7	POTE ankyrin domain family member E
P61916	NPC2	-1.1451	-0.762794	-0.953947	0.270331	8	8	8	56.3	56.3	56.3	16.57	0	71.32	7514300000	3370800000	4143600000	3	5	4	7	P61916	Epididymal secretory protein E1
P63173	RPL38	0.0607002	0.0977803	0.0792403	0.0262196	8	8	8	57.1	57.1	57.1	8.2178	0	56.257	36464000000	18448000000	18016000000	6	6	7	8	P63173	60S ribosomal protein L38
P25789	PSMA4	0.54982	0.327581	0.438701	0.157147	13	13	13	70.1	70.1	70.1	29.483	0	323.31	19346000000	6648700000	12697000000	5	12	8	7	P25789	Proteasome subunit alpha type-4
P51571	SSR4	0.477792	0.6149	0.546346	0.09695	5	5	5	36.4	36.4	36.4	18.998	0	73.914	24934000000	7344600000	17589000000	3	5	5	5	P51571	Translocon-associated protein subunit delta
P51452	DUSP3	0.998396	1.44415	1.22127	0.315196	10	10	10	61.6	61.6	61.6	20.478	0	148.3	3248200000	896900000	2351300000	5	6	8	3	P51452	Dual specificity protein phosphatase 3
P59998	ARPC4	1.74697	1.82236	1.78467	0.0533088	12	12	12	74.4	74.4	74.4	19.667	0	228.97	49723000000	11971000000	37751000000	8	11	11	10	P59998	Actin-related protein 2/3 complex subunit 4
P12694	BCKDHA	-0.848311	-0.596265	-0.722288	0.178223	14	14	14	45.2	45.2	45.2	50.47	0	281.13	1315700000	682010000	633660000	2	4	10	3	P12694	2-oxoisovalerate dehydrogenase subunit alpha, mitochondrial
Q9BT09	CNPY3	1.37311	1.83768	1.60539	0.328501	10	10	10	38.1	38.1	38.1	30.748	0	313.42	4916300000	593240000	4323000000	2	9	4	1	Q9BT09	Protein canopy homolog 3
P01892	HLA-A	4.35281	3.29053	3.82167	0.751145	19	19	1	57.3	57.3	4.9	40.921	0	323.31	12085000000	1284100000	10801000000	4	16	10	6	P01892;P30511	HLA class I histocompatibility antigen, A-2 alpha chain
P61960	UFM1	0.0376356	0.133777	0.0857062	0.0679822	11	11	11	91.8	91.8	91.8	9.1175	0	166.55	8211600000	3529000000	4682600000	3	7	9	6	P61960	Ubiquitin-fold modifier 1
Q9BT22	ALG1	-0.438482	2.12748	0.844499	1.81441	2	2	2	6.5	6.5	6.5	52.518	0	11.885	267630000	120800000	146830000	1	1	2	1	Q9BT22	Chitobiosyldiphosphodolichol beta-mannosyltransferase
Q12834	CDC20	3.00095		3.00095	#DIV/0!	8	8	8	32.7	32.7	32.7	54.722	0	120.51	641150000	168750000	472390000	6	4	1	1	Q12834	Cell division cycle protein 20 homolog
P41223	BUD31	0.431938	0.442414	0.437176	0.00740765	8	8	8	39.6	39.6	39.6	17	0	82.245	3165700000	1563100000	1602600000	7	4	6	7	P41223	Protein BUD31 homolog
P56381;Q5VTU8	ATP5E;ATP5EP2	0.789271	0.749315	0.769293	0.0282532	6	6	6	74.5	74.5	74.5	5.7797	0.0010045	2.2147	6911700000	2602400000	4309300000	0	6	3	3	P56381;Q5VTU8	ATP synthase subunit epsilon, mitochondrial;ATP synthase subunit epsilon-like protein, mitochondrial
O15511	ARPC5	2.13458	1.4112	1.77289	0.511507	9	9	8	62.3	62.3	57	16.32	0	81.565	9795500000	1665400000	8130100000	1	8	5	5	O15511	Actin-related protein 2/3 complex subunit 5
Q15125	EBP	0.54758	0.963308	0.755444	0.293964	3	3	3	16.5	16.5	16.5	26.352	0	89.318	6044300000	1354500000	4689800000	3	3	3	3	Q15125	3-beta-hydroxysteroid-Delta(8),Delta(7)-isomerase
P22090	RPS4Y1	0.144936	-0.14576	-0.000412203	0.205553	21	12	7	70.7	46	31.2	29.455	0	162.55	6603000000	3440900000	3162100000	8	11	17	14	P22090	40S ribosomal protein S4, Y isoform 1
P15498	VAV1	0.484638	0.338751	0.411695	0.103158	25	25	24	36	36	34.8	98.313	0	323.31	5053300000	2015500000	3037800000	13	13	11	13	P15498	Proto-oncogene vav
Q92575	UBXN4	0.602875	0.549419	0.576147	0.0377991	7	7	7	22.4	22.4	22.4	56.777	0	29.579	469040000	154270000	314770000	2	4	5	2	Q92575	UBX domain-containing protein 4
P48960	CD97	1.76527	1.10375	1.43451	0.467765	13	13	12	19.8	19.8	18.8	91.868	0	253.72	4020100000	615070000	3405000000	11	12	6	4	P48960	CD97 antigen;CD97 antigen subunit alpha;CD97 antigen subunit beta
P08311	CTSG	4.75672	4.28037	4.51855	0.33683	6	6	6	30.6	30.6	30.6	28.837	0	33.654	1887100000	198630000	1688400000	2	5	4	6	P08311	Cathepsin G
Q8NBM8	PCYOX1L	1.76444	1.75566	1.76005	0.0062084	11	11	11	27.1	27.1	27.1	54.646	0	59.629	7527900000	1316200000	6211700000	3	10	4	3	Q8NBM8	Prenylcysteine oxidase-like
Q02809	PLOD1	-0.00570039	-0.0865927	-0.0461465	0.0571995	34	34	34	54.1	54.1	54.1	83.549	0	323.31	13758000000	3854200000	9904100000	26	27	10	12	Q02809	Procollagen-lysine,2-oxoglutarate 5-dioxygenase 1
O43493	TGOLN2	2.5534	3.25566	2.90453	0.496573	5	5	5	14	14	14	51.018	0	70.741	541090000	109040000	432050000	3	5	5	4	O43493	Trans-Golgi network integral membrane protein 2
P01024	C3				#DIV/0!	23	23	20	17.7	17.7	16.1	187.15	0	108.06	544690000	140190000	404500000	13	19	0	0	P01024	Complement C3;Complement C3 beta chain;C3-beta-c;Complement C3 alpha chain;C3a anaphylatoxin;Acylation stimulating protein;Complement C3b alpha chain;Complement C3c alpha chain fragment 1;Complement C3dg fragment;Complement C3g fragment;Complement C3d fragment;Complement C3f fragment;Complement C3c alpha chain fragment 2
P11166	SLC2A1	-0.373925	-0.374099	-0.374012	0.000123037	9	9	9	14.4	14.4	14.4	54.083	0	323.31	29017000000	8563500000	20454000000	7	9	7	6	P11166	Solute carrier family 2, facilitated glucose transporter member 1
Q9H3G5	CPVL	1.00141	1.49696	1.24918	0.350407	5	5	5	12.8	12.8	12.8	54.163	0	10.992	1091600000	294960000	796670000	2	2	4	4	Q9H3G5	Probable serine carboxypeptidase CPVL
Q9H0U3	MAGT1	1.24547	1.27382	1.25964	0.0200465	7	7	7	21.2	21.2	21.2	38.036	0	95.486	1815500000	480180000	1335300000	5	7	7	5	Q9H0U3	Magnesium transporter protein 1
Q8NBJ5	COLGALT1	0.736489	0.868418	0.802454	0.0932879	34	34	34	53.9	53.9	53.9	71.635	0	301.86	17788000000	3724900000	14063000000	19	31	14	11	Q8NBJ5	Procollagen galactosyltransferase 1
Q2PZI1	DPY19L1	1.34807		1.34807	#DIV/0!	6	6	6	12.3	12.3	12.3	77.318	0	9.631	186920000	24090000	162830000	2	5	2	1	Q2PZI1	Probable C-mannosyltransferase DPY19L1
P46531	NOTCH1				#DIV/0!	8	8	7	3.4	3.4	3	272.5	0	9.8365	82092000	9253700	72839000	5	7	0	0	P46531;Q9UM47	Neurogenic locus notch homolog protein 1;Notch 1 extracellular truncation;Notch 1 intracellular domain
P56937	HSD17B7	-0.0506891		-0.0506891	#DIV/0!	5	5	5	20.5	20.5	20.5	38.206	0	38.162	531720000	141640000	390080000	2	5	2	2	P56937	3-keto-steroid reductase
O43809	NUDT21	-0.0236538	-0.0083125	-0.0159831	0.0108479	19	19	19	85	85	85	26.227	0	323.31	27478000000	10913000000	16565000000	7	13	13	18	O43809	Cleavage and polyadenylation specificity factor subunit 5
O75347	TBCA	0.792068	1.0907	0.941383	0.211165	15	15	15	63.9	63.9	63.9	12.855	0	223.35	15668000000	5839500000	9828300000	5	14	13	14	O75347	Tubulin-specific chaperone A
P12956	XRCC6	0.587746	0.459849	0.523798	0.0904368	47	47	47	65.4	65.4	65.4	69.842	0	323.31	114800000000	44222000000	70581000000	36	39	31	34	P12956	X-ray repair cross-complementing protein 6
Q9P016	THYN1	-0.902904	-1.25105	-1.07698	0.246176	8	8	8	32.9	32.9	32.9	25.697	0	85.034	1418300000	633940000	784400000	1	6	4	2	Q9P016	Thymocyte nuclear protein 1
P08236	GUSB	1.81834	1.81421	1.81628	0.00292035	17	17	17	35.6	35.6	35.6	74.731	0	128.48	4215800000	791520000	3424300000	10	13	5	5	P08236	Beta-glucuronidase
P14317	HCLS1	1.04212	1.90404	1.47308	0.609469	18	18	18	42.8	42.8	42.8	54.013	0	239.15	8926500000	1838300000	7088200000	9	17	8	4	P14317	Hematopoietic lineage cell-specific protein
P21964	COMT	2.16941	2.01752	2.09346	0.107402	24	24	24	76.8	76.8	76.8	30.037	0	323.31	40165000000	7956900000	32208000000	12	18	14	21	P21964	Catechol O-methyltransferase
Q92688	ANP32B	-0.274391	-0.477806	-0.376099	0.143836	12	10	10	34.3	29.1	29.1	28.787	0	130.18	18017000000	8223200000	9793600000	7	10	9	8	Q92688	Acidic leucine-rich nuclear phosphoprotein 32 family member B
P16591	FER				#DIV/0!	5	4	4	9.2	7.9	7.9	94.637	0	5.5734	1264700000	90420000	1174300000	2	4	0	1	P16591	Tyrosine-protein kinase Fer
Q13232	NME3	2.09141	1.70523	1.89832	0.27307	5	5	5	34.3	34.3	34.3	19.015	0	12.281	488040000	85310000	402730000	1	4	1	2	Q13232	Nucleoside diphosphate kinase 3
Q92611	EDEM1	3.35489	3.30667	3.33078	0.0340967	12	12	12	24.5	24.5	24.5	73.767	0	168.8	2292900000	346540000	1946400000	8	9	6	5	Q92611	ER degradation-enhancing alpha-mannosidase-like protein 1
Q9ULQ1	TPCN1	2.25763		2.25763	#DIV/0!	3	3	3	5.1	5.1	5.1	94.146	0	11.771	131620000	34931000	96692000	3	2	2	0	Q9ULQ1	Two pore calcium channel protein 1
P60983	GMFB	0.499979	0.417063	0.458521	0.0586305	9	6	6	76.1	47.2	47.2	16.713	0	154.58	3426300000	1387100000	2039200000	4	6	7	6	P60983	Glia maturation factor beta
Q96I15	SCLY	1.50448	0.211537	0.858006	0.914249	7	7	7	26.3	26.3	26.3	48.148	0	54.881	1592500000	572610000	1019900000	5	6	5	4	Q96I15	Selenocysteine lyase
Q8N4V1	MMGT1	0.369193	0.45017	0.409681	0.0572594	4	4	4	32.1	32.1	32.1	14.686	0	72.342	1376900000	540460000	836440000	0	4	2	2	Q8N4V1	Membrane magnesium transporter 1
Q9BSJ8	ESYT1	0.784761	0.920626	0.852693	0.0960711	56	56	56	62	62	62	122.85	0	323.31	64545000000	19957000000	44588000000	41	46	39	39	Q9BSJ8	Extended synaptotagmin-1
O75369	FLNB	0.598663	0.83573	0.717197	0.167632	175	163	159	80.4	78.1	77	278.16	0	323.31	126270000000	40195000000	86072000000	144	162	145	138	O75369	Filamin-B
P08575	PTPRC	-0.239392	-0.428065	-0.333728	0.133412	64	64	64	49.1	49.1	49.1	147.48	0	323.31	42138000000	20260000000	21878000000	49	49	53	53	P08575	Receptor-type tyrosine-protein phosphatase C
Q3MHD2	LSM12	0.0310399	0.320295	0.175667	0.204534	7	7	7	50.8	50.8	50.8	21.701	0	79.907	2771200000	1332700000	1438500000	3	6	7	5	Q3MHD2	Protein LSM12 homolog
Q3YEC7	RABL6	-0.0242438	0.702731	0.339243	0.514049	15	15	15	21	21	21	79.548	0	73.599	819750000	314550000	505200000	5	8	7	7	Q3YEC7	Rab-like protein 6
Q9H3K2	GHITM	1.42339	1.08504	1.25422	0.23925	7	7	7	18.3	18.3	18.3	37.205	0	18.58	3248200000	852650000	2395500000	6	7	6	5	Q9H3K2	Growth hormone-inducible transmembrane protein
P61160	ACTR2	1.13416	1.1101	1.12213	0.017013	14	14	14	41.1	41.1	41.1	44.76	0	323.31	16928000000	4424500000	12503000000	10	7	12	7	P61160	Actin-related protein 2
Q15843	NEDD8	0.173369	0.39743	0.285399	0.158435	6	6	6	51.9	51.9	51.9	9.0714	0	90.217	10785000000	3885600000	6899500000	3	5	4	5	Q15843	NEDD8
P61803	DAD1	1.13346	1.1083	1.12088	0.0177908	4	4	4	35.4	35.4	35.4	12.497	0	22.237	22378000000	7093300000	15285000000	3	4	4	4	P61803	Dolichyl-diphosphooligosaccharide--protein glycosyltransferase subunit DAD1
Q92520	FAM3C	1.29975	1.71878	1.50927	0.296299	12	12	12	51.5	51.5	51.5	24.68	0	100.86	3010800000	647870000	2362900000	3	10	5	7	Q92520	Protein FAM3C
P03886	MT-ND1	-0.337523	0.0590289	-0.139247	0.280405	4	4	4	9.1	9.1	9.1	35.66	0	29.434	1989200000	972870000	1016400000	4	4	3	3	P03886	NADH-ubiquinone oxidoreductase chain 1
Q70UQ0	IKBIP				#DIV/0!	5	5	5	14.9	14.9	14.9	39.309	0	9.679	329850000	72036000	257820000	3	3	0	0	Q70UQ0	Inhibitor of nuclear factor kappa-B kinase-interacting protein
Q66K14	TBC1D9B	-0.78064	-0.374531	-0.577586	0.287162	29	29	29	30.7	30.7	30.7	140.52	0	174.55	2450000000	1343400000	1106600000	15	18	15	16	Q66K14;Q6ZT07	TBC1 domain family member 9B
Q16850	CYP51A1	-0.977823		-0.977823	#DIV/0!	13	13	13	33.2	33.2	33.2	56.805	0	106.94	3493900000	698310000	2795600000	8	12	3	0	Q16850	Lanosterol 14-alpha demethylase
Q9UGP8	SEC63	0.494495	0.434764	0.46463	0.0422362	26	26	26	43.3	43.3	43.3	87.996	0	323.31	10987000000	3803100000	7184400000	15	21	15	14	Q9UGP8	Translocation protein SEC63 homolog
P38159;Q96E39	RBMX;RBMXL1	0.788662	-0.683252	0.0527049	1.0408	18	18	17	43.2	43.2	41.4	42.331	0	122.35	14840000000	8064900000	6775400000	4	11	14	13	P38159;Q96E39;O75526;Q8N7X1	RNA-binding motif protein, X chromosome;RNA-binding motif protein, X chromosome, N-terminally processed;RNA binding motif protein, X-linked-like-1
Q9NRX4	PHPT1	0.633005	0.616301	0.624653	0.0118115	4	4	4	45.6	45.6	45.6	13.832	0	51.568	2742900000	1097900000	1645000000	1	4	4	2	Q9NRX4	14 kDa phosphohistidine phosphatase
P15848	ARSB	2.25633	2.19779	2.22706	0.041394	11	11	11	22	22	22	59.687	0	39.427	1928300000	389110000	1539100000	4	10	7	8	P15848	Arylsulfatase B
Q96C19	EFHD2	1.66697	1.54326	1.60512	0.0874762	13	13	13	47.1	47.1	47.1	26.697	0	88.886	5980000000	1090800000	4889200000	4	12	7	5	Q96C19;Q9BUP0	EF-hand domain-containing protein D2
Q9UDX5	MTFP1	0.502139	0.836064	0.669102	0.236121	6	6	6	36.7	36.7	36.7	18.01	0	34.151	2949000000	1082600000	1866400000	4	6	3	2	Q9UDX5	Mitochondrial fission process protein 1
P62993	GRB2	0.527564	0.601983	0.564773	0.0526222	19	19	19	67.7	67.7	67.7	25.206	0	66.802	17671000000	6404400000	11267000000	5	12	13	14	P62993	Growth factor receptor-bound protein 2
P49366	DHPS	1.89634	1.83028	1.86331	0.0467115	13	13	13	46.6	46.6	46.6	40.97	0	167.34	1995600000	326350000	1669300000	4	12	7	2	P49366	Deoxyhypusine synthase
P08648	ITGA5	0.501275	0.852265	0.67677	0.248187	30	30	30	42.8	42.8	42.8	114.54	0	323.31	20774000000	4905800000	15868000000	22	27	19	21	P08648	Integrin alpha-5;Integrin alpha-5 heavy chain;Integrin alpha-5 light chain
P62826	RAN	-0.278798	-0.164375	-0.221586	0.0809093	25	25	25	66.2	66.2	66.2	24.423	0	323.31	135950000000	64117000000	71837000000	15	19	18	23	P62826	GTP-binding nuclear protein Ran
P12814	ACTN1	1.03834	0.977602	1.00797	0.0429483	76	76	46	84.6	84.6	60.1	103.06	0	323.31	293020000000	87670000000	205350000000	65	70	51	45	P12814	Alpha-actinin-1
A0AV96	RBM47		0.6589	0.6589	#DIV/0!	6	6	6	16.2	16.2	16.2	64.098	0	21.224	210680000	72410000	138270000	3	2	1	3	A0AV96	RNA-binding protein 47
P13473	LAMP2	1.82121	2.1378	1.9795	0.223863	8	8	8	18.5	18.5	18.5	44.96	0	134.03	61010000000	10267000000	50743000000	7	8	6	7	P13473	Lysosome-associated membrane glycoprotein 2
Q9Y241	HIGD1A	1.00925	1.11312	1.06118	0.0734472	3	3	3	51.6	51.6	51.6	10.143	0	86.08	696000000	141960000	554040000	2	3	3	2	Q9Y241;A8MV81	HIG1 domain family member 1A, mitochondrial
P36543	ATP6V1E1	0.947095	0.841186	0.89414	0.074889	11	11	11	54	54	54	26.145	0	103.7	5080300000	1745800000	3334500000	3	7	8	6	P36543;Q96A05	V-type proton ATPase subunit E 1
Q9P0S3	ORMDL1	0.789758	0.367832	0.578795	0.298347	5	5	3	38.6	38.6	26.8	17.371	0	26.223	786480000	265590000	520890000	1	4	4	3	Q9P0S3;Q53FV1	ORM1-like protein 1
P62314	SNRPD1	-0.247997	-0.175225	-0.211611	0.0514576	5	5	5	54.6	54.6	54.6	13.281	0	119	5588400000	2225900000	3362400000	2	4	5	4	P62314	Small nuclear ribonucleoprotein Sm D1
P62841	RPS15	0.0857531	-0.00848771	0.0386327	0.0666383	8	8	8	72.4	72.4	72.4	17.04	0	90.354	13764000000	7896800000	5867000000	3	6	7	7	P62841	40S ribosomal protein S15
O15228	GNPAT	1.41546	1.17608	1.29577	0.169267	25	25	25	44.3	44.3	44.3	77.187	0	319.1	4546600000	849210000	3697400000	11	23	6	10	O15228	Dihydroxyacetone phosphate acyltransferase
Q9H6E4	CCDC134	-0.167389	-0.310234	-0.238811	0.101007	13	13	13	52.8	52.8	52.8	26.56	0	152.94	3358400000	1126500000	2231900000	5	8	9	10	Q9H6E4	Coiled-coil domain-containing protein 134
Q13423	NNT	1.25867	1.16395	1.21131	0.0669772	52	52	52	47.3	47.3	47.3	113.89	0	323.31	101010000000	24171000000	76843000000	43	51	41	44	Q13423	NAD(P) transhydrogenase, mitochondrial
O94826	TOMM70A	-0.204749	-0.132414	-0.168581	0.0511486	29	29	29	63.2	63.2	63.2	67.454	0	323.31	20082000000	8306700000	11776000000	17	23	14	16	O94826	Mitochondrial import receptor subunit TOM70
Q9BZQ8	FAM129A	2.9331	3.0927	3.0129	0.112854	21	21	21	28.8	28.8	28.8	103.13	0	185.8	2506000000	345610000	2160400000	7	10	10	13	Q9BZQ8;REV__Q9UHV5	Protein Niban
Q96PU4	UHRF2	1.18672		1.18672	#DIV/0!	7	7	7	12.7	12.7	12.7	89.984	0	13.352	318760000	99008000	219750000	4	3	3	1	Q96PU4	E3 ubiquitin-protein ligase UHRF2
O75915	ARL6IP5	1.38975	1.40132	1.39553	0.00818123	6	6	6	28.7	28.7	28.7	21.614	0	245.64	7808900000	2066300000	5742600000	5	6	4	5	O75915	PRA1 family protein 3
Q9H3S4	TPK1		1.32086	1.32086	#DIV/0!	2	2	2	13.6	13.6	13.6	27.265	0	36.192	312460000	63295000	249170000	2	2	1	2	Q9H3S4	Thiamin pyrophosphokinase 1
Q9H173	SIL1	1.91564	2.12978	2.02271	0.15142	8	8	8	26.2	26.2	26.2	52.084	0	53.461	1217300000	160720000	1056500000	4	6	4	2	Q9H173	Nucleotide exchange factor SIL1
Q96AQ8	MCUR1	-2.06034	-1.63519	-1.84776	0.300626	6	6	6	15.9	15.9	15.9	39.694	0	10.223	1358700000	593670000	765030000	0	3	4	5	Q96AQ8	Mitochondrial calcium uniporter regulator 1
Q9NXC5	MIOS	0.643241		0.643241	#DIV/0!	6	6	6	9	9	9	98.583	0	19.872	297130000	132360000	164760000	2	1	5	2	Q9NXC5	WD repeat-containing protein mio
Q6ZNA5	FRRS1				#DIV/0!	3	3	3	5.4	5.4	5.4	66.114	0	3.4147	369560000	119880000	249680000	3	2	1	0	Q6ZNA5	Ferric-chelate reductase 1
Q9NVJ2	ARL8B	1.82388	1.83597	1.82992	0.00854892	14	14	7	74.2	74.2	41.9	21.539	0	323.31	22459000000	6231700000	16227000000	12	12	12	11	Q9NVJ2	ADP-ribosylation factor-like protein 8B
P09622	DLD	0.611403	0.647821	0.629612	0.0257514	23	23	23	63.9	63.9	63.9	54.177	0	323.31	33898000000	11635000000	22262000000	11	15	14	16	P09622	Dihydrolipoyl dehydrogenase, mitochondrial
P0DPI2;A0A0B4J2D5		-0.941279	-0.893261	-0.91727	0.0339539	17	17	17	70.9	70.9	70.9	28.17	0	323.31	29208000000	14413000000	14795000000	6	9	13	15	P0DPI2;A0A0B4J2D5
P98155	VLDLR				#DIV/0!	10	10	10	15.6	15.6	15.6	96.098	0	23.782	408410000	40335000	368080000	4	8	2	7	P98155	Very low-density lipoprotein receptor
Q96AT9	RPE	2.07215	1.97988	2.02601	0.0652447	7	7	7	46.5	46.5	46.5	24.927	0	257.18	8368600000	1450200000	6918400000	2	7	4	6	Q96AT9;Q2QD12	Ribulose-phosphate 3-epimerase
P18669	PGAM1	2.01781	2.07402	2.04591	0.0397465	25	25	18	87.4	87.4	74.8	28.804	0	323.31	88731000000	15339000000	73392000000	13	23	19	20	P18669;Q8N0Y7	Phosphoglycerate mutase 1
P11234	RALB	-0.078119	-0.495119	-0.286619	0.294864	12	12	6	57.8	57.8	24.3	23.408	0	323.31	5206500000	2052400000	3154100000	4	10	10	11	P11234	Ras-related protein Ral-B
Q13724	MOGS	0.753725	0.695829	0.724777	0.0409387	27	27	27	46.5	46.5	46.5	91.916	0	323.31	14420000000	5027300000	9393100000	13	21	14	19	Q13724	Mannosyl-oligosaccharide glucosidase
P14625	HSP90B1	1.06519	0.923379	0.994282	0.100276	62	60	60	63.3	61.5	61.5	92.468	0	323.31	187570000000	39740000000	147830000000	48	60	35	37	P14625;Q58FF3	Endoplasmin
P21266	GSTM3	1.25069	1.14749	1.19909	0.0729734	21	21	19	78.2	78.2	71.1	26.559	0	137.86	17683000000	5271100000	12412000000	10	18	16	17	P21266	Glutathione S-transferase Mu 3
P06493	CDK1	0.959045	1.29831	1.12868	0.239897	13	11	11	53.2	46.8	46.8	34.095	0	167.86	8155100000	4885400000	3269700000	2	8	11	6	P06493	Cyclin-dependent kinase 1
P14859;Q9UKI9	POU2F1;POU2F3	1.88705		1.88705	#DIV/0!	6	6	6	15.2	15.2	15.2	76.471	0	79.034	509260000	65816000	443450000	2	6	2	0	P14859;Q9UKI9;P09086	POU domain, class 2, transcription factor 1;POU domain, class 2, transcription factor 3
P52565	ARHGDIA	-0.0960348	-0.0616251	-0.07883	0.0243313	11	11	11	71.6	71.6	71.6	23.207	0	323.31	52124000000	22747000000	29377000000	6	9	9	8	P52565	Rho GDP-dissociation inhibitor 1
Q8TD55	PLEKHO2	1.74474		1.74474	#DIV/0!	7	7	7	16.5	16.5	16.5	53.349	0	13.839	318660000	79615000	239050000	3	3	3	0	Q8TD55	Pleckstrin homology domain-containing family O member 2
Q99417	MYCBP	0.0956654	0.385478	0.240572	0.204928	8	8	8	73.8	73.8	73.8	11.967	0	106.81	6088400000	2192800000	3895600000	1	5	6	8	Q99417	C-Myc-binding protein
Q9Y6K0	CEPT1	0.478084	0.594004	0.536044	0.0819678	2	2	2	4.8	4.8	4.8	46.553	0	3.913	1741900000	499530000	1242300000	2	2	1	2	Q9Y6K0	Choline/ethanolaminephosphotransferase 1
Q99805	TM9SF2	0.855535	0.576366	0.71595	0.197402	15	15	15	26.8	26.8	26.8	75.775	0	149.43	4807500000	1174800000	3632700000	12	15	10	7	Q99805	Transmembrane 9 superfamily member 2
P60059	SEC61G	1.25765	1.06515	1.1614	0.136118	3	3	3	48.5	48.5	48.5	7.7412	0	14.861	1317900000	445630000	872290000	2	2	2	3	P60059	Protein transport protein Sec61 subunit gamma
P04233	CD74	4.64703		4.64703	#DIV/0!	5	5	5	18.9	18.9	18.9	33.515	0	133.59	1499900000	83579000	1416300000	1	5	2	3	P04233	HLA class II histocompatibility antigen gamma chain
Q9C0D9	EPT1	0.322539		0.322539	#DIV/0!	3	3	3	13.4	13.4	13.4	45.228	0	6.0561	124620000	35054000	89564000	3	1	2	0	Q9C0D9	Ethanolaminephosphotransferase 1
Q01082	SPTBN1	1.00184	1.20963	1.10574	0.14693	160	160	146	71.8	71.8	67	274.61	0	323.31	93262000000	27952000000	65309000000	131	140	125	113	Q01082	Spectrin beta chain, non-erythrocytic 1
Q9UJS0	SLC25A13	1.00388	0.952324	0.978103	0.0364556	25	19	19	50.1	41.8	41.8	74.175	0	259.66	13824000000	3665000000	10159000000	17	22	16	15	Q9UJS0	Calcium-binding mitochondrial carrier protein Aralar2
Q16658	FSCN1	-1.09847	-1.07404	-1.08625	0.0172746	34	34	34	78.1	78.1	78.1	54.529	0	323.31	26241000000	11555000000	14686000000	7	23	26	21	Q16658	Fascin
Q96E52	OMA1	0.491312		0.491312	#DIV/0!	4	4	4	8.2	8.2	8.2	60.12	0.0043506	1.615	98084000	35537000	62547000	1	1	2	0	Q96E52	Metalloendopeptidase OMA1, mitochondrial
P23921	RRM1	0.583772	0.519736	0.551754	0.0452803	29	29	29	48	48	48	90.069	0	323.31	8489500000	2492800000	5996800000	17	23	13	9	P23921	Ribonucleoside-diphosphate reductase large subunit
P19105;O14950	MYL12A;MYL12B	0.748996	0.795086	0.772041	0.0325906	8	8	3	62.6	62.6	24	19.794	0	323.31	14314000000	4440900000	9872900000	5	7	6	7	P19105;O14950	Myosin regulatory light chain 12A;Myosin regulatory light chain 12B
Q9H4E7	DEF6	0.206544	0.182205	0.194374	0.0172103	15	15	15	29.2	29.2	29.2	73.91	0	78.962	1215500000	353850000	861650000	6	14	6	5	Q9H4E7;Q6TDU7	Differentially expressed in FDCP 6 homolog
P51659	HSD17B4	1.24575	0.976168	1.11096	0.190623	42	42	42	64	64	64	79.685	0	323.31	36079000000	13395000000	22683000000	25	36	28	21	P51659	Peroxisomal multifunctional enzyme type 2;(3R)-hydroxyacyl-CoA dehydrogenase;Enoyl-CoA hydratase 2
Q9NPE3	NOP10	-0.045204	-0.147699	-0.0964515	0.0724749	8	8	8	87.5	87.5	87.5	7.7059	0	42.454	2334500000	1409100000	925420000	1	5	5	8	Q9NPE3	H/ACA ribonucleoprotein complex subunit 3
Q8IWB7	WDFY1	2.92246	2.58667	2.75456	0.237439	16	16	16	46.1	46.1	46.1	46.323	0	174	2550300000	519170000	2031100000	2	13	12	5	Q8IWB7	WD repeat and FYVE domain-containing protein 1
P28290	SSFA2				#DIV/0!	11	11	11	11.4	11.4	11.4	138.38	0	19.648	101380000	42667000	58712000	5	5	2	0	P28290	Sperm-specific antigen 2
Q8WUD4	CCDC12	0.824453	0.187981	0.506217	0.450054	10	10	10	64.5	64.5	64.5	19.181	0	172.69	1176900000	358400000	818450000	2	7	3	4	Q8WUD4	Coiled-coil domain-containing protein 12
Q7Z7M0	MEGF8	1.80486	2.60395	2.2044	0.565042	10	10	10	5.3	5.3	5.3	303.1	0	25.899	204200000	38633000	165570000	6	7	5	6	Q7Z7M0	Multiple epidermal growth factor-like domains protein 8
Q13445	TMED1	-1.00728	-1.46402	-1.23565	0.322964	5	5	5	22	22	22	25.206	0	103.65	1888700000	868930000	1019700000	1	4	3	3	Q13445	Transmembrane emp24 domain-containing protein 1
Q8NCW5	APOA1BP	1.31756	1.43648	1.37702	0.0840891	14	14	14	53.1	53.1	53.1	31.674	0	317.1	23889000000	5462500000	18427000000	8	13	10	10	Q8NCW5	NAD(P)H-hydrate epimerase
Q96ME7	ZNF512	-1.22841		-1.22841	#DIV/0!	4	4	4	10.9	10.9	10.9	64.681	0	8.9818	203050000	150960000	52082000	2	0	3	1	Q96ME7	Zinc finger protein 512
P41240	CSK	0.257907	-0.200712	0.0285975	0.324293	17	17	17	50	50	50	50.704	0	123.19	3396100000	1366900000	2029200000	9	10	11	6	P41240;P42679	Tyrosine-protein kinase CSK
O00151	PDLIM1	1.16025	0.555768	0.858007	0.427433	19	19	19	79.6	79.6	79.6	36.071	0	323.31	6579300000	2084600000	4494700000	6	15	16	9	O00151	PDZ and LIM domain protein 1
Q969N2	PIGT	2.04496	1.41112	1.72804	0.448193	17	17	17	38.6	38.6	38.6	65.699	0	168.73	3926400000	850220000	3076200000	5	15	8	8	Q969N2	GPI transamidase component PIG-T
P08133	ANXA6	1.8794	1.77958	1.82949	0.0705834	38	38	38	59.4	59.4	59.4	75.872	0	323.31	29720000000	5326000000	24394000000	26	36	22	17	P08133	Annexin A6
Q9NQP4	PFDN4	0.833137	1.2194	1.02627	0.273129	6	6	6	38.8	38.8	38.8	15.314	0	176.35	1751500000	697650000	1053900000	1	5	4	2	Q9NQP4	Prefoldin subunit 4
Q9P0I2	EMC3	0.275239	0.433486	0.354362	0.111898	10	10	10	45.2	45.2	45.2	29.952	0	218.23	1581100000	424260000	1156800000	3	7	2	6	Q9P0I2	ER membrane protein complex subunit 3
Q12913	PTPRJ	3.70464	3.38828	3.54646	0.2237	30	30	30	32	32	32	145.94	0	323.31	4094400000	675060000	3419300000	18	26	12	13	Q12913	Receptor-type tyrosine-protein phosphatase eta
O60884	DNAJA2	0.91719	0.656789	0.78699	0.184131	11	11	11	29.9	29.9	29.9	45.745	0	71.868	2094500000	875720000	1218800000	4	7	9	4	O60884	DnaJ homolog subfamily A member 2
Q8IXB1	DNAJC10	0.795953	1.09795	0.946952	0.213544	14	14	14	22.1	22.1	22.1	91.079	0	179.69	2652300000	714260000	1938100000	8	13	7	8	Q8IXB1	DnaJ homolog subfamily C member 10
Q9Y3B3	TMED7	0.907332	0.729221	0.818277	0.125943	8	8	8	46.4	46.4	46.4	25.171	0	151.69	5958600000	1580600000	4378100000	2	6	7	4	Q9Y3B3	Transmembrane emp24 domain-containing protein 7
P24539	ATP5F1	0.820632	0.693522	0.757077	0.0898803	18	18	18	57.8	57.8	57.8	28.908	0	323.31	33993000000	11249000000	22744000000	6	14	12	17	P24539	ATP synthase F(0) complex subunit B1, mitochondrial
P20618	PSMB1	0.657496	0.563013	0.610255	0.0668096	12	12	12	58.1	58.1	58.1	26.489	0	292.26	22585000000	8197100000	14388000000	4	10	6	11	P20618	Proteasome subunit beta type-1
Q13951	CBFB	0.182061	0.362947	0.272504	0.127906	8	8	8	40.1	40.1	40.1	21.508	0	172.16	1684700000	402900000	1281800000	1	6	3	3	Q13951	Core-binding factor subunit beta
Q86SF2	GALNT7	1.35447		1.35447	#DIV/0!	15	15	15	27.7	27.7	27.7	75.388	0	123.06	2070000000	818240000	1251800000	5	14	5	1	Q86SF2	N-acetylgalactosaminyltransferase 7
O43491	EPB41L2	0.261718	0.328641	0.295179	0.0473217	51	51	47	59	59	56.4	112.59	0	323.31	26713000000	11662000000	15051000000	35	40	35	37	O43491	Band 4.1-like protein 2
P80217	IFI35	0.836811	0.818578	0.827694	0.0128927	11	11	11	51	51	51	31.546	0	146.09	2264800000	582450000	1682400000	6	9	5	4	P80217	Interferon-induced 35 kDa protein
Q8N5M4	TTC9C	-1.62861	-1.0372	-1.3329	0.41819	6	6	6	35.7	35.7	35.7	20.012	0	70.35	1610700000	972900000	637820000	2	3	4	3	Q8N5M4	Tetratricopeptide repeat protein 9C
P28065	PSMB9	2.7871	2.85658	2.82184	0.0491298	8	8	8	57.5	57.5	57.5	23.264	0	49.98	5860600000	1049700000	4810800000	3	7	5	5	P28065	Proteasome subunit beta type-9
P11182	DBT	0.34429	0.131051	0.237671	0.150783	10	10	10	33.6	33.6	33.6	53.486	0	80.486	1175100000	377230000	797830000	4	5	4	3	P11182	Lipoamide acyltransferase component of branched-chain alpha-keto acid dehydrogenase complex, mitochondrial
Q9NYV4	CDK12	-0.324452	0.42308	0.0493139	0.528585	27	27	23	26.2	26.2	22.4	164.15	0	262.04	4467900000	1889900000	2578000000	23	20	13	10	Q9NYV4	Cyclin-dependent kinase 12
Q9H553	ALG2	0.83764		0.83764	#DIV/0!	7	7	7	24.5	24.5	24.5	47.091	0	17.198	561250000	197490000	363760000	5	3	6	3	Q9H553	Alpha-1,3/1,6-mannosyltransferase ALG2
Q9H5X1	FAM96A	1.63231	1.36068	1.4965	0.192071	7	7	7	52.5	52.5	52.5	18.355	0	24.27	2007700000	623760000	1384000000	3	5	5	4	Q9H5X1	MIP18 family protein FAM96A
P35637	FUS	0.421865	0.340856	0.381361	0.057282	14	14	12	23.4	23.4	23.4	53.425	0	294.38	30997000000	13145000000	17851000000	9	13	12	10	P35637	RNA-binding protein FUS
P28062	PSMB8	1.52529	1.59065	1.55797	0.0462165	15	15	15	54.3	54.3	54.3	30.354	0	126.18	15739000000	4272600000	11467000000	2	10	8	14	P28062	Proteasome subunit beta type-8
P55160	NCKAP1L	1.80566	1.78179	1.79373	0.0168786	42	42	39	42.6	42.6	41	128.15	0	323.31	8085200000	1839200000	6246000000	22	30	24	26	P55160	Nck-associated protein 1-like
P67812	SEC11A	0.743629	0.940325	0.841977	0.139085	9	9	9	42.5	42.5	42.5	20.625	0	34.224	16583000000	4928500000	11654000000	5	9	7	6	P67812	Signal peptidase complex catalytic subunit SEC11A
Q9BWJ5	SF3B5	0.366392	0.347455	0.356923	0.0133905	7	7	7	87.2	87.2	87.2	10.135	0	81.126	3658600000	1717800000	1940800000	1	7	7	5	Q9BWJ5	Splicing factor 3B subunit 5
P04350	TUBB4A	3.50561	3.16066	3.33314	0.243916	27	3	1	69.8	9.5	3.6	49.585	0	190.43	4789000000	794620000	3994300000	19	22	24	23	P04350	Tubulin beta-4A chain
P34059	GALNS	2.09095	2.3468	2.21888	0.180913	4	4	4	11.5	11.5	11.5	58.025	0	35.933	774570000	176570000	598000000	3	3	2	2	P34059	N-acetylgalactosamine-6-sulfatase
Q12824	SMARCB1	-0.0418716	0.198819	0.0784735	0.170194	12	12	12	45.2	45.2	45.2	44.141	0	205.25	1887400000	990960000	896430000	1	3	11	3	Q12824	SWI/SNF-related matrix-associated actin-dependent regulator of chromatin subfamily B member 1
Q96S52	PIGS	1.69484	1.80329	1.74907	0.0766857	16	16	16	36	36	36	61.655	0	220.35	6153600000	1371500000	4782000000	8	13	8	8	Q96S52	GPI transamidase component PIG-S
P62937	PPIA	1.10453	1.20285	1.15369	0.0695227	21	21	21	89.7	89.7	89.7	18.012	0	323.31	312640000000	82748000000	229900000000	12	18	15	15	P62937;P0DN26;A0A0B4J2A2;A0A075B767;A0A075B759;Q9Y536;F5H284;P0DN37	Peptidyl-prolyl cis-trans isomerase A;Peptidyl-prolyl cis-trans isomerase A, N-terminally processed
Q13867	BLMH	1.63127	1.54428	1.58778	0.0615112	19	19	19	51.9	51.9	51.9	52.562	0	133.06	10049000000	3139200000	6909500000	6	12	9	10	Q13867	Bleomycin hydrolase
Q9NR77	PXMP2				#DIV/0!	4	4	4	11.8	11.8	11.8	22.252	0	4.3985	336160000	23557000	312610000	1	3	1	0	Q9NR77	Peroxisomal membrane protein 2
P43487	RANBP1	0.443145	0.326217	0.384681	0.0826806	8	8	8	59.7	59.7	59.7	23.31	0	216.63	20919000000	8207200000	12712000000	2	6	6	4	P43487;Q9C010	Ran-specific GTPase-activating protein
O15145	ARPC3	1.54774	2.0089	1.77832	0.326089	12	12	12	72.5	72.5	72.5	20.546	0	64.528	16911000000	3460100000	13450000000	4	10	4	9	O15145	Actin-related protein 2/3 complex subunit 3
P61457	PCBD1	2.04677	1.92153	1.98415	0.0885581	7	7	7	73.1	73.1	73.1	11.999	0	22.398	1741000000	502840000	1238100000	3	3	5	6	P61457	Pterin-4-alpha-carbinolamine dehydratase
Q9UBW5	BIN2	1.79371	1.50875	1.65123	0.201497	18	18	18	48.1	48.1	48.1	61.874	0	323.31	6243500000	1026200000	5217300000	9	18	8	7	Q9UBW5;O00499;P49418	Bridging integrator 2
P52630	STAT2	1.76209	0.69255	1.22732	0.756279	11	11	11	17.2	17.2	17.2	97.915	0	28.912	493770000	157980000	335790000	4	7	4	2	P52630	Signal transducer and activator of transcription 2
P30085	CMPK1	-0.197246	-0.304595	-0.25092	0.0759072	10	10	10	47.4	47.4	47.4	22.222	0	111.31	13318000000	6487200000	6830900000	6	8	8	8	P30085	UMP-CMP kinase
O43808	SLC25A17	1.93798	2.01828	1.97813	0.0567807	7	7	7	30.9	30.9	30.9	34.566	0	29.674	747020000	132450000	614570000	4	6	4	2	O43808	Peroxisomal membrane protein PMP34
P26583	HMGB2	-0.382235	-0.765466	-0.573851	0.270985	20	20	15	66	66	49.3	24.033	0	260.75	50317000000	23199000000	27118000000	5	15	12	8	P26583	High mobility group protein B2
Q13636	RAB31	2.95478	2.64507	2.79992	0.218998	9	9	7	58.8	58.8	47.4	21.569	0	81.833	2439200000	295340000	2143800000	2	7	5	6	Q13636	Ras-related protein Rab-31
Q86Y39	NDUFA11	0.0623557	0.259563	0.160959	0.139447	8	8	8	73.8	73.8	73.8	14.852	0	109.45	7495700000	4868400000	2627300000	4	6	7	8	Q86Y39	NADH dehydrogenase [ubiquinone] 1 alpha subcomplex subunit 11
Q8N584	TTC39C				#DIV/0!	4	4	4	8.9	8.9	8.9	65.869	0	3.8647	102920000	19226000	83696000	2	2	1	0	Q8N584	Tetratricopeptide repeat protein 39C
O15260	SURF4	0.879493	0.805568	0.842531	0.0522729	6	6	6	24.5	24.5	24.5	30.394	0	128.09	11870000000	3602500000	8267500000	6	6	5	6	O15260	Surfeit locus protein 4
Q9Y2Z9	COQ6	0.257741		0.257741	#DIV/0!	7	7	7	24.1	24.1	24.1	50.869	0	28.505	684470000	252030000	432440000	3	2	4	1	Q9Y2Z9	Ubiquinone biosynthesis monooxygenase COQ6, mitochondrial
O75964	ATP5L	0.656576	0.724697	0.690636	0.0481688	11	11	10	66	66	60.2	11.428	0	78.013	34422000000	12661000000	21762000000	6	9	8	10	O75964	ATP synthase subunit g, mitochondrial
P35579	MYH9	0.755464	0.739535	0.7475	0.0112635	186	186	158	69.4	69.4	60.8	226.53	0	323.31	486380000000	152000000000	334380000000	152	175	138	148	P35579;REV__Q9UKV3;P13535;Q9UKX3;P12882;Q9UKX2;A7E2Y1	Myosin-9
Q8N0U8	VKORC1L1	1.007	1.11491	1.06095	0.0763039	6	6	6	32.4	32.4	32.4	19.835	0	19.589	2761200000	679320000	2081800000	5	5	6	4	Q8N0U8	Vitamin K epoxide reductase complex subunit 1-like protein 1
Q13177	PAK2	0.895473	0.68646	0.790966	0.147795	29	29	23	63.4	63.4	53.6	58.042	0	323.31	16524000000	5314700000	11210000000	10	24	19	9	Q13177;O75914	Serine/threonine-protein kinase PAK 2;PAK-2p27;PAK-2p34
O95571	ETHE1	1.9276	1.91921	1.9234	0.00593263	13	13	13	78	78	78	27.873	0	323.31	15622000000	3343600000	12279000000	7	11	10	12	O95571	Persulfide dioxygenase ETHE1, mitochondrial
Q02978	SLC25A11	0.220165	0.0521597	0.136163	0.118798	17	17	17	58	58	58	34.061	0	323.31	26135000000	8355700000	17779000000	11	17	12	10	Q02978	Mitochondrial 2-oxoglutarate/malate carrier protein
O15143	ARPC1B	1.48243	1.16871	1.32557	0.221834	21	21	20	56.5	56.5	50.3	40.949	0	323.31	27101000000	6024700000	21076000000	11	19	17	16	O15143	Actin-related protein 2/3 complex subunit 1B
O00244	ATOX1	1.54437	1.49808	1.52123	0.032732	7	7	7	76.5	76.5	76.5	7.4016	0	72.492	1589900000	551720000	1038200000	2	6	6	4	O00244	Copper transport protein ATOX1
P52758	HRSP12	1.023	1.19694	1.10997	0.122994	4	4	4	40.9	40.9	40.9	14.494	0	109.25	3023400000	931530000	2091800000	2	3	4	3	P52758	Ribonuclease UK114
P20702	ITGAX				#DIV/0!	18	17	15	21.6	21.6	19.6	127.83	0	55.825	495350000	76418000	418930000	8	14	1	1	P20702	Integrin alpha-X
Q9NYU2	UGGT1	1.49659	1.44392	1.47026	0.0372433	87	87	81	64.4	64.4	62.4	177.19	0	323.31	125950000000	28642000000	97305000000	75	80	72	68	Q9NYU2	UDP-glucose:glycoprotein glucosyltransferase 1
O14686	KMT2D	-0.46615	-0.256935	-0.361543	0.147937	73	73	72	19.6	19.6	19.4	593.38	0	113.26	1017400000	529050000	488360000	53	41	13	15	O14686	Histone-lysine N-methyltransferase 2D
Q9P2X0	DPM3	0.975287	1.03852	1.0069	0.0447125	2	2	2	23.9	23.9	23.9	10.094	0	5.7498	2841900000	866410000	1975400000	0	2	2	2	Q9P2X0	Dolichol-phosphate mannosyltransferase subunit 3
P30086	PEBP1	-0.259102	-0.189357	-0.22423	0.0493172	15	15	15	80.7	80.7	80.7	21.057	0	323.31	33246000000	15953000000	17293000000	5	13	10	14	P30086	Phosphatidylethanolamine-binding protein 1;Hippocampal cholinergic neurostimulating peptide
Q16706	MAN2A1	1.69334	1.67288	1.68311	0.0144674	59	59	58	60.9	60.9	60.2	131.14	0	323.31	16074000000	4098000000	11976000000	39	52	24	31	Q16706	Alpha-mannosidase 2
Q6ZTN6	ANKRD13D	-0.643101		-0.643101	#DIV/0!	3	3	2	5.8	5.8	5.8	58.475	0	2.979	116090000	39070000	77020000	1	3	1	0	Q6ZTN6	Ankyrin repeat domain-containing protein 13D
Q9Y276	BCS1L	1.29749	0.948473	1.12298	0.246792	16	16	16	46.3	46.3	46.3	47.534	0	55.377	2962300000	819370000	2143000000	7	13	6	3	Q9Y276	Mitochondrial chaperone BCS1
Q86YB8	ERO1LB	-0.297242		-0.297242	#DIV/0!	4	2	2	10.1	4.9	4.9	53.543	0	19.618	124010000	49090000	74917000	3	2	3	1	Q86YB8	ERO1-like protein beta
P30044	PRDX5	-0.381688	-0.00170589	-0.191697	0.268688	15	15	15	67.3	67.3	67.3	22.086	0	244.92	31008000000	13777000000	17231000000	9	14	13	14	P30044	Peroxiredoxin-5, mitochondrial
Q7Z6I6	ARHGAP30	0.0251407	1.86118	0.943158	1.29828	17	17	16	22.9	22.9	22.3	118.58	0	132.91	716560000	178870000	537690000	9	13	5	4	Q7Z6I6	Rho GTPase-activating protein 30
Q92974	ARHGEF2	0.652494	0.91585	0.784172	0.186221	56	56	55	60.3	60.3	59.6	111.54	0	323.31	43442000000	16618000000	26824000000	41	46	36	41	Q92974	Rho guanine nucleotide exchange factor 2
Q8NC51	SERBP1	-0.567141	-0.980086	-0.773614	0.291996	22	22	22	51.7	51.7	51.7	44.965	0	323.31	16114000000	8577800000	7536000000	7	13	18	13	Q8NC51	Plasminogen activator inhibitor 1 RNA-binding protein
Q9NP72	RAB18	1.32346	1.38337	1.35341	0.0423628	11	11	11	62.6	62.6	62.6	22.977	0	111.1	3013600000	690630000	2322900000	4	10	5	7	Q9NP72	Ras-related protein Rab-18
Q99497	PARK7	-0.102741	-0.126612	-0.114677	0.0168793	27	27	27	97.9	97.9	97.9	19.891	0	323.31	66732000000	30516000000	36216000000	7	22	16	23	Q99497	Protein deglycase DJ-1
Q5BJD5	TMEM41B	2.02896	2.2024	2.11568	0.122641	4	4	4	16.2	16.2	16.2	32.513	0	23.848	911910000	140220000	771690000	2	4	2	2	Q5BJD5	Transmembrane protein 41B
P39656	DDOST	0.955955	0.804204	0.88008	0.107304	23	23	23	58.1	58.1	58.1	50.8	0	323.31	61939000000	17209000000	44730000000	12	17	17	12	P39656	Dolichyl-diphosphooligosaccharide--protein glycosyltransferase 48 kDa subunit
O43924	PDE6D	1.35902		1.35902	#DIV/0!	3	3	3	28.7	28.7	28.7	17.42	0	21.458	592720000	215080000	377640000	1	1	3	1	O43924	Retinal rod rhodopsin-sensitive cGMP 3,5-cyclic phosphodiesterase subunit delta
O75351	VPS4B	0.483184	-0.103144	0.19002	0.414597	8	8	6	25	25	18.7	49.301	0	181.7	2274000000	827580000	1446400000	3	6	6	4	O75351;Q6PIW4	Vacuolar protein sorting-associated protein 4B
Q9H7C9	AAMDC	-0.468497	-0.34132	-0.404909	0.0899277	8	8	8	64.8	64.8	64.8	13.332	0	29.474	2541000000	536260000	2004800000	1	4	5	7	Q9H7C9	Mth938 domain-containing protein
P24666	ACP1	0.257741	0.545306	0.401523	0.203339	9	9	9	72.8	72.8	72.8	18.042	0	323.31	9391700000	3343100000	6048600000	5	9	8	7	P24666	Low molecular weight phosphotyrosine protein phosphatase
P84085	ARF5	0.954297	1.217	1.08565	0.185759	14	7	7	86.1	52.8	52.8	20.529	0	36.184	2830300000	1066500000	1763800000	9	10	12	13	P84085	ADP-ribosylation factor 5
Q13496	MTM1	-0.078916	-0.067758	-0.073337	0.0078899	9	9	9	19.4	19.4	19.4	69.931	0	19.48	675390000	260540000	414850000	4	5	7	3	Q13496	Myotubularin
P78559	MAP1A	2.12399	2.53702	2.33051	0.292056	71	69	69	36.5	35.6	35.6	305.48	0	284.4	2240500000	450700000	1789800000	46	61	16	18	P78559	Microtubule-associated protein 1A;MAP1A heavy chain;MAP1 light chain LC2
P04080	CSTB	-0.409872	-0.101254	-0.255563	0.218226	7	7	7	88.8	88.8	88.8	11.139	0	210.15	12675000000	6544200000	6130900000	3	5	6	6	P04080	Cystatin-B
Q9P035	HACD3	-0.276828	-0.342381	-0.309604	0.046353	11	11	11	34	34	34	43.159	0	131.53	15727000000	8089400000	7637900000	10	11	10	10	Q9P035	Very-long-chain (3R)-3-hydroxyacyl-CoA dehydratase 3
O15357	INPPL1	1.31191	1.15468	1.2333	0.111178	55	52	52	53.8	51.4	51.4	138.6	0	323.31	7597200000	2182800000	5414500000	39	41	32	27	O15357	Phosphatidylinositol 3,4,5-trisphosphate 5-phosphatase 2
O00584	RNASET2	0.0180198	0.107043	0.0625315	0.0629489	15	15	15	58.6	58.6	58.6	29.48	0	323.31	18489000000	6972700000	11516000000	6	15	9	10	O00584	Ribonuclease T2
Q96JB2	COG3		1.04453	1.04453	#DIV/0!	7	7	7	9.8	9.8	9.8	94.095	0	30.339	250400000	97438000	152960000	5	1	2	5	Q96JB2	Conserved oligomeric Golgi complex subunit 3
Q8TEA7	TBCK	0.398332		0.398332	#DIV/0!	4	4	4	6.5	6.5	6.5	100.68	0	8.1936	139930000	57041000	82894000	3	3	3	0	Q8TEA7	TBC domain-containing protein kinase-like protein
Q13813	SPTAN1	1.65819	1.58625	1.62222	0.0508693	174	174	174	67.8	67.8	67.8	284.54	0	323.31	98316000000	26396000000	71920000000	137	157	133	113	Q13813	Spectrin alpha chain, non-erythrocytic 1
Q9UL25	RAB21	0.99915	1.16368	1.08141	0.11634	14	14	14	65.8	65.8	65.8	24.347	0	322.03	12286000000	3481100000	8805000000	6	8	10	13	Q9UL25	Ras-related protein Rab-21
Q04760	GLO1	1.17946	1.16642	1.17294	0.00922067	21	21	21	89.1	89.1	89.1	20.777	0	323.31	72322000000	20319000000	52002000000	6	19	14	20	Q04760	Lactoylglutathione lyase
P53007	SLC25A1	1.0959	0.990251	1.04308	0.0747051	11	11	11	45.7	45.7	45.7	34.012	0	64.897	18367000000	3600500000	14767000000	5	9	7	6	P53007	Tricarboxylate transport protein, mitochondrial
P68036;A0A1B0GUS4	UBE2L3	0.596349	0.813386	0.704868	0.153468	9	9	9	55.2	55.2	55.2	17.861	0	251.83	23213000000	8436900000	14776000000	5	8	4	7	P68036;A0A1B0GUS4	Ubiquitin-conjugating enzyme E2 L3
P10124	SRGN	3.20538	5.01962	4.1125	1.28286	3	3	3	29.7	29.7	29.7	17.652	0	12.259	630800000	65016000	565780000	3	3	3	3	P10124	Serglycin
P21333	FLNA	0.976925	1.03348	1.0052	0.0399904	196	196	179	74.9	74.9	71.6	280.74	0	323.31	601830000000	205660000000	396170000000	158	177	167	174	P21333	Filamin-A
P09669	COX6C	-0.265915	-0.251779	-0.258847	0.00999566	12	12	12	78.7	78.7	78.7	8.7813	0	36.937	10788000000	4812500000	5975400000	2	8	10	10	P09669	Cytochrome c oxidase subunit 6C
O43252	PAPSS1	0.0161106	0.694736	0.355424	0.479861	12	11	11	23.9	21.6	21.6	70.832	0	71.925	1521000000	589600000	931350000	3	8	4	5	O43252	Bifunctional 3-phosphoadenosine 5-phosphosulfate synthase 1;Sulfate adenylyltransferase;Adenylyl-sulfate kinase
O75340	PDCD6	0.377569	0.415484	0.396526	0.02681	9	9	9	58.1	58.1	58.1	21.868	0	241.49	13616000000	4603100000	9013100000	5	9	7	7	O75340	Programmed cell death protein 6
Q92598	HSPH1	0.678919	0.590517	0.634718	0.0625097	49	46	45	64.2	60.6	59	96.864	0	323.31	54769000000	19285000000	35484000000	36	45	33	30	Q92598	Heat shock protein 105 kDa
Q9H0N5	PCBD2	1.34393	1.21097	1.27745	0.0940169	6	6	6	51.5	51.5	51.5	14.365	0	24.505	1235100000	455770000	779290000	2	5	6	5	Q9H0N5	Pterin-4-alpha-carbinolamine dehydratase 2
Q9P086	MED11	-0.057559	-0.160653	-0.109106	0.0728985	3	3	3	41.9	41.9	41.9	13.129	0	50.295	548270000	258550000	289720000	1	1	3	2	Q9P086	Mediator of RNA polymerase II transcription subunit 11
P27348	YWHAQ	-0.00646579	0.0456209	0.0195776	0.0368309	20	14	14	67.8	54.3	54.3	27.764	0	323.31	33947000000	15129000000	18818000000	8	15	19	20	P27348	14-3-3 protein theta
P53675	CLTCL1	0.235025	0.621131	0.428078	0.273018	27	2	2	14	1.7	1.7	187.03	0	15.93	2608700000	1113100000	1495600000	26	26	27	27	P53675	Clathrin heavy chain 2
Q9HBI0	PARVG	2.87336	1.24644	2.0599	1.15041	7	7	7	30.8	30.8	30.8	37.485	0	39.496	1276300000	197020000	1079300000	6	5	7	2	Q9HBI0	Gamma-parvin
Q92542	NCSTN	1.47518	1.27082	1.373	0.144504	13	13	13	26	26	26	78.41	0	293.61	11023000000	3269900000	7753600000	10	13	9	10	Q92542	Nicastrin
Q96KC8	DNAJC1	2.75212	0.480973	1.61655	1.60594	9	9	9	17.9	17.9	17.9	63.882	0	44.945	1040400000	239980000	800450000	3	9	3	4	Q96KC8	DnaJ homolog subfamily C member 1
Q15050	RRS1	-2.14519	-2.06083	-2.10301	0.0596515	10	10	10	29.9	29.9	29.9	41.193	0	78.318	1777600000	1015100000	762490000	6	1	6	3	Q15050	Ribosome biogenesis regulatory protein homolog
P42765	ACAA2	1.03328	1.27818	1.15573	0.17317	22	22	22	61.7	61.7	61.7	41.924	0	323.31	5474700000	1062700000	4412000000	8	17	14	6	P42765	3-ketoacyl-CoA thiolase, mitochondrial
Q10588	BST1				#DIV/0!	5	5	5	21.4	21.4	21.4	35.724	0	52.602	315440000	30936000	284500000	4	4	2	1	Q10588	ADP-ribosyl cyclase/cyclic ADP-ribose hydrolase 2
Q9UKZ1	CNOT11	0.350275	0.681082	0.515678	0.233916	8	8	8	22.7	22.7	22.7	55.215	0	59.811	1154400000	498760000	655640000	4	3	6	4	Q9UKZ1	CCR4-NOT transcription complex subunit 11
P23467	PTPRB		0.948264	0.948264	#DIV/0!	8	8	8	4.4	4.4	4.4	224.3	0	4.1017	283000000	134230000	148770000	5	3	1	2	P23467;Q16827	Receptor-type tyrosine-protein phosphatase beta
Q86VN1	VPS36	0.353416	0.0501381	0.201777	0.21445	13	13	13	42.2	42.2	42.2	43.816	0	88.044	2545700000	1046800000	1498900000	5	5	12	4	Q86VN1	Vacuolar protein-sorting-associated protein 36
Q92930	RAB8B	1.40631	1.30883	1.35757	0.0689288	9	4	4	39.6	19.8	19.8	23.584	0	25.437	1686300000	272990000	1413300000	4	9	6	7	Q92930	Ras-related protein Rab-8B
Q86YS6	RAB43	1.19788		1.19788	#DIV/0!	3	3	3	23.1	23.1	23.1	23.339	0	59.76	227770000	41948000	185820000	2	2	2	2	Q86YS6	Ras-related protein Rab-43
P22681	CBL	2.32226	3.34943	2.83584	0.726319	15	15	15	21.6	21.6	21.6	99.632	0	47.649	1409700000	227810000	1181900000	7	13	6	4	P22681	E3 ubiquitin-protein ligase CBL
Q9BRT2	UQCC2	0.0250837	-0.0556136	-0.015265	0.0570616	7	7	7	41.3	41.3	41.3	14.875	0	27.711	2377900000	1017100000	1360800000	4	5	4	4	Q9BRT2	Ubiquinol-cytochrome-c reductase complex assembly factor 2
P40306	PSMB10	2.57082	2.64361	2.60721	0.0514703	11	11	11	54.2	54.2	54.2	28.936	0	322.01	8142500000	1217900000	6924600000	2	9	7	5	P40306	Proteasome subunit beta type-10
Q53GS9	USP39	0.191951	0.194229	0.19309	0.00161079	18	18	18	37.9	37.9	37.9	65.38	0	146.19	8278800000	3710100000	4568700000	10	13	10	13	Q53GS9	U4/U6.U5 tri-snRNP-associated protein 2
P16284	PECAM1	-0.159799	-0.675899	-0.417849	0.364938	33	33	33	52	52	52	82.521	0	323.31	7035800000	1317600000	5718200000	22	29	11	9	P16284	Platelet endothelial cell adhesion molecule
P37802	TAGLN2	-0.188769	-0.213673	-0.201221	0.0176098	21	21	20	90.5	90.5	83.4	22.391	0	323.31	75196000000	35073000000	40123000000	12	16	17	20	P37802	Transgelin-2
L0R6Q1	SLC35A4	0.967185	0.936131	0.951658	0.0219585	10	10	10	93.2	93.2	93.2	11.133	0	175.44	5043400000	1760600000	3282700000	7	8	9	9	L0R6Q1
P00387	CYB5R3	1.39506	1.38753	1.3913	0.00532451	20	20	20	77.1	77.1	77.1	34.234	0	323.31	23274000000	6235200000	17039000000	12	16	13	10	P00387	NADH-cytochrome b5 reductase 3;NADH-cytochrome b5 reductase 3 membrane-bound form;NADH-cytochrome b5 reductase 3 soluble form
P14314	PRKCSH	0.530114	0.495273	0.512694	0.0246363	23	23	23	47.3	47.3	47.3	59.425	0	323.31	44353000000	12774000000	31579000000	14	21	17	12	P14314	Glucosidase 2 subunit beta
P28288	ABCD3	2.17376	2.04364	2.1087	0.0920087	17	17	17	28.5	28.5	28.5	75.475	0	171.98	3051700000	803460000	2248300000	7	10	10	9	P28288	ATP-binding cassette sub-family D member 3
P07099	EPHX1	0.804661	0.809878	0.80727	0.00368898	20	20	20	61.5	61.5	61.5	52.948	0	287.8	8218600000	2713200000	5505400000	8	19	12	6	P07099	Epoxide hydrolase 1
P07954	FH	0.026755	-0.03901	-0.00612746	0.0465029	18	18	18	54.3	54.3	54.3	54.636	0	323.31	18052000000	6582700000	11469000000	10	15	18	10	P07954	Fumarate hydratase, mitochondrial
Q03154	ACY1	0.458417	0.130181	0.294299	0.232098	15	15	15	50.5	50.5	50.5	45.884	0	104.59	2937800000	1263100000	1674700000	6	8	9	6	Q03154	Aminoacylase-1
Q9UKL6	PCTP	0.367793	0.253714	0.310754	0.080666	6	6	6	31.8	31.8	31.8	24.843	0	14.378	381060000	122330000	258730000	1	4	2	3	Q9UKL6	Phosphatidylcholine transfer protein
Q13469	NFATC2	1.93561		1.93561	#DIV/0!	3	3	3	4.3	4.3	4.3	100.14	0	2.885	96189000	36893000	59296000	3	1	2	0	Q13469	Nuclear factor of activated T-cells, cytoplasmic 2
Q9NU22	MDN1	0.54323	0.359384	0.451307	0.129999	267	267	266	55.5	55.5	55.4	632.81	0	323.31	54113000000	28629000000	25484000000	205	168	201	254	Q9NU22	Midasin
Q16718	NDUFA5	0.0994543	0.282443	0.190949	0.129393	7	7	7	67.2	67.2	67.2	13.459	0	129.04	8640400000	4377100000	4263300000	3	4	5	5	Q16718	NADH dehydrogenase [ubiquinone] 1 alpha subcomplex subunit 5
P48735	IDH2	0.072145	0.104083	0.0881138	0.0225836	24	24	23	49.6	49.6	49.6	50.909	0	323.31	45203000000	19494000000	25709000000	11	21	22	10	P48735	Isocitrate dehydrogenase [NADP], mitochondrial
O75352	MPDU1	-1.23148	-1.19321	-1.21235	0.027061	3	3	3	13.8	13.8	13.8	26.638	0	6.9778	5733900000	2973600000	2760300000	3	3	3	3	O75352	Mannose-P-dolichol utilization defect 1 protein
Q99436	PSMB7	-0.212601	0.194558	-0.0090214	0.287905	12	12	12	61	61	61	29.965	0	300.03	8725600000	3671500000	5054100000	5	9	8	7	Q99436	Proteasome subunit beta type-7
Q53GQ0	HSD17B12	1.05114	1.02892	1.04003	0.0157119	18	18	18	57.7	57.7	57.7	34.324	0	323.31	33376000000	8147600000	25228000000	9	17	13	10	Q53GQ0	Very-long-chain 3-oxoacyl-CoA reductase
P36957	DLST	-0.328501	-0.566276	-0.447388	0.168132	10	10	10	26.3	26.3	26.3	48.755	0	130.3	12904000000	5841400000	7062300000	9	7	9	5	P36957	Dihydrolipoyllysine-residue succinyltransferase component of 2-oxoglutarate dehydrogenase complex, mitochondrial
Q9BQ95	ECSIT	0.0202506	0.35983	0.19004	0.240119	10	10	10	43.6	43.6	43.6	49.148	0	159.87	1409900000	625570000	784370000	3	5	8	4	Q9BQ95	Evolutionarily conserved signaling intermediate in Toll pathway, mitochondrial
Q9UL46	PSME2	1.16651	1.07658	1.12154	0.0635901	19	19	19	78.2	78.2	78.2	27.401	0	323.31	40622000000	9594500000	31028000000	11	16	18	11	Q9UL46	Proteasome activator complex subunit 2
O95834	EML2	0.519463	0.599542	0.559502	0.0566244	16	16	16	34.4	34.4	34.4	70.678	0	216.85	1706200000	441780000	1264400000	5	12	9	2	O95834;O00423	Echinoderm microtubule-associated protein-like 2
Q8TB24	RIN3	1.71966		1.71966	#DIV/0!	6	6	6	8.6	8.6	8.6	107.85	0	11.833	485910000	242480000	243430000	4	2	4	0	Q8TB24	Ras and Rab interactor 3
P54920	NAPA	0.763392	0.697284	0.730338	0.0467454	19	19	19	76.3	76.3	76.3	33.232	0	323.31	26501000000	10492000000	16009000000	8	13	17	10	P54920;Q9H115	Alpha-soluble NSF attachment protein
O15554	KCNN4	-1.19969		-1.19969	#DIV/0!	6	6	6	12.4	12.4	12.4	47.695	0	6.718	175480000	83824000	91659000	4	5	4	0	O15554	Intermediate conductance calcium-activated potassium channel protein 4
P32321	DCTD	0.199864	0.572188	0.386026	0.263273	5	5	5	37.6	37.6	37.6	20.016	0	95.266	1616400000	729920000	886460000	2	3	3	3	P32321	Deoxycytidylate deaminase
Q15382	RHEB	2.01549	2.05812	2.0368	0.030144	8	8	8	48.4	48.4	48.4	20.497	0	145.44	2616700000	609140000	2007500000	4	7	2	5	Q15382	GTP-binding protein Rheb
P80303	NUCB2	0.973539	0.663979	0.818759	0.218892	11	11	11	32.9	32.9	32.9	50.222	0	274.02	3468900000	905810000	2563100000	5	8	7	5	P80303	Nucleobindin-2;Nesfatin-1
P62333	PSMC6	-0.115181	-0.32939	-0.222286	0.151469	21	21	21	66.8	66.8	66.8	44.172	0	139.96	15502000000	7284600000	8217200000	5	15	16	9	P62333	26S protease regulatory subunit 10B
P55008	AIF1				#DIV/0!	6	6	6	42.2	42.2	42.2	16.703	0	82.767	1418500000	140390000	1278100000	3	4	2	4	P55008	Allograft inflammatory factor 1
P56385	ATP5I	0.795225	0.839962	0.817594	0.0316338	8	8	8	71	71	71	7.9331	0	30.992	21009000000	7825000000	13184000000	6	5	6	7	P56385	ATP synthase subunit e, mitochondrial
Q9P260	KIAA1468	0.289632	0.448199	0.368915	0.112124	12	12	12	14.6	14.6	14.6	134.63	0	39.023	435320000	200580000	234740000	5	4	5	5	Q9P260	LisH domain and HEAT repeat-containing protein KIAA1468
Q9BQC6	MRPL57	-0.194356	-0.123594	-0.158975	0.0500363	3	3	3	32.4	32.4	32.4	12.266	0	18.421	1060600000	563220000	497340000	0	1	2	3	Q9BQC6	Ribosomal protein 63, mitochondrial
Q9HCN8	SDF2L1	1.74711	1.58796	1.66753	0.112536	7	7	7	63.3	63.3	63.3	23.598	0	323.31	3823400000	871820000	2951600000	3	5	5	7	Q9HCN8	Stromal cell-derived factor 2-like protein 1
Q92614	MYO18A	1.58382	1.31652	1.45017	0.18901	81	81	81	50.3	50.3	50.3	233.11	0	323.31	11827000000	3163400000	8663500000	51	53	42	40	Q92614	Unconventional myosin-XVIIIa
Q9NS69	TOMM22	1.24304	1.39384	1.31844	0.106632	8	8	8	79.6	79.6	79.6	15.521	0	323.31	28179000000	7087100000	21092000000	7	7	7	7	Q9NS69	Mitochondrial import receptor subunit TOM22 homolog
Q16611	BAK1	1.99263	2.37268	2.18266	0.268736	10	10	10	64.9	64.9	64.9	23.408	0	99.275	2755100000	552030000	2203100000	4	9	6	7	Q16611	Bcl-2 homologous antagonist/killer
P09543	CNP	1.23273	1.08332	1.15803	0.105649	16	16	16	39.2	39.2	39.2	47.578	0	134.45	3776700000	1129700000	2647000000	4	11	10	3	P09543	2,3-cyclic-nucleotide 3-phosphodiesterase
P16949	STMN1	-0.877497	-0.565016	-0.721257	0.220957	18	18	14	66.4	66.4	55	17.302	0	99.516	31946000000	16795000000	15150000000	5	14	13	12	P16949;Q9H169	Stathmin
P10321	HLA-C	1.15376	1.70662	1.43019	0.390931	8	1	1	30.9	4.4	4.4	40.648	0	20.857	1083400000	282970000	800430000	3	6	5	2	P10321	HLA class I histocompatibility antigen, Cw-7 alpha chain
Q02878	RPL6	-0.159294	-0.208031	-0.183663	0.0344623	23	23	23	53.1	53.1	53.1	32.728	0	312.21	36595000000	20828000000	15766000000	19	18	23	19	Q02878	60S ribosomal protein L6
Q6NUK1	SLC25A24	1.34947	1.41993	1.3847	0.0498227	20	20	20	44.4	44.4	44.4	53.354	0	96.668	6111100000	1065800000	5045300000	6	12	9	6	Q6NUK1	Calcium-binding mitochondrial carrier protein SCaMC-1
O43464	HTRA2	-1.45217	-1.67215	-1.56216	0.155549	7	7	7	24.5	24.5	24.5	48.84	0	55.643	930650000	637600000	293040000	3	2	6	2	O43464;P83110	Serine protease HTRA2, mitochondrial
P61586	RHOA	0.412187	0.64882	0.530504	0.167325	13	13	4	62.7	62.7	15	21.768	0	323.31	45153000000	12938000000	32216000000	8	12	11	12	P61586	Transforming protein RhoA
Q16864	ATP6V1F	0.899929	0.790279	0.845104	0.0775343	6	6	6	49.6	49.6	49.6	13.37	0	23.573	1227400000	470050000	757380000	2	2	5	5	Q16864	V-type proton ATPase subunit F
Q9BTE7	DCUN1D5	-0.366615	-0.0034911	-0.185053	0.256767	8	8	7	35.4	35.4	32.5	27.508	0	23.332	1702100000	748730000	953410000	2	5	7	7	Q9BTE7	DCN1-like protein 5
Q8N5K1	CISD2	-0.40624	-0.312226	-0.359233	0.0664779	12	12	12	64.4	64.4	64.4	15.278	0	109.28	15117000000	7752200000	7364300000	6	8	9	11	Q8N5K1	CDGSH iron-sulfur domain-containing protein 2
P14324	FDPS	0.266182	-0.0173693	0.124406	0.200501	13	13	13	34.8	34.8	34.8	48.275	0	323.31	11496000000	3815700000	7680700000	9	9	9	6	P14324	Farnesyl pyrophosphate synthase
Q9BZZ5	API5	-0.324645	-0.198344	-0.261494	0.0893083	19	19	19	38.2	38.2	38.2	59.004	0	163.02	8970000000	3038100000	5932000000	6	14	7	9	Q9BZZ5	Apoptosis inhibitor 5
P22061	PCMT1	-1.59992	-1.54825	-1.57409	0.0365362	17	17	17	85	85	85	24.636	0	323.31	29450000000	20618000000	8831900000	10	11	15	14	P22061	Protein-L-isoaspartate(D-aspartate) O-methyltransferase
Q9BT78	COPS4	0.455018	0.657907	0.556463	0.143464	22	22	22	65	65	65	46.268	0	323.31	7029800000	2404100000	4625700000	6	14	17	5	Q9BT78	COP9 signalosome complex subunit 4
Q5BJF2	TMEM97	0.0633967	0.342809	0.203103	0.197574	4	4	4	18.8	18.8	18.8	20.848	0	9.7482	2850000000	1167800000	1682200000	3	3	4	2	Q5BJF2	Transmembrane protein 97
Q9UHA4	LAMTOR3	-1.25836	-1.20234	-1.23035	0.0396121	8	8	8	62.1	62.1	62.1	13.623	0	302.82	7065900000	3852500000	3213500000	6	5	7	6	Q9UHA4	Ragulator complex protein LAMTOR3
P04844	RPN2	0.959045	0.815419	0.887232	0.101559	27	27	27	58	58	58	69.283	0	323.31	97082000000	27292000000	69790000000	24	25	25	24	P04844	Dolichyl-diphosphooligosaccharide--protein glycosyltransferase subunit 2
P43007	SLC1A4	0.91911	2.39559	1.65735	1.04403	7	7	7	20.5	20.5	20.5	55.722	0	28.658	757490000	132850000	624650000	4	6	4	1	P43007	Neutral amino acid transporter A
P61018	RAB4B	0.449092	0.518522	0.483807	0.0490944	10	8	8	55.4	48.8	48.8	23.586	0	39.941	1809300000	446550000	1362700000	2	8	6	6	P61018	Ras-related protein Rab-4B
P01871;P0DOX6	IGHM				#DIV/0!	2	2	2	10.4	10.4	10.4	49.439	0	5.5655	9898400	5974700	3923700	2	0	0	0	P01871;P0DOX6	Ig mu chain C region
Q9H4L7	SMARCAD1	-0.476263	-0.383706	-0.429985	0.0654477	21	21	21	30.4	30.4	30.4	117.4	0	184.55	3417500000	2162800000	1254700000	14	4	13	17	Q9H4L7	SWI/SNF-related matrix-associated actin-dependent regulator of chromatin subfamily A containing DEAD/H box 1
Q9UHV9	PFDN2	0.50329	0.604293	0.553791	0.0714199	7	7	7	55.8	55.8	55.8	16.648	0	152.47	8169700000	3002600000	5167100000	2	6	4	3	Q9UHV9	Prefoldin subunit 2
P27986	PIK3R1	1.95534	1.54188	1.74861	0.29236	21	20	20	30.5	29.6	29.6	83.597	0	126.1	1811000000	318440000	1492600000	8	18	5	7	P27986;Q92569	Phosphatidylinositol 3-kinase regulatory subunit alpha
Q16543	CDC37	-5.01988e-05	0.0933737	0.0466618	0.0660607	14	14	14	47.6	47.6	47.6	44.468	0	323.31	9683900000	4225400000	5458600000	6	10	9	6	Q16543	Hsp90 co-chaperone Cdc37;Hsp90 co-chaperone Cdc37, N-terminally processed
Q9Y240	CLEC11A				#DIV/0!	7	7	7	23.8	23.8	23.8	35.694	0	17.068	3492200000	1725300000	1767000000	1	7	1	1	Q9Y240	C-type lectin domain family 11 member A
O14530	TXNDC9	0.870229	0.692671	0.78145	0.125552	8	8	8	39.8	39.8	39.8	26.534	0	37.186	1538700000	529880000	1008800000	2	4	5	3	O14530	Thioredoxin domain-containing protein 9
O75165	DNAJC13	1.44355	1.44438	1.44397	0.000586899	109	109	109	56.8	56.8	56.8	254.41	0	323.31	25913000000	7531400000	18382000000	85	92	65	71	O75165	DnaJ homolog subfamily C member 13
Q9UBX3	SLC25A10	0.198679	0.210562	0.204621	0.00840255	14	14	14	59.2	59.2	59.2	31.282	0	323.31	11189000000	3414900000	7773900000	5	13	11	6	Q9UBX3	Mitochondrial dicarboxylate carrier
P61088	UBE2N	-0.645837	-0.424551	-0.535194	0.156473	11	11	11	53.3	53.3	53.3	17.138	0	150.68	23613000000	11661000000	11951000000	7	8	8	10	P61088;Q5JXB2	Ubiquitin-conjugating enzyme E2 N
P30041	PRDX6	0.354985	0.442132	0.398558	0.0616222	30	30	30	87.1	87.1	87.1	25.035	0	323.31	232890000000	89489000000	143400000000	15	22	23	29	P30041	Peroxiredoxin-6
P49189	ALDH9A1	1.77187	1.62032	1.6961	0.107162	18	18	18	44.9	44.9	44.9	53.801	0	184.3	6260400000	1659200000	4601100000	8	7	13	7	P49189	4-trimethylaminobutyraldehyde dehydrogenase
O43488	AKR7A2	1.89244	1.88624	1.88934	0.00438406	14	14	14	54.9	54.9	54.9	39.589	0	122.4	14124000000	2835600000	11288000000	4	12	12	8	O43488;Q8NHP1;O95154	Aflatoxin B1 aldehyde reductase member 2
O60888	CUTA	0.0856614	-0.0948181	-0.00457836	0.127618	7	7	7	49.2	49.2	49.2	19.116	0	86.459	9379200000	4607700000	4771400000	4	5	6	4	O60888	Protein CutA
Q15370	TCEB2	0.0221931	0.285708	0.153951	0.186333	11	11	11	91.5	91.5	91.5	13.133	0	98.796	8166000000	4209800000	3956300000	5	6	11	8	Q15370	Transcription elongation factor B polypeptide 2
Q9NR33	POLE4				#DIV/0!	3	3	3	46.2	46.2	46.2	12.209	0	20.591	154800000	66879000	87921000	1	1	3	2	Q9NR33	DNA polymerase epsilon subunit 4
P14384	CPM				#DIV/0!	4	4	4	11.1	11.1	11.1	50.513	0	24.42	473980000	34676000	439310000	3	4	3	0	P14384	Carboxypeptidase M
Q9NXD2	MTMR10	0.811404	0.905296	0.85835	0.0663917	4	4	4	8.8	8.8	8.8	88.272	0	9.9855	921420000	421870000	499550000	2	2	2	2	Q9NXD2	Myotubularin-related protein 10
O94966	USP19	0.680606	0.605446	0.643026	0.0531461	30	30	30	33.1	33.1	33.1	145.65	0	323.31	2810300000	1092700000	1717600000	18	19	23	15	O94966	Ubiquitin carboxyl-terminal hydrolase 19
P60520	GABARAPL2	0.725785	0.98669	0.856238	0.184488	5	5	4	40.2	40.2	40.2	13.667	0	7.9563	1294000000	556520000	737450000	2	1	3	3	P60520	Gamma-aminobutyric acid receptor-associated protein-like 2
O14925;Q5SRD1	TIMM23;TIMM23B	0.984437	0.818239	0.901338	0.11752	6	6	6	51.2	51.2	51.2	21.943	0	133.66	1945800000	523850000	1422000000	3	6	3	2	O14925;Q5SRD1	Mitochondrial import inner membrane translocase subunit Tim23;Putative mitochondrial import inner membrane translocase subunit Tim23B
Q9NQC3	RTN4	0.617199	0.276518	0.446859	0.240898	11	11	11	20.3	20.3	20.3	129.93	0	296.48	5428300000	1419900000	4008400000	8	9	8	6	Q9NQC3	Reticulon-4
P42773	CDKN2C	0.588841	0.859207	0.724024	0.191178	7	7	7	45.2	45.2	45.2	18.127	0	172.19	2411900000	807230000	1604700000	2	6	3	6	P42773	Cyclin-dependent kinase 4 inhibitor C
P34949	MPI	-0.658648	-1.22743	-0.943036	0.40219	11	11	11	36.4	36.4	36.4	46.655	0	118.62	3899900000	1909800000	1990100000	9	7	9	4	P34949	Mannose-6-phosphate isomerase
Q53EP0	FNDC3B	2.93373	2.02446	2.47909	0.642951	13	13	13	15	15	15	132.89	0	117.71	416660000	64840000	351820000	4	2	8	7	Q53EP0	Fibronectin type III domain-containing protein 3B
P61077	UBE2D3	0.0654023	0.0624439	0.0639231	0.0020919	4	4	1	40.8	40.8	4.8	16.687	0	161.17	11567000000	5484400000	6082600000	2	2	3	3	P61077	Ubiquitin-conjugating enzyme E2 D3
P49585	PCYT1A	0.612618	0.406987	0.509802	0.145403	9	9	9	37.3	37.3	37.3	41.731	0	48.267	2019200000	718970000	1300200000	4	7	6	4	P49585;Q9Y5K3	Choline-phosphate cytidylyltransferase A
Q13438	OS9	1.75163	1.60657	1.6791	0.102573	16	16	16	37.3	37.3	37.3	75.561	0	147.16	1879000000	365590000	1513400000	5	13	7	8	Q13438	Protein OS-9
P13929	ENO3				#DIV/0!	6	2	2	23.3	10.1	10.1	46.986	0	2.9084	2097500000	1223400000	874030000	6	5	4	5	P13929	Beta-enolase
Q8WUW1	BRK1	0.73473	0.843741	0.789235	0.0770824	7	7	7	77.3	77.3	77.3	8.7448	0	14.657	1088100000	473440000	614680000	1	5	6	4	Q8WUW1	Protein BRICK1
Q9Y333	LSM2	0.256247	0.304858	0.280553	0.0343732	10	10	10	82.1	82.1	82.1	10.834	0	282.06	19075000000	8781800000	10293000000	5	8	9	8	Q9Y333	U6 snRNA-associated Sm-like protein LSm2
P50991	CCT4	0.621902	0.51663	0.569266	0.0744385	34	34	34	70.1	70.1	70.1	57.924	0	323.31	90629000000	28240000000	62389000000	18	29	26	20	P50991	T-complex protein 1 subunit delta
P38606	ATP6V1A	0.623512	0.417924	0.520718	0.145373	33	33	33	66.5	66.5	66.5	68.303	0	323.31	25026000000	7901900000	17124000000	21	31	18	20	P38606	V-type proton ATPase catalytic subunit A
Q6P1A2	LPCAT3	0.40824	0.397575	0.402907	0.00754129	11	11	11	21.6	21.6	21.6	56.034	0	106.56	3923000000	1366900000	2556200000	9	9	10	9	Q6P1A2	Lysophospholipid acyltransferase 5
Q13616	CUL1	-0.179423	-0.217049	-0.198236	0.0266056	40	40	40	56.8	56.8	56.8	89.677	0	323.31	11047000000	5155300000	5892200000	19	31	16	20	Q13616	Cullin-1
Q92747	ARPC1A	0.107315	-0.305772	-0.0992285	0.292097	5	4	4	20.5	14.3	14.3	41.569	0	38.565	2214200000	1313700000	900580000	3	4	4	3	Q92747	Actin-related protein 2/3 complex subunit 1A
Q2TAA2	IAH1	1.79147	1.20499	1.49823	0.414704	7	7	7	50.8	50.8	50.8	27.598	0	62.793	794690000	204630000	590070000	5	5	6	3	Q2TAA2	Isoamyl acetate-hydrolyzing esterase 1 homolog
Q9NZQ3	NCKIPSD	-0.00588166	0.960103	0.477111	0.683054	13	13	13	19	19	19	78.959	0	42.398	716620000	194490000	522120000	4	11	5	3	Q9NZQ3	NCK-interacting protein with SH3 domain
P23526	AHCY	1.3686	1.09108	1.22984	0.196236	29	29	29	59.5	59.5	59.5	47.716	0	228.99	40456000000	9236100000	31219000000	8	20	22	9	P23526	Adenosylhomocysteinase
O15118	NPC1	1.50126	1.58803	1.54464	0.0613557	19	19	19	17.8	17.8	17.8	142.17	0	102.69	2797800000	622130000	2175600000	13	18	8	7	O15118	Niemann-Pick C1 protein
Q9Y4E8	USP15	2.8726	1.06515	1.96888	1.27806	35	35	33	42	42	40.1	112.42	0	147.29	1846200000	245230000	1601000000	20	20	14	12	Q9Y4E8	Ubiquitin carboxyl-terminal hydrolase 15
Q96KA5	CLPTM1L	1.91381	1.5485	1.73115	0.258313	8	8	8	27.3	27.3	27.3	62.228	0	63.166	2603200000	581120000	2022000000	5	8	7	6	Q96KA5	Cleft lip and palate transmembrane protein 1-like protein
Q9Y5B6	PAXBP1	-0.213822	-0.299664	-0.256743	0.0606995	18	18	18	27.3	27.3	27.3	104.8	0	91.733	897180000	458360000	438820000	13	4	7	7	Q9Y5B6	PAX3- and PAX7-binding protein 1
Q709C8	VPS13C	0.132665	0.143941	0.138303	0.00797334	174	174	173	55.7	55.7	55.7	422.39	0	323.31	35665000000	17272000000	18393000000	135	134	116	146	Q709C8;REV__Q8NEL9	Vacuolar protein sorting-associated protein 13C
Q5JS37	NHLRC3	1.02088		1.02088	#DIV/0!	2	2	2	11.5	11.5	11.5	38.282	0	3.23	166910000	44835000	122070000	1	2	1	1	Q5JS37	NHL repeat-containing protein 3
Q5JTV8	TOR1AIP1	-0.652881	-0.628917	-0.640899	0.0169451	14	14	13	34.6	34.6	32.9	66.248	0	133.78	4094800000	1701400000	2393400000	5	7	12	6	Q5JTV8	Torsin-1A-interacting protein 1
O00193	SMAP				#DIV/0!	2	2	2	12.6	12.6	12.6	20.332	0	81.968	443710000	101570000	342140000	0	2	1	1	O00193	Small acidic protein
P40925	MDH1	0.933943	0.727675	0.830809	0.145854	17	17	17	51.5	51.5	51.5	36.426	0	200.89	35408000000	10745000000	24662000000	8	14	13	9	P40925	Malate dehydrogenase, cytoplasmic
Q15833	STXBP2	1.16368	0.941476	1.05258	0.157122	24	24	24	47	47	47	66.452	0	323.31	11617000000	3577000000	8040100000	13	19	16	20	Q15833	Syntaxin-binding protein 2
P42226	STAT6	1.28978	0.616937	0.953358	0.475772	14	13	13	20.7	19.8	19.8	94.134	0	113.56	1606600000	569090000	1037500000	10	6	5	2	P42226	Signal transducer and activator of transcription 6
Q9Y2Q3	GSTK1	0.388981	0.51108	0.45003	0.086337	14	14	14	69	69	69	25.497	0	144.27	10116000000	3867600000	6248700000	6	12	13	9	Q9Y2Q3	Glutathione S-transferase kappa 1
P47712	PLA2G4A	0.581437	0.541715	0.561576	0.0280877	10	10	10	17.5	17.5	17.5	85.238	0	21.516	572910000	241480000	331430000	5	5	5	3	P47712	Cytosolic phospholipase A2;Phospholipase A2;Lysophospholipase
Q9Y266	NUDC	-0.677056	-0.377632	-0.527344	0.211725	17	17	17	53.8	53.8	53.8	38.242	0	108.48	9976900000	3712300000	6264700000	3	15	13	6	Q9Y266	Nuclear migration protein nudC
Q96CM8	ACSF2	3.06416	2.76968	2.91692	0.208229	12	12	12	29.8	29.8	29.8	68.124	0	133.73	2249300000	309560000	1939700000	3	9	8	4	Q96CM8	Acyl-CoA synthetase family member 2, mitochondrial
O00754	MAN2B1	1.35368	1.97831	1.666	0.44168	24	24	24	32.8	32.8	32.8	113.74	0	323.31	15834000000	3762600000	12071000000	15	20	17	17	O00754	Lysosomal alpha-mannosidase;Lysosomal alpha-mannosidase A peptide;Lysosomal alpha-mannosidase B peptide;Lysosomal alpha-mannosidase C peptide;Lysosomal alpha-mannosidase D peptide;Lysosomal alpha-mannosidase E peptide
P98171	ARHGAP4	1.36712	1.47623	1.42168	0.0771524	35	35	35	42.6	42.6	42.6	105.02	0	294.93	7767800000	2027100000	5740700000	25	31	14	18	P98171	Rho GTPase-activating protein 4
Q969Q0	RPL36AL	-0.0734691	-0.0602206	-0.0668448	0.0093681	9	9	2	48.1	48.1	9.4	12.469	0	29.894	5081500000	2626600000	2455000000	0	6	9	7	Q969Q0	60S ribosomal protein L36a-like
Q6P589	TNFAIP8L2	0.748996	1.24077	0.994882	0.347737	5	5	5	44.6	44.6	44.6	20.555	0	112.16	3028300000	1176200000	1852100000	2	5	4	4	Q6P589	Tumor necrosis factor alpha-induced protein 8-like protein 2
Q92990	GLMN	0.672807	0.674704	0.673756	0.00134138	14	14	14	28.5	28.5	28.5	68.207	0	131.47	5088700000	1963100000	3125600000	9	9	10	10	Q92990	Glomulin
P49720	PSMB3	0.567642	0.53865	0.553146	0.0205004	17	17	17	61.5	61.5	61.5	22.949	0	184.83	26006000000	9612900000	16393000000	8	14	11	15	P49720	Proteasome subunit beta type-3
Q13905	RAPGEF1				#DIV/0!	5	5	5	4.5	4.5	4.5	120.55	0.00068517	2.7276	63315000	26983000	36331000	4	2	0	0	Q13905	Rap guanine nucleotide exchange factor 1
Q9NZJ9	NUDT4	-2.11	-2.31086	-2.21043	0.142029	7	6	1	63.9	60	5.6	20.306	0	68.463	2367200000	1835100000	532040000	1	3	5	7	Q9NZJ9	Diphosphoinositol polyphosphate phosphohydrolase 2
O15121	DEGS1	-0.515129		-0.515129	#DIV/0!	5	5	5	26.3	26.3	26.3	37.866	0	102.7	1613700000	206940000	1406800000	2	5	2	1	O15121	Sphingolipid delta(4)-desaturase DES1
Q9NQW7	XPNPEP1	0.748996	0.813951	0.781474	0.0459301	26	26	25	60.2	60.2	59.1	69.917	0	323.31	14291000000	4532300000	9758500000	13	22	15	14	Q9NQW7	Xaa-Pro aminopeptidase 1
P62316	SNRPD2	-0.341334	-0.323455	-0.332395	0.0126424	13	13	13	71.2	71.2	71.2	13.527	0	228.77	24998000000	12606000000	12392000000	7	11	11	11	P62316	Small nuclear ribonucleoprotein Sm D2
Q5J8M3	EMC4	0.171904	-0.0241731	0.0738656	0.138647	8	8	8	54.1	54.1	54.1	20.086	0	21.143	724890000	218790000	506100000	3	5	4	2	Q5J8M3	ER membrane protein complex subunit 4
Q9NZA1;Q96NY7	CLIC5;CLIC6				#DIV/0!	3	2	2	6.3	4.4	4.4	46.502	0	11.943	228860000	103570000	125290000	3	1	2	2	Q9NZA1;Q96NY7	Chloride intracellular channel protein 5;Chloride intracellular channel protein 6
Q9Y4Z0	LSM4	0.401539	0.521624	0.461581	0.0849129	8	8	8	56.1	56.1	56.1	15.35	0	38.259	6109600000	2635400000	3474200000	3	6	8	6	Q9Y4Z0	U6 snRNA-associated Sm-like protein LSm4
Q7L1V2	MON1B				#DIV/0!	3	3	3	9.1	9.1	9.1	59.217	0	18.168	66126000	17718000	48408000	3	0	1	0	Q7L1V2	Vacuolar fusion protein MON1 homolog B
P60468	SEC61B	1.3626	1.59503	1.47881	0.164353	4	4	4	38.5	38.5	38.5	9.9743	0	19.708	8868200000	1713200000	7154900000	1	4	3	3	P60468	Protein transport protein Sec61 subunit beta
P09110	ACAA1	1.71491	1.26014	1.48752	0.321571	12	12	12	53.3	53.3	53.3	44.292	0	83.866	3553500000	754910000	2798600000	8	7	9	3	P09110	3-ketoacyl-CoA thiolase, peroxisomal
Q96FJ2	DYNLL2	-0.420027	-0.498675	-0.459351	0.0556125	6	3	3	65.2	39.3	39.3	10.35	0	24.141	513850000	173420000	340430000	1	6	4	5	Q96FJ2	Dynein light chain 2, cytoplasmic
O95674	CDS2	0.360463	-0.368944	-0.00424047	0.515769	4	4	4	15.1	15.1	15.1	51.417	0	49.924	1101500000	339610000	761920000	2	4	3	3	O95674	Phosphatidate cytidylyltransferase 2
Q9H8Y5	ANKZF1				#DIV/0!	7	7	7	16.1	16.1	16.1	80.926	0	87.043	457320000	176070000	281250000	7	3	1	2	Q9H8Y5	Ankyrin repeat and zinc finger domain-containing protein 1
Q08722	CD47	0.183049	-0.0364361	0.0733066	0.155199	3	3	3	8.7	8.7	8.7	35.213	0	3.731	6260100000	2558000000	3702000000	3	3	2	3	Q08722	Leukocyte surface antigen CD47
O15031	PLXNB2	1.39275	1.18659	1.28967	0.145777	46	46	45	37.7	37.7	37.3	205.12	0	323.31	3384900000	611650000	2773200000	29	38	22	15	O15031;O60486	Plexin-B2
Q8IYS2	KIAA2013	0.564592	0.71992	0.642256	0.109833	7	7	7	16.2	16.2	16.2	69.156	0	46.262	818780000	332750000	486040000	5	2	3	3	Q8IYS2	Uncharacterized protein KIAA2013
P52566	ARHGDIB	0.614371	0.718604	0.666487	0.0737039	23	23	23	84.6	84.6	84.6	22.988	0	323.31	105440000000	35477000000	69962000000	8	18	18	18	P52566	Rho GDP-dissociation inhibitor 2
Q9Y5Y2	NUBP2	-0.0830122	-0.270866	-0.176939	0.132833	6	6	6	35.1	35.1	35.1	28.825	0	52.322	2524700000	1486700000	1038000000	3	5	5	4	Q9Y5Y2	Cytosolic Fe-S cluster assembly factor NUBP2
Q5NDL2	EOGT	-0.268036	-0.046894	-0.157465	0.156371	10	10	10	22.2	22.2	22.2	62.01	0	25.093	971700000	438350000	533350000	3	6	9	5	Q5NDL2	EGF domain-specific O-linked N-acetylglucosamine transferase
P08621	SNRNP70	-0.952465	-1.48887	-1.22067	0.379296	12	12	12	22.2	22.2	22.2	51.556	0	19.29	6022700000	3451100000	2571600000	1	9	6	7	P08621	U1 small nuclear ribonucleoprotein 70 kDa
P13073	COX4I1	-0.0230233	0.102678	0.0398276	0.0888842	11	11	11	51.5	51.5	51.5	19.576	0	42.699	15501000000	5906200000	9594600000	2	9	9	9	P13073	Cytochrome c oxidase subunit 4 isoform 1, mitochondrial
Q9Y5A9	YTHDF2	-0.826658	0.0880807	-0.369289	0.646818	11	11	8	26.6	26.6	22.3	62.333	0	121.34	1194900000	777500000	417430000	6	6	6	6	Q9Y5A9	YTH domain-containing family protein 2
Q9NZ01	TECR	0.667457	0.517576	0.592517	0.105982	17	17	17	39	39	39	36.034	0	68.338	21679000000	8263800000	13415000000	13	15	14	14	Q9NZ01	Very-long-chain enoyl-CoA reductase
P10153	RNASE2				#DIV/0!	3	3	3	19.9	19.9	19.9	18.354	0	10.372	977690000	86646000	891050000	2	3	2	2	P10153	Non-secretory ribonuclease
P15153	RAC2	0.598119	0.727675	0.662897	0.0916099	11	10	5	66.7	60.9	34.4	21.429	0	142.27	49302000000	18386000000	30916000000	5	9	9	10	P15153	Ras-related C3 botulinum toxin substrate 2
O95239	KIF4A	0.144528	0.34895	0.246739	0.144548	23	23	23	21.5	21.5	21.5	139.88	0	171.62	1272600000	658940000	613670000	16	7	10	8	O95239;Q2VIQ3	Chromosome-associated kinesin KIF4A
O14735	CDIPT	0.449092	0.354474	0.401783	0.066905	4	4	4	22.1	22.1	22.1	23.539	0	21.443	2099500000	518530000	1581000000	3	4	2	2	O14735	CDP-diacylglycerol--inositol 3-phosphatidyltransferase
Q8TCT8	SPPL2A	0.578412	0.565114	0.571763	0.00940311	3	3	3	6.5	6.5	6.5	58.143	0	4.2201	348660000	112040000	236610000	2	3	1	1	Q8TCT8	Signal peptide peptidase-like 2A
P14174	MIF	0.41446	0.419071	0.416766	0.00326047	9	9	9	46.1	46.1	46.1	12.476	0	49.14	74833000000	21798000000	53035000000	6	8	8	9	P14174	Macrophage migration inhibitory factor
P60228	EIF3E	0.347757	0.389277	0.368517	0.0293591	22	22	22	61.1	61.1	61.1	52.22	0	323.31	14443000000	5876200000	8567200000	10	12	21	7	P60228	Eukaryotic translation initiation factor 3 subunit E
O75223	GGCT	0.635137	0.941476	0.788307	0.216614	9	9	9	62.2	62.2	62.2	21.007	0	86.114	6583000000	2262200000	4320900000	3	9	6	7	O75223	Gamma-glutamylcyclotransferase
Q9Y6B6	SAR1B	1.35928	1.22514	1.29221	0.0948513	12	7	7	67.7	52.5	52.5	22.41	0	80.837	956370000	311620000	644750000	3	11	5	12	Q9Y6B6	GTP-binding protein SAR1b
P51148	RAB5C	0.725027	0.809425	0.767226	0.0596784	12	12	9	75	75	60.2	23.482	0	323.31	35117000000	10369000000	24748000000	8	12	10	11	P51148	Ras-related protein Rab-5C
Q5BJH7	YIF1B	1.24594	0.760789	1.00336	0.343054	5	5	5	33.8	33.8	33.8	34.435	0	49.073	840860000	175740000	665120000	1	4	2	2	Q5BJH7	Protein YIF1B
Q7Z406	MYH14	0.958825	1.00432	0.98157	0.0321698	12	1	1	5.5	0.6	0.6	227.87	0.00017229	2.8302	7784400000	1888100000	5896300000	12	8	11	11	Q7Z406	Myosin-14
Q96PE7	MCEE				#DIV/0!	3	3	3	30.1	30.1	30.1	18.749	0	75.023	159410000	48709000	110710000	2	1	1	0	Q96PE7	Methylmalonyl-CoA epimerase, mitochondrial
Q9H974	QTRTD1	0.440462	0.547297	0.49388	0.0755438	5	5	5	16.4	16.4	16.4	46.712	0	35.109	732900000	307030000	425860000	2	2	4	2	Q9H974	Queuine tRNA-ribosyltransferase subunit QTRTD1
Q99590	SCAF11	2.29352	2.30972	2.30162	0.0114551	37	37	37	28.7	28.7	28.7	164.65	0	323.31	5111600000	1150100000	3961500000	28	27	25	18	Q99590	Protein SCAF11
P47756	CAPZB	0.506163	0.37947	0.442817	0.0895855	18	18	18	64.3	64.3	64.3	31.35	0	267.57	29647000000	9592900000	20054000000	6	14	17	8	P47756	F-actin-capping protein subunit beta
P19440;A6NGU5;P36268	GGT1;GGT3P;GGT2	3.47608	3.73059	3.60334	0.179966	9	9	9	20.7	20.7	20.7	61.409	0	138.43	1512700000	184460000	1328300000	4	8	5	3	P19440;A6NGU5;P36268;Q14390;B5MD39	Gamma-glutamyltranspeptidase 1;Gamma-glutamyltranspeptidase 1 heavy chain;Gamma-glutamyltranspeptidase 1 light chain;Putative gamma-glutamyltranspeptidase 3;Putative gamma-glutamyltranspeptidase 3 heavy chain;Putative gamma-glutamyltranspeptidase 3 light chain;Inactive gamma-glutamyltranspeptidase 2
Q9Y2V2	CARHSP1	0.271457	0.50115	0.386304	0.162417	4	4	4	59.2	59.2	59.2	15.892	0	180.3	5681300000	2246200000	3435100000	3	3	3	3	Q9Y2V2	Calcium-regulated heat stable protein 1
Q01813	PFKP	2.11384	1.94993	2.03188	0.115902	37	37	33	54.8	54.8	49.1	85.595	0	323.31	35421000000	8511300000	26909000000	21	31	25	19	Q01813	ATP-dependent 6-phosphofructokinase, platelet type
Q9Y265	RUVBL1	-0.152744	-0.209429	-0.181087	0.0400823	22	22	22	62.5	62.5	62.5	50.227	0	323.31	32682000000	14191000000	18491000000	16	16	17	8	Q9Y265	RuvB-like 1
Q5JSL3	DOCK11	0.337493	0.176408	0.256951	0.113904	68	68	65	38.6	38.6	37.4	237.67	0	275.15	4829900000	1998300000	2831600000	24	44	38	32	Q5JSL3	Dedicator of cytokinesis protein 11
Q9NZI8	IGF2BP1	5.3634	3.33568	4.34954	1.43381	11	10	10	25.1	22.9	22.9	63.48	0	224.36	2296000000	121240000	2174700000	6	10	8	6	Q9NZI8	Insulin-like growth factor 2 mRNA-binding protein 1
Q9NPL8	TIMMDC1	0.244248	0.710927	0.477587	0.329992	9	9	9	37.2	37.2	37.2	32.177	0	122.32	1836800000	561340000	1275400000	3	9	5	5	Q9NPL8	Complex I assembly factor TIMMDC1, mitochondrial
O00116	AGPS	2.03774	1.91164	1.97469	0.0891662	32	32	32	63.4	63.4	63.4	72.911	0	323.31	26934000000	6144800000	20789000000	23	28	21	18	O00116	Alkyldihydroxyacetonephosphate synthase, peroxisomal
P20020	ATP2B1		0.311601	0.311601	#DIV/0!	21	5	5	18.9	6.1	6.1	134.68	0	13.338	113840000	35430000	78411000	13	18	13	16	P20020	Plasma membrane calcium-transporting ATPase 1
Q96EL2	MRPS24	-0.210092	-0.213717	-0.211905	0.00256326	7	7	7	52.1	52.1	52.1	19.015	0	45.78	2140700000	1122700000	1018000000	2	4	6	5	Q96EL2	28S ribosomal protein S24, mitochondrial
P10599	TXN	-0.0920144	-0.108868	-0.100441	0.0119173	12	12	12	88.6	88.6	88.6	11.737	0	230.49	32338000000	14426000000	17912000000	9	10	10	12	P10599	Thioredoxin
Q9H0R4	HDHD2	0.287839	0.38694	0.33739	0.070075	7	7	7	40.9	40.9	40.9	28.536	0	135.12	4948300000	2043000000	2905300000	6	6	7	6	Q9H0R4	Haloacid dehalogenase-like hydrolase domain-containing protein 2
Q5T013	HYI	4.45155		4.45155	#DIV/0!	9	9	9	50.5	50.5	50.5	30.405	0	197.48	1492900000	399720000	1093100000	3	8	5	2	Q5T013	Putative hydroxypyruvate isomerase
Q96BQ5	CCDC127		-0.736702	-0.736702	#DIV/0!	4	4	4	13.1	13.1	13.1	30.834	0	3.7773	199030000	73556000	125470000	2	2	2	2	Q96BQ5;Q63HQ0	Coiled-coil domain-containing protein 127
P62273	RPS29	0.0285954	-0.0744383	-0.0229214	0.0728558	5	5	5	66.1	66.1	66.1	6.6767	0	11.233	6130100000	3475100000	2655000000	0	2	4	4	P62273	40S ribosomal protein S29
Q3KQU3	MAP7D1	0.532802		0.532802	#DIV/0!	8	8	8	12.7	12.7	12.7	92.819	0	18.116	147730000	51057000	96678000	5	3	2	0	Q3KQU3	MAP7 domain-containing protein 1
P50502;Q8NFI4;Q8IZP2	ST13;ST13P5;ST13P4	-0.167521	0.0343642	-0.0665785	0.142754	12	12	12	32.8	32.8	32.8	41.331	0	101.35	16555000000	7269100000	9286000000	4	8	9	5	P50502;Q8NFI4;Q8IZP2	Hsc70-interacting protein;Putative protein FAM10A5;Putative protein FAM10A4
Q676U5	ATG16L1				#DIV/0!	4	4	4	12.4	12.4	12.4	68.264	0	165.16	280960000	95686000	185270000	3	2	1	0	Q676U5	Autophagy-related protein 16-1
Q96G03	PGM2	0.540699	0.42936	0.485029	0.0787286	37	37	37	57.8	57.8	57.8	68.283	0	323.31	26714000000	7671800000	19042000000	20	32	17	18	Q96G03	Phosphoglucomutase-2
Q7LGA3	HS2ST1	-0.888818	-0.549015	-0.718917	0.240277	4	4	4	14.6	14.6	14.6	41.881	0	24.537	745670000	328270000	417390000	2	2	3	2	Q7LGA3	Heparan sulfate 2-O-sulfotransferase 1
Q06830	PRDX1	-0.0967976	0.113552	0.00837703	0.14874	23	23	18	79.4	79.4	70.4	22.11	0	274.37	151440000000	60116000000	91327000000	11	21	19	21	Q06830	Peroxiredoxin-1
P25398	RPS12	0.209106	0.121716	0.165411	0.0617941	11	11	11	78	78	78	14.515	0	167.36	45240000000	19840000000	25400000000	7	9	9	9	P25398	40S ribosomal protein S12
O75874	IDH1	-0.511944	-0.31357	-0.412757	0.140272	20	19	19	50.5	48.3	48.3	46.659	0	266.04	20923000000	9933600000	10989000000	6	18	15	8	O75874	Isocitrate dehydrogenase [NADP] cytoplasmic
P84090	ERH	-0.261564	-0.417054	-0.339309	0.109948	9	9	9	62.5	62.5	62.5	12.259	0	124	14148000000	8209800000	5938200000	2	9	8	6	P84090	Enhancer of rudimentary homolog
O14744	PRMT5	0.0411217	-0.0618058	-0.010342	0.0727807	29	29	29	55.9	55.9	55.9	72.683	0	323.31	22127000000	8674000000	13453000000	16	24	19	18	O14744	Protein arginine N-methyltransferase 5;Protein arginine N-methyltransferase 5, N-terminally processed
O75746	SLC25A12	1.13893	1.14592	1.14243	0.00494268	26	26	20	50.7	50.7	42.5	74.761	0	198.34	8520200000	2664000000	5856300000	16	25	13	11	O75746	Calcium-binding mitochondrial carrier protein Aralar1
P30101	PDIA3	0.433137	0.320751	0.376944	0.0794689	45	44	44	74.9	74.9	74.9	56.782	0	323.31	169240000000	49391000000	119850000000	26	39	27	29	P30101	Protein disulfide-isomerase A3
O43303	CCP110				#DIV/0!	2	2	2	2.8	2.8	2.8	113.42	0	4.1483	34629000	14239000	20390000	2	0	0	0	O43303	Centriolar coiled-coil protein of 110 kDa
O95671	ASMTL	-0.433383	-0.593512	-0.513448	0.113228	18	18	18	45.4	45.4	45.4	68.856	0	323.31	5362000000	3205200000	2156700000	10	9	11	15	O95671	N-acetylserotonin O-methyltransferase-like protein
Q6RW13	AGTRAP	1.788	1.48704	1.63752	0.212811	4	4	4	35.2	35.2	35.2	17.419	0	74.358	2037900000	791030000	1246900000	3	3	3	3	Q6RW13	Type-1 angiotensin II receptor-associated protein
Q96AQ6	PBXIP1				#DIV/0!	11	11	11	18.3	18.3	18.3	80.642	0	44.07	556570000	64855000	491720000	5	10	1	0	Q96AQ6	Pre-B-cell leukemia transcription factor-interacting protein 1
Q8IXT5	RBM12B	-1.69387	-1.72199	-1.70793	0.0198838	27	27	27	37.4	37.4	37.4	118.1	0	60.726	2045500000	1312000000	733490000	15	4	19	11	Q8IXT5	RNA-binding protein 12B
O00422	SAP18	-0.197672	-0.289249	-0.24346	0.0647547	8	8	8	52.9	52.9	52.9	17.561	0	44.381	3060000000	1767800000	1292200000	3	5	5	6	O00422	Histone deacetylase complex subunit SAP18
Q9NX62	IMPAD1	0.65223	0.586764	0.619497	0.0462915	7	7	7	27.9	27.9	27.9	38.681	0	157.64	1542500000	502630000	1039900000	2	5	4	3	Q9NX62	Inositol monophosphatase 3
P10606	COX5B	-0.167191	-0.157448	-0.162319	0.00688934	8	8	8	62	62	62	13.696	0	56.874	5763000000	2628600000	3134400000	3	5	8	6	P10606	Cytochrome c oxidase subunit 5B, mitochondrial
Q68DH5	LMBRD2	0.509175		0.509175	#DIV/0!	4	4	4	7.5	7.5	7.5	81.171	0	14.938	97796000	14178000	83617000	2	3	1	0	Q68DH5	LMBR1 domain-containing protein 2
O60762	DPM1	0.764133	0.792684	0.778409	0.0201886	14	14	14	59.2	59.2	59.2	29.634	0	270.53	9938000000	3001400000	6936600000	8	11	10	10	O60762	Dolichol-phosphate mannosyltransferase subunit 1
Q9UH99	SUN2	1.29677		1.29677	#DIV/0!	12	12	12	27.1	27.1	27.1	80.31	0	154.43	1086600000	261810000	824820000	8	10	4	1	Q9UH99	SUN domain-containing protein 2
P10515	DLAT	-1.13981	-1.12426	-1.13204	0.0109955	20	20	20	44	44	44	68.996	0	323.31	28054000000	15124000000	12930000000	15	17	15	15	P10515	Dihydrolipoyllysine-residue acetyltransferase component of pyruvate dehydrogenase complex, mitochondrial
P46940	IQGAP1	1.07573	0.905189	0.990457	0.120591	130	130	123	76.2	76.2	74.6	189.25	0	323.31	295850000000	95842000000	200010000000	106	115	109	107	P46940	Ras GTPase-activating-like protein IQGAP1
Q9UKK9	NUDT5	0.822185	0.657783	0.739984	0.11625	16	16	16	74.4	74.4	74.4	24.327	0	204.23	13106000000	4648700000	8456900000	4	15	9	9	Q9UKK9	ADP-sugar pyrophosphatase
P51809	VAMP7	1.23911	0.869949	1.05453	0.261036	13	13	13	61.8	61.8	61.8	24.935	0	241.84	9724200000	5245500000	4478700000	8	10	10	10	P51809	Vesicle-associated membrane protein 7
A1L0T0	ILVBL	0.654734	0.1375	0.396117	0.36574	18	18	18	41.6	41.6	41.6	67.867	0	323.31	5480200000	1804200000	3676000000	10	16	11	10	A1L0T0	Acetolactate synthase-like protein
O75663	TIPRL	1.00216	0.693886	0.848025	0.217983	16	16	16	71.7	71.7	71.7	31.444	0	180.72	10313000000	3379100000	6933700000	7	12	12	8	O75663	TIP41-like protein
P08758	ANXA5	0.829454	0.805114	0.817284	0.017211	24	24	24	76.2	76.2	76.2	35.936	0	323.31	51847000000	14295000000	37551000000	17	22	22	17	P08758	Annexin A5
P62280	RPS11	0.166821	0.203232	0.185026	0.0257465	18	18	18	67.7	67.7	67.7	18.431	0	93.672	24553000000	11739000000	12814000000	3	8	13	15	P62280	40S ribosomal protein S11
P20700	LMNB1	0.25209	0.0439867	0.148038	0.147151	49	47	45	71.5	70.1	67.4	66.408	0	323.31	55310000000	18834000000	36476000000	26	43	37	34	P20700	Lamin-B1
Q8WXB1	METTL21A	1.08251	0.128884	0.605698	0.674315	4	4	4	26.1	26.1	26.1	24.6	0	10.293	290350000	60928000	229420000	1	3	2	2	Q8WXB1	Protein N-lysine methyltransferase METTL21A
P05556	ITGB1	0.67463	0.737525	0.706077	0.0444735	28	28	28	40.4	40.4	40.4	88.414	0	196.84	20233000000	6493200000	13740000000	23	21	15	19	P05556	Integrin beta-1
Q7L576	CYFIP1	0.523305	0.489238	0.506271	0.024089	57	57	35	48.4	48.4	30.1	145.18	0	323.31	30743000000	12467000000	18276000000	43	40	44	49	Q7L576	Cytoplasmic FMR1-interacting protein 1
Q96B49	TOMM6	1.01566		1.01566	#DIV/0!	2	2	2	56.8	56.8	56.8	8.0019	0	92.179	1959200000	451720000	1507500000	2	2	2	1	Q96B49	Mitochondrial import receptor subunit TOM6 homolog
Q96BZ4	PLD4	2.98904	3.2771	3.13307	0.203689	8	8	8	20	20	20	55.626	0	57.179	2643800000	292800000	2351000000	5	7	4	4	Q96BZ4	Phospholipase D4
P63000	RAC1	0.515041	0.977909	0.746475	0.327297	11	5	3	56.2	24	15.1	21.45	0	17.285	8959600000	3258000000	5701600000	5	9	9	10	P63000	Ras-related C3 botulinum toxin substrate 1
Q00610	CLTC	0.538024	0.457609	0.497817	0.056862	118	118	93	74.6	74.6	62.6	191.61	0	323.31	616530000000	220080000000	396440000000	105	106	102	110	Q00610	Clathrin heavy chain 1
Q96B97	SH3KBP1	1.39549	0.687314	1.0414	0.500756	17	17	17	34.3	34.3	34.3	73.125	0	222.32	1383600000	320030000	1063500000	13	8	5	6	Q96B97	SH3 domain-containing kinase-binding protein 1
Q5JPE7;P69849	NOMO2;NOMO3	0.257243	0.21705	0.237146	0.0284207	55	55	4	56.7	56.7	4.7	139.44	0	323.31	51472000000	20037000000	31435000000	48	50	43	44	Q5JPE7;P69849	Nodal modulator 2;Nodal modulator 3
P16455	MGMT	1.18275	0.834168	1.00846	0.246485	4	4	4	30.4	30.4	30.4	21.646	0	31.518	810340000	235420000	574920000	1	4	2	4	P16455	Methylated-DNA--protein-cysteine methyltransferase
Q8TDW0	LRRC8C	1.13794	1.58099	1.35947	0.313284	22	22	20	32.9	32.9	30.3	92.448	0	312.09	2915500000	480040000	2435500000	12	18	5	2	Q8TDW0;Q6NSJ5;Q6P9F7	Volume-regulated anion channel subunit LRRC8C
P26885	FKBP2	-1.02301	-0.98509	-1.00405	0.0268135	14	14	14	74.6	74.6	74.6	15.649	0	168.5	4673100000	2059200000	2613900000	6	11	8	11	P26885	Peptidyl-prolyl cis-trans isomerase FKBP2
Q9BY44	EIF2A	1.29776	1.24948	1.27362	0.0341391	22	22	22	54.5	54.5	54.5	64.989	0	323.31	7200800000	2428300000	4772500000	2	13	18	11	Q9BY44	Eukaryotic translation initiation factor 2A;Eukaryotic translation initiation factor 2A, N-terminally processed
Q4VC31	CCDC58	1.34912	1.36214	1.35563	0.00920653	8	8	8	54.2	54.2	54.2	16.62	0	90.256	5656400000	3363700000	2292700000	2	3	7	4	Q4VC31	Coiled-coil domain-containing protein 58
P61224;A6NIZ1	RAP1B	0.737744	0.687558	0.712651	0.0354869	15	15	5	67.4	67.4	29.9	20.825	0	294.51	37920000000	11757000000	26163000000	8	13	13	12	P61224;A6NIZ1	Ras-related protein Rap-1b;Ras-related protein Rap-1b-like protein
Q08380	LGALS3BP	3.31347	2.10052	2.707	0.857685	10	10	10	21.4	21.4	21.4	65.33	0	206.49	1701300000	214640000	1486700000	4	7	4	3	Q08380	Galectin-3-binding protein
Q9UBW7	ZMYM2	-0.00487482	-0.0275162	-0.0161955	0.0160099	20	20	20	21.2	21.2	21.2	154.91	0	99.168	1117900000	669180000	448760000	8	5	13	9	Q9UBW7	Zinc finger MYM-type protein 2
O43169	CYB5B	0.935173	1.15017	1.04267	0.152026	9	9	9	68.5	68.5	68.5	16.332	0	323.31	25028000000	5993700000	19034000000	5	9	4	6	O43169	Cytochrome b5 type B
P17931	LGALS3	-3.9426	-3.86133	-3.90197	0.0574666	8	8	8	32.4	32.4	32.4	26.152	0	75.855	4748400000	4087200000	661240000	3	3	3	4	P17931	Galectin-3
P29350	PTPN6	1.20382	1.19155	1.19768	0.0086762	28	28	28	56.1	56.1	56.1	67.56	0	166.08	13065000000	3785800000	9279300000	15	23	15	14	P29350	Tyrosine-protein phosphatase non-receptor type 6
Q7L014	DDX46	0.692238	0.664968	0.678603	0.0192828	61	61	61	56.5	56.5	56.5	117.36	0	323.31	29594000000	11254000000	18340000000	44	52	34	50	Q7L014	Probable ATP-dependent RNA helicase DDX46
Q92882	OSTF1	1.48292	1.51883	1.50087	0.0253922	9	9	9	50.9	50.9	50.9	23.787	0	86.061	3833200000	1151000000	2682200000	3	6	5	5	Q92882	Osteoclast-stimulating factor 1
Q9BXW9	FANCD2	2.91644	1.98675	2.45159	0.65739	43	43	43	36.3	36.3	36.3	164.13	0	323.31	5012600000	1212400000	3800200000	26	33	28	24	Q9BXW9	Fanconi anemia group D2 protein
Q03518	TAP1	0.780484	0.607751	0.694117	0.122141	11	11	11	28.2	28.2	28.2	87.217	0	308.29	1764400000	472710000	1291700000	7	9	10	4	Q03518	Antigen peptide transporter 1
P55327	TPD52	0.0770925	0.157186	0.117139	0.0566347	11	11	11	64.3	64.3	64.3	24.327	0	323.31	3679000000	1125500000	2553500000	3	10	5	9	P55327	Tumor protein D52
P57088	TMEM33	1.22756	1.14258	1.18507	0.0600899	10	10	10	34	34	34	27.978	0	58.178	9907300000	2808800000	7098600000	5	8	8	8	P57088	Transmembrane protein 33
Q9Y3Q3	TMED3	0.848376	1.02425	0.936311	0.124362	7	7	7	53.9	53.9	53.9	24.777	0	134.17	1957300000	563230000	1394100000	3	6	2	4	Q9Y3Q3	Transmembrane emp24 domain-containing protein 3
Q10713	PMPCA	-0.113555	-0.735254	-0.424404	0.439608	15	15	15	34.9	34.9	34.9	58.252	0	102.56	4418200000	2091200000	2327000000	6	7	9	8	Q10713	Mitochondrial-processing peptidase subunit alpha
P49591	SARS	-1.57789	-1.60297	-1.59043	0.0177342	22	22	22	46.9	46.9	46.9	58.777	0	323.31	17437000000	10286000000	7150700000	9	11	13	18	P49591	Serine--tRNA ligase, cytoplasmic
Q9UNF0	PACSIN2	-0.155304	-0.149661	-0.152483	0.0039902	11	11	11	26.1	26.1	26.1	55.738	0	97.086	2038500000	838920000	1199600000	1	7	1	6	Q9UNF0	Protein kinase C and casein kinase substrate in neurons protein 2
O60749	SNX2	0.467104	0.349997	0.40855	0.0828072	21	21	19	49.5	49.5	45.5	58.47	0	275.09	7969100000	3758200000	4210900000	8	16	9	7	O60749	Sorting nexin-2
Q9BU23	LMF2	1.20095	0.871805	1.03638	0.232741	4	4	4	7.6	7.6	7.6	79.697	0	6.3756	185760000	73933000	111830000	2	2	3	2	Q9BU23	Lipase maturation factor 2
O60830	TIMM17B	1.03665	1.3371	1.18688	0.21245	6	6	6	47.7	47.7	47.7	18.273	0	167.86	2330500000	671100000	1659500000	5	6	5	2	O60830	Mitochondrial import inner membrane translocase subunit Tim17-B
P46821	MAP1B	3.07839	2.96038	3.01939	0.0834457	74	74	72	46.9	46.9	45.9	270.63	0	323.31	6367000000	585020000	5782000000	43	45	45	58	P46821	Microtubule-associated protein 1B;MAP1B heavy chain;MAP1 light chain LC1
Q9H4A6	GOLPH3	0.905171	0.839406	0.872289	0.0465029	9	9	7	34.9	34.9	25.2	33.81	0	59.058	1476000000	337200000	1138800000	5	7	4	3	Q9H4A6	Golgi phosphoprotein 3
O75477	ERLIN1	1.6844	0.845737	1.26507	0.593024	11	11	8	39	39	30.1	38.925	0	63.834	4733800000	1295300000	3438400000	4	9	7	2	O75477	Erlin-1
Q96K37	SLC35E1	0.581712	0.717407	0.649559	0.0959509	4	4	4	16.8	16.8	16.8	44.772	0	123.91	570270000	170840000	399430000	2	3	3	1	Q96K37	Solute carrier family 35 member E1
P26447	S100A4	-0.768933	-0.608142	-0.688538	0.113696	13	13	13	64.4	64.4	64.4	11.728	0	32.861	46358000000	22875000000	23483000000	2	11	9	12	P26447	Protein S100-A4
P54278	PMS2	0.727679		0.727679	#DIV/0!	3	3	3	4.6	4.6	4.6	95.796	0	12.618	100940000	22084000	78855000	2	3	2	1	P54278	Mismatch repair endonuclease PMS2
P62136	PPP1CA	-0.577928	-0.740312	-0.65912	0.114823	20	20	4	65.8	65.8	19.1	37.512	0	313.46	23531000000	13922000000	9608400000	12	10	18	12	P62136	Serine/threonine-protein phosphatase PP1-alpha catalytic subunit
P02654	APOC1		-4.39929	-4.39929	#DIV/0!	5	5	5	37.3	37.3	37.3	9.3318	0	7.4975	164700000	120530000	44178000	0	4	0	4	P02654	Apolipoprotein C-I;Truncated apolipoprotein C-I
P55209	NAP1L1	1.73635	1.86916	1.80275	0.0939109	12	12	11	38.1	38.1	35.5	45.374	0	323.31	15819000000	3984200000	11835000000	9	12	10	9	P55209	Nucleosome assembly protein 1-like 1
Q9UBQ5	EIF3K	0.876141	1.09194	0.984041	0.152593	10	10	10	63.3	63.3	63.3	25.059	0	115.25	7683200000	2656100000	5027100000	3	7	6	9	Q9UBQ5	Eukaryotic translation initiation factor 3 subunit K
P49748	ACADVL	-0.314849	-0.425071	-0.36996	0.0779387	30	30	30	57.7	57.7	57.7	70.389	0	323.31	18276000000	10004000000	8271700000	24	19	18	20	P49748	Very long-chain specific acyl-CoA dehydrogenase, mitochondrial
Q13404	UBE2V1	0.333846	0.242752	0.288299	0.0644132	14	14	7	79.6	79.6	40.8	16.495	0	99.39	12669000000	4065000000	8604100000	4	11	9	9	Q13404	Ubiquitin-conjugating enzyme E2 variant 1
P05091	ALDH2	4.0543	5.31633	4.68531	0.89239	15	14	14	39.8	38.5	38.5	56.381	0	154.7	4366200000	635510000	3730700000	10	11	10	4	P05091	Aldehyde dehydrogenase, mitochondrial
Q14165	MLEC	0.911871	0.869839	0.890855	0.0297211	15	15	15	51	51	51	32.233	0	323.31	7289800000	1789600000	5500300000	4	13	8	4	Q14165	Malectin
Q5T0F9	CC2D1B	0.815605	0.641189	0.728397	0.123331	12	12	12	20.3	20.3	20.3	94.223	0	42.35	716840000	276420000	440420000	9	6	7	4	Q5T0F9	Coiled-coil and C2 domain-containing protein 1B
O75251	NDUFS7	-0.255138	-0.0371485	-0.146143	0.154142	6	6	6	29.6	29.6	29.6	23.563	0	63.017	2836300000	1208500000	1627900000	2	6	4	5	O75251	NADH dehydrogenase [ubiquinone] iron-sulfur protein 7, mitochondrial
P17655	CAPN2	1.00367	0.822854	0.913261	0.127856	27	27	27	46.7	46.7	46.7	79.994	0	323.31	4437300000	1292700000	3144500000	12	24	10	11	P17655	Calpain-2 catalytic subunit
A0FGR8	ESYT2	2.43884	2.44091	2.43987	0.00146371	28	28	28	40.6	40.6	40.6	102.36	0	323.31	8094800000	1507200000	6587600000	18	24	18	16	A0FGR8	Extended synaptotagmin-2
Q96QG7	MTMR9		-0.157172	-0.157172	#DIV/0!	6	6	6	14.9	14.9	14.9	63.461	0	14.082	350590000	174800000	175790000	2	1	1	4	Q96QG7	Myotubularin-related protein 9
P18031	PTPN1	-0.769396	-0.879538	-0.824467	0.0778822	10	10	10	33.1	33.1	33.1	49.966	0	227.1	1873700000	969960000	903780000	2	7	7	4	P18031	Tyrosine-protein phosphatase non-receptor type 1
Q16773	CCBL1	-1.90127		-1.90127	#DIV/0!	2	2	2	10.4	10.4	10.4	47.875	0	8.9961	118770000	77241000	41533000	2	0	2	1	Q16773	Kynurenine--oxoglutarate transaminase 1
Q96GE9	TMEM261	-0.887168		-0.887168	#DIV/0!	3	3	3	49.1	49.1	49.1	12.257	0	68.445	279650000	120500000	159140000	3	2	2	1	Q96GE9	Transmembrane protein 261
P61513	RPL37A	0.019145	0.259248	0.139196	0.169778	8	8	8	67.4	67.4	67.4	10.275	0	47.127	7046700000	3745100000	3301600000	2	5	7	7	P61513;A6NKH3	60S ribosomal protein L37a
P46459	NSF	1.11574	1.01696	1.06635	0.069848	43	43	43	58.7	58.7	58.7	82.593	0	323.31	19531000000	5482800000	14048000000	20	39	16	17	P46459	Vesicle-fusing ATPase
P46779	RPL28	-0.0566678	0.138638	0.040985	0.138102	12	12	12	58.4	58.4	58.4	15.747	0	36.02	24131000000	12626000000	11505000000	6	6	11	11	P46779	60S ribosomal protein L28
Q14554	PDIA5	1.07139	0.860636	0.966015	0.149026	16	16	16	45.3	45.3	45.3	59.594	0	323.31	4614300000	1025800000	3588500000	4	13	10	8	Q14554	Protein disulfide-isomerase A5
P50897	PPT1	3.15332	3.41147	3.28239	0.18254	12	12	12	41.2	41.2	41.2	34.193	0	204.7	25137000000	3914000000	21223000000	5	8	11	9	P50897	Palmitoyl-protein thioesterase 1
P56134	ATP5J2	0.673198	0.947118	0.810158	0.193691	5	5	5	52.1	52.1	52.1	10.918	0	16.178	19638000000	7082400000	12556000000	3	5	4	4	P56134	ATP synthase subunit f, mitochondrial
P30048	PRDX3	1.39061	1.67597	1.53329	0.20178	14	14	14	55.9	55.9	55.9	27.692	0	323.31	79159000000	17406000000	61753000000	8	14	11	13	P30048	Thioredoxin-dependent peroxide reductase, mitochondrial
Q9H773	DCTPP1	0.0129179	0.268533	0.140726	0.180747	8	8	8	51.8	51.8	51.8	18.681	0	50.071	2746600000	1225000000	1521600000	3	5	6	6	Q9H773	dCTP pyrophosphatase 1
Q13148	TARDBP	-0.735505	-0.992401	-0.863953	0.181653	13	13	13	36	36	36	44.739	0	236.04	11493000000	6309500000	5183500000	4	7	11	9	Q13148	TAR DNA-binding protein 43
P48556	PSMD8	0.446715	0.422079	0.434397	0.0174203	11	11	11	36.3	36.3	36.3	39.611	0	188.87	9898200000	3413200000	6485000000	5	9	6	4	P48556	26S proteasome non-ATPase regulatory subunit 8
O43237	DYNC1LI2	-0.293524	-0.349824	-0.321674	0.0398101	10	8	8	27.2	24.6	24.6	54.099	0	70.287	990210000	398770000	591440000	2	10	7	6	O43237	Cytoplasmic dynein 1 light intermediate chain 2
P26038	MSN	0.155323	0.257985	0.206654	0.072593	60	60	46	77.3	77.3	59.3	67.819	0	323.31	269350000000	94340000000	175010000000	39	51	54	37	P26038	Moesin
Q9P2B2	PTGFRN	0.177825		0.177825	#DIV/0!	21	21	21	26.2	26.2	26.2	98.555	0	49.945	1396200000	358540000	1037700000	14	17	4	2	Q9P2B2	Prostaglandin F2 receptor negative regulator
Q8IZQ5	SELH	-0.983558	-0.925872	-0.954715	0.0407902	3	3	3	36.9	36.9	36.9	13.453	0	28.017	367070000	205690000	161380000	1	3	2	2	Q8IZQ5	Selenoprotein H
O15085	ARHGEF11	0.369659	0.179723	0.274691	0.134305	13	13	13	10.9	10.9	10.9	167.7	0	45.562	307920000	132080000	175850000	7	7	6	3	O15085	Rho guanine nucleotide exchange factor 11
O60645	EXOC3	-0.213845	-0.22052	-0.217182	0.00471994	14	14	14	25.7	25.7	25.7	86.844	0	155.82	1054100000	504230000	549850000	6	10	3	7	O60645	Exocyst complex component 3
P53396	ACLY	0.42548	0.53825	0.481865	0.0797404	75	75	75	75.7	75.7	75.7	120.84	0	323.31	198040000000	73851000000	124190000000	65	66	62	66	P53396	ATP-citrate synthase
Q92793	CREBBP	-1.06956	0.805909	-0.131825	1.32616	32	17	17	15	9.2	9.2	265.35	0	80.796	444690000	255910000	188780000	25	20	13	7	Q92793	CREB-binding protein
Q14789	GOLGB1	1.25886	1.32734	1.2931	0.0484227	179	179	178	63.4	63.4	63.2	376.01	0	323.31	14743000000	4561800000	10181000000	122	135	89	115	Q14789;REV__Q8N884	Golgin subfamily B member 1
P52657	GTF2A2	-1.05059	-0.708987	-0.879789	0.24155	3	3	2	21.1	21.1	14.7	12.457	0.00085005	2.5397	1315500000	831660000	483880000	0	2	3	3	P52657	Transcription initiation factor IIA subunit 2
P08237	PFKM	2.05442	2.02783	2.04113	0.018802	15	12	12	24.1	20.6	20.6	85.182	0	204.97	1399500000	286440000	1113000000	9	11	8	7	P08237	ATP-dependent 6-phosphofructokinase, muscle type
P33316	DUT	1.22085	1.35555	1.2882	0.0952473	13	13	13	53.2	53.2	53.2	26.563	0	323.31	33509000000	12529000000	20980000000	8	11	9	12	P33316	Deoxyuridine 5-triphosphate nucleotidohydrolase, mitochondrial
P63092;Q5JWF2	GNAS	0.0525852	0.0681202	0.0603527	0.0109849	10	9	9	27.7	24.9	24.9	45.664	0	43.04	1496200000	628740000	867430000	7	5	8	6	P63092;Q5JWF2	Guanine nucleotide-binding protein G(s) subunit alpha isoforms short;Guanine nucleotide-binding protein G(s) subunit alpha isoforms XLas
Q96ND0	FAM210A	-0.0844007	0.365613	0.140606	0.318208	5	5	5	18.4	18.4	18.4	30.776	0	14.961	1156800000	369200000	787640000	1	3	5	4	Q96ND0	Protein FAM210A
P49411	TUFM	-0.120757	-0.0890379	-0.104897	0.0224288	29	29	29	66.2	66.2	66.2	49.541	0	323.31	45439000000	21845000000	23594000000	14	20	26	13	P49411	Elongation factor Tu, mitochondrial
O43678	NDUFA2	0.078585	0.124234	0.10141	0.0322787	6	6	6	54.5	54.5	54.5	10.921	0	65.476	3651500000	1773500000	1878000000	3	5	4	5	O43678	NADH dehydrogenase [ubiquinone] 1 alpha subcomplex subunit 2
P17174	GOT1	0.469012	0.371229	0.42012	0.069143	17	17	17	51.6	51.6	51.6	46.247	0	299.84	8686800000	3204300000	5482500000	7	11	11	5	P17174	Aspartate aminotransferase, cytoplasmic
P35270	SPR	1.06207	0.961861	1.01197	0.0708585	10	10	10	44.1	44.1	44.1	28.048	0	73.237	2138600000	595200000	1543400000	5	7	8	3	P35270;REV__Q16649	Sepiapterin reductase
Q92643	PIGK	1.83119	1.91216	1.87168	0.0572544	8	8	8	27.3	27.3	27.3	45.251	0	104.69	3899800000	995520000	2904300000	3	6	7	4	Q92643	GPI-anchor transamidase
Q6UWP7	LCLAT1	0.460482	0.0556424	0.258062	0.286265	8	8	8	21.5	21.5	21.5	48.92	0	24.829	1351100000	430290000	920760000	5	7	5	4	Q6UWP7	Lysocardiolipin acyltransferase 1
Q92545	TMEM131	1.80013		1.80013	#DIV/0!	6	6	6	3.7	3.7	3.7	205.14	0	5.5517	82094000	30951000	51143000	2	2	2	2	Q92545	Transmembrane protein 131
Q8N4P3	HDDC3	-1.62666	-1.79042	-1.70854	0.115796	6	6	6	44.1	44.1	44.1	20.329	0	20.958	612650000	389950000	222690000	1	3	4	3	Q8N4P3	Guanosine-3,5-bis(diphosphate) 3-pyrophosphohydrolase MESH1
Q5VTL8	PRPF38B	0.0771477	-0.482783	-0.202818	0.395931	9	9	9	17.9	17.9	17.9	64.467	0	38.258	1693400000	728970000	964420000	6	7	3	2	Q5VTL8	Pre-mRNA-splicing factor 38B
Q9P2N5	RBM27	2.1598	0.62354	1.39167	1.0863	27	25	25	32.8	31.6	31.6	118.72	0	96.351	1372900000	418220000	954700000	15	19	6	3	Q9P2N5	RNA-binding protein 27
Q8N138	ORMDL3				#DIV/0!	5	3	3	38.6	26.8	26.8	17.494	0	9.5027	197350000	97378000	99969000	0	4	3	3	Q8N138	ORM1-like protein 3
Q9UHQ4	BCAP29	0.519463	-0.118879	0.200292	0.451376	7	7	7	24.9	24.9	24.9	28.32	0	11.546	571890000	174010000	397880000	2	6	7	4	Q9UHQ4	B-cell receptor-associated protein 29
Q9Y316	MEMO1	0.783174	0.660512	0.721843	0.0867351	11	11	11	56.9	56.9	56.9	33.733	0	323.31	4267800000	1248400000	3019400000	5	7	9	4	Q9Y316	Protein MEMO1
Q99426	TBCB	0.785981	0.352684	0.569333	0.306387	15	15	15	63.5	63.5	63.5	27.325	0	165.36	8189000000	2796800000	5392300000	8	9	12	10	Q99426	Tubulin-folding cofactor B
Q9Y624	F11R	0.458417	0.33574	0.397078	0.0867457	7	7	7	28.4	28.4	28.4	32.583	0	51.29	5225900000	1509300000	3716500000	2	6	6	5	Q9Y624	Junctional adhesion molecule A
Q5U3C3	TMEM164	-1.17713	0.0355205	-0.570804	0.857473	4	4	4	14.5	14.5	14.5	33.507	0	12.628	6558400000	398000000	6160400000	2	4	2	2	Q5U3C3	Transmembrane protein 164
P33121	ACSL1	1.60899	1.4899	1.54945	0.0842093	21	21	19	34	34	31.2	77.942	0	102.41	6443300000	2082700000	4360700000	8	11	13	13	P33121	Long-chain-fatty-acid--CoA ligase 1
P06400	RB1	1.2644	1.48199	1.37319	0.153859	29	29	29	31.5	31.5	31.5	106.16	0	150.72	4972400000	1700700000	3271800000	19	21	22	23	P06400	Retinoblastoma-associated protein
O60506	SYNCRIP	-0.602958	-0.665283	-0.634121	0.0440704	31	31	25	52.6	52.6	43.7	69.602	0	323.31	125100000000	67171000000	57927000000	24	29	28	27	O60506	Heterogeneous nuclear ribonucleoprotein Q
Q92733	PRCC		-1.2678	-1.2678	#DIV/0!	7	7	7	21	21	21	52.417	0	65.945	654690000	276400000	378290000	4	4	2	5	Q92733	Proline-rich protein PRCC
Q16740	CLPP	0.499546	0.542381	0.520964	0.0302889	12	12	12	47.3	47.3	47.3	30.18	0	162.67	6628800000	2201500000	4427300000	6	9	11	8	Q16740	ATP-dependent Clp protease proteolytic subunit, mitochondrial
O14662	STX16	1.34956		1.34956	#DIV/0!	8	8	8	30.2	30.2	30.2	37.031	0	96.692	980840000	211740000	769100000	5	4	7	1	O14662	Syntaxin-16
P62072	TIMM10	-0.864814	-0.743604	-0.804209	0.0857084	8	8	8	61.1	61.1	61.1	10.333	0	30.407	1037400000	658200000	379220000	0	4	5	6	P62072	Mitochondrial import inner membrane translocase subunit Tim10
Q8WVB6	CHTF18	0.21626	0.0505497	0.133405	0.117175	15	14	14	19.6	18.9	18.9	107.38	0	57.192	476010000	232090000	243930000	11	4	6	9	Q8WVB6	Chromosome transmission fidelity protein 18 homolog
P50995	ANXA11	1.02279	1.26884	1.14582	0.173984	13	13	13	28.7	28.7	28.7	54.389	0	100.48	9931800000	2419400000	7512300000	5	11	6	6	P50995;P27216	Annexin A11
P14618	PKM	-0.026667	-0.0147489	-0.0207079	0.00842737	55	55	53	83.6	83.6	80.4	57.936	0	323.31	515750000000	188660000000	327090000000	45	49	49	43	P14618	Pyruvate kinase PKM
P37268	FDFT1	0.269316	0.0963708	0.182844	0.122291	16	16	16	47.2	47.2	47.2	48.115	0	189.48	3743100000	1085700000	2657400000	8	11	8	5	P37268	Squalene synthase
P57105	SYNJ2BP	0.344921	0.322271	0.333596	0.016016	5	5	5	51.7	51.7	51.7	15.928	0	177.49	989970000	470750000	519220000	3	3	4	2	P57105	Synaptojanin-2-binding protein
Q8WWI1	LMO7				#DIV/0!	3	3	3	2.3	2.3	2.3	192.69	0	3.7853	15099000	6388700	8710600	2	1	0	0	Q8WWI1	LIM domain only protein 7
P49750	YLPM1	0.100091	-0.174839	-0.037374	0.194405	60	60	60	34.5	34.5	34.5	241.64	0	323.31	8273800000	4551500000	3722300000	45	31	38	32	P49750	YLP motif-containing protein 1
O94888	UBXN7	0.515898	0.545173	0.530535	0.0207006	14	14	14	36.2	36.2	36.2	54.862	0	78.559	3132200000	1326000000	1806100000	6	10	9	5	O94888	UBX domain-containing protein 7
P08195	SLC3A2	0.531529	1.22629	0.878907	0.49127	24	24	24	45.2	45.2	45.2	67.993	0	323.31	37059000000	12162000000	24897000000	17	22	13	14	P08195	4F2 cell-surface antigen heavy chain
P61006	RAB8A	-0.427993	-0.215031	-0.321512	0.150587	12	10	7	56.5	51.2	36.7	23.668	0	148.56	14283000000	5717200000	8566200000	4	12	10	11	P61006	Ras-related protein Rab-8A
P28482	MAPK1	-0.460348	-0.381487	-0.420917	0.0557631	17	17	13	59.7	59.7	46.9	41.389	0	226.74	4540400000	2394800000	2145600000	4	3	13	4	P28482	Mitogen-activated protein kinase 1
Q9HAV7	GRPEL1	-0.174613	-0.0735488	-0.124081	0.0714632	13	13	13	61.8	61.8	61.8	24.279	0	168.36	9253900000	3128800000	6125000000	3	13	8	10	Q9HAV7	GrpE protein homolog 1, mitochondrial
Q96SB3	PPP1R9B	0.0241905	-0.175803	-0.0758063	0.141417	15	15	15	25	25	25	89.191	0	74.583	1294900000	578510000	716340000	7	12	7	6	Q96SB3;Q9ULJ8	Neurabin-2
P42025	ACTR1B	0.368415	-0.116226	0.126095	0.342693	11	6	6	39.4	25	25	42.293	0	50.798	755210000	296610000	458600000	5	5	8	4	P42025	Beta-centractin
Q8TD16	BICD2				#DIV/0!	6	6	6	8.1	8.1	8.1	93.532	0	12.809	177560000	55413000	122150000	4	1	1	2	Q8TD16;Q96G01	Protein bicaudal D homolog 2
P60953	CDC42	0.103652	0.224802	0.164227	0.085666	11	10	10	63.9	58.1	58.1	21.258	0	250.27	30839000000	12223000000	18616000000	4	11	6	11	P60953;P17081;Q9H4E5	Cell division control protein 42 homolog
P14635	CCNB1				#DIV/0!	5	5	5	16.2	16.2	16.2	48.337	0	15.153	467530000	151060000	316470000	3	3	3	1	P14635	G2/mitotic-specific cyclin-B1
P43307	SSR1	0.0607188	0.189627	0.125173	0.0911519	6	6	6	29.7	29.7	29.7	32.235	0	149.68	8117800000	2211300000	5906500000	4	6	5	3	P43307	Translocon-associated protein subunit alpha
Q8NFZ0	FBXO18				#DIV/0!	2	2	2	1.6	1.6	1.6	117.68	0.0098576	1.1998	104950000	42394000	62558000	2	0	0	0	Q8NFZ0	F-box only protein 18
P48651	PTDSS1	0.268327	0.0285894	0.148458	0.16952	10	10	10	27.9	27.9	27.9	55.527	0	49.737	6105700000	2580100000	3525600000	7	9	6	5	P48651	Phosphatidylserine synthase 1
P49257	LMAN1	0.5802	0.894781	0.737491	0.222442	16	16	16	44.3	44.3	44.3	57.548	0	323.31	8920300000	2179000000	6741200000	7	13	6	4	P49257	Protein ERGIC-53
P48739	PITPNB	0.379888	0.28431	0.332099	0.0675839	18	18	18	65.7	65.7	65.7	31.54	0	139.93	6340600000	2451500000	3889100000	3	10	12	6	P48739	Phosphatidylinositol transfer protein beta isoform
Q9H3P7	ACBD3	0.206373	0.398881	0.302627	0.136124	16	16	16	46.8	46.8	46.8	60.593	0	221.65	2127400000	837480000	1290000000	6	11	12	3	Q9H3P7	Golgi resident protein GCP60
B7ZAP0	RABGAP1L		0.00254416	0.00254416	#DIV/0!	2	1	1	10.3	4	4	29.038	0.0069908	1.4051	350940000	147150000	203790000	1	2	1	2	B7ZAP0	Rab GTPase-activating protein 1-like, isoform 10
P04075	ALDOA	1.15976	1.10043	1.13009	0.0419526	35	35	29	91.8	91.8	77.7	39.42	0	323.31	287460000000	70125000000	217330000000	24	33	29	25	P04075;P05062	Fructose-bisphosphate aldolase A
Q06323	PSME1	0.409911	0.454946	0.432429	0.0318446	23	23	23	73.9	73.9	73.9	28.723	0	323.31	54553000000	19856000000	34697000000	14	21	18	15	Q06323	Proteasome activator complex subunit 1
Q13310	PABPC4	1.71185	1.68054	1.6962	0.0221395	27	19	17	39.6	25	23.4	70.782	0	323.31	20350000000	5422700000	14927000000	15	25	16	15	Q13310;P0CB38	Polyadenylate-binding protein 4
P63104	YWHAZ	-1.0304	-1.05116	-1.04078	0.0146795	27	24	19	91.4	88.6	73.9	27.745	0	323.31	74233000000	39363000000	34869000000	12	21	23	24	P63104	14-3-3 protein zeta/delta
Q9BSD7	NTPCR	1.02205	1.1719	1.09697	0.10596	8	8	8	48.9	48.9	48.9	20.713	0	32.004	2452000000	922180000	1529800000	2	6	5	6	Q9BSD7	Cancer-related nucleoside-triphosphatase
O43379	WDR62	1.3471		1.3471	#DIV/0!	5	5	5	3.9	3.9	3.9	165.95	0	16.461	75772000	32130000	43642000	5	1	3	1	O43379	WD repeat-containing protein 62
Q6PK18	OGFOD3				#DIV/0!	4	4	4	21.9	21.9	21.9	35.646	0	41.864	440830000	127680000	313150000	3	2	1	1	Q6PK18	2-oxoglutarate and iron-dependent oxygenase domain-containing protein 3
Q13162	PRDX4	-0.0323204	-0.174196	-0.103258	0.100321	22	18	18	64.9	57.9	57.9	30.54	0	323.31	18688000000	7447500000	11240000000	9	15	15	21	Q13162	Peroxiredoxin-4
O95373	IPO7	0.96257	0.987403	0.974986	0.0175596	44	44	43	44.3	44.3	43.4	119.52	0	323.31	52512000000	18395000000	34117000000	38	34	31	33	O95373	Importin-7
Q32MZ4	LRRFIP1	0.779627	0.578711	0.679169	0.142069	33	33	31	44.1	44.1	42.5	89.252	0	323.31	6616800000	2244500000	4372300000	20	21	17	14	Q32MZ4	Leucine-rich repeat flightless-interacting protein 1
P30049	ATP5D	0.800434	-0.126258	0.337088	0.65527	4	4	4	41.1	41.1	41.1	17.49	0	53.427	878610000	456740000	421880000	2	3	4	2	P30049	ATP synthase subunit delta, mitochondrial
Q9BZF1	OSBPL8	-0.0454098	0.177072	0.0658309	0.157318	21	21	19	34.8	34.8	31.8	101.19	0	140.06	4575800000	2230800000	2345100000	12	13	13	14	Q9BZF1	Oxysterol-binding protein-related protein 8
Q14204	DYNC1H1	0.356708	0.275112	0.31591	0.0576971	368	368	368	72.2	72.2	72.2	532.4	0	323.31	478190000000	221930000000	256260000000	307	320	302	331	Q14204	Cytoplasmic dynein 1 heavy chain 1
Q9BVK6	TMED9	0.661566	0.409007	0.535286	0.178586	10	10	9	39.1	39.1	39.1	27.277	0	173.25	14624000000	4454200000	10170000000	4	10	9	9	Q9BVK6	Transmembrane emp24 domain-containing protein 9
Q16854	DGUOK	0.526571	0.538517	0.532544	0.0084471	8	8	8	40.1	40.1	40.1	32.055	0	87.967	1493500000	482000000	1011500000	2	3	6	3	Q16854	Deoxyguanosine kinase, mitochondrial
P51648	ALDH3A2	0.201236		0.201236	#DIV/0!	5	5	5	14	14	14	54.847	0	20.005	363760000	155110000	208650000	2	2	5	1	P51648	Fatty aldehyde dehydrogenase
Q8NF37	LPCAT1	2.06111		2.06111	#DIV/0!	11	11	11	20.8	20.8	20.8	59.151	0	23.687	1964600000	420520000	1544100000	3	10	3	1	Q8NF37	Lysophosphatidylcholine acyltransferase 1
Q9Y689	ARL5A	-0.640743		-0.640743	#DIV/0!	3	3	3	18.4	18.4	18.4	20.728	0	3.1052	112390000	53645000	58742000	2	1	2	0	Q9Y689;Q96KC2	ADP-ribosylation factor-like protein 5A
Q92685	ALG3	2.3584	1.62733	1.99286	0.516945	5	5	5	10.7	10.7	10.7	50.126	0	26.263	1612400000	346600000	1265800000	4	5	4	3	Q92685	Dol-P-Man:Man(5)GlcNAc(2)-PP-Dol alpha-1,3-mannosyltransferase
P60709	ACTB	0.874867		0.874867	#DIV/0!	37	1	1	92.8	4.5	4.5	41.736	0	106.78	7223700000	2122100000	5101600000	24	36	31	29	P60709	Actin, cytoplasmic 1;Actin, cytoplasmic 1, N-terminally processed
P36969	GPX4	1.11695	1.41388	1.26541	0.209961	6	6	6	29.4	29.4	29.4	22.174	0	46.712	2418100000	774110000	1644000000	2	4	2	4	P36969	Phospholipid hydroperoxide glutathione peroxidase, mitochondrial
Q9H3S7	PTPN23	1.33987	0.80375	1.07181	0.379094	53	53	52	39.7	39.7	39.3	178.97	0	292.55	10117000000	4003700000	6113700000	33	42	20	31	Q9H3S7	Tyrosine-protein phosphatase non-receptor type 23
P00338	LDHA	0.51875	0.451717	0.485234	0.0473995	36	36	34	92.5	92.5	84.9	36.688	0	323.31	158170000000	45430000000	112740000000	25	33	28	24	P00338	L-lactate dehydrogenase A chain
Q96ER9	CCDC51	1.26108		1.26108	#DIV/0!	5	5	5	13.6	13.6	13.6	45.811	0	11.253	776090000	188890000	587200000	1	4	2	2	Q96ER9	Coiled-coil domain-containing protein 51
O75164	KDM4A		1.6046	1.6046	#DIV/0!	23	23	23	29.1	29.1	29.1	120.66	0	43.808	1543700000	374620000	1169100000	10	16	0	5	O75164	Lysine-specific demethylase 4A
Q969S9	GFM2	1.39728	1.64811	1.5227	0.177364	13	13	13	18.1	18.1	18.1	86.6	0	53.49	1613400000	752820000	860620000	5	10	5	4	Q969S9	Ribosome-releasing factor 2, mitochondrial
P20339	RAB5A	1.42162	1.61949	1.52056	0.139915	10	7	7	72.1	57.2	57.2	23.658	0	232.69	4047500000	1195500000	2852100000	7	8	9	8	P20339	Ras-related protein Rab-5A
Q96AJ9	VTI1A	1.65429	1.42753	1.54091	0.160344	6	6	5	35	35	31.8	25.217	0	44.493	538020000	132430000	405590000	2	4	3	4	Q96AJ9	Vesicle transport through interaction with t-SNAREs homolog 1A
O95336	PGLS	0.714633	0.582742	0.648688	0.093261	14	14	14	76.7	76.7	76.7	27.547	0	323.31	17918000000	6808100000	11110000000	8	10	13	12	O95336	6-phosphogluconolactonase
Q8WZA9	IRGQ	1.29196	1.62622	1.45909	0.236358	12	12	12	30.5	30.5	30.5	62.717	0	194.73	3345800000	820870000	2524900000	7	11	5	6	Q8WZA9	Immunity-related GTPase family Q protein
P14406	COX7A2	-0.42603	-0.110209	-0.26812	0.223319	4	4	4	56.6	56.6	56.6	9.3959	0	26.851	7333400000	2733900000	4599500000	3	3	3	3	P14406	Cytochrome c oxidase subunit 7A2, mitochondrial
Q9Y2G5	POFUT2	1.19884		1.19884	#DIV/0!	5	5	5	17.9	17.9	17.9	49.975	0	15.393	567330000	105610000	461720000	2	5	3	0	Q9Y2G5	GDP-fucose protein O-fucosyltransferase 2
Q6I9Y2	THOC7	1.01523	0.720757	0.867994	0.208224	11	11	11	70.6	70.6	70.6	23.743	0	86.018	1696600000	621250000	1075400000	2	6	9	9	Q6I9Y2	THO complex subunit 7 homolog
Q9UQ35	SRRM2	0.0838262	0.380204	0.232015	0.209571	67	67	67	32.3	32.3	32.3	299.61	0	323.31	25088000000	13225000000	11863000000	61	55	40	42	Q9UQ35	Serine/arginine repetitive matrix protein 2
Q12874	SF3A3	-0.0494917	-0.159018	-0.104255	0.0774468	17	17	17	39.5	39.5	39.5	58.848	0	323.31	8555400000	3076800000	5478600000	6	14	8	12	Q12874	Splicing factor 3A subunit 3
Q9HD45	TM9SF3	1.05208	0.926866	0.989471	0.0885397	16	16	16	24.4	24.4	24.4	67.887	0	88.102	9684300000	2208000000	7476300000	13	15	9	5	Q9HD45	Transmembrane 9 superfamily member 3
Q14152	EIF3A	0.141317	0.082683	0.112	0.0414605	103	103	103	56.2	56.2	56.2	166.57	0	323.31	118930000000	52623000000	66306000000	86	75	80	83	Q14152	Eukaryotic translation initiation factor 3 subunit A
Q9Y4L1	HYOU1	0.103416	0.0260304	0.0647233	0.0547199	63	63	63	65.7	65.7	65.7	111.33	0	323.31	140100000000	61539000000	78560000000	51	53	40	55	Q9Y4L1;Q9BXT5	Hypoxia up-regulated protein 1
P49321	NASP	1.42297	1.13133	1.27715	0.206221	43	43	43	58.4	58.4	58.4	85.237	0	323.31	35953000000	12551000000	23402000000	30	33	30	25	P49321	Nuclear autoantigenic sperm protein
P62312	LSM6	0.458121	0.531968	0.495045	0.0522177	13	13	13	92.5	92.5	92.5	9.1275	0	73.243	7600500000	3031400000	4569100000	1	12	6	9	P62312	U6 snRNA-associated Sm-like protein LSm6
O43617	TRAPPC3	-0.26368	-0.333022	-0.298351	0.0490322	8	8	8	51.7	51.7	51.7	20.274	0	29.308	1178300000	520700000	657640000	2	6	5	3	O43617	Trafficking protein particle complex subunit 3
P05023	ATP1A1	1.26422	1.07233	1.16827	0.135687	49	49	31	47.7	47.7	29.4	112.89	0	323.31	56134000000	15821000000	40313000000	44	43	37	30	P05023;P20648	Sodium/potassium-transporting ATPase subunit alpha-1
Q8N2G8	GHDC	0.708902	0.99431	0.851606	0.201814	6	6	6	10.8	10.8	10.8	57.522	0	8.6642	366520000	131640000	234880000	2	2	3	3	Q8N2G8	GH3 domain-containing protein
Q13952	NFYC	-0.105337	-0.920411	-0.512874	0.576344	3	3	3	7	7	7	50.302	0	13.029	653900000	305420000	348480000	2	3	3	1	Q13952	Nuclear transcription factor Y subunit gamma
P63167	DYNLL1	0.132487	0.153153	0.14282	0.0146131	7	7	4	65.2	65.2	39.3	10.366	0	200.59	10916000000	5653000000	5262600000	2	5	4	7	P63167	Dynein light chain 1, cytoplasmic
Q8N2K0	ABHD12	1.64803	1.7113	1.67967	0.0447386	12	12	12	36.7	36.7	36.7	45.096	0	49.751	1660500000	296450000	1364000000	7	8	6	4	Q8N2K0	Monoacylglycerol lipase ABHD12
Q9Y4Y9	LSM5	0.536473	0.615028	0.57575	0.0555468	4	4	4	56	56	56	9.9374	0	81.736	503680000	164550000	339130000	2	3	2	2	Q9Y4Y9	U6 snRNA-associated Sm-like protein LSm5
Q8IYB8	SUPV3L1	0.448795	0.532905	0.49085	0.0594748	20	20	20	30.9	30.9	30.9	87.99	0	96.62	7168900000	1619800000	5549100000	12	15	10	11	Q8IYB8	ATP-dependent RNA helicase SUPV3L1, mitochondrial
A6NC98	CCDC88B	2.45685	2.58329	2.52007	0.0894066	44	44	43	40	40	39.4	164.81	0	319.76	1735500000	390450000	1345000000	16	29	20	18	A6NC98	Coiled-coil domain-containing protein 88B
Q9H299	SH3BGRL3	-0.527896	-0.557531	-0.542714	0.0209551	11	11	11	55.9	55.9	55.9	10.438	0	134.3	22360000000	11811000000	10549000000	3	6	6	10	Q9H299	SH3 domain-binding glutamic acid-rich-like protein 3
Q00341	HDLBP	0.681772	0.804204	0.742988	0.0865725	62	62	62	55.6	55.6	55.6	141.45	0	323.31	26811000000	10827000000	15984000000	47	45	44	36	Q00341	Vigilin
O15127	SCAMP2	1.33004	1.84662	1.58833	0.365277	5	5	5	23.4	23.4	23.4	36.648	0	308.62	5498100000	1009800000	4488300000	4	4	4	3	O15127	Secretory carrier-associated membrane protein 2
P54727	RAD23B	-1.72739	-0.52416	-1.12577	0.850812	9	9	7	35.2	35.2	33.3	43.171	0	150.75	3235700000	2024500000	1211200000	4	4	6	6	P54727	UV excision repair protein RAD23 homolog B
Q6PIU2	NCEH1	0.306648		0.306648	#DIV/0!	10	10	10	33.8	33.8	33.8	45.807	0	38.534	1477600000	388130000	1089400000	5	8	7	2	Q6PIU2	Neutral cholesterol ester hydrolase 1
P20585	MSH3	0.348544		0.348544	#DIV/0!	18	18	18	21.5	21.5	21.5	127.41	0	66.473	801270000	384450000	416820000	11	11	9	4	P20585	DNA mismatch repair protein Msh3
Q13033	STRN3	0.391285		0.391285	#DIV/0!	4	3	3	7.5	6.3	6.3	87.208	0	34.577	299390000	128410000	170990000	2	3	4	0	Q13033	Striatin-3
Q9BPW8	NIPSNAP1	-0.315951	-0.141951	-0.228951	0.123037	15	15	15	62.7	62.7	62.7	33.31	0	323.31	8955700000	3465600000	5490100000	6	13	9	11	Q9BPW8	Protein NipSnap homolog 1
O00303	EIF3F	0.536332	0.444956	0.490644	0.0646126	14	14	14	55.2	55.2	55.2	37.563	0	323.31	14784000000	5561400000	9223000000	5	12	14	8	O00303	Eukaryotic translation initiation factor 3 subunit F
Q9UIQ6	LNPEP	0.95485	0.876926	0.915888	0.0551006	42	42	42	46.5	46.5	46.5	117.35	0	323.31	15089000000	5004100000	10085000000	33	32	31	32	Q9UIQ6	Leucyl-cystinyl aminopeptidase;Leucyl-cystinyl aminopeptidase, pregnancy serum form
Q9UKF6	CPSF3	0.293536	0.122933	0.208234	0.120635	19	19	19	35.8	35.8	35.8	77.485	0	244.89	5507700000	2701000000	2806700000	11	14	11	11	Q9UKF6	Cleavage and polyadenylation specificity factor subunit 3
Q9NRP0	OSTC	0.729949	0.883875	0.806912	0.108842	5	5	5	24.8	24.8	24.8	16.829	0	18.36	10777000000	3491900000	7284700000	1	2	5	4	Q9NRP0	Oligosaccharyltransferase complex subunit OSTC
Q14683	SMC1A	0.455905	0.565377	0.510641	0.0774084	77	77	77	63.4	63.4	63.4	143.23	0	323.31	37228000000	16402000000	20826000000	53	45	59	64	Q14683	Structural maintenance of chromosomes protein 1A
O60306	AQR	0.579513	0.564064	0.571788	0.0109241	67	67	66	49.2	49.2	48.7	171.29	0	323.31	20686000000	8619300000	12067000000	52	48	48	53	O60306	Intron-binding protein aquarius
O60701	UGDH	0.394812	1.39241	0.89361	0.705408	12	12	12	30.4	30.4	30.4	55.023	0	77.778	1398800000	360260000	1038500000	4	5	6	5	O60701	UDP-glucose 6-dehydrogenase
O00264	PGRMC1	0.855066	1.11218	0.983621	0.181807	12	12	11	47.2	47.2	42.6	21.671	0	116.12	6622200000	1474300000	5147900000	4	11	6	7	O00264	Membrane-associated progesterone receptor component 1
P62310	LSM3	0.465634	0.425652	0.445643	0.0282715	5	5	5	42.2	42.2	42.2	11.845	0	151.89	6414100000	2864700000	3549400000	4	4	3	4	P62310	U6 snRNA-associated Sm-like protein LSm3
A4D1P6	WDR91	0.49276		0.49276	#DIV/0!	3	3	3	4.8	4.8	4.8	83.343	0	9.1629	152930000	59260000	93674000	2	2	2	1	A4D1P6	WD repeat-containing protein 91
O94829	IPO13		0.225447	0.225447	#DIV/0!	7	7	7	11	11	11	108.19	0	22.768	395440000	165750000	229700000	3	5	1	4	O94829	Importin-13
Q9NXK8	FBXL12	1.1712		1.1712	#DIV/0!	6	6	6	31.9	31.9	31.9	37.026	0	233.13	816320000	224800000	591520000	3	5	4	1	Q9NXK8	F-box/LRR-repeat protein 12
Q96S97	MYADM	0.0346338	-0.0149052	0.00986429	0.0350294	4	4	4	19.3	19.3	19.3	35.273	0	61.254	6086800000	2274500000	3812300000	3	4	4	2	Q96S97	Myeloid-associated differentiation marker
P49821	NDUFV1	-0.551083	0.0426925	-0.254195	0.419863	15	15	15	50.4	50.4	50.4	50.817	0	323.31	7068200000	2915300000	4152900000	8	11	7	8	P49821	NADH dehydrogenase [ubiquinone] flavoprotein 1, mitochondrial
Q9NRY5	FAM114A2	0.0177526	0.454104	0.235928	0.308547	12	12	12	28.7	28.7	28.7	55.468	0	30.724	2019300000	624690000	1394600000	3	8	7	5	Q9NRY5	Protein FAM114A2
Q13011	ECH1	1.01203	0.910954	0.961491	0.0714715	23	23	23	70.1	70.1	70.1	35.816	0	323.31	98826000000	23808000000	75018000000	12	20	15	12	Q13011	Delta(3,5)-Delta(2,4)-dienoyl-CoA isomerase, mitochondrial
Q9BU61	NDUFAF3	0.0868348	0.123481	0.105158	0.0259128	7	7	7	54.9	54.9	54.9	20.35	0	81.155	1792500000	822840000	969690000	1	4	5	5	Q9BU61	NADH dehydrogenase [ubiquinone] 1 alpha subcomplex assembly factor 3
Q9UBJ2	ABCD2				#DIV/0!	2	2	2	2.8	2.8	2.8	83.232	0.0031199	1.8748	361310000	165000000	196300000	1	1	2	1	Q9UBJ2	ATP-binding cassette sub-family D member 2
Q9H5Z1	DHX35	1.20983	0.973296	1.09156	0.167255	6	6	6	9.8	9.8	9.8	78.909	0	14.25	350880000	133610000	217270000	4	2	4	3	Q9H5Z1	Probable ATP-dependent RNA helicase DHX35
O14561	NDUFAB1	0.360776	0.273861	0.317318	0.0614582	5	5	5	23.7	23.7	23.7	17.417	0	10.325	1909400000	694960000	1214500000	2	5	3	3	O14561	Acyl carrier protein, mitochondrial
P63261	ACTG1	0.932711	0.931505	0.932108	0.000852771	37	37	1	92.8	92.8	4.5	41.792	0	323.31	1155400000000	351160000000	804270000000	24	36	31	29	P63261	Actin, cytoplasmic 2;Actin, cytoplasmic 2, N-terminally processed
P04040	CAT	0.994944	0.803863	0.899404	0.135115	38	38	38	73.1	73.1	73.1	59.755	0	323.31	124300000000	32800000000	91496000000	15	33	21	20	P04040	Catalase
O95870	ABHD16A	-0.110519	0.128748	0.00911418	0.169187	7	7	7	15.2	15.2	15.2	63.243	0	39.974	903550000	365530000	538020000	0	5	6	1	O95870	Abhydrolase domain-containing protein 16A
Q96HW7	INTS4	-0.623956	-0.720049	-0.672002	0.067948	13	13	13	15.8	15.8	15.8	108.17	0	23.751	953900000	437030000	516870000	7	8	10	5	Q96HW7	Integrator complex subunit 4
Q96HV5	TMEM41A	1.74055	1.59447	1.66751	0.103294	5	5	5	19.3	19.3	19.3	29.665	0	44.411	504080000	75136000	428940000	1	4	2	2	Q96HV5	Transmembrane protein 41A
P49458	SRP9	0.622305	0.489925	0.556115	0.0936068	8	8	8	67.4	67.4	67.4	10.112	0	23.132	14806000000	6375000000	8430600000	3	6	6	6	P49458	Signal recognition particle 9 kDa protein
Q9BXK5	BCL2L13	0.609782	0.645697	0.627739	0.0253957	15	15	15	51.8	51.8	51.8	52.723	0	290.58	4402000000	1427500000	2974400000	12	13	8	6	Q9BXK5	Bcl-2-like protein 13
P13798	APEH	0.441804	0.372851	0.407327	0.0487571	25	25	25	49.7	49.7	49.7	81.224	0	323.31	24905000000	8332800000	16572000000	16	22	20	13	P13798	Acylamino-acid-releasing enzyme
A5YKK6	CNOT1	0.613427	0.371819	0.492623	0.170843	108	108	108	58.1	58.1	58.1	266.94	0	323.31	33349000000	15442000000	17907000000	78	77	78	75	A5YKK6	CCR4-NOT transcription complex subunit 1
Q8TEX9	IPO4	0.170735	0.287571	0.229153	0.0826155	46	46	46	52.4	52.4	52.4	118.71	0	323.31	27582000000	13746000000	13836000000	34	38	26	35	Q8TEX9	Importin-4
Q99798	ACO2	0.685009	0.710085	0.697547	0.0177314	42	42	42	56.3	56.3	56.3	85.424	0	323.31	38692000000	12555000000	26137000000	30	34	23	24	Q99798	Aconitate hydratase, mitochondrial
Q9NRN7	AASDHPPT	-0.80785	-0.833904	-0.820877	0.018423	11	11	11	49.8	49.8	49.8	35.776	0	154.58	5128100000	3596500000	1531600000	6	2	9	10	Q9NRN7	L-aminoadipate-semialdehyde dehydrogenase-phosphopantetheinyl transferase
Q9UBE0	SAE1	-0.461102	-0.345425	-0.403264	0.081796	23	23	23	71.4	71.4	71.4	38.449	0	323.31	13804000000	7589100000	6214400000	8	15	18	18	Q9UBE0	SUMO-activating enzyme subunit 1;SUMO-activating enzyme subunit 1, N-terminally processed
Q96HE7	ERO1L	-1.39639	-1.37077	-1.38358	0.0181161	21	21	19	60.5	60.5	55.3	54.392	0	323.31	23682000000	7624500000	16057000000	12	20	8	12	Q96HE7	ERO1-like protein alpha
P28066	PSMA5	0.228118	0.442697	0.335408	0.15173	17	17	17	69.3	69.3	69.3	26.411	0	323.31	43305000000	17985000000	25320000000	10	17	16	16	P28066	Proteasome subunit alpha type-5
Q99720	SIGMAR1	1.75393	1.51454	1.63423	0.169274	7	7	7	45.3	45.3	45.3	25.127	0	225.22	4990600000	949990000	4040600000	3	5	5	7	Q99720	Sigma non-opioid intracellular receptor 1
O75155	CAND2	4.10424	3.08137	3.5928	0.723278	20	17	17	22.6	20.2	20.2	135.25	0	64.632	853110000	71088000	782020000	7	14	11	6	O75155	Cullin-associated NEDD8-dissociated protein 2
P61970	NUTF2	0.368415	0.360276	0.364345	0.00575514	8	8	8	99.2	99.2	99.2	14.478	0	323.31	18687000000	7730100000	10957000000	6	7	7	5	P61970	Nuclear transport factor 2
O14737	PDCD5	0.501995	0.619734	0.560864	0.083254	9	9	9	64.8	64.8	64.8	14.285	0	42.761	8757600000	3879700000	4877900000	2	7	6	7	O14737	Programmed cell death protein 5
P08240	SRPR	0.0792111	0.0454953	0.0623532	0.0238407	31	31	31	59.1	59.1	59.1	69.81	0	323.31	9121700000	4013100000	5108600000	16	21	21	14	P08240	Signal recognition particle receptor subunit alpha
Q6IBS0	TWF2	0.611808	0.977397	0.794602	0.25851	18	18	16	63	63	59	39.548	0	323.31	18143000000	5945000000	12198000000	8	16	12	14	Q6IBS0	Twinfilin-2
O43504	LAMTOR5	-0.955958	-1.07458	-1.01527	0.0838784	6	6	6	96.7	96.7	96.7	9.6138	0	241.89	3122300000	1751400000	1370900000	5	6	5	6	O43504	Ragulator complex protein LAMTOR5
Q96DM3	C18orf8	1.14646	0.314351	0.730407	0.58839	7	7	7	14.8	14.8	14.8	74.974	0	29.167	1650300000	486610000	1163700000	4	4	4	2	Q96DM3	Uncharacterized protein C18orf8
Q02218	OGDH	0.795225	0.762655	0.77894	0.0230305	52	52	40	52.9	52.9	46.2	115.93	0	323.31	23866000000	7712600000	16153000000	29	43	30	32	Q02218	2-oxoglutarate dehydrogenase, mitochondrial
Q5TGZ0	MINOS1	0.338601	0.280107	0.309354	0.0413615	5	5	5	83.3	83.3	83.3	8.8081	0	29.239	2770100000	1086100000	1684000000	1	3	2	4	Q5TGZ0	MICOS complex subunit MIC10
Q16762	TST	-1.0088	-1.00649	-1.00765	0.00163342	13	13	13	61.6	61.6	61.6	33.429	0	167.14	2947700000	1532700000	1415000000	2	6	11	6	Q16762	Thiosulfate sulfurtransferase
O75390	CS	0.503577	0.835284	0.66943	0.234552	18	18	18	47.6	47.6	47.6	51.712	0	323.31	33993000000	11754000000	22240000000	9	16	17	8	O75390	Citrate synthase, mitochondrial
P04229;Q29974;Q30154;P13760;Q30167;Q30134	HLA-DRB1;HLA-DRB5				#DIV/0!	10	10	2	47	47	7.1	29.914	0	169.31	3367400000	207780000	3159600000	3	9	2	1	P04229;Q29974;Q30154;P13760;Q30167;Q30134;Q9TQE0;P79483;P13761;Q9GIY3;P13762	HLA class II histocompatibility antigen, DRB1-1 beta chain;HLA class II histocompatibility antigen, DRB1-16 beta chain;HLA class II histocompatibility antigen, DR beta 5 chain;HLA class II histocompatibility antigen, DRB1-4 beta chain;HLA class II histocompatibility antigen, DRB1-10 beta chain;HLA class II histocompatibility antigen, DRB1-8 beta chain
P26639	TARS	0.858226	0.71393	0.786078	0.102033	39	39	34	55	55	49.2	83.434	0	323.31	62736000000	22176000000	40560000000	28	32	27	32	P26639	Threonine--tRNA ligase, cytoplasmic
P46977	STT3A	0.612887	0.616683	0.614785	0.00268418	24	24	23	32.3	32.3	31.3	80.529	0	136.66	30228000000	10683000000	19545000000	17	22	21	17	P46977	Dolichyl-diphosphooligosaccharide--protein glycosyltransferase subunit STT3A
P08708	RPS17	-0.13341	0.0814363	-0.0259866	0.151919	13	13	13	68.9	68.9	68.9	15.55	0	323.31	35150000000	18097000000	17053000000	8	11	9	11	P08708	40S ribosomal protein S17
Q5THJ4	VPS13D	0.429988	0.349997	0.389992	0.0565622	51	51	51	15	15	15	491.91	0	57.964	329970000	186910000	143060000	47	17	2	6	Q5THJ4	Vacuolar protein sorting-associated protein 13D
Q9BRG1	VPS25	0.457235	0.602753	0.529994	0.102897	13	13	13	81.8	81.8	81.8	20.747	0	154.13	6607100000	2883700000	3723400000	6	10	9	12	Q9BRG1	Vacuolar protein-sorting-associated protein 25
P61221	ABCE1	-0.643216	-0.682421	-0.662819	0.0277221	35	35	35	61.9	61.9	61.9	67.314	0	323.31	22221000000	12227000000	9994000000	16	23	26	21	P61221	ATP-binding cassette sub-family E member 1
O60613	2015-09-01	0.035635	-0.0677782	-0.0160716	0.0731242	5	5	5	32.1	32.1	32.1	18.092	0	31.594	1525400000	557880000	967500000	2	4	3	4	O60613	15 kDa selenoprotein
Q9UEU0	VTI1B	-0.121638	0.0443999	-0.0386189	0.117407	5	5	5	26.7	26.7	26.7	26.688	0	141.24	905880000	382270000	523620000	1	3	4	2	Q9UEU0	Vesicle transport through interaction with t-SNAREs homolog 1B
Q6Y1H2	HACD2	1.08692	0.749903	0.91841	0.238307	6	6	6	24	24	24	28.368	0	7.6351	533540000	159710000	373830000	2	4	4	2	Q6Y1H2	Very-long-chain (3R)-3-hydroxyacyl-CoA dehydratase 2
Q71U36;P0DPH8;P0DPH7	TUBA1A	-0.751117	-0.16008	-0.455598	0.417926	39	2	1	84.7	6	3.1	50.135	0	29.05	21457000000	9706500000	11751000000	27	31	34	33	Q71U36;P0DPH8;P0DPH7;Q6PEY2	Tubulin alpha-1A chain
O43432	EIF4G3	1.80175	0.942313	1.37203	0.607714	33	28	28	25.6	22.5	22.5	176.65	0	68.993	1242600000	319820000	922790000	21	27	15	11	O43432	Eukaryotic translation initiation factor 4 gamma 3
Q86WC6	PPP1R27				#DIV/0!	5	5	5	44.8	44.8	44.8	17.438	0	23.768	341580000	16312000	325270000	1	5	1	2	Q86WC6	Protein phosphatase 1 regulatory subunit 27
Q15008	PSMD6	0.0563397	0.0436273	0.0499835	0.00898902	30	30	30	68.1	68.1	68.1	45.531	0	216.94	15754000000	6734000000	9020400000	11	19	25	7	Q15008	26S proteasome non-ATPase regulatory subunit 6
Q96JJ3	ELMO2	3.91457	3.45797	3.68627	0.322865	22	17	17	38.5	33.3	33.3	82.614	0	323.31	1721000000	81687000	1639300000	10	20	12	9	Q96JJ3	Engulfment and cell motility protein 2
Q13907	IDI1	0.522452	0.725888	0.62417	0.143851	12	12	12	63.4	63.4	63.4	26.319	0	323.31	8684400000	2640500000	6043900000	7	12	10	11	Q13907;Q9BXS1	Isopentenyl-diphosphate Delta-isomerase 1
O00429	DNM1L	-0.119941	0.00508432	-0.0574283	0.0884063	43	43	43	63.6	63.6	63.6	81.876	0	323.31	10086000000	4715600000	5370000000	21	35	22	24	O00429	Dynamin-1-like protein
Q5XKP0	QIL1	-0.00304397	0.0701554	0.0335557	0.0517598	6	6	6	77.1	77.1	77.1	13.087	0	123.05	3351500000	1724700000	1626800000	3	2	5	5	Q5XKP0	Protein QIL1
Q9Y5L4	TIMM13	-0.241091	-0.257676	-0.249384	0.0117274	7	7	7	78.9	78.9	78.9	10.5	0	44.797	2901900000	1672300000	1229600000	2	4	5	6	Q9Y5L4	Mitochondrial import inner membrane translocase subunit Tim13
P67809	YBX1	0.833255	0.860746	0.847001	0.0194391	16	16	11	60.8	60.8	48.1	35.924	0	323.31	15378000000	5560500000	9817000000	1	15	15	9	P67809;Q9Y2T7	Nuclease-sensitive element-binding protein 1
P04424	ASL	0.392206		0.392206	#DIV/0!	6	6	6	18.5	18.5	18.5	51.657	0	21.576	522990000	181840000	341150000	2	3	5	0	P04424	Argininosuccinate lyase
O95490	LPHN2				#DIV/0!	18	18	18	16.5	16.5	16.5	163.35	0	202.11	676170000	105090000	571080000	10	13	3	4	O95490	Latrophilin-2
Q9Y3C6	PPIL1	-0.821309	-0.289912	-0.555611	0.375754	5	5	5	30.7	30.7	30.7	18.237	0	46.438	2916700000	1633900000	1282800000	1	5	3	4	Q9Y3C6	Peptidyl-prolyl cis-trans isomerase-like 1
Q9Y394	DHRS7	-0.173197	-0.0623679	-0.117782	0.078368	13	13	13	46	46	46	38.298	0	248.67	5086200000	1875000000	3211200000	7	7	12	5	Q9Y394	Dehydrogenase/reductase SDR family member 7
Q8NCM8	DYNC2H1		1.89357	1.89357	#DIV/0!	7	7	7	1.8	1.8	1.8	492.62	0	3.7288	382410000	140610000	241810000	2	1	2	4	Q8NCM8	Cytoplasmic dynein 2 heavy chain 1
Q9NUN5	LMBRD1	0.410974	0.594907	0.50294	0.13006	2	2	2	5.6	5.6	5.6	61.388	0	102.76	1060000000	332210000	727830000	2	2	1	1	Q9NUN5	Probable lysosomal cobalamin transporter
Q86YH6	PDSS2	-0.973214		-0.973214	#DIV/0!	3	3	3	8.8	8.8	8.8	44.128	0	4.9527	259030000	120600000	138430000	2	1	2	1	Q86YH6	Decaprenyl-diphosphate synthase subunit 2
Q9Y6A5	TACC3				#DIV/0!	11	11	11	19.1	19.1	19.1	90.359	0	96.983	408230000	128320000	279910000	9	5	0	2	Q9Y6A5	Transforming acidic coiled-coil-containing protein 3
P37108	SRP14	0.639127	0.794172	0.716649	0.109633	13	13	13	74.3	74.3	74.3	14.57	0	183.73	31643000000	11198000000	20444000000	5	11	10	11	P37108	Signal recognition particle 14 kDa protein
P49368	CCT3	0.505158	0.426794	0.465976	0.0554117	39	39	39	66.1	66.1	66.1	60.533	0	323.31	131640000000	46165000000	85471000000	14	37	27	31	P49368	T-complex protein 1 subunit gamma
Q13043	STK4	1.09346	-0.0986685	0.497394	0.842962	10	10	5	25.1	25.1	11.7	55.63	0	61.306	1366100000	393640000	972410000	2	7	7	2	Q13043	Serine/threonine-protein kinase 4;Serine/threonine-protein kinase 4 37kDa subunit;Serine/threonine-protein kinase 4 18kDa subunit
Q9HCU5	PREB	1.82375	2.21552	2.01963	0.277023	11	11	11	40.8	40.8	40.8	45.468	0	304.66	1811400000	376790000	1434700000	5	8	7	2	Q9HCU5	Prolactin regulatory element-binding protein
Q8NBN3	TMEM87A	0.74775	0.663608	0.705679	0.0594974	10	10	10	25.9	25.9	25.9	63.429	0	27.45	713660000	153930000	559730000	6	8	3	4	Q8NBN3	Transmembrane protein 87A
Q9Y5S1	TRPV2	-1.45997		-1.45997	#DIV/0!	8	8	8	12.6	12.6	12.6	85.98	0	13.207	286840000	226590000	60257000	4	0	7	5	Q9Y5S1	Transient receptor potential cation channel subfamily V member 2
Q9Y4G6	TLN2	0.342712		0.342712	#DIV/0!	25	8	8	9.3	4	4	271.61	0	5.5684	519730000	277600000	242130000	17	17	21	17	Q9Y4G6	Talin-2
P16333	NCK1	0.606129		0.606129	#DIV/0!	5	5	4	13.8	13.8	11.7	42.864	0	17.938	320390000	120110000	200290000	1	2	4	1	P16333	Cytoplasmic protein NCK1
P61086	UBE2K	0.34996	0.51108	0.43052	0.113929	17	17	17	83.5	83.5	83.5	22.406	0	272.57	15228000000	5715400000	9513100000	5	13	11	16	P61086	Ubiquitin-conjugating enzyme E2 K
P21912	SDHB	0.873941	0.719322	0.796631	0.109332	15	15	15	43.6	43.6	43.6	31.629	0	50.129	18197000000	4625300000	13572000000	5	11	13	12	P21912	Succinate dehydrogenase [ubiquinone] iron-sulfur subunit, mitochondrial
Q8TCU6	PREX1	3.60827	2.28479	2.94653	0.935842	30	30	30	23.2	23.2	23.2	186.2	0	129.37	1237300000	121770000	1115500000	16	20	16	14	Q8TCU6	Phosphatidylinositol 3,4,5-trisphosphate-dependent Rac exchanger 1 protein
Q9Y221	NIP7	-0.192969	-0.18528	-0.189124	0.00543694	10	10	10	73.3	73.3	73.3	20.462	0	110.73	2473200000	1456600000	1016700000	3	3	7	6	Q9Y221	60S ribosome subunit biogenesis protein NIP7 homolog
P53621	COPA	0.526571	0.445662	0.486116	0.0572113	92	92	92	74.8	74.8	74.8	138.34	0	323.31	88659000000	37542000000	51117000000	70	71	71	80	P53621	Coatomer subunit alpha;Xenin;Proxenin
P00568	AK1	1.31649	1.24164	1.27906	0.0529269	11	11	11	59.8	59.8	59.8	21.635	0	61.685	2227700000	749270000	1478400000	1	9	4	6	P00568;Q9Y6K8	Adenylate kinase isoenzyme 1
Q14686	NCOA6				#DIV/0!	6	6	6	5	5	5	219.14	0	4.7439	49615000	18862000	30753000	3	4	0	0	Q14686	Nuclear receptor coactivator 6
Q96EK9	KTI12	0.512182	0.283377	0.397779	0.16179	5	5	5	21.5	21.5	21.5	38.615	0	68.883	356550000	140370000	216180000	1	2	4	2	Q96EK9	Protein KTI12 homolog
Q8WV19	SFT2D1	1.52893	1.52863	1.52878	0.000212132	2	2	2	17.6	17.6	17.6	17.804	0	224.84	1573700000	366000000	1207700000	2	2	1	1	Q8WV19	Vesicle transport protein SFT2A
P60033	CD81	0.432088	0.622907	0.527497	0.134929	4	4	4	28.4	28.4	28.4	25.809	0	323.31	4228300000	1328700000	2899600000	3	3	4	3	P60033	CD81 antigen
Q9BVC6	TMEM109	-1.68947	-1.11502	-1.40225	0.406197	5	5	5	13.2	13.2	13.2	26.21	0	29.533	12406000000	7319700000	5085900000	2	4	4	4	Q9BVC6	Transmembrane protein 109
Q969U7	PSMG2	0.172428	0.344159	0.258293	0.121432	6	6	6	22	22	22	29.396	0	17.48	1480500000	523890000	956630000	1	5	4	3	Q969U7	Proteasome assembly chaperone 2
P17152	TMEM11	-0.546852	-0.415528	-0.48119	0.0928601	4	4	4	25	25	25	21.541	0	35.728	1739900000	844760000	895100000	2	3	2	3	P17152	Transmembrane protein 11, mitochondrial
Q6P3W7	SCYL2	-1.70046	-1.80891	-1.75469	0.0766857	5	5	5	8.5	8.5	8.5	103.71	0	45.569	899220000	522890000	376330000	5	3	4	2	Q6P3W7	SCY1-like protein 2
P09211	GSTP1	0.784395	0.812368	0.798381	0.0197799	19	19	19	71	71	71	23.356	0	323.31	173380000000	62563000000	110810000000	11	13	13	16	P09211	Glutathione S-transferase P
P31040	SDHA	0.769683	0.586245	0.677964	0.12971	31	31	31	64.8	64.8	64.8	72.691	0	323.31	33420000000	7658600000	25762000000	14	28	22	11	P31040	Succinate dehydrogenase [ubiquinone] flavoprotein subunit, mitochondrial
Q96PC5	MIA2	0.695584	0.318468	0.507026	0.266661	12	12	10	10.3	10.3	8.9	159.83	0	22.824	884980000	364990000	519990000	9	2	8	3	Q96PC5;Q86UF2;A4D2H0;Q8IX94;P0CG41;A4FU28;Q8IX95	Melanoma inhibitory activity protein 2
Q8WVM8	SCFD1	0.853543	0.738708	0.796125	0.0812006	26	26	26	55.1	55.1	55.1	72.379	0	323.31	15659000000	5708300000	9950800000	17	19	17	12	Q8WVM8	Sec1 family domain-containing protein 1
Q8IWB9	TEX2	-2.08654		-2.08654	#DIV/0!	8	8	8	11.4	11.4	11.4	125.3	0	5.8364	637390000	208100000	429290000	6	3	3	1	Q8IWB9	Testis-expressed sequence 2 protein
P16278	GLB1	1.79126	2.18478	1.98802	0.278261	14	14	14	31.2	31.2	31.2	76.074	0	219.44	10532000000	2378900000	8153100000	7	14	10	10	P16278;Q6UWU2	Beta-galactosidase
Q16134	ETFDH	0.0287281	0.0150969	0.0219125	0.00963871	17	17	17	42.3	42.3	42.3	68.495	0	191.84	2422600000	662900000	1759700000	4	14	6	3	Q16134	Electron transfer flavoprotein-ubiquinone oxidoreductase, mitochondrial
P16435	POR	0.507885	0.717407	0.612646	0.148154	21	21	21	40.6	40.6	40.6	76.689	0	197.24	2690800000	885410000	1805400000	7	18	10	10	P16435	NADPH--cytochrome P450 reductase
Q9UQE7	SMC3	0.852135	0.88777	0.869953	0.0251978	80	80	80	58.8	58.8	58.8	141.54	0	323.31	36003000000	14810000000	21193000000	51	55	51	64	Q9UQE7	Structural maintenance of chromosomes protein 3
Q8NAT1	POMGNT2				#DIV/0!	4	4	4	9.1	9.1	9.1	66.615	0	7.7217	126960000	52577000	74386000	3	1	1	0	Q8NAT1	Protein O-linked-mannose beta-1,4-N-acetylglucosaminyltransferase 2
Q9BUT1	BDH2	-0.0989817	-0.709016	-0.403999	0.431359	2	2	2	11	11	11	26.724	0	19.469	1055600000	497550000	558070000	2	2	2	2	Q9BUT1	3-hydroxybutyrate dehydrogenase type 2
Q9NSD9	FARSB	0.433287	0.388693	0.41099	0.0315327	33	33	33	57.9	57.9	57.9	66.115	0	323.31	38373000000	14815000000	23558000000	21	26	21	23	Q9NSD9	Phenylalanine--tRNA ligase beta subunit
Q9BTE3	MCMBP	0.878916	0.71405	0.796483	0.116578	15	15	15	31.8	31.8	31.8	72.979	0	159.29	3805200000	1612300000	2193000000	9	10	10	5	Q9BTE3	Mini-chromosome maintenance complex-binding protein
Q86V81	ALYREF	-0.369007	-0.880887	-0.624947	0.361954	9	9	9	40.1	40.1	40.1	26.888	0	323.31	7018500000	3213800000	3804700000	6	4	9	7	Q86V81	THO complex subunit 4
O94804	STK10	1.62013	1.56655	1.59334	0.0378868	33	31	31	36.5	34.4	34.4	112.13	0	240.23	5843500000	1600300000	4243200000	18	21	20	24	O94804	Serine/threonine-protein kinase 10
Q16643	DBN1	0.437028	0.280419	0.358723	0.110739	17	17	17	30.2	30.2	30.2	71.428	0	321.98	3555600000	1387100000	2168400000	8	11	11	6	Q16643	Drebrin
O95777	LSM8	0.848023	0.945552	0.896788	0.0689634	8	8	8	79.2	79.2	79.2	10.403	0	175.63	9479300000	3343400000	6136000000	3	6	7	6	O95777	U6 snRNA-associated Sm-like protein LSm8
P34932	HSPA4	0.614101	0.586505	0.600303	0.0195133	63	63	59	79.9	79.9	76.2	94.33	0	323.31	82168000000	28523000000	53645000000	44	58	47	37	P34932	Heat shock 70 kDa protein 4
Q86UY8	NT5DC3	0.625388		0.625388	#DIV/0!	4	4	4	11.5	11.5	11.5	63.419	0	44.646	171080000	58799000	112280000	3	2	2	0	Q86UY8	5-nucleotidase domain-containing protein 3
P67870	CSNK2B	0.202779	0.143028	0.172903	0.0422503	10	10	10	61.9	61.9	61.9	24.942	0	323.31	12996000000	4931700000	8064500000	4	8	10	10	P67870	Casein kinase II subunit beta
Q8WWC4	C2orf47	0.287513	0.395831	0.341672	0.0765924	7	7	7	25.1	25.1	25.1	32.544	0	27.015	1158500000	593960000	564560000	1	3	4	4	Q8WWC4	Uncharacterized protein C2orf47, mitochondrial
Q71UI9;P0C0S5	H2AFV;H2AFZ	0.23637	0.295465	0.265918	0.0417865	7	5	5	53.9	46.9	46.9	13.509	0	110.35	11865000000	4989000000	6876000000	4	7	6	6	Q71UI9;P0C0S5	Histone H2A.V;Histone H2A.Z
P20042	EIF2S2	0.528556	-0.0310037	0.248776	0.395668	24	24	24	69.7	69.7	69.7	38.388	0	301.67	4390700000	1691300000	2699500000	4	14	15	4	P20042	Eukaryotic translation initiation factor 2 subunit 2
O00299	CLIC1	0.801643	0.831151	0.816397	0.0208653	22	22	22	87.1	87.1	87.1	26.922	0	323.31	139200000000	38770000000	100430000000	13	21	16	17	O00299	Chloride intracellular channel protein 1
P12268	IMPDH2	0.451613	0.537716	0.494665	0.060884	25	25	24	52.9	52.9	51.4	55.804	0	323.31	38162000000	13992000000	24171000000	12	20	18	18	P12268	Inosine-5-monophosphate dehydrogenase 2
O95456	PSMG1	0.218808	0.171939	0.195374	0.0331414	12	12	12	48.3	48.3	48.3	32.854	0	68.931	4882200000	2265900000	2616400000	3	9	7	8	O95456	Proteasome assembly chaperone 1
B7ZBB8	PPP1R3G				#DIV/0!	4	4	4	14	14	14	38.018	0	5.6571	125590000	57400000	68189000	2	2	0	0	B7ZBB8	Protein phosphatase 1 regulatory subunit 3G
Q9H3K6	BOLA2	-0.736657	-0.703699	-0.720178	0.0233048	8	8	8	86	86	86	10.116	0	160.19	6452500000	3900900000	2551600000	2	6	5	8	Q9H3K6	BolA-like protein 2
O43598	DNPH1	-0.0668922	-0.0714885	-0.0691903	0.00325007	10	10	10	58	58	58	19.108	0	156.38	11176000000	4448100000	6728000000	5	5	5	9	O43598	2-deoxynucleoside 5-phosphate N-hydrolase 1
P36954	POLR2I	0.00288017	0.579752	0.291316	0.40791	7	7	7	78.4	78.4	78.4	14.523	0	165.23	689490000	361650000	327840000	1	4	4	5	P36954	DNA-directed RNA polymerase II subunit RPB9
Q9P215	POGK				#DIV/0!	3	3	3	6.7	6.7	6.7	69.443	0	23.208	59566000	35249000	24316000	3	0	1	2	Q9P215	Pogo transposable element with KRAB domain
P49773	HINT1	0.203464	0.406409	0.304936	0.143504	13	13	13	87.3	87.3	87.3	13.802	0	321.19	33611000000	14920000000	18691000000	4	11	9	11	P49773	Histidine triad nucleotide-binding protein 1
Q96CS3	FAF2	0.559729		0.559729	#DIV/0!	8	8	8	23.6	23.6	23.6	52.623	0	87.639	1250800000	459820000	790980000	2	4	7	1	Q96CS3	FAS-associated factor 2
O75533	SF3B1	-0.149707	-0.100679	-0.125193	0.034668	78	78	78	67.4	67.4	67.4	145.83	0	323.31	90008000000	41616000000	48392000000	55	61	56	65	O75533	Splicing factor 3B subunit 1
Q96RQ3	MCCC1	0.798013	0.768705	0.783359	0.0207239	18	18	18	43.6	43.6	43.6	80.472	0	202.35	2899900000	1003900000	1896000000	10	11	10	5	Q96RQ3	Methylcrotonoyl-CoA carboxylase subunit alpha, mitochondrial
Q15418	RPS6KA1	-0.337547	-0.950662	-0.644104	0.433538	23	23	16	44.4	44.4	32.8	82.722	0	224.83	4569300000	2000700000	2568600000	8	19	9	11	Q15418;Q15349	Ribosomal protein S6 kinase alpha-1
P01130	LDLR		0.619988	0.619988	#DIV/0!	6	6	6	9.3	9.3	9.3	95.375	0	33.415	310960000	88080000	222880000	3	4	1	3	P01130	Low-density lipoprotein receptor
Q96GK7;Q6P2I3	FAHD2A;FAHD2B	1.91583	1.62636	1.7711	0.204686	9	9	9	39.5	39.5	39.5	34.596	0	149.48	1546100000	235330000	1310800000	5	7	6	4	Q96GK7;Q6P2I3	Fumarylacetoacetate hydrolase domain-containing protein 2A;Fumarylacetoacetate hydrolase domain-containing protein 2B
Q9NTI5	PDS5B	0.469159	0.438735	0.453947	0.021513	65	58	58	49.8	46	46	164.67	0	323.31	24498000000	10167000000	14331000000	47	48	44	50	Q9NTI5	Sister chromatid cohesion protein PDS5 homolog B
Q12882	DPYD				#DIV/0!	15	15	15	22.2	22.2	22.2	111.4	0	153.69	645840000	47090000	598750000	6	14	1	0	Q12882	Dihydropyrimidine dehydrogenase [NADP(+)]
Q9UI12	ATP6V1H	0.417789	0.678632	0.548211	0.184444	12	12	12	35.6	35.6	35.6	55.882	0	203.87	3409700000	1212000000	2197800000	7	6	7	4	Q9UI12	V-type proton ATPase subunit H
P62820	RAB1A	0.487107	0.364132	0.42562	0.0869565	16	16	9	72.7	72.7	45.9	22.677	0	323.31	39973000000	12982000000	26991000000	8	14	10	14	P62820	Ras-related protein Rab-1A
P06576	ATP5B	0.505158	0.296391	0.400775	0.147621	27	27	27	77.1	77.1	77.1	56.559	0	323.31	226450000000	77597000000	148850000000	24	21	22	23	P06576	ATP synthase subunit beta, mitochondrial
O75821	EIF3G	0.108546	0.373146	0.240846	0.1871	14	14	14	49.1	49.1	49.1	35.611	0	278.48	9947800000	4216400000	5731400000	7	9	11	7	O75821	Eukaryotic translation initiation factor 3 subunit G
Q562E7	WDR81	-0.401383	-0.773238	-0.58731	0.262941	18	18	18	12.5	12.5	12.5	211.69	0	28.377	626350000	320180000	306170000	12	8	9	3	Q562E7	WD repeat-containing protein 81
P61026	RAB10	0.175999	-0.135594	0.0202022	0.22033	15	14	13	59.5	54	50.5	22.541	0	146.64	15341000000	6364300000	8976200000	4	13	10	14	P61026	Ras-related protein Rab-10
Q96RP9	GFM1	1.12947	1.12459	1.12703	0.00345068	28	28	28	44.9	44.9	44.9	83.471	0	180.11	6520500000	1894900000	4625700000	14	17	14	14	Q96RP9	Elongation factor G, mitochondrial
Q0VGL1	LAMTOR4	-0.911576	-0.837847	-0.874712	0.0521343	5	5	5	37.4	37.4	37.4	10.741	0	43.884	1966900000	1145200000	821710000	2	3	3	5	Q0VGL1	Ragulator complex protein LAMTOR4;Ragulator complex protein LAMTOR4, N-terminally processed
Q9H300	PARL	1.36547	1.65166	1.50857	0.202367	4	4	4	12.9	12.9	12.9	42.19	0	4.6181	343200000	89890000	253310000	2	3	4	2	Q9H300	Presenilins-associated rhomboid-like protein, mitochondrial;P-beta
Q9UPT8	ZC3H4	0.555689	0.369015	0.462352	0.131998	25	25	25	27.8	27.8	27.8	140.26	0	306.81	4191900000	1856900000	2335000000	17	18	18	14	Q9UPT8	Zinc finger CCCH domain-containing protein 4
O75531	BANF1	-1.71733	-1.71602	-1.71668	0.00092631	17	17	17	88.8	88.8	88.8	10.058	0	114.07	36616000000	27838000000	8777900000	7	11	11	15	O75531	Barrier-to-autointegration factor;Barrier-to-autointegration factor, N-terminally processed
Q13287	NMI	0.65526		0.65526	#DIV/0!	6	6	6	23.1	23.1	23.1	35.056	0	19.7	598620000	213080000	385540000	2	1	4	0	Q13287	N-myc-interactor
P51570	GALK1	0.244248	0.045226	0.144737	0.14073	9	9	9	23	23	23	42.272	0	95.125	3396000000	1149900000	2246100000	3	5	8	5	P51570	Galactokinase
P61081	UBE2M	0.500987	0.623667	0.562327	0.0867479	10	10	10	54.1	54.1	54.1	20.9	0	89.059	12378000000	4516800000	7861300000	3	7	7	7	P61081	NEDD8-conjugating enzyme Ubc12
P30825	SLC7A1	0.624986	0.616555	0.620771	0.00596162	8	8	8	11	11	11	67.638	0	30.066	3325500000	1210700000	2114800000	4	6	6	5	P30825;P52569	High affinity cationic amino acid transporter 1
P83436	COG7	0.289143		0.289143	#DIV/0!	13	13	13	23.6	23.6	23.6	86.343	0	33.055	668400000	256470000	411940000	5	8	5	2	P83436	Conserved oligomeric Golgi complex subunit 7
Q9BYC9	MRPL20	-0.359162	-0.140985	-0.250074	0.154274	7	7	7	45.6	45.6	45.6	17.442	0	28.506	1860300000	1120800000	739490000	1	3	6	5	Q9BYC9	39S ribosomal protein L20, mitochondrial
Q96CT7	CCDC124	-1.22366	-1.52213	-1.3729	0.21105	8	8	8	37.2	37.2	37.2	25.835	0	62.125	1639700000	1137900000	501800000	1	5	6	3	Q96CT7	Coiled-coil domain-containing protein 124
O14672	ADAM10	0.711324	1.12824	0.919784	0.294804	22	22	22	37.6	37.6	37.6	84.141	0	141.36	2484300000	481350000	2002900000	8	20	5	6	O14672	Disintegrin and metalloproteinase domain-containing protein 10
Q9Y3D0	FAM96B	-0.555817	-0.568046	-0.561931	0.00864721	7	7	7	84	84	84	17.663	0	221.45	2082400000	1276900000	805550000	3	3	5	5	Q9Y3D0	Mitotic spindle-associated MMXD complex subunit MIP18
Q96KP4	CNDP2	-0.628031	-0.580571	-0.604301	0.0335593	27	27	27	70.5	70.5	70.5	52.878	0	323.31	15266000000	8085700000	7180700000	13	14	22	17	Q96KP4	Cytosolic non-specific dipeptidase
Q96H79	ZC3HAV1L	0.760176	1.19424	0.97721	0.30693	8	8	8	44	44	44	32.962	0	104.63	1537600000	580010000	957640000	2	4	6	2	Q96H79	Zinc finger CCCH-type antiviral protein 1-like
Q9Y3A5	SBDS	0.496806	0.187487	0.342146	0.218722	12	12	12	47.2	47.2	47.2	28.763	0	299.51	2492300000	835680000	1656600000	3	9	8	3	Q9Y3A5	Ribosome maturation protein SBDS
Q5TC12	ATPAF1	2.38521	2.28972	2.33747	0.0675216	11	11	11	31.4	31.4	31.4	36.436	0	25.818	1045400000	253040000	792360000	5	6	8	2	Q5TC12	ATP synthase mitochondrial F1 complex assembly factor 1
P55884	EIF3B	0.483475	0.477102	0.480288	0.00450639	42	42	42	59.6	59.6	59.6	92.48	0	323.31	40460000000	15997000000	24464000000	24	37	34	30	P55884	Eukaryotic translation initiation factor 3 subunit B
Q15435	PPP1R7	-0.310807	0.107009	-0.101899	0.295441	14	14	14	45	45	45	41.564	0	323.31	6481700000	3386000000	3095700000	6	11	11	5	Q15435	Protein phosphatase 1 regulatory subunit 7
Q9Y6D9	MAD1L1	0.404131	0.741897	0.573014	0.238837	11	11	11	21	21	21	83.066	0	79.102	839840000	455700000	384140000	4	5	5	5	Q9Y6D9	Mitotic spindle assembly checkpoint protein MAD1
Q9NZ32	ACTR10	-0.0840008		-0.0840008	#DIV/0!	11	11	11	31.9	31.9	31.9	46.306	0	71.352	1266200000	703180000	563070000	4	7	9	1	Q9NZ32	Actin-related protein 10
Q9UDW1	UQCR10	0.225415	0.228183	0.226799	0.00195727	6	6	6	52.4	52.4	52.4	7.3084	0	96.41	8774600000	3792300000	4982300000	4	6	5	6	Q9UDW1	Cytochrome b-c1 complex subunit 9
Q9UQ13	SHOC2	0.274911	0.00784104	0.141376	0.188847	12	12	12	34	34	34	64.887	0	195.53	2090600000	781760000	1308900000	6	10	7	6	Q9UQ13	Leucine-rich repeat protein SHOC-2
Q8NFC6	BOD1L1	2.11001	1.76116	1.93558	0.246674	68	68	68	31.3	31.3	31.3	330.46	0	323.31	2570200000	1078200000	1492100000	48	46	24	35	Q8NFC6;Q96IK1	Biorientation of chromosomes in cell division protein 1-like 1
Q86XA9	HEATR5A	0.362962	0.672614	0.517788	0.218957	14	12	12	9.1	8.1	8.1	222	0	31.288	249120000	104750000	144370000	5	7	5	4	Q86XA9	HEAT repeat-containing protein 5A
O95989	NUDT3	-1.48362	-0.821818	-1.15272	0.467965	7	7	6	44.8	44.8	40.7	19.471	0	136.71	3949400000	2262600000	1686900000	1	5	4	6	O95989	Diphosphoinositol polyphosphate phosphohydrolase 1
Q96EY8	MMAB	2.40769	1.6128	2.01024	0.562072	6	6	6	28.4	28.4	28.4	27.388	0	40.684	754150000	182920000	571240000	3	3	4	4	Q96EY8	Cob(I)yrinic acid a,c-diamide adenosyltransferase, mitochondrial
P22570	FDXR	-2.12477	-2.24398	-2.18437	0.0842942	15	15	15	41.5	41.5	41.5	53.836	0	24.841	1240700000	932000000	308710000	3	4	12	3	P22570	NADPH:adrenodoxin oxidoreductase, mitochondrial
O00329	PIK3CD	4.20033	3.26323	3.73178	0.66263	29	29	27	33	33	31.5	119.48	0	75.219	1623000000	159510000	1463500000	15	17	12	13	O00329	Phosphatidylinositol 4,5-bisphosphate 3-kinase catalytic subunit delta isoform
P00167	CYB5A	-0.405711	-0.613644	-0.509677	0.147031	6	6	6	56	56	56	15.33	0	87.826	1896100000	865560000	1030500000	1	4	3	4	P00167	Cytochrome b5
Q2M2I8	AAK1	1.96966		1.96966	#DIV/0!	19	17	17	28.4	26.4	26.4	103.88	0	104.86	721880000	148120000	573770000	12	11	6	3	Q2M2I8	AP2-associated protein kinase 1
O96011	PEX11B	1.78528	1.77464	1.77996	0.00752362	15	15	15	61	61	61	28.431	0	143.31	6940000000	2081200000	4858800000	4	14	8	9	O96011	Peroxisomal membrane protein 11B
P08579	SNRPB2	-0.1796	-0.103925	-0.141763	0.0535103	11	8	8	48	40.4	40.4	25.486	0	138.98	4260400000	2062700000	2197700000	2	8	7	11	P08579	U2 small nuclear ribonucleoprotein B
Q9H845	ACAD9	1.3764	1.46276	1.41958	0.0610657	26	26	26	46.2	46.2	46.2	68.76	0	323.31	22214000000	14457000000	7756600000	6	18	16	17	Q9H845	Acyl-CoA dehydrogenase family member 9, mitochondrial
O95479	H6PD	0.518608	0.354623	0.436615	0.115955	26	26	26	46.8	46.8	46.8	88.892	0	245.97	7718400000	2872000000	4846300000	13	19	12	11	O95479	GDH/6PGL endoplasmic bifunctional protein;Glucose 1-dehydrogenase;6-phosphogluconolactonase
Q9UNP9	PPIE	2.26846	2.24761	2.25804	0.0147432	15	15	14	51.2	51.2	48.8	33.43	0	148.97	5153800000	1015800000	4138000000	2	9	11	5	Q9UNP9	Peptidyl-prolyl cis-trans isomerase E
Q8TDP1	RNASEH2C	0.41446	0.663484	0.538972	0.176087	11	11	11	87.8	87.8	87.8	17.84	0	181.53	5404300000	2242400000	3161900000	7	9	8	7	Q8TDP1	Ribonuclease H2 subunit C
P55010	EIF5	-0.0424882	0.01453	-0.0139791	0.040318	15	15	15	39	39	39	49.222	0	86.361	5448700000	2237300000	3211400000	4	9	11	6	P55010	Eukaryotic translation initiation factor 5
O15116	LSM1	-1.27148	-0.961289	-1.11638	0.219338	7	7	7	59.4	59.4	59.4	15.179	0	307.89	5831100000	3673800000	2157300000	6	5	4	7	O15116	U6 snRNA-associated Sm-like protein LSm1
Q14232	EIF2B1	-0.0915285	-0.159931	-0.12573	0.0483679	15	15	15	51.5	51.5	51.5	33.712	0	169.05	5314400000	2538000000	2776400000	5	12	11	8	Q14232	Translation initiation factor eIF-2B subunit alpha
Q68DK2	ZFYVE26	-0.352645	-0.586609	-0.469627	0.165438	19	19	19	10.6	10.6	10.6	284.57	0	29.14	333330000	141920000	191410000	2	8	13	3	Q68DK2	Zinc finger FYVE domain-containing protein 26
O15013	ARHGEF10	-1.13594	-0.497746	-0.816844	0.451271	13	13	12	13.1	13.1	12.5	151.61	0	18.905	275700000	189970000	85733000	11	4	3	3	O15013	Rho guanine nucleotide exchange factor 10
Q02790	FKBP4	0.10543	0.354325	0.229877	0.175995	28	28	28	63	63	63	51.804	0	323.31	22030000000	7210300000	14820000000	9	26	14	12	Q02790	Peptidyl-prolyl cis-trans isomerase FKBP4;Peptidyl-prolyl cis-trans isomerase FKBP4, N-terminally processed
O43175	PHGDH	0.842131	0.802499	0.822315	0.0280241	23	23	23	51.6	51.6	51.6	56.65	0	323.31	27932000000	8770600000	19161000000	13	20	16	16	O43175	D-3-phosphoglycerate dehydrogenase
P17066;P48741	HSPA6;HSPA7	0.496662	0.425223	0.460943	0.050515	12	1	1	16.3	1.7	1.7	71.027	0	10.092	2376300000	895160000	1481200000	9	12	10	8	P17066;P48741	Heat shock 70 kDa protein 6;Putative heat shock 70 kDa protein 7
P05141	SLC25A5	0.876951	0.649818	0.763385	0.160607	23	23	10	62.1	62.1	39.3	32.852	0	323.31	258990000000	77970000000	181020000000	21	22	21	19	P05141;Q9H0C2	ADP/ATP translocase 2;ADP/ATP translocase 2, N-terminally processed
Q9H2G2	SLK	-0.266311	-0.340284	-0.303297	0.0523068	38	38	36	40.2	40.2	38.6	142.69	0	323.31	6319300000	3319500000	2999800000	32	22	24	23	Q9H2G2	STE20-like serine/threonine-protein kinase
Q96NB2	SFXN2	3.93757		3.93757	#DIV/0!	6	6	6	20.2	20.2	20.2	36.231	0	18.798	794360000	96325000	698030000	2	5	3	0	Q96NB2	Sideroflexin-2
Q16563	SYPL1	1.17227	-0.695393	0.238437	1.32064	3	3	3	19.7	19.7	19.7	28.565	0	18.633	4198900000	897020000	3301900000	1	3	3	2	Q16563	Synaptophysin-like protein 1
Q9UMX5	NENF	0.396343	0.612733	0.504538	0.153011	7	7	7	57	57	57	18.856	0	44.709	1110000000	411170000	698830000	4	3	6	2	Q9UMX5	Neudesin
Q8WUM4	PDCD6IP	1.15966	0.857006	1.00833	0.214009	52	52	52	65.3	65.3	65.3	96.022	0	323.31	45834000000	15003000000	30831000000	29	49	17	21	Q8WUM4	Programmed cell death 6-interacting protein
P48637	GSS	0.673328	0.624047	0.648688	0.0348469	19	19	19	51.1	51.1	51.1	52.384	0	323.31	6169600000	2183500000	3986200000	10	13	13	10	P48637	Glutathione synthetase
Q8NBX0	SCCPDH	-0.222077	-0.527487	-0.374782	0.215957	10	10	10	42.9	42.9	42.9	47.151	0	323.31	5592000000	2493600000	3098300000	5	6	9	4	Q8NBX0	Saccharopine dehydrogenase-like oxidoreductase
P61201	COPS2	0.392053	0.102054	0.247053	0.20506	16	16	16	40	40	40	51.596	0	145.34	3781200000	1376400000	2404800000	5	13	11	2	P61201	COP9 signalosome complex subunit 2
Q8N2U0	TMEM256	-0.859252	-0.909866	-0.884559	0.0357895	6	6	6	51.3	51.3	51.3	11.741	0	129.45	3386000000	1737500000	1648500000	3	4	5	4	Q8N2U0	Transmembrane protein 256
Q14697	GANAB	0.315013	0.209586	0.2623	0.0745481	64	64	64	72.1	72.1	72.1	106.87	0	323.31	295940000000	109610000000	186320000000	50	62	49	44	Q14697	Neutral alpha-glucosidase AB
P40939	HADHA	0.41673	0.335438	0.376084	0.0574821	42	42	42	67.5	67.5	67.5	82.999	0	323.31	44366000000	17789000000	26577000000	21	36	30	26	P40939	Trifunctional enzyme subunit alpha, mitochondrial;Long-chain enoyl-CoA hydratase;Long chain 3-hydroxyacyl-CoA dehydrogenase
O15258	RER1	1.08292	0.974733	1.02883	0.0764998	8	8	8	41.3	41.3	41.3	22.958	0	121.54	6289200000	1997700000	4291600000	6	8	6	5	O15258	Protein RER1
Q9BWD1	ACAT2	-0.465212	-0.621817	-0.543515	0.110736	14	14	14	61.5	61.5	61.5	41.35	0	323.31	17889000000	6468100000	11421000000	10	8	10	10	Q9BWD1	Acetyl-CoA acetyltransferase, cytosolic
Q13595	TRA2A	-0.811102		-0.811102	#DIV/0!	3	3	3	13.1	13.1	13.1	32.688	0	33.574	934660000	517020000	417640000	2	1	3	2	Q13595	Transformer-2 protein homolog alpha
Q8NDX5	PHC3				#DIV/0!	5	5	4	9.2	9.2	7.8	106.16	0	16.288	180030000	87738000	92290000	4	3	2	1	Q8NDX5	Polyhomeotic-like protein 3
Q92945	KHSRP	0.143801	0.134713	0.139257	0.00642619	36	36	33	65.4	65.4	62.2	73.114	0	323.31	35375000000	13346000000	22029000000	21	29	15	19	Q92945	Far upstream element-binding protein 2
P23786	CPT2	0.50444	0.481249	0.492844	0.0163985	22	22	22	43.2	43.2	43.2	73.776	0	256.23	7459500000	2930200000	4529300000	15	17	14	15	P23786	Carnitine O-palmitoyltransferase 2, mitochondrial
Q5VW32	BROX	0.27228	0.400331	0.336306	0.0905457	8	8	8	21.9	21.9	21.9	46.476	0	146.82	2864400000	958250000	1906100000	3	8	5	1	Q5VW32	BRO1 domain-containing protein BROX
Q9BWM7	SFXN3	1.73411	1.55336	1.64373	0.12781	14	14	13	55.5	55.5	49.5	35.503	0	200.03	16682000000	4195600000	12487000000	5	12	11	7	Q9BWM7	Sideroflexin-3
Q9Y5Z4	HEBP2	-0.130859	0.119537	-0.00566093	0.177057	8	8	8	54.1	54.1	54.1	22.875	0	129.71	2999600000	1343400000	1656200000	3	2	8	4	Q9Y5Z4	Heme-binding protein 2
Q96JJ7	TMX3	1.06539	0.239401	0.652397	0.584062	8	8	8	21.1	21.1	21.1	51.871	0	108.4	2301900000	827280000	1474700000	4	7	6	1	Q96JJ7	Protein disulfide-isomerase TMX3
Q5W0V3	FAM160B1	0.321101		0.321101	#DIV/0!	7	7	6	11.2	11.2	10.1	86.557	0	27.81	377120000	171750000	205370000	4	4	2	3	Q5W0V3	Protein FAM160B1
Q9HC07	TMEM165	0.192882	0.118369	0.155626	0.0526886	6	6	6	30.9	30.9	30.9	34.905	0	84.255	1231600000	425940000	805650000	5	6	3	3	Q9HC07	Transmembrane protein 165
Q15631	TSN	0.810563	0.861625	0.836094	0.0361063	16	16	16	50	50	50	26.183	0	323.31	28576000000	9027300000	19548000000	5	14	13	15	Q15631	Translin
Q9UJ83	HACL1	3.07778	2.12461	2.6012	0.673993	10	10	10	26	26	26	63.728	0	80.996	1180600000	278560000	902080000	5	7	5	4	Q9UJ83	2-hydroxyacyl-CoA lyase 1
Q9Y223	GNE	2.42101	1.65145	2.03623	0.544161	14	14	14	24	24	24	79.274	0	42.507	959520000	225450000	734070000	5	11	4	3	Q9Y223	Bifunctional UDP-N-acetylglucosamine 2-epimerase/N-acetylmannosamine kinase;UDP-N-acetylglucosamine 2-epimerase (hydrolyzing);N-acetylmannosamine kinase
Q99613;B5ME19	EIF3C;EIF3CL	0.122408	0.493218	0.307813	0.262202	40	40	40	45.6	45.6	45.6	105.34	0	323.31	32341000000	12516000000	19825000000	26	36	20	30	Q99613;B5ME19	Eukaryotic translation initiation factor 3 subunit C;Eukaryotic translation initiation factor 3 subunit C-like protein
P11279	LAMP1	1.43429	1.11038	1.27234	0.229039	6	6	6	15.3	15.3	15.3	44.882	0	105.92	9526000000	2970900000	6555100000	6	6	5	6	P11279	Lysosome-associated membrane glycoprotein 1
Q6UW63	KDELC1				#DIV/0!	2	2	2	6	6	6	58.042	0.0037429	1.7469	954250000	82323000	871930000	0	1	2	0	Q6UW63	KDEL motif-containing protein 1
Q9Y5K8	ATP6V1D	0.721485	0.581963	0.651724	0.098657	12	12	12	44.1	44.1	44.1	28.262	0	220.28	3576200000	1138600000	2437600000	6	7	8	5	Q9Y5K8	V-type proton ATPase subunit D
P33992	MCM5	0.987151	0.954713	0.970932	0.0229371	53	53	53	64.6	64.6	64.6	82.285	0	323.31	48606000000	19250000000	29355000000	31	37	41	36	P33992	DNA replication licensing factor MCM5
Q9GZY8	MFF	0.667849	-1.58557	-0.458858	1.59341	8	8	8	28.1	28.1	28.1	38.464	0	73.292	1276700000	499930000	776790000	4	6	5	2	Q9GZY8	Mitochondrial fission factor
P47897	QARS	0.361557	0.226896	0.294226	0.0952197	46	45	45	60.6	60.6	60.6	87.798	0	323.31	17276000000	6819600000	10457000000	19	36	21	22	P47897	Glutamine--tRNA ligase
Q15283	RASA2	0.998288	0.412032	0.70516	0.414546	7	7	7	13.6	13.6	13.6	96.613	0	21.639	273090000	82217000	190870000	5	3	2	3	Q15283	Ras GTPase-activating protein 2
Q9Y6Y8	SEC23IP	1.13356	1.16889	1.15123	0.0249821	32	32	32	37.1	37.1	37.1	111.08	0	310.6	8077600000	3038000000	5039600000	21	20	20	22	Q9Y6Y8	SEC23-interacting protein
Q9NUU6	FAM105A	3.35628		3.35628	#DIV/0!	12	12	12	40.7	40.7	40.7	42.195	0	91.684	584910000	49962000	534950000	6	6	4	3	Q9NUU6	Inactive ubiquitin thioesterase FAM105A
Q96LR5	UBE2E2	0.390671	0.10247	0.246571	0.203789	6	6	1	34.8	34.8	7.5	22.255	0	59.028	1085500000	384370000	701090000	2	5	3	2	Q96LR5	Ubiquitin-conjugating enzyme E2 E2
Q14566	MCM6	1.26154	0.894028	1.07778	0.25987	46	46	46	54	54	54	92.888	0	323.31	39869000000	15162000000	24706000000	30	34	26	23	Q14566	DNA replication licensing factor MCM6
Q9UL18	AGO1	-0.98516		-0.98516	#DIV/0!	12	9	8	20.3	16.3	15.1	97.213	0	22.321	280510000	150630000	129880000	8	6	5	3	Q9UL18;Q9HCK5	Protein argonaute-1
O75907	DGAT1	-0.930332		-0.930332	#DIV/0!	5	5	5	17.4	17.4	17.4	55.278	0	36.62	251730000	173790000	77947000	4	2	5	1	O75907	Diacylglycerol O-acyltransferase 1
Q9NVS2	MRPS18A	-0.468027	-0.318355	-0.393191	0.105834	9	9	9	44.9	44.9	44.9	22.184	0	38.108	2077400000	1257300000	820130000	2	3	8	7	Q9NVS2	28S ribosomal protein S18a, mitochondrial
P32942	ICAM3	0.872782	-2.26608	-0.696651	2.21951	10	10	10	22.1	22.1	22.1	59.54	0	50.83	3165100000	1688500000	1476500000	7	9	5	9	P32942	Intercellular adhesion molecule 3
Q9HCE0	EPG5	-0.35953	-0.578814	-0.469172	0.155057	20	20	20	10.4	10.4	10.4	292.48	0	27.601	342470000	179430000	163040000	8	16	7	2	Q9HCE0	Ectopic P granules protein 5 homolog
Q9UNS2	COPS3	0.544353	0.168909	0.356631	0.265479	16	16	16	58.4	58.4	58.4	47.873	0	323.31	3551900000	1372800000	2179100000	7	10	11	5	Q9UNS2	COP9 signalosome complex subunit 3
P38435	GGCX				#DIV/0!	9	9	9	13.2	13.2	13.2	87.56	0	34.488	516120000	50372000	465750000	6	9	1	1	P38435	Vitamin K-dependent gamma-carboxylase
Q9UHB6	LIMA1	1.8572		1.8572	#DIV/0!	7	7	7	13.6	13.6	13.6	85.225	0	16.695	256990000	78541000	178450000	6	4	2	1	Q9UHB6	LIM domain and actin-binding protein 1
P12081	HARS	0.277865	0.806703	0.542284	0.373945	21	21	15	43	43	31.6	57.41	0	198.73	6627500000	2181400000	4446100000	9	15	7	7	P12081	Histidine--tRNA ligase, cytoplasmic
Q9NUQ9	FAM49B	-0.169727	-0.0617054	-0.115716	0.0763828	19	19	17	73.5	73.5	66.7	36.748	0	323.31	32948000000	13788000000	19161000000	8	15	19	13	Q9NUQ9	Protein FAM49B
Q86VP6	CAND1	0.10358	0.246732	0.175156	0.101224	68	68	65	59.1	59.1	56.7	136.37	0	323.31	92909000000	37330000000	55579000000	53	55	46	54	Q86VP6	Cullin-associated NEDD8-dissociated protein 1
Q96A72	MAGOHB	0.38421	0.333327	0.358768	0.0359797	13	13	1	77	77	6.1	17.276	0	323.31	12565000000	5589800000	6975000000	8	11	8	9	Q96A72	Protein mago nashi homolog 2
P55809	OXCT1	1.16279	1.44801	1.3054	0.201681	11	11	11	34.8	34.8	34.8	56.157	0	323.31	7859500000	1789300000	6070100000	5	10	7	8	P55809;Q9BYC2	Succinyl-CoA:3-ketoacid coenzyme A transferase 1, mitochondrial
Q96AG4	LRRC59	0.0958478	0.224319	0.160083	0.0908429	17	17	17	49.8	49.8	49.8	34.93	0	323.31	46282000000	17554000000	28728000000	10	15	16	13	Q96AG4	Leucine-rich repeat-containing protein 59
Q5JSP0	FGD3	-0.487621		-0.487621	#DIV/0!	4	4	4	7.9	7.9	7.9	79.4	0	61.962	323070000	180070000	143000000	3	1	3	1	Q5JSP0	FYVE, RhoGEF and PH domain-containing protein 3
Q96II8	LRCH3	0.487688	0.530896	0.509292	0.0305527	9	9	8	16.5	16.5	15.2	86.082	0	20.483	465620000	216960000	248670000	5	3	2	4	Q96II8	Leucine-rich repeat and calponin homology domain-containing protein 3
Q9BYP7	WNK3				#DIV/0!	7	2	1	3.7	1.1	0.5	198.41	0.00083921	2.2673	55369000	19274000	36096000	7	3	2	1	Q9BYP7	Serine/threonine-protein kinase WNK3
P0DP25;P0DP24;P0DP23		0.18665	0.346107	0.266379	0.112753	12	12	11	85.2	85.2	80.5	16.837	0	323.31	26193000000	10834000000	15360000000	7	8	10	8	P0DP25;P0DP24;P0DP23;P27482
O15371	EIF3D	0.254751	0.0984064	0.176579	0.110552	21	21	21	56.9	56.9	56.9	63.972	0	323.31	17481000000	7380900000	10101000000	12	18	11	17	O15371	Eukaryotic translation initiation factor 3 subunit D
P84098	RPL19	0.067832	-0.0020162	0.0329079	0.0493901	9	9	9	30.6	30.6	30.6	23.466	0	103.17	12997000000	6485900000	6510700000	5	6	6	9	P84098	60S ribosomal protein L19
Q9Y2Q5	LAMTOR2	-0.956164	-1.14353	-1.04985	0.132488	8	8	8	90.4	90.4	90.4	13.507	0	141.89	4596800000	2636800000	1960000000	3	5	8	7	Q9Y2Q5	Ragulator complex protein LAMTOR2
P30084	ECHS1	0.976379	0.916594	0.946486	0.0422744	18	18	18	65.5	65.5	65.5	31.387	0	312.5	19024000000	5840300000	13183000000	7	13	15	15	P30084	Enoyl-CoA hydratase, mitochondrial
Q12931	TRAP1	0.586925	0.635033	0.610979	0.0340175	31	31	31	47.2	47.2	47.2	80.109	0	323.31	25461000000	9328100000	16133000000	19	24	16	21	Q12931	Heat shock protein 75 kDa, mitochondrial
Q13488	TCIRG1				#DIV/0!	7	7	7	11.7	11.7	11.7	92.967	0	14.435	180240000	22096000	158150000	4	5	1	0	Q13488	V-type proton ATPase 116 kDa subunit a isoform 3
Q14699	RFTN1				#DIV/0!	2	2	2	4.5	4.5	4.5	63.145	0	28.292	105990000	56105000	49886000	2	0	1	0	Q14699	Raftlin
Q15738	NSDHL	-0.0178654	-0.12997	-0.0739176	0.0792699	11	11	11	43.7	43.7	43.7	41.9	0	234.25	3152200000	826770000	2325400000	4	7	7	5	Q15738	Sterol-4-alpha-carboxylate 3-dehydrogenase, decarboxylating
P33993	MCM7	0.741002	0.817676	0.779339	0.0542167	38	38	38	55.4	55.4	55.4	81.307	0	323.31	62366000000	25143000000	37222000000	23	33	22	25	P33993	DNA replication licensing factor MCM7
P29144	TPP2	0.551779	0.524855	0.538317	0.0190381	80	80	80	67.3	67.3	67.3	138.35	0	323.31	86530000000	33352000000	53178000000	65	65	56	63	P29144	Tripeptidyl-peptidase 2
Q92973	TNPO1	0.507168	0.495547	0.501357	0.00821729	27	27	22	42.7	42.7	35.2	102.35	0	323.31	27152000000	11719000000	15433000000	21	21	21	17	Q92973	Transportin-1
Q14353	GAMT	1.57668	1.27741	1.42704	0.211616	10	10	10	77.1	77.1	77.1	26.318	0	160.88	1953400000	513740000	1439600000	4	7	5	10	Q14353	Guanidinoacetate N-methyltransferase
Q9NWW5	CLN6	0.743254	0.78166	0.762457	0.0271571	5	5	5	18.3	18.3	18.3	35.919	0	76.501	3043100000	933120000	2110000000	5	5	5	3	Q9NWW5	Ceroid-lipofuscinosis neuronal protein 6
Q8NBK3	SUMF1				#DIV/0!	2	2	2	7.8	7.8	7.8	40.556	0	24.226	121450000	17567000	103890000	1	2	0	0	Q8NBK3	Sulfatase-modifying factor 1
Q8WTV0	SCARB1	2.19214		2.19214	#DIV/0!	5	5	5	10.3	10.3	10.3	60.877	0	14.838	550530000	121660000	428870000	3	4	1	1	Q8WTV0	Scavenger receptor class B member 1
Q9Y6E2	BZW2	-0.0570408	0.155759	0.0493589	0.150472	14	12	12	30.8	27.4	27.4	48.162	0	41.1	5739900000	2757800000	2982100000	3	7	12	4	Q9Y6E2	Basic leucine zipper and W2 domain-containing protein 2
Q96M27	PRRC1	0.92598	1.49973	1.21285	0.405703	4	4	4	11.5	11.5	11.5	46.701	0	22.259	1776900000	390240000	1386600000	1	4	2	2	Q96M27	Protein PRRC1
Q99614	TTC1	0.55038	1.20419	0.877285	0.462313	11	11	11	44.2	44.2	44.2	33.526	0	103.78	1795900000	592980000	1202900000	2	10	3	3	Q99614	Tetratricopeptide repeat protein 1
P07602	PSAP	0.799466	0.645197	0.722331	0.109085	23	23	23	44.5	44.5	44.5	58.112	0	54.441	14359000000	5217800000	9141200000	6	21	13	19	P07602	Prosaposin;Saposin-A;Saposin-B-Val;Saposin-B;Saposin-C;Saposin-D
Q13541	EIF4EBP1	-0.677144		-0.677144	#DIV/0!	4	4	4	59.3	59.3	59.3	12.58	0	41.619	956970000	641030000	315940000	3	0	4	1	Q13541	Eukaryotic translation initiation factor 4E-binding protein 1
Q9P015	MRPL15	-0.319452	-0.424626	-0.372039	0.0743692	15	15	15	49	49	49	33.419	0	86.259	3073200000	1858400000	1214800000	8	6	12	7	Q9P015	39S ribosomal protein L15, mitochondrial
P05455	SSB	-0.261726	-0.250011	-0.255869	0.00828376	37	37	37	63	63	63	46.836	0	323.31	40548000000	20759000000	19789000000	17	25	32	24	P05455	Lupus La protein
Q6P2Q9	PRPF8	0.0509014	-0.0182697	0.0163159	0.0489114	140	140	140	62.8	62.8	62.8	273.6	0	323.31	128590000000	64785000000	63810000000	120	123	119	114	Q6P2Q9	Pre-mRNA-processing-splicing factor 8
Q969M3	YIPF5		1.18992	1.18992	#DIV/0!	2	2	2	8.2	8.2	8.2	27.989	0	3.794	138440000	23937000	114500000	1	2	1	1	Q969M3	Protein YIPF5
P48643	CCT5	0.471797	0.433486	0.452641	0.02709	41	41	41	74.5	74.5	74.5	59.67	0	323.31	101200000000	32173000000	69030000000	20	39	27	26	P48643	T-complex protein 1 subunit epsilon
P78417	GSTO1	-0.923553	-0.971169	-0.947361	0.0336696	21	21	21	66.4	66.4	66.4	27.566	0	323.31	44083000000	24534000000	19549000000	7	14	20	16	P78417	Glutathione S-transferase omega-1
Q14240	EIF4A2	1.07232	0.94001	1.00617	0.0935573	27	13	13	73.7	44	44	46.402	0	266.28	9054800000	2909000000	6145800000	15	17	26	14	Q14240	Eukaryotic initiation factor 4A-II;Eukaryotic initiation factor 4A-II, N-terminally processed
O60488	ACSL4	-0.473645	-0.425244	-0.449444	0.0342247	32	32	30	56.7	56.7	52.6	79.187	0	323.31	22506000000	11280000000	11226000000	18	25	28	17	O60488	Long-chain-fatty-acid--CoA ligase 4
P09972	ALDOC	-0.713583	-0.809476	-0.761529	0.0678066	26	20	20	74.5	60.4	60.4	39.455	0	323.31	43315000000	13431000000	29884000000	14	23	17	7	P09972	Fructose-bisphosphate aldolase C
P14678;P63162	SNRPB;SNRPN	-0.281757	0.0726121	-0.104572	0.250577	12	12	12	41.2	41.2	41.2	24.61	0	33.53	21114000000	9961300000	11153000000	4	10	11	8	P14678;P63162	Small nuclear ribonucleoprotein-associated proteins B and B;Small nuclear ribonucleoprotein-associated protein N
Q9H9P8	L2HGDH	0.252423		0.252423	#DIV/0!	8	8	8	21.4	21.4	21.4	50.315	0	19.486	565950000	287790000	278160000	2	1	7	1	Q9H9P8	L-2-hydroxyglutarate dehydrogenase, mitochondrial
Q9BRX5	GINS3	0.751985	0.71537	0.733677	0.0258907	9	9	9	56	56	56	24.534	0	201.88	1663700000	554090000	1109600000	2	5	5	5	Q9BRX5	DNA replication complex GINS protein PSF3
P25788	PSMA3	0.321261	0.479453	0.400357	0.111859	15	15	15	60	60	60	28.433	0	193.76	20784000000	9282300000	11502000000	5	11	11	9	P25788	Proteasome subunit alpha type-3
P29466	CASP1	1.97253	3.91776	2.94515	1.37549	6	6	5	23	23	20.8	45.158	0	21.748	1172100000	376310000	795770000	2	4	3	3	P29466	Caspase-1;Caspase-1 subunit p20;Caspase-1 subunit p10
P84095	RHOG	-0.451073	-0.0934479	-0.272261	0.252879	13	13	12	69.6	69.6	63.9	21.308	0	251.79	14112000000	6463200000	7648400000	4	11	6	12	P84095	Rho-related GTP-binding protein RhoG
Q15526	SURF1	-1.2861	-0.273471	-0.779784	0.716037	4	4	4	28.3	28.3	28.3	33.331	0	40.611	438350000	161210000	277140000	4	3	2	2	Q15526	Surfeit locus protein 1
O96000	NDUFB10	0.680087	0.162263	0.421175	0.366157	7	7	7	43.6	43.6	43.6	20.776	0	67.717	8619500000	3324800000	5294800000	3	5	3	7	O96000	NADH dehydrogenase [ubiquinone] 1 beta subcomplex subunit 10
Q8N806	UBR7	0.223554	0.425366	0.32446	0.142703	8	8	8	25.6	25.6	25.6	47.998	0	41.576	699140000	312180000	386960000	3	5	6	4	Q8N806	Putative E3 ubiquitin-protein ligase UBR7
Q9NTX5	ECHDC1	0.295647	0.601983	0.448815	0.216612	12	12	12	51.8	51.8	51.8	33.698	0	278.71	7696000000	2641500000	5054500000	4	10	10	9	Q9NTX5	Ethylmalonyl-CoA decarboxylase
Q13395	TARBP1	0.991809	0.931084	0.961447	0.0429391	28	28	28	25	25	25	181.67	0	129.53	1939400000	642750000	1296600000	14	17	18	13	Q13395	Probable methyltransferase TARBP1
Q9BTZ2	DHRS4	0.992134	1.12703	1.05958	0.0953859	9	9	9	39.6	39.6	39.6	29.537	0	136.28	1790500000	611320000	1179200000	2	7	6	5	Q9BTZ2;Q6PKH6;P0CG22	Dehydrogenase/reductase SDR family member 4
P52907	CAPZA1	0.312283	0.217374	0.264828	0.0671108	17	17	13	76.9	76.9	62.6	32.922	0	323.31	36634000000	12483000000	24151000000	8	8	16	10	P52907	F-actin-capping protein subunit alpha-1
P20645	M6PR	2.274	1.32577	1.79988	0.6705	7	7	7	35	35	35	30.993	0	161.77	4554300000	915680000	3638600000	1	6	3	3	P20645	Cation-dependent mannose-6-phosphate receptor
O95249	GOSR1	2.92077	3.20065	3.06071	0.197905	7	7	7	32.4	32.4	32.4	28.612	0	35.223	1398900000	235680000	1163200000	1	5	7	6	O95249	Golgi SNAP receptor complex member 1
O00203	AP3B1	0.352788	0.410592	0.38169	0.0408736	42	42	33	42.1	42.1	35.1	121.32	0	323.31	12257000000	5687300000	6570100000	29	31	27	26	O00203	AP-3 complex subunit beta-1
P26641	EEF1G	-0.191315	0.0408395	-0.0752376	0.164158	31	31	31	68.9	68.9	68.9	50.118	0	323.31	53108000000	23572000000	29536000000	18	21	22	23	P26641	Elongation factor 1-gamma
Q96GD0	PDXP	0.270634	0.246573	0.258604	0.0170137	14	11	11	59.5	42.6	42.6	31.698	0	96.678	2091400000	721960000	1369500000	5	10	9	4	Q96GD0	Pyridoxal phosphate phosphatase
P10109	FDX1	0.25525	-0.127404	0.063923	0.270577	4	4	4	28.8	28.8	28.8	19.393	0	11.836	335720000	154630000	181090000	1	3	2	2	P10109	Adrenodoxin, mitochondrial
Q9NVA1	UQCC1	-0.272239	-0.165078	-0.218659	0.0757743	8	8	8	35.8	35.8	35.8	34.6	0	211.95	2580500000	909250000	1671300000	3	7	3	6	Q9NVA1	Ubiquinol-cytochrome-c reductase complex assembly factor 1
Q9NYF8	BCLAF1	-1.23529	-1.00191	-1.1186	0.165025	25	24	24	30.5	30.5	30.5	106.12	0	323.31	9543700000	6427200000	3116500000	16	15	14	21	Q9NYF8	Bcl-2-associated transcription factor 1
Q9NZZ3	CHMP5	0.36265	1.09395	0.728298	0.517107	4	4	4	33.3	33.3	33.3	24.57	0	104.39	584080000	212330000	371740000	3	1	3	2	Q9NZZ3	Charged multivesicular body protein 5
Q15393	SF3B3	0.17424	0.134866	0.154553	0.0278416	56	56	56	55.5	55.5	55.5	135.58	0	323.31	119760000000	53877000000	65879000000	52	54	50	52	Q15393	Splicing factor 3B subunit 3
P51798	CLCN7	2.0228		2.0228	#DIV/0!	8	8	8	12.3	12.3	12.3	88.678	0	6.6721	269720000	93065000	176660000	3	5	2	0	P51798	H(+)/Cl(-) exchange transporter 7
Q99661	KIF2C	0.683197		0.683197	#DIV/0!	12	11	11	19.3	18.1	18.1	81.312	0	52.328	1137400000	296370000	841080000	7	7	4	1	Q99661;Q8N4N8	Kinesin-like protein KIF2C
P19623	SRM	0.67515	0.758688	0.716919	0.0590703	21	21	21	81.8	81.8	81.8	33.824	0	323.31	23183000000	7965100000	15218000000	11	14	19	13	P19623	Spermidine synthase
P49792	RANBP2	0.866974	1.16533	1.01615	0.21097	159	159	103	64.2	64.2	43.3	358.2	0	323.31	31083000000	14509000000	16574000000	131	118	104	113	P49792	E3 SUMO-protein ligase RanBP2
P11413	G6PD	1.49571	1.35016	1.42293	0.102919	31	31	31	68.2	68.2	68.2	59.256	0	323.31	24524000000	6749400000	17775000000	15	21	23	17	P11413	Glucose-6-phosphate 1-dehydrogenase
Q9UHY1	NRBP1	0.258404	-0.0700156	0.0941944	0.232228	9	9	9	25.6	25.6	25.6	59.844	0	201.06	2661900000	1170000000	1491800000	6	7	6	4	Q9UHY1	Nuclear receptor-binding protein
P12074	COX6A1	-0.267127	-0.742743	-0.504935	0.336311	2	2	2	43.1	43.1	43.1	12.155	0	28.341	3557700000	1725300000	1832400000	2	1	2	1	P12074	Cytochrome c oxidase subunit 6A1, mitochondrial
P78346	RPP30	0.812245	0.783962	0.798104	0.0199991	12	12	12	50.7	50.7	50.7	29.321	0	216.93	5592100000	2028000000	3564100000	7	12	9	11	P78346	Ribonuclease P protein subunit p30
P41226	UBA7	3.25285	2.82588	3.03937	0.301913	25	25	25	39	39	39	111.69	0	323.31	2453500000	206040000	2247500000	15	21	11	8	P41226	Ubiquitin-like modifier-activating enzyme 7
Q9Y217	MTMR6	-0.0649134	-0.451879	-0.258396	0.273626	16	16	16	35.4	35.4	35.4	71.967	0	118.74	1728700000	958970000	769770000	8	7	9	9	Q9Y217	Myotubularin-related protein 6
Q09161	NCBP1	0.892495	0.917019	0.904757	0.0173411	26	26	26	53	53	53	91.838	0	277.14	11677000000	4505900000	7171300000	14	20	16	20	Q09161	Nuclear cap-binding protein subunit 1
P31937	HIBADH	0.622305	0.59452	0.608412	0.019647	11	11	11	40.2	40.2	40.2	35.329	0	286.97	3644000000	1025400000	2618500000	5	6	8	5	P31937	3-hydroxyisobutyrate dehydrogenase, mitochondrial
Q92538	GBF1	1.15031	0.679613	0.914963	0.332833	61	61	61	44.2	44.2	44.2	206.44	0	323.31	8650800000	2746000000	5904800000	40	47	39	32	Q92538	Golgi-specific brefeldin A-resistance guanine nucleotide exchange factor 1
Q9P107	GMIP	0.503433	0.89747	0.700451	0.278626	23	23	23	29.6	29.6	29.6	106.68	0	143.02	1421300000	485200000	936060000	15	13	7	4	Q9P107	GEM-interacting protein
Q96Q11	TRNT1	0.427585	0.358641	0.393113	0.0487508	11	11	11	26.3	26.3	26.3	50.127	0	54.045	2898600000	1132000000	1766500000	7	8	7	5	Q96Q11	CCA tRNA nucleotidyltransferase 1, mitochondrial
Q9UFW8	CGGBP1	0.732341	0.513383	0.622862	0.154827	10	10	10	47.9	47.9	47.9	18.82	0	96.499	1376000000	451720000	924260000	2	6	5	7	Q9UFW8	CGG triplet repeat-binding protein 1
Q9BWS9	CHID1	0.260228	0.390444	0.325336	0.0920766	18	18	18	47.3	47.3	47.3	44.94	0	119.54	9492700000	3126300000	6366400000	10	13	10	11	Q9BWS9	Chitinase domain-containing protein 1
P57737	CORO7	0.602196	0.404096	0.503146	0.140078	24	24	24	38.7	38.7	38.7	100.6	0	323.31	8781800000	3762300000	5019600000	13	18	13	9	P57737	Coronin-7
O75935	DCTN3	-0.17572	0.341908	0.083094	0.366018	7	7	7	38.7	38.7	38.7	21.119	0	28.64	1158900000	395010000	763910000	0	4	3	5	O75935	Dynactin subunit 3
P08670	VIM	-0.519446	-0.528038	-0.523742	0.00607546	44	43	40	83.5	82	78.1	53.651	0	323.31	57005000000	26677000000	30328000000	21	33	35	35	P08670;P17661;P41219	Vimentin
Q15181	PPA1	0.508172	0.478485	0.493329	0.0209919	22	22	22	81.7	81.7	81.7	32.66	0	323.31	41845000000	15017000000	26829000000	7	18	15	14	Q15181	Inorganic pyrophosphatase
P43897	TSFM	0.536896	0.588577	0.562736	0.036544	7	7	7	34.8	34.8	34.8	35.39	0	104.44	1520700000	640990000	879690000	2	3	5	4	P43897	Elongation factor Ts, mitochondrial
O43292	GPAA1	1.68866	2.05689	1.87278	0.260378	11	11	11	18.8	18.8	18.8	67.622	0	39.303	1275000000	259970000	1015000000	3	11	5	4	O43292	Glycosylphosphatidylinositol anchor attachment 1 protein
O00217	NDUFS8	0.00262992	0.0184392	0.0105346	0.0111788	9	9	9	47.1	47.1	47.1	23.705	0	94.794	6253700000	2913000000	3340700000	3	8	5	8	O00217	NADH dehydrogenase [ubiquinone] iron-sulfur protein 8, mitochondrial
Q92572	AP3S1	0.487833	0.240519	0.364176	0.174877	10	10	10	44.6	44.6	44.6	21.732	0	136.88	2661100000	1034200000	1626900000	4	9	7	8	Q92572	AP-3 complex subunit sigma-1
Q15121	PEA15	0.207911	0.0397049	0.123808	0.11894	7	7	7	60	60	60	15.04	0	141.49	1910700000	847070000	1063700000	3	5	6	4	Q15121	Astrocytic phosphoprotein PEA-15
O60220	TIMM8A	0.228624	0.117321	0.172973	0.0787031	4	4	4	63.9	63.9	63.9	10.998	0	64.405	1154600000	536650000	617980000	2	2	3	3	O60220	Mitochondrial import inner membrane translocase subunit Tim8 A
O75381	PEX14	0.277865		0.277865	#DIV/0!	4	4	4	11.7	11.7	11.7	41.236	0	7.7189	395930000	126030000	269900000	1	4	2	1	O75381	Peroxisomal membrane protein PEX14
Q96CN7	ISOC1	-1.76693	-1.50005	-1.63349	0.188713	8	8	8	34.9	34.9	34.9	32.236	0	47.587	2699400000	1613400000	1086000000	3	4	8	2	Q96CN7	Isochorismatase domain-containing protein 1
Q99611	SEPHS2	-1.0191		-1.0191	#DIV/0!	3	3	3	10.3	10.3	10.3	47.305	0	5.2957	353610000	172520000	181090000	2	2	3	1	Q99611	Selenide, water dikinase 2
P20338	RAB4A	0.00843407	-0.631865	-0.311716	0.45276	12	12	10	59.6	59.6	53.2	24.389	0	74.282	2556600000	945950000	1610600000	3	6	8	7	P20338	Ras-related protein Rab-4A
Q15005	SPCS2	0.758937	0.777045	0.767991	0.0128043	13	13	13	47.8	47.8	47.8	25.003	0	186.87	14485000000	4114300000	10370000000	4	11	10	11	Q15005	Signal peptidase complex subunit 2
Q8WTW3	COG1	0.555131	0.673844	0.614487	0.0839428	14	14	14	21.3	21.3	21.3	108.98	0	136.78	988590000	439200000	549390000	10	6	8	3	Q8WTW3	Conserved oligomeric Golgi complex subunit 1
Q13617	CUL2	1.26126	1.18559	1.22343	0.0535068	30	30	30	44.8	44.8	44.8	86.982	0	207.23	8077700000	2205800000	5871900000	13	25	12	14	Q13617	Cullin-2
B0I1T2	MYO1G	0.983894	0.91585	0.949872	0.0481144	44	44	43	57.2	57.2	57.2	116.44	0	323.31	24091000000	8703800000	15387000000	30	33	27	32	B0I1T2	Unconventional myosin-Ig;Minor histocompatibility antigen HA-2
Q7Z6P3	RAB44	0.153138	0.311448	0.232293	0.111942	20	20	20	30.8	30.8	30.8	110.85	0	199.27	1142800000	433170000	709590000	15	13	6	7	Q7Z6P3	Ras-related protein Rab-44
Q9UBV2	SEL1L	1.08866	0.409151	0.748904	0.480485	18	18	18	38.5	38.5	38.5	88.754	0	323.31	4280500000	1191400000	3089100000	8	17	11	7	Q9UBV2	Protein sel-1 homolog 1
O95721	SNAP29	0.294186		0.294186	#DIV/0!	8	8	8	36.8	36.8	36.8	28.97	0	13.208	627730000	229840000	397890000	1	6	5	0	O95721	Synaptosomal-associated protein 29
Q9UPN7	PPP6R1	0.382976	0.428362	0.405669	0.0320927	22	22	22	41.9	41.9	41.9	96.723	0	323.31	6244700000	2461400000	3783200000	18	17	17	11	Q9UPN7	Serine/threonine-protein phosphatase 6 regulatory subunit 1
Q9NRX2	MRPL17	-0.306202	-0.243427	-0.274815	0.0443886	8	8	8	47.4	47.4	47.4	20.05	0	55.274	2213300000	1273600000	939700000	4	3	5	6	Q9NRX2	39S ribosomal protein L17, mitochondrial
O43670	ZNF207	1.22963	0.970522	1.10008	0.183217	7	7	7	17.8	17.8	17.8	50.75	0	31.387	1306700000	331270000	975430000	1	6	3	2	O43670	BUB3-interacting and GLEBS motif-containing protein ZNF207
Q9UHG3	PCYOX1	0.247923	0.633396	0.44066	0.272571	10	10	10	27.9	27.9	27.9	56.639	0	47.638	2528400000	859120000	1669300000	6	8	5	2	Q9UHG3	Prenylcysteine oxidase 1
Q9UIJ7	AK3	0.0807937	0.0942804	0.087537	0.00953654	19	19	19	74.4	74.4	74.4	25.565	0	323.31	8152300000	3826600000	4325700000	4	10	14	16	Q9UIJ7	GTP:AMP phosphotransferase AK3, mitochondrial
Q92621	NUP205	0.364366	-0.0109817	0.176692	0.265411	87	87	87	48.1	48.1	48.1	227.92	0	323.31	34864000000	17085000000	17779000000	65	63	65	65	Q92621	Nuclear pore complex protein Nup205
P62701	RPS4X	0.087861	-0.136914	-0.0245265	0.15894	25	25	14	68.1	68.1	38	29.597	0	259.83	38311000000	19601000000	18709000000	10	15	19	20	P62701	40S ribosomal protein S4, X isoform
P63241;Q6IS14	EIF5A;EIF5AL1	-1.01159	-0.710762	-0.861176	0.212718	19	19	10	91.6	91.6	59.1	16.832	0	323.31	41787000000	23907000000	17880000000	8	15	13	17	P63241;Q6IS14	Eukaryotic translation initiation factor 5A-1;Eukaryotic translation initiation factor 5A-1-like
Q9UJ68	MSRA	2.74801	2.66876	2.70838	0.0560382	5	5	5	29.8	29.8	29.8	26.132	0	81.34	1338600000	192800000	1145800000	1	4	3	3	Q9UJ68	Mitochondrial peptide methionine sulfoxide reductase
P82094	TMF1	1.9551		1.9551	#DIV/0!	22	22	22	24.7	24.7	24.7	122.84	0	66.564	432190000	149510000	282690000	15	8	4	2	P82094	TATA element modulatory factor
Q8NEB9	PIK3C3	0.180482	0.200782	0.190632	0.0143543	12	12	12	18.6	18.6	18.6	101.55	0	56.389	1049600000	467430000	582150000	6	7	6	6	Q8NEB9	Phosphatidylinositol 3-kinase catalytic subunit type 3
O60341	KDM1A	-0.10653	0.0696425	-0.0184439	0.124573	34	34	34	59.3	59.3	59.3	92.902	0	323.31	12623000000	5967900000	6654800000	19	25	23	20	O60341	Lysine-specific histone demethylase 1A
P11117	ACP2	1.81995	1.39097	1.60546	0.303335	3	3	3	6.9	6.9	6.9	48.344	0	5.962	568800000	135810000	432990000	3	3	3	2	P11117	Lysosomal acid phosphatase
Q8NBJ7	SUMF2	1.19529	1.23025	1.21277	0.0247205	12	12	12	41.9	41.9	41.9	33.843	0	70.11	6035200000	1346100000	4689100000	2	9	10	5	Q8NBJ7	Sulfatase-modifying factor 2
Q9Y262	EIF3L	0.409455	0.168692	0.289074	0.170245	32	32	32	63.5	63.5	63.5	66.726	0	323.31	32544000000	12636000000	19908000000	13	24	30	18	Q9Y262	Eukaryotic translation initiation factor 3 subunit L
Q9H993	ARMT1	-0.102826	0.222061	0.0596172	0.22973	11	11	11	30.8	30.8	30.8	51.172	0	183.49	1554600000	683530000	871050000	4	6	7	4	Q9H993	Protein-glutamate O-methyltransferase
Q9Y3D6	FIS1	-0.936967	-0.54255	-0.739758	0.278895	6	6	6	34.9	34.9	34.9	16.937	0	43.524	2325600000	1185300000	1140300000	4	5	5	6	Q9Y3D6	Mitochondrial fission 1 protein
P61009	SPCS3	0.895015	0.967537	0.931276	0.0512808	5	5	5	28.9	28.9	28.9	20.313	0	15.717	2817100000	934690000	1882400000	2	4	2	3	P61009	Signal peptidase complex subunit 3
Q6ZNJ1	NBEAL2	-0.451978	-0.385639	-0.418809	0.0469088	71	71	71	36.1	36.1	36.1	302.51	0	323.31	6862000000	3395900000	3466100000	57	49	49	49	Q6ZNJ1	Neurobeachin-like protein 2
Q9UM22	EPDR1	0.382976	0.118094	0.250535	0.1873	6	6	6	26.8	26.8	26.8	25.437	0	22.171	2612100000	1097100000	1515000000	3	5	4	6	Q9UM22	Mammalian ependymin-related protein 1
Q16799	RTN1				#DIV/0!	4	4	4	6.1	6.1	6.1	83.617	0	17.265	377380000	134290000	243080000	2	1	3	2	Q16799	Reticulon-1
Q9BQ48	MRPL34	-0.145956	0.0574791	-0.0442387	0.14385	7	7	7	41.3	41.3	41.3	10.165	0	15.41	805240000	460020000	345220000	2	1	5	6	Q9BQ48	39S ribosomal protein L34, mitochondrial
Q9NZD8	SPG21	1.7193	2.27117	1.99524	0.390231	11	11	11	44.5	44.5	44.5	34.96	0	35.905	855400000	210770000	644630000	3	6	8	2	Q9NZD8	Maspardin
Q13085	ACACA	1.79506	1.78305	1.78906	0.00849235	112	112	101	59.2	59.2	54	265.55	0	323.31	27522000000	7965000000	19557000000	73	86	88	84	Q13085	Acetyl-CoA carboxylase 1;Biotin carboxylase
P34810	CD68	2.54068		2.54068	#DIV/0!	3	3	3	17.8	17.8	17.8	37.408	0	31.166	722170000	125180000	596990000	3	2	1	1	P34810	Macrosialin
O14980	XPO1	0.353887	0.431637	0.392762	0.0549776	49	49	49	55	55	55	123.38	0	323.31	54855000000	22876000000	31979000000	34	39	38	35	O14980	Exportin-1
Q9UBV8	PEF1	-1.34943	-1.16543	-1.25743	0.130108	7	7	7	24.3	24.3	24.3	30.381	0	42.562	1782900000	978830000	804040000	3	4	4	3	Q9UBV8	Peflin
Q68D91	MBLAC2	-0.686671	-0.279283	-0.482977	0.288067	11	11	11	49.1	49.1	49.1	31.371	0	116.23	1479700000	698310000	781340000	4	5	9	3	Q68D91	Metallo-beta-lactamase domain-containing protein 2
P11215	ITGAM	-1.48325	-1.21727	-1.35026	0.188076	28	28	27	30.9	30.9	30.9	127.18	0	181.25	2538400000	1452000000	1086300000	13	15	17	17	P11215	Integrin alpha-M
P50748	KNTC1	1.94705	1.89628	1.92167	0.0358998	33	33	33	17.5	17.5	17.5	250.75	0	61.157	1318500000	585140000	733380000	6	25	17	4	P50748	Kinetochore-associated protein 1
P00491	PNP	-0.243804	-0.238643	-0.241224	0.00364938	21	21	21	82.7	82.7	82.7	32.118	0	323.31	60221000000	25640000000	34582000000	14	20	19	16	P00491	Purine nucleoside phosphorylase
P61019	RAB2A	-0.145042	-0.147383	-0.146212	0.00165534	19	19	10	88.7	88.7	52.8	23.545	0	276.48	22709000000	9092000000	13617000000	8	15	15	15	P61019	Ras-related protein Rab-2A
O15173	PGRMC2	-0.659664	-0.527094	-0.593379	0.0937411	11	10	10	39.5	39.5	39.5	23.818	0	105.54	6196900000	2951000000	3245900000	5	8	8	8	O15173	Membrane-associated progesterone receptor component 2
P00846	MT-ATP6	0.51304	0.381231	0.447136	0.093203	2	2	2	6.2	6.2	6.2	24.817	0	5.754	11458000000	4064500000	7394000000	2	2	2	1	P00846	ATP synthase subunit a
O15047	SETD1A	-0.160216	0.497462	0.168623	0.465049	23	23	23	17.2	17.2	17.2	186.03	0	80.339	1016600000	527010000	489600000	13	13	9	6	O15047	Histone-lysine N-methyltransferase SETD1A
O75643	SNRNP200	0.212005	0.153607	0.182806	0.0412936	153	153	152	69.4	69.4	69.1	244.5	0	323.31	128180000000	62346000000	65838000000	125	124	124	116	O75643	U5 small nuclear ribonucleoprotein 200 kDa helicase
P55060	CSE1L	0.95142	0.819929	0.885675	0.0929782	51	51	51	54.5	54.5	54.5	110.42	0	323.31	47162000000	17934000000	29229000000	37	41	36	31	P55060	Exportin-2
Q15019	2002-09-01	-0.547834	-0.80148	-0.674657	0.179355	19	19	18	74.5	74.5	74.5	41.487	0	323.31	19386000000	9913600000	9472900000	9	15	17	12	Q15019	Septin-2
Q14008	CKAP5	-0.520628	-0.743663	-0.632145	0.15771	94	94	94	51.1	51.1	51.1	225.49	0	323.31	21985000000	11994000000	9991000000	74	66	61	56	Q14008	Cytoskeleton-associated protein 5
P02792	FTL	-1.49814	-1.19929	-1.34872	0.211319	12	12	12	62.3	62.3	62.3	20.019	0	205.86	23763000000	11973000000	11790000000	11	10	10	8	P02792	Ferritin light chain
Q9NVG8	TBC1D13	1.43262	1.00311	1.21786	0.303709	6	6	6	18.5	18.5	18.5	46.553	0	12.933	685580000	252650000	432930000	2	4	4	2	Q9NVG8	TBC1 domain family member 13
P23919	DTYMK	1.05197	0.784768	0.91837	0.18894	17	17	17	66.5	66.5	66.5	23.819	0	116.3	8983000000	3045600000	5937400000	0	10	12	12	P23919	Thymidylate kinase
O43772	SLC25A20	-0.412551		-0.412551	#DIV/0!	8	8	8	30.6	30.6	30.6	32.943	0	14.808	1135100000	558610000	576480000	3	3	7	1	O43772	Mitochondrial carnitine/acylcarnitine carrier protein
Q4V328	GRIPAP1	0.128931		0.128931	#DIV/0!	16	16	16	24.9	24.9	24.9	96.004	0	77.244	1112900000	399940000	712920000	7	6	8	1	Q4V328	GRIP1-associated protein 1
Q16204	CCDC6	1.01235	1.11085	1.0616	0.06965	14	14	14	44.1	44.1	44.1	53.29	0	227.1	1368400000	360170000	1008300000	2	9	7	4	Q16204	Coiled-coil domain-containing protein 6
P49757	NUMB				#DIV/0!	5	5	5	8.8	8.8	8.8	70.803	0.00051405	2.7338	102620000	36743000	65878000	2	3	0	1	P49757;Q9Y6R0	Protein numb homolog
Q8IU85	CAMK1D	0.667457		0.667457	#DIV/0!	9	9	6	29.1	29.1	22.1	42.913	0	85.385	1063700000	591590000	472090000	3	2	8	3	Q8IU85	Calcium/calmodulin-dependent protein kinase type 1D
O43674	NDUFB5	0.204662	0.651315	0.427989	0.315831	7	7	7	32.3	32.3	32.3	21.75	0	30.191	2302500000	835560000	1466900000	1	5	4	6	O43674	NADH dehydrogenase [ubiquinone] 1 beta subcomplex subunit 5, mitochondrial
P43490	NAMPT	-0.0622507	-0.18175	-0.122	0.0844988	16	16	16	46.6	46.6	46.6	55.52	0	323.31	7276200000	3215700000	4060500000	8	13	13	6	P43490	Nicotinamide phosphoribosyltransferase
O00566	MPHOSPH10	-1.20201		-1.20201	#DIV/0!	5	5	5	14.4	14.4	14.4	78.863	0	58.444	522720000	277080000	245640000	5	1	2	1	O00566	U3 small nucleolar ribonucleoprotein protein MPP10
P53597	SUCLG1	0.320621	-0.00913041	0.155745	0.233169	13	13	13	37.9	37.9	37.9	36.249	0	304.13	6669800000	3265300000	3404500000	4	7	12	9	P53597	Succinyl-CoA ligase [ADP/GDP-forming] subunit alpha, mitochondrial
Q99598	TSNAX	0.806108	-0.0747012	0.365704	0.622826	9	9	9	42.1	42.1	42.1	33.112	0	279.18	4338200000	1497100000	2841100000	3	4	8	4	Q99598	Translin-associated protein X
Q9NX63	CHCHD3	-0.112592	0.107061	-0.00276581	0.155318	12	12	12	40.5	40.5	40.5	26.152	0	106.79	6939100000	3328200000	3610900000	2	11	9	10	Q9NX63	MICOS complex subunit MIC19
O00410	IPO5	0.0210126	0.0946987	0.0578557	0.0521039	58	58	55	71.9	71.9	70.6	123.63	0	323.31	76368000000	34390000000	41978000000	51	49	41	46	O00410	Importin-5
Q9H0P0	NT5C3A	0.872202		0.872202	#DIV/0!	3	3	3	11	11	11	37.948	0	4.3437	352240000	175270000	176970000	2	0	3	1	Q9H0P0	Cytosolic 5-nucleotidase 3A
P23588	EIF4B	0.627797	0.898329	0.763063	0.191295	20	20	20	32.9	32.9	32.9	69.15	0	323.31	5834900000	2181300000	3653600000	11	15	12	8	P23588	Eukaryotic translation initiation factor 4B
Q9UPP1	PHF8				#DIV/0!	4	4	4	4.4	4.4	4.4	117.86	0.00017209	2.8086	44008000	18503000	25505000	2	1	1	0	Q9UPP1	Histone lysine demethylase PHF8
P50402	EMD	0.70686	1.08332	0.895088	0.266197	10	10	10	46.1	46.1	46.1	28.994	0	126.21	2860700000	566060000	2294600000	0	5	10	4	P50402	Emerin
Q7Z417	NUFIP2	1.57043		1.57043	#DIV/0!	8	8	8	23.2	23.2	23.2	76.12	0	48.115	297710000	86887000	210820000	3	5	4	0	Q7Z417	Nuclear fragile X mental retardation-interacting protein 2
Q10469	MGAT2	0.96323		0.96323	#DIV/0!	9	9	9	26.2	26.2	26.2	51.55	0	70.921	1349100000	221430000	1127700000	2	9	2	0	Q10469	Alpha-1,6-mannosyl-glycoprotein 2-beta-N-acetylglucosaminyltransferase
Q8NEW0	SLC30A7	1.16524	0.597355	0.881298	0.401555	7	7	7	27.7	27.7	27.7	41.625	0	207.14	2592500000	967810000	1624700000	2	7	7	4	Q8NEW0	Zinc transporter 7
O15027	SEC16A	0.370747	0.0733713	0.222059	0.210276	57	57	57	38.1	38.1	38.1	251.89	0	323.31	4809300000	2188000000	2621400000	43	40	27	14	O15027	Protein transport protein Sec16A
Q16836	HADH	0.21541	0.112862	0.164136	0.0725124	17	17	17	66.6	66.6	66.6	34.293	0	323.31	24282000000	8185900000	16096000000	6	11	15	11	Q16836	Hydroxyacyl-coenzyme A dehydrogenase, mitochondrial
Q9BXS5	AP1M1	0.518038	0.743902	0.63097	0.15971	20	20	20	55.6	55.6	55.6	48.586	0	171.44	7535200000	2924300000	4610900000	8	10	18	5	Q9BXS5;Q9Y6Q5	AP-1 complex subunit mu-1
P0CG08;B7ZAQ6	GPR89B;GPR89A	0.523873	0.400041	0.461957	0.0875624	5	5	5	13	13	13	52.916	0	11.506	346160000	171320000	174850000	4	1	5	3	P0CG08;B7ZAQ6	Golgi pH regulator B;Golgi pH regulator A
Q16576	RBBP7	0.61693	0.272609	0.444769	0.243472	13	7	7	50.4	40	40	47.82	0	323.31	5007200000	2144600000	2862700000	8	9	10	7	Q16576	Histone-binding protein RBBP7
Q6R327	RICTOR	1.42162		1.42162	#DIV/0!	12	12	12	9	9	9	192.22	0	19.832	216910000	91984000	124920000	9	2	4	0	Q6R327	Rapamycin-insensitive companion of mTOR
P27694	RPA1	-0.851282	-1.04982	-0.950551	0.140388	29	29	29	52.1	52.1	52.1	68.137	0	323.31	15399000000	9740000000	5658600000	21	16	19	17	P27694	Replication protein A 70 kDa DNA-binding subunit;Replication protein A 70 kDa DNA-binding subunit, N-terminally processed
Q9Y312	AAR2	0.751238		0.751238	#DIV/0!	7	7	7	24.7	24.7	24.7	43.472	0	22.804	322680000	122980000	199700000	2	1	5	1	Q9Y312	Protein AAR2 homolog
P07737	PFN1	-0.312528	-0.119854	-0.216191	0.136241	27	27	20	97.1	97.1	72.1	15.054	0	323.31	204360000000	86780000000	117580000000	14	23	22	20	P07737	Profilin-1
P49736	MCM2	0.976925	0.963514	0.97022	0.00948301	44	44	44	57.7	57.7	57.7	101.89	0	323.31	68596000000	28318000000	40278000000	38	37	33	34	P49736	DNA replication licensing factor MCM2
P15374	UCHL3	0.325572	0.414047	0.36981	0.0625613	15	15	15	78.7	78.7	78.7	26.182	0	323.31	4509600000	1803400000	2706200000	4	8	10	11	P15374	Ubiquitin carboxyl-terminal hydrolase isozyme L3
Q9BUH6	C9orf142	0.403369	0.392484	0.397927	0.00769686	10	10	10	61.3	61.3	61.3	21.639	0	117.6	2101800000	720860000	1380900000	2	6	6	8	Q9BUH6	Protein PAXX
P62979;P0CG47;P0CG48	RPS27A;UBB;UBC	-0.19821	0.0932517	-0.0524791	0.206095	21	21	3	68.6	68.6	21.2	17.965	0	323.31	168730000000	71983000000	96748000000	11	19	20	19	P62979;P0CG47;P0CG48	Ubiquitin-40S ribosomal protein S27a;Ubiquitin;40S ribosomal protein S27a;Polyubiquitin-B;Ubiquitin;Polyubiquitin-C;Ubiquitin
Q15645	TRIP13	1.05968	1.08926	1.07447	0.0209162	16	16	16	39.6	39.6	39.6	48.55	0	55.443	2348600000	661560000	1687100000	5	9	9	3	Q15645	Pachytene checkpoint protein 2 homolog
P31153	MAT2A	-0.134708	-0.151034	-0.142871	0.0115442	13	13	13	52.7	52.7	52.7	43.66	0	276.62	7054400000	3133400000	3921000000	4	7	11	4	P31153;Q00266	S-adenosylmethionine synthase isoform type-2
Q15542	TAF5	0.535626		0.535626	#DIV/0!	2	2	2	2.9	2.9	2.9	86.829	0.00017203	2.7965	102240000	46655000	55581000	2	1	2	0	Q15542	Transcription initiation factor TFIID subunit 5
P35240	NF2	-1.3876		-1.3876	#DIV/0!	5	5	5	10.1	10.1	10.1	69.689	0	9.1202	269050000	159380000	109670000	2	2	4	1	P35240	Merlin
P49327	FASN	-0.414575	-0.328945	-0.37176	0.0605496	158	158	158	72.6	72.6	72.6	273.42	0	323.31	613470000000	322180000000	291290000000	136	138	137	139	P49327	Fatty acid synthase;[Acyl-carrier-protein] S-acetyltransferase;[Acyl-carrier-protein] S-malonyltransferase;3-oxoacyl-[acyl-carrier-protein] synthase;3-oxoacyl-[acyl-carrier-protein] reductase;3-hydroxyacyl-[acyl-carrier-protein] dehydratase;Enoyl-[acyl-carrier-protein] reductase;Oleoyl-[acyl-carrier-protein] hydrolase
Q15637	SF1	-0.759818	-0.91297	-0.836394	0.108295	14	14	14	30.4	30.4	30.4	68.329	0	225.21	12368000000	6614900000	5752900000	8	11	8	6	Q15637	Splicing factor 1
P42858	HTT	0.531953	0.572319	0.552136	0.0285431	85	85	85	35.6	35.6	35.6	347.6	0	323.31	5443100000	2397000000	3046100000	65	52	44	49	P42858	Huntingtin
Q15437	SEC23B	0.385134	0.246891	0.316013	0.0977526	35	35	32	62.5	62.5	57.8	86.478	0	323.31	20319000000	8922400000	11396000000	22	28	25	20	Q15437	Protein transport protein Sec23B
P11310	ACADM	-0.0549073	0.129789	0.0374408	0.1306	16	16	16	45.1	45.1	45.1	46.588	0	188.92	8517200000	4032400000	4484900000	5	10	12	6	P11310	Medium-chain specific acyl-CoA dehydrogenase, mitochondrial
Q9ULW0	TPX2				#DIV/0!	8	8	8	17.7	17.7	17.7	85.652	0	112.45	174660000	70368000	104290000	4	4	0	0	Q9ULW0	Targeting protein for Xklp2
O95197	RTN3	-0.160941	0.442697	0.140878	0.426837	6	6	6	9.6	9.6	9.6	112.61	0	154.99	6191600000	2763400000	3428300000	2	5	3	4	O95197	Reticulon-3
O43707	ACTN4	0.291585	0.207634	0.249609	0.0593623	75	50	49	78.7	55.9	55.9	104.85	0	323.31	163340000000	63322000000	100020000000	62	70	50	46	O43707	Alpha-actinin-4
P42677	RPS27	0.454722	0.528616	0.491669	0.0522509	7	7	3	75	75	15.5	9.461	0	68.819	28942000000	10691000000	18251000000	4	7	7	6	P42677	40S ribosomal protein S27
Q9NZT2	OGFR	1.00356	0.861844	0.932702	0.100208	15	15	15	37.2	37.2	37.2	73.324	0	179.27	2414300000	796330000	1617900000	7	10	9	6	Q9NZT2	Opioid growth factor receptor
O94886	TMEM63A				#DIV/0!	5	5	5	5.9	5.9	5.9	92.125	0	4.1796	59449000	23444000	36005000	4	1	1	1	O94886	CSC1-like protein 1
Q9Y6M1	IGF2BP2	2.91432	2.2938	2.60406	0.438774	19	19	18	41.1	41.1	38.9	66.121	0	269.17	4592500000	1043100000	3549400000	7	18	9	7	Q9Y6M1	Insulin-like growth factor 2 mRNA-binding protein 2
P16401	HIST1H1B	-0.367009	-0.894038	-0.630523	0.372666	19	19	14	43.4	43.4	29.6	22.58	0	128.85	13242000000	5589100000	7652600000	3	15	7	8	P16401	Histone H1.5
O95347	SMC2	1.39069	1.22249	1.30659	0.118935	69	69	69	54.4	54.4	54.4	135.65	0	323.31	28720000000	9604100000	19116000000	44	48	38	46	O95347	Structural maintenance of chromosomes protein 2
Q8WVT3	TRAPPC12	0.169024	0.215592	0.192308	0.0329285	6	6	6	11.2	11.2	11.2	79.374	0	81.099	336120000	164250000	171870000	4	1	2	2	Q8WVT3	Trafficking protein particle complex subunit 12
Q9Y6G9	DYNC1LI1	0.430889	0.177569	0.304229	0.179124	19	19	17	43.8	43.8	41.3	56.578	0	105.68	4528900000	1704200000	2824700000	4	13	12	6	Q9Y6G9	Cytoplasmic dynein 1 light intermediate chain 1
Q9Y5S2	CDC42BPB	-0.862828	-2.02934	-1.44608	0.824849	21	16	16	15.1	12.5	12.5	194.31	0	37.92	572270000	354880000	217380000	7	4	13	11	Q9Y5S2	Serine/threonine-protein kinase MRCK beta
Q9NRX5	SERINC1				#DIV/0!	2	2	2	6.6	6.6	6.6	50.494	0	22.652	49588000	14208000	35380000	0	2	1	0	Q9NRX5	Serine incorporator 1
Q13123	IK	-0.388387	0.118129	-0.135129	0.358161	14	14	14	31.6	31.6	31.6	65.601	0	153.56	2028600000	1062500000	966060000	10	6	7	7	Q13123	Protein Red
Q8WWI5	SLC44A1	-1.5458		-1.5458	#DIV/0!	3	3	3	6.7	6.7	6.7	73.301	0	12.027	209310000	104410000	104900000	3	2	3	1	Q8WWI5	Choline transporter-like protein 1
O60493	SNX3	0.416428	0.0661358	0.241282	0.247694	11	11	11	68.5	68.5	68.5	18.762	0	73.169	5316500000	2492700000	2823800000	3	6	8	9	O60493	Sorting nexin-3
Q9HA77	CARS2	-0.180622	-0.219311	-0.199966	0.0273573	11	11	11	22.5	22.5	22.5	62.223	0	16.988	959960000	298070000	661890000	2	8	4	2	Q9HA77	Probable cysteine--tRNA ligase, mitochondrial
P30520	ADSS	0.283758	0.335137	0.309448	0.0363304	18	18	18	51.5	51.5	51.5	50.097	0	323.31	10618000000	4358400000	6259100000	10	12	13	10	P30520;Q8N142	Adenylosuccinate synthetase isozyme 2
O15067	PFAS	-0.3137	-0.249273	-0.281487	0.0455568	51	51	51	57.3	57.3	57.3	144.73	0	323.31	34440000000	16457000000	17983000000	34	36	31	41	O15067	Phosphoribosylformylglycinamidine synthase
P09661	SNRPA1	-0.0926276	-0.0690275	-0.0808275	0.0166878	11	11	11	39.2	39.2	39.2	28.415	0	323.31	13783000000	6516500000	7266300000	5	6	10	8	P09661	U2 small nuclear ribonucleoprotein A
A6NKT7	RGPD3		-0.192124	-0.192124	#DIV/0!	54	3	1	36.5	2.5	0.9	197.48	0	8.8207	2805800000	469330000	2336500000	44	39	36	38	A6NKT7	RanBP2-like and GRIP domain-containing protein 3
Q99757	TXN2	-0.348273	-0.325136	-0.336704	0.0163603	7	7	7	46.4	46.4	46.4	18.383	0	90.323	5092800000	2619900000	2472900000	5	4	5	4	Q99757	Thioredoxin, mitochondrial
Q96AE4	FUBP1	0.3219	0.0796787	0.200789	0.171276	27	24	23	53.1	50.5	49.1	67.56	0	323.31	14673000000	6279400000	8393700000	14	21	15	17	Q96AE4	Far upstream element-binding protein 1
Q92600	RQCD1	0.541262	0.480421	0.510841	0.0430211	9	9	9	37.5	37.5	37.5	33.631	0	80.136	3369400000	1485800000	1883700000	4	7	7	5	Q92600	Cell differentiation protein RCD1 homolog
Q15392	DHCR24	1.16475	1.53215	1.34845	0.259791	8	8	8	15.9	15.9	15.9	60.101	0	14.297	1661000000	451500000	1209500000	5	6	5	3	Q15392	Delta(24)-sterol reductase
P48147	PREP	0.172218	0.299475	0.235847	0.0899843	42	42	42	75.9	75.9	75.9	80.699	0	323.31	39841000000	16174000000	23668000000	29	42	31	29	P48147	Prolyl endopeptidase
P33991	MCM4	1.05134	1.04325	1.0473	0.00572049	52	52	51	65.9	65.9	65.1	96.557	0	323.31	52074000000	21346000000	30728000000	39	39	36	31	P33991	DNA replication licensing factor MCM4
P63244	GNB2L1	-0.0657463	-0.128113	-0.0969296	0.0440999	26	26	26	91.5	91.5	91.5	35.076	0	323.31	72656000000	25465000000	47191000000	9	23	23	13	P63244	Guanine nucleotide-binding protein subunit beta-2-like 1;Guanine nucleotide-binding protein subunit beta-2-like 1, N-terminally processed
Q8TBC4	UBA3	0.183621	0.223029	0.203325	0.0278657	14	14	14	43	43	43	51.852	0	190.78	4645100000	1847200000	2797900000	6	11	13	5	Q8TBC4	NEDD8-activating enzyme E1 catalytic subunit
P36542	ATP5C1	0.754347	0.666574	0.71046	0.0620649	12	12	12	45	45	45	32.996	0	96.406	21723000000	7063100000	14660000000	5	11	9	7	P36542	ATP synthase subunit gamma, mitochondrial
O95749	GGPS1	-0.317557	-0.492059	-0.404808	0.123392	8	8	8	32	32	32	34.87	0	33.769	1181600000	577100000	604510000	2	3	7	3	O95749	Geranylgeranyl pyrophosphate synthase
Q9BVM4	GGACT	-0.116916		-0.116916	#DIV/0!	5	5	5	34	34	34	17.328	0	99.355	1543700000	871530000	672140000	4	2	4	2	Q9BVM4	Gamma-glutamylaminecyclotransferase
P38646	HSPA9	1.08641	1.05258	1.06949	0.0239214	49	48	48	66	66	66	73.68	0	323.31	136450000000	46819000000	89636000000	38	45	33	29	P38646	Stress-70 protein, mitochondrial
Q96L58	B3GALT6	0.575933		0.575933	#DIV/0!	5	5	5	19.1	19.1	19.1	37.137	0	7.6483	142710000	50171000	92539000	4	1	2	0	Q96L58	Beta-1,3-galactosyltransferase 6
O43683	BUB1				#DIV/0!	4	4	4	5.1	5.1	5.1	122.37	0	7.5784	44970000	23936000	21034000	3	2	0	0	O43683	Mitotic checkpoint serine/threonine-protein kinase BUB1
Q13435	SF3B2	-0.0350411	-0.130554	-0.0827977	0.0675378	51	51	51	54.5	54.5	54.5	100.23	0	323.31	42620000000	20756000000	21864000000	45	39	36	40	Q13435	Splicing factor 3B subunit 2
Q07020	RPL18	-0.0613778	-0.056274	-0.0588259	0.00360893	9	9	9	43.1	43.1	43.1	21.634	0	65.602	54365000000	31720000000	22645000000	6	7	9	9	Q07020	60S ribosomal protein L18
P21281	ATP6V1B2	0.0736419	1.07455	0.574096	0.707749	19	19	19	51.1	51.1	51.1	56.5	0	323.31	13974000000	5028300000	8946100000	11	15	12	11	P21281;P15313	V-type proton ATPase subunit B, brain isoform
P21796	VDAC1	0.902324	0.773111	0.837718	0.0913674	34	34	34	92.2	92.2	92.2	30.772	0	323.31	126050000000	28709000000	97339000000	14	32	24	19	P21796	Voltage-dependent anion-selective channel protein 1
Q9NSE4	IARS2	0.179719	0.150863	0.165291	0.0204043	38	38	38	42	42	42	113.79	0	323.31	14526000000	6240300000	8285900000	20	28	19	23	Q9NSE4	Isoleucine--tRNA ligase, mitochondrial
Q6BDS2	UHRF1BP1	0.611403		0.611403	#DIV/0!	6	6	5	4.4	4.4	4	159.48	0	4.5416	104590000	35502000	69083000	2	3	3	1	Q6BDS2	UHRF1-binding protein 1
Q9Y6B7	AP4B1	0.647081	0.710325	0.678703	0.0447203	6	6	6	11.9	11.9	11.9	83.259	0	5.7646	196300000	71295000	125010000	4	3	4	3	Q9Y6B7	AP-4 complex subunit beta-1
Q96I99	SUCLG2	0.195276	0.232679	0.213977	0.0264479	14	14	14	40.3	40.3	40.3	46.51	0	136.57	3220900000	1460700000	1760100000	4	8	11	4	Q96I99	Succinyl-CoA ligase [GDP-forming] subunit beta, mitochondrial
Q9HC21	SLC25A19	0.253588	0.274017	0.263803	0.0144455	18	18	18	55.9	55.9	55.9	35.511	0	30.231	2879100000	1044000000	1835100000	5	9	12	5	Q9HC21	Mitochondrial thiamine pyrophosphate carrier
Q15155	NOMO1	-0.669944	-0.714378	-0.692161	0.0314196	54	3	3	58.1	4.2	4.2	134.32	0	105.02	748770000	354840000	393930000	47	49	43	43	Q15155	Nodal modulator 1
Q9BUL8	PDCD10	-0.760832	-0.731507	-0.746169	0.0207359	13	13	13	67.9	67.9	67.9	24.701	0	159.98	6304600000	3417900000	2886700000	3	9	10	9	Q9BUL8	Programmed cell death protein 10
P41227	NAA10	0.199435	0.365909	0.282672	0.117715	12	12	12	68.5	68.5	68.5	26.458	0	280.24	3358900000	1553100000	1805800000	2	4	6	3	P41227;Q9BSU3	N-alpha-acetyltransferase 10
Q9Y5U8	MPC1	0.60111	0.82409	0.7126	0.157671	6	6	6	68.8	68.8	68.8	12.347	0	65.986	1785200000	567770000	1217500000	2	4	3	3	Q9Y5U8	Mitochondrial pyruvate carrier 1
P49588	AARS	0.840832	0.869402	0.855117	0.020202	53	53	53	65	65	65	106.81	0	323.31	44070000000	16291000000	27779000000	36	37	33	40	P49588	Alanine--tRNA ligase, cytoplasmic
Q6BCY4	CYB5R2	6.61311		6.61311	#DIV/0!	11	11	11	45.3	45.3	45.3	31.458	0	39.03	914380000	28474000	885900000	5	8	6	2	Q6BCY4	NADH-cytochrome b5 reductase 2
Q9Y520	PRRC2C	1.22293	1.14184	1.18238	0.0573393	89	89	87	35.9	35.9	35.3	316.91	0	323.31	10223000000	4065900000	6156700000	80	67	44	30	Q9Y520	Protein PRRC2C
O75116	ROCK2	0.0356917	-0.0466551	-0.00548167	0.058228	49	43	43	44.7	39.8	39.8	160.9	0	285.9	4426000000	1866900000	2559100000	28	34	27	25	O75116	Rho-associated protein kinase 2
Q9H6Z4	RANBP3	-0.384375	-0.861598	-0.622986	0.337448	12	12	12	30.2	30.2	30.2	60.209	0	144.55	2241700000	1134900000	1106800000	5	9	6	6	Q9H6Z4	Ran-binding protein 3
Q9H4A3	WNK1	1.02598	1.74195	1.38396	0.506267	41	41	34	20.9	20.9	18.1	250.79	0	213.68	2840000000	959890000	1880100000	28	28	13	11	Q9H4A3;Q96J92	Serine/threonine-protein kinase WNK1
Q96JI7	SPG11	-0.146545	0.322879	0.0881671	0.331933	19	19	19	9.4	9.4	9.4	278.86	0	41.903	379970000	190410000	189560000	10	7	11	8	Q96JI7	Spatacsin
Q9UHL4	DPP7	0.427886	0.14455	0.286218	0.200349	14	14	14	44.3	44.3	44.3	54.341	0	198.26	4915400000	1006600000	3908800000	7	13	6	4	Q9UHL4	Dipeptidyl peptidase 2
Q6L8Q7	PDE12	1.08282	0.864148	0.973484	0.154624	14	14	14	36.5	36.5	36.5	67.351	0	216.29	5015100000	1817800000	3197300000	8	12	8	8	Q6L8Q7	2,5-phosphodiesterase 12
Q96ES7	CCDC101	0.295647		0.295647	#DIV/0!	4	4	4	26.6	26.6	26.6	33.238	0	64.426	391870000	122980000	268890000	2	3	3	2	Q96ES7	SAGA-associated factor 29 homolog
Q9NTJ3	SMC4	1.44097	1.34565	1.39331	0.0674014	75	75	75	60.7	60.7	60.7	147.18	0	323.31	31721000000	10344000000	21377000000	46	49	61	63	Q9NTJ3	Structural maintenance of chromosomes protein 4
Q8WVJ2	NUDCD2	-0.399097	0.172538	-0.11328	0.404207	5	5	5	41.4	41.4	41.4	17.676	0	112.88	1725700000	841880000	883790000	2	3	3	4	Q8WVJ2	NudC domain-containing protein 2
P31150	GDI1	0.584595	0.654054	0.619325	0.0491149	18	10	10	55.7	38.3	38.3	50.582	0	245.73	2699000000	784350000	1914600000	10	17	10	8	P31150	Rab GDP dissociation inhibitor alpha
P42704	LRPPRC	0.373541	0.300091	0.336816	0.051937	110	110	109	75.3	75.3	74.8	157.9	0	323.31	192310000000	90211000000	102100000000	89	87	91	95	P42704	Leucine-rich PPR motif-containing protein, mitochondrial
Q13418	ILK	1.10027	1.59933	1.3498	0.352889	9	9	9	29.2	29.2	29.2	51.419	0	25.139	849590000	332090000	517500000	3	4	4	5	Q13418	Integrin-linked protein kinase
O75064	DENND4B	0.537742	0.769749	0.653746	0.164054	22	22	22	20.3	20.3	20.3	163.84	0	98.264	848760000	211140000	637620000	7	17	7	4	O75064	DENN domain-containing protein 4B
P16152	CBR1	0.110427	-0.069955	0.0202362	0.127549	17	17	15	72.9	72.9	62.5	30.375	0	323.31	22192000000	10365000000	11827000000	9	14	13	13	P16152	Carbonyl reductase [NADPH] 1
Q9Y490	TLN1	-0.0268911	0.05739	0.0152494	0.0595957	162	162	145	71.2	71.2	66.5	269.76	0	323.31	377400000000	185200000000	192200000000	139	139	140	138	Q9Y490	Talin-1
Q9BRA2	TXNDC17	-0.491899	-0.202082	-0.34699	0.204932	4	4	4	43.1	43.1	43.1	13.941	0	39.547	6742600000	3619700000	3123000000	3	4	4	4	Q9BRA2	Thioredoxin domain-containing protein 17
P82979	SARNP	-1.02511		-1.02511	#DIV/0!	9	9	9	59.5	59.5	59.5	23.671	0	89.958	3895900000	1028800000	2867100000	1	8	3	2	P82979	SAP domain-containing ribonucleoprotein
Q15126	PMVK	0.0911918	0.175247	0.133219	0.059436	13	13	13	62	62	62	21.995	0	52.902	3523400000	1768200000	1755200000	4	7	7	11	Q15126	Phosphomevalonate kinase
Q9UBQ0	VPS29	-0.0934311	0.201109	0.0538387	0.208271	9	9	9	57.1	57.1	57.1	20.505	0	133.27	7212000000	4136000000	3076000000	5	7	8	7	Q9UBQ0	Vacuolar protein sorting-associated protein 29
Q15056	EIF4H	0.0919961	0.361463	0.22673	0.190542	9	9	9	39.1	39.1	39.1	27.385	0	302.76	16719000000	6520500000	10198000000	4	8	8	8	Q15056	Eukaryotic translation initiation factor 4H
Q9UQ80	PA2G4	0.253088	0.195378	0.224233	0.0408071	26	26	26	72.1	72.1	72.1	43.786	0	323.31	30732000000	10517000000	20215000000	10	19	21	13	Q9UQ80	Proliferation-associated protein 2G4
Q8WUX1	SLC38A5	-0.803029	0.0271017	-0.387964	0.586991	2	2	2	4.7	4.7	4.7	51.457	0.00017221	2.8214	178090000	88240000	89851000	2	0	1	1	Q8WUX1	Sodium-coupled neutral amino acid transporter 5
O75436	VPS26A	0.0164544	-0.0692492	-0.0263974	0.0606016	11	11	10	41.9	41.9	39.8	38.169	0	235.51	4148100000	1741700000	2406400000	8	5	9	7	O75436	Vacuolar protein sorting-associated protein 26A
P60891	PRPS1	0.564037	0.439868	0.501953	0.0878007	15	15	7	49.1	49.1	23	34.834	0	320.67	17093000000	6069300000	11024000000	6	10	12	11	P60891;P21108	Ribose-phosphate pyrophosphokinase 1
P11172	UMPS	1.12937	0.838961	0.984168	0.20535	21	21	21	48.1	48.1	48.1	52.221	0	196.19	7804300000	2890600000	4913700000	8	11	15	9	P11172	Uridine 5-monophosphate synthase;Orotate phosphoribosyltransferase;Orotidine 5-phosphate decarboxylase
Q13547	HDAC1	0.0459716	0.495958	0.270965	0.318188	15	15	8	38.2	38.2	23.4	55.102	0	80.758	8525500000	3520400000	5005100000	3	12	10	10	Q13547	Histone deacetylase 1
P50454	SERPINH1	0.998396	0.5559	0.777148	0.312892	21	21	21	58.4	58.4	58.4	46.44	0	323.31	42369000000	15214000000	27156000000	11	18	16	13	P50454	Serpin H1
Q5U5X0	LYRM7	0.143606	0.52808	0.335843	0.271864	3	3	3	40.4	40.4	40.4	11.955	0	52.741	1385100000	673930000	711150000	1	2	3	3	Q5U5X0	Complex III assembly factor LYRM7
Q9NTJ5	SACM1L	1.59961	1.49718	1.54839	0.0724289	27	27	27	50.4	50.4	50.4	66.966	0	173.7	9155200000	2830000000	6325200000	9	18	21	14	Q9NTJ5	Phosphatidylinositide phosphatase SAC1
Q6NXT4	SLC30A6	1.17557		1.17557	#DIV/0!	3	3	3	12.4	12.4	12.4	51.115	0	11.792	323860000	107560000	216300000	1	3	2	2	Q6NXT4	Zinc transporter 6
Q6P1Q0	LETMD1	1.55617		1.55617	#DIV/0!	6	6	6	18.1	18.1	18.1	41.79	0	4.163	865290000	372030000	493260000	3	4	4	0	Q6P1Q0	LETM1 domain-containing protein 1
P50990	CCT8	0.349331	0.389715	0.369523	0.0285558	37	37	37	71	71	71	59.62	0	323.31	76802000000	23607000000	53195000000	17	36	20	20	P50990	T-complex protein 1 subunit theta
P42338	PIK3CB	1.489	1.23525	1.36213	0.179428	24	22	22	28	26.6	26.6	122.76	0	166.95	1698400000	486170000	1212300000	15	15	13	11	P42338	Phosphatidylinositol 4,5-bisphosphate 3-kinase catalytic subunit beta isoform
O95235	KIF20A				#DIV/0!	2	2	2	3.3	3.3	3.3	100.28	0.0092724	1.2532	75197000	53097000	22100000	2	0	0	0	O95235	Kinesin-like protein KIF20A
Q13561	DCTN2	-0.096056	-0.186832	-0.141444	0.0641883	9	9	9	28.4	28.4	28.4	44.23	0	153.61	3506300000	1687500000	1818800000	4	7	8	3	Q13561	Dynactin subunit 2
P18085	ARF4	0.996778	1.29027	1.14352	0.20753	12	6	6	68.9	35.6	35.6	20.511	0	41.515	7622000000	3000200000	4621800000	10	11	12	10	P18085	ADP-ribosylation factor 4
Q9NQR4	NIT2	1.23611	0.996843	1.11648	0.169187	18	18	18	74.3	74.3	74.3	30.608	0	323.31	8252100000	2680500000	5571600000	7	14	13	10	Q9NQR4	Omega-amidase NIT2
P35241	RDX	-0.549799	-0.535029	-0.542414	0.010444	37	20	20	52.7	32.2	32.2	68.563	0	200.9	8050300000	4079300000	3970900000	25	32	25	21	P35241	Radixin
Q9Y5J7	TIMM9	-0.813538	-0.79172	-0.802629	0.0154277	8	8	8	86.5	86.5	86.5	10.378	0	40.929	5827400000	3435800000	2391700000	2	6	8	6	Q9Y5J7	Mitochondrial import inner membrane translocase subunit Tim9
Q13057	COASY	0.823379	0.263346	0.543362	0.396003	11	11	11	32.3	32.3	32.3	62.328	0	136.14	4373200000	1726100000	2647100000	4	10	7	5	Q13057	Bifunctional coenzyme A synthase;Phosphopantetheine adenylyltransferase;Dephospho-CoA kinase
Q9NX02	NLRP2	3.7059	2.14268	2.92429	1.10536	12	12	12	14.6	14.6	14.6	120.51	0	21.158	449300000	68446000	380860000	5	6	5	6	Q9NX02;Q8WX94	NACHT, LRR and PYD domains-containing protein 2
O95406	CNIH1	-0.666414	0.0467334	-0.30984	0.504271	2	2	2	20.1	20.1	20.1	16.699	0	55.435	740410000	322890000	417520000	1	1	2	2	O95406	Protein cornichon homolog 1
P04049	RAF1				#DIV/0!	6	6	3	12.3	12.3	7.4	73.051	0	25.811	422020000	185270000	236750000	4	4	2	2	P04049	RAF proto-oncogene serine/threonine-protein kinase
O14773	TPP1	-0.351276	-0.556944	-0.45411	0.145429	14	14	14	43.3	43.3	43.3	61.247	0	82.352	2653100000	1262000000	1391200000	8	5	4	5	O14773	Tripeptidyl-peptidase 1
Q9NXJ5	PGPEP1				#DIV/0!	4	4	4	36.8	36.8	36.8	23.138	0	20.447	189230000	47553000	141680000	0	3	1	0	Q9NXJ5	Pyroglutamyl-peptidase 1
Q16531	DDB1	-0.037315	0.00857541	-0.0143698	0.0324494	65	65	65	58.8	58.8	58.8	126.97	0	323.31	70230000000	31405000000	38825000000	59	58	50	57	Q16531	DNA damage-binding protein 1
Q14562	DHX8	0.556943	0.809765	0.683354	0.178772	22	21	21	23.4	22.7	22.7	139.31	0	125.51	1586500000	711640000	874890000	13	9	12	11	Q14562	ATP-dependent RNA helicase DHX8
P25205	MCM3	0.870229	0.782351	0.82629	0.0621391	53	53	53	67.5	67.5	67.5	90.98	0	323.31	60603000000	23897000000	36706000000	36	39	40	31	P25205	DNA replication licensing factor MCM3
Q9NWU1	OXSM	-0.550154	-0.573961	-0.562057	0.0168341	10	10	10	39.9	39.9	39.9	48.842	0	93.069	1419000000	541990000	877060000	5	6	6	2	Q9NWU1	3-oxoacyl-[acyl-carrier-protein] synthase, mitochondrial
Q9Y4P3	TBL2	0.484783	0.538784	0.511783	0.0381845	16	16	16	44.1	44.1	44.1	49.797	0	72.268	1822500000	881410000	941050000	2	8	13	4	Q9Y4P3	Transducin beta-like protein 2
Q9P2T1	GMPR2	0.441953	0.0625506	0.252252	0.268278	10	8	8	38.8	32.8	32.8	37.874	0	49.052	906560000	523770000	382790000	3	3	8	3	Q9P2T1	GMP reductase 2
A6NDU8	C5orf51	-0.0267281		-0.0267281	#DIV/0!	5	5	5	26.2	26.2	26.2	33.62	0	121.14	911580000	388030000	523550000	2	3	4	0	A6NDU8	UPF0600 protein C5orf51
Q53H82	LACTB2	0.0437363	0.0651427	0.0544395	0.0151366	12	12	12	55.9	55.9	55.9	32.805	0	148.05	4475300000	1954000000	2521300000	3	8	10	6	Q53H82	Beta-lactamase-like protein 2
P25787	PSMA2	0.467691	0.520276	0.493983	0.0371832	19	19	19	87.2	87.2	87.2	25.898	0	323.31	40703000000	12822000000	27881000000	11	17	16	15	P25787	Proteasome subunit alpha type-2
Q13131	PRKAA1	-0.446995	-0.276692	-0.361844	0.120422	12	12	12	32.6	32.6	32.6	64.009	0	183.47	1555000000	835990000	719040000	3	6	10	6	Q13131;P54646	5-AMP-activated protein kinase catalytic subunit alpha-1
Q9UBB4	ATXN10	1.29414	1.49276	1.39345	0.140446	17	17	17	48.6	48.6	48.6	53.488	0	80.512	3394200000	983380000	2410900000	6	9	9	6	Q9UBB4	Ataxin-10
Q9Y547	HSPB11	1.94947	1.8178	1.88363	0.0931047	6	6	6	57.6	57.6	57.6	16.297	0	169.13	4842000000	1313800000	3528100000	5	4	6	4	Q9Y547	Intraflagellar transport protein 25 homolog
P53618	COPB1	0.520317	0.423223	0.47177	0.0686558	50	50	50	60	60	60	107.14	0	323.31	37846000000	15685000000	22161000000	41	35	37	29	P53618	Coatomer subunit beta
Q9NX61	TMEM161A	-0.387065	-1.02896	-0.708015	0.453888	5	5	5	10.9	10.9	10.9	53.601	0	4.1786	200350000	118470000	81880000	2	3	3	3	Q9NX61	Transmembrane protein 161A
Q9HC38	GLOD4	-0.691689	-0.74827	-0.71998	0.0400088	14	14	14	59.7	59.7	59.7	34.793	0	258.17	9134100000	4586100000	4548000000	7	8	13	6	Q9HC38	Glyoxalase domain-containing protein 4
Q8IWZ8	SUGP1	-1.21746		-1.21746	#DIV/0!	7	7	7	14.1	14.1	14.1	72.47	0	35.656	427060000	252750000	174300000	3	3	3	1	Q8IWZ8	SURP and G-patch domain-containing protein 1
P40926	MDH2	0.808156	0.886905	0.847531	0.055684	27	27	27	69.8	69.8	69.8	35.503	0	323.31	220330000000	62609000000	157720000000	13	21	18	20	P40926	Malate dehydrogenase, mitochondrial
Q9H840	GEMIN7	-0.568024		-0.568024	#DIV/0!	2	2	2	24.4	24.4	24.4	14.536	0	12.844	244780000	149350000	95422000	2	0	2	1	Q9H840	Gem-associated protein 7
O75431	MTX2	0.172724	0.0756116	0.124168	0.0686688	8	8	8	42.6	42.6	42.6	29.763	0	323.31	5298700000	2212200000	3086500000	3	7	5	6	O75431	Metaxin-2
P61289	PSME3	0.0600673	0.126749	0.0934082	0.0471511	15	15	15	72.4	72.4	72.4	29.506	0	197.7	9057200000	4166200000	4891000000	8	12	11	9	P61289	Proteasome activator complex subunit 3
Q8NDI1	EHBP1				#DIV/0!	4	3	3	4.3	3.7	3.7	140.02	0	8.1099	118960000	88490000	30470000	3	3	2	0	Q8NDI1	EH domain-binding protein 1
Q15149	PLEC	-0.202229	-0.104008	-0.153119	0.0694527	313	312	304	65.1	64.9	63.9	531.78	0	323.31	104200000000	56908000000	47288000000	264	247	225	266	Q15149	Plectin
P84077	ARF1	0.554991	0.718604	0.636797	0.115692	16	16	2	87.3	87.3	21	20.697	0	323.31	70927000000	25029000000	45898000000	13	13	13	13	P84077	ADP-ribosylation factor 1
Q01658	DR1	-0.811956	-1.10112	-0.956539	0.20447	6	6	6	41.5	41.5	41.5	19.443	0	46.649	3097100000	1710000000	1387100000	2	3	3	6	Q01658	Protein Dr1
O76003	GLRX3	0.300995	0.393795	0.347395	0.0656195	13	13	13	51.3	51.3	51.3	37.432	0	266.7	5065900000	2235500000	2830400000	7	4	10	5	O76003	Glutaredoxin-3
Q13428	TCOF1	0.874752	0.579102	0.726927	0.209056	41	41	41	29.6	29.6	29.6	152.1	0	200.82	7731700000	3401400000	4330400000	25	31	26	30	Q13428	Treacle protein
Q8TDB6	DTX3L	-0.261401		-0.261401	#DIV/0!	4	4	4	6.2	6.2	6.2	83.553	0	21.645	144010000	90457000	53557000	4	0	2	0	Q8TDB6	E3 ubiquitin-protein ligase DTX3L
P14854	COX6B1	-0.457052	-0.593458	-0.525255	0.0964536	10	10	10	83.7	83.7	83.7	10.192	0	95.525	3868600000	2327600000	1541000000	3	7	6	8	P14854	Cytochrome c oxidase subunit 6B1
P23258;Q9NRH3	TUBG1;TUBG2	-0.069374	-0.189962	-0.129668	0.0852686	16	16	16	61.6	61.6	61.6	51.169	0	323.31	5570900000	2654100000	2916800000	12	11	11	11	P23258;Q9NRH3	Tubulin gamma-1 chain;Tubulin gamma-2 chain
Q9Y5X3	SNX5	-0.791299	-0.665765	-0.728532	0.0887659	18	18	18	59.7	59.7	59.7	46.816	0	317.17	5899500000	3476600000	2422900000	7	6	14	9	Q9Y5X3	Sorting nexin-5
Q69YN2	CWF19L1	0.959486	0.901441	0.930463	0.041044	9	9	9	21.7	21.7	21.7	60.618	0	81.539	940260000	318730000	621530000	1	7	7	5	Q69YN2	CWF19-like protein 1
P27635	RPL10	0.147344	0.0676775	0.107511	0.0563327	12	12	12	47.2	47.2	47.2	24.604	0	222.78	35778000000	19067000000	16711000000	4	9	9	11	P27635;Q96L21	60S ribosomal protein L10
Q99627	COPS8	0.556107	0.670151	0.613129	0.0806413	8	8	8	54.1	54.1	54.1	23.225	0	132.65	2989300000	1081600000	1907700000	3	5	6	5	Q99627	COP9 signalosome complex subunit 8
Q8TC07	TBC1D15	0.804541	0.787411	0.795976	0.0121127	17	17	17	29.7	29.7	29.7	79.49	0	56.707	2373700000	1047300000	1326400000	6	12	9	3	Q8TC07	TBC1 domain family member 15
O00231	PSMD11	-0.156969	0.00569124	-0.075639	0.115018	25	25	25	62.3	62.3	62.3	47.463	0	323.31	18807000000	8650800000	10156000000	6	18	21	10	O00231	26S proteasome non-ATPase regulatory subunit 11
O95831	AIFM1	0.0619281	0.238283	0.150105	0.124702	21	21	21	39.6	39.6	39.6	66.9	0	311.31	19519000000	8476400000	11042000000	11	17	18	15	O95831	Apoptosis-inducing factor 1, mitochondrial
P13639	EEF2	0.0962671	0.0411274	0.0686973	0.0389897	62	62	61	73.3	73.3	72.1	95.337	0	323.31	219330000000	88762000000	130560000000	50	55	51	44	P13639	Elongation factor 2
P42224	STAT1	1.05416	0.700191	0.877177	0.250294	19	19	19	29.5	29.5	29.5	87.334	0	170.33	3168100000	1083000000	2085100000	8	12	8	12	P42224	Signal transducer and activator of transcription 1-alpha/beta
P49356	FNTB	-0.86553	-1.27029	-1.06791	0.286209	7	7	7	21.7	21.7	21.7	48.773	0	81.665	1345300000	683530000	661790000	3	5	6	3	P49356	Protein farnesyltransferase subunit beta
Q9GZZ9	UBA5	1.20439	1.00532	1.10486	0.140764	7	7	7	32.4	32.4	32.4	44.863	0	97.54	2310800000	946750000	1364000000	5	4	6	4	Q9GZZ9	Ubiquitin-like modifier-activating enzyme 5
O75694	NUP155	0.21711	0.202416	0.209763	0.0103902	59	59	59	51.8	51.8	51.8	155.2	0	323.31	28178000000	13204000000	14974000000	40	45	38	43	O75694	Nuclear pore complex protein Nup155
O00291	HIP1	4.3347	2.34716	3.34093	1.4054	25	25	24	29.3	29.3	28	116.22	0	183.76	1321500000	171680000	1149800000	13	17	4	7	O00291	Huntingtin-interacting protein 1
P26358	DNMT1	0.190744	-0.265736	-0.0374959	0.32278	78	78	78	55.7	55.7	55.7	183.16	0	323.31	22500000000	12622000000	9878100000	63	51	50	51	P26358	DNA (cytosine-5)-methyltransferase 1
O75362	ZNF217	0.778647		0.778647	#DIV/0!	4	4	4	6	6	6	115.27	0	8.6876	88781000	41506000	47275000	3	3	2	0	O75362	Zinc finger protein 217
Q9H089	LSG1	-0.498626	-0.82393	-0.661278	0.230025	6	6	6	10	10	10	75.225	0	6.5725	328090000	143880000	184210000	2	1	4	3	Q9H089	Large subunit GTPase 1 homolog
P27816	MAP4	1.03676	1.23998	1.13837	0.143698	55	55	55	60.7	60.7	60.7	121	0	323.31	20207000000	7589200000	12618000000	46	40	36	40	P27816	Microtubule-associated protein 4
Q96J01	THOC3	0.656576	0.59877	0.627673	0.040875	9	9	9	32.8	32.8	32.8	38.771	0	105.84	1518700000	477240000	1041500000	4	4	4	3	Q96J01	THO complex subunit 3
Q9H2V7	SPNS1				#DIV/0!	3	3	3	7.4	7.4	7.4	56.629	0	11.925	71227000	15419000	55808000	2	1	3	0	Q9H2V7	Protein spinster homolog 1
Q5VTR2	RNF20	0.520175	0.477932	0.499054	0.0298703	47	47	44	49.4	49.4	46.4	113.66	0	323.31	5397900000	2221100000	3176800000	25	29	15	19	Q5VTR2	E3 ubiquitin-protein ligase BRE1A
Q9UJX5	ANAPC4	0.391746	0.766962	0.579354	0.265318	8	8	8	15.7	15.7	15.7	92.115	0	51.564	573320000	263760000	309560000	3	4	3	5	Q9UJX5	Anaphase-promoting complex subunit 4
P09496	CLTA	0.649988	0.772416	0.711202	0.0865697	6	6	6	16.5	16.5	16.5	27.076	0	7.4652	2352700000	895480000	1457200000	2	3	4	3	P09496	Clathrin light chain A
Q8IXH7	NELFCD	-0.420789	-0.501101	-0.460945	0.0567892	12	12	12	29.2	29.2	29.2	66.246	0	184.07	1281900000	701290000	580610000	2	3	10	7	Q8IXH7	Negative elongation factor C/D
P39019	RPS19	-0.115352	0.0377222	-0.0388151	0.10824	13	13	13	61.4	61.4	61.4	16.06	0	43.067	17648000000	9864900000	7783000000	6	9	8	11	P39019	40S ribosomal protein S19
Q9H2M9	RAB3GAP2	0.51761	0.576235	0.546923	0.0414541	52	52	52	43.1	43.1	43.1	155.98	0	323.31	17785000000	7433300000	10351000000	37	32	40	37	Q9H2M9;P13994	Rab3 GTPase-activating protein non-catalytic subunit
Q99735	MGST2	0.0489912	0.227378	0.138185	0.126139	2	2	2	17.7	17.7	17.7	16.62	0	7.786	3914800000	1779800000	2135000000	1	2	1	2	Q99735	Microsomal glutathione S-transferase 2
P24390	KDELR1	-0.0728	0.104446	0.0158233	0.125332	4	4	4	27.8	27.8	27.8	24.542	0	113.45	3347300000	1384800000	1962400000	4	4	3	4	P24390;P33947	ER lumen protein-retaining receptor 1
O95167	NDUFA3	-0.152963	-0.191454	-0.172208	0.0272172	4	4	4	50	50	50	9.2787	0	56.956	2407700000	1293000000	1114700000	2	4	4	4	O95167	NADH dehydrogenase [ubiquinone] 1 alpha subcomplex subunit 3
Q9HCC0	MCCC2	1.0458	0.995222	1.02051	0.035764	21	21	21	49.9	49.9	49.9	61.332	0	323.31	9965600000	2669600000	7296000000	8	15	10	15	Q9HCC0	Methylcrotonoyl-CoA carboxylase beta chain, mitochondrial
P39687	ANP32A	0.136729	0.0990844	0.117907	0.0266188	15	15	11	34.9	34.9	30.9	28.585	0	323.31	70150000000	34160000000	35990000000	7	12	9	10	P39687;O43423	Acidic leucine-rich nuclear phosphoprotein 32 family member A
Q9C0D5	TANC1	-0.407979	-1.34104	-0.874511	0.659774	51	51	51	32.5	32.5	32.5	202.22	0	214.89	2363400000	1670500000	692930000	28	14	29	25	Q9C0D5	Protein TANC1
O43776	NARS	-0.121015	-0.269463	-0.195239	0.104969	21	21	21	45.3	45.3	45.3	62.942	0	323.31	32063000000	15421000000	16643000000	12	19	18	18	O43776	Asparagine--tRNA ligase, cytoplasmic
P18206	VCL	0.753477	0.811803	0.78264	0.0412427	69	69	69	64.6	64.6	64.6	123.8	0	323.31	43856000000	17600000000	26256000000	56	49	37	53	P18206	Vinculin
Q05048	CSTF1	0.00975739	-0.616815	-0.303529	0.443054	6	6	6	21.8	21.8	21.8	48.357	0	323.31	2051400000	983270000	1068200000	3	4	4	3	Q05048	Cleavage stimulation factor subunit 1
Q9BQS8	FYCO1	1.59367	0.914362	1.25402	0.480343	14	14	14	11.9	11.9	11.9	166.98	0	83.856	519640000	246390000	273250000	8	10	4	6	Q9BQS8	FYVE and coiled-coil domain-containing protein 1
Q9H9Q2	COPS7B	0.438522	0.365613	0.402067	0.0515544	5	5	5	25	25	25	29.622	0	45.775	1848900000	661710000	1187200000	3	5	5	3	Q9H9Q2	COP9 signalosome complex subunit 7b
Q5T2E6	C10orf76	0.560842		0.560842	#DIV/0!	6	6	6	12	12	12	78.71	0	94.468	391300000	143410000	247890000	3	3	3	0	Q5T2E6	UPF0668 protein C10orf76
Q9NWH9	SLTM	-0.658938	-0.635404	-0.647171	0.0166411	19	19	19	20.6	20.6	20.6	117.15	0	290.06	3849600000	2224200000	1625400000	14	11	11	12	Q9NWH9	SAFB-like transcription modulator
P51991	HNRNPA3	0.53068	0.215106	0.372893	0.223145	24	24	24	48.4	48.4	48.4	39.594	0	323.31	30466000000	14043000000	16423000000	11	18	23	19	P51991	Heterogeneous nuclear ribonucleoprotein A3
O00442	RTCA	0.929573	0.849281	0.889427	0.056775	12	12	12	45.4	45.4	45.4	39.336	0	176.3	6524500000	2310300000	4214200000	8	7	11	7	O00442	RNA 3-terminal phosphate cyclase
Q96QK1	VPS35	-0.0844638	-0.106869	-0.0956662	0.0158429	31	31	31	46.7	46.7	46.7	91.706	0	323.31	23415000000	10462000000	12953000000	19	25	18	15	Q96QK1	Vacuolar protein sorting-associated protein 35
P09132	SRP19	0.701487	1.10574	0.903615	0.28585	7	7	7	55.6	55.6	55.6	16.156	0	273.36	3266300000	1282500000	1983800000	5	6	6	4	P09132	Signal recognition particle 19 kDa protein
Q9NTM9	CUTC	-0.0848847	-0.00695025	-0.0459175	0.055108	4	4	4	22.7	22.7	22.7	29.341	0	75.359	578260000	279390000	298870000	2	2	2	2	Q9NTM9	Copper homeostasis protein cutC homolog
Q13322	GRB10				#DIV/0!	4	4	4	10.3	10.3	10.3	67.231	0	9.4847	90416000	58043000	32373000	2	0	2	0	Q13322	Growth factor receptor-bound protein 10
Q13347	EIF3I	0.351689	0.222545	0.287117	0.0913186	17	17	17	75.7	75.7	75.7	36.501	0	323.31	14097000000	6140400000	7957000000	10	7	17	9	Q13347	Eukaryotic translation initiation factor 3 subunit I
Q96IU4	ABHD14B	0.46681	0.31053	0.38867	0.110507	10	10	10	63.3	63.3	63.3	22.345	0	177.46	13674000000	4722800000	8951200000	3	7	7	10	Q96IU4	Alpha/beta hydrolase domain-containing protein 14B
P04899	GNAI2	0.496229	0.247686	0.371957	0.175746	19	19	10	66.8	66.8	42	40.45	0	323.31	11432000000	4560600000	6871500000	11	15	17	7	P04899;P11488;P09471;A8MTJ3;P38405	Guanine nucleotide-binding protein G(i) subunit alpha-2
Q9NZJ7	MTCH1	1.75038	0.364873	1.05763	0.979701	6	6	6	17.5	17.5	17.5	41.544	0	18.04	1385200000	374100000	1011100000	3	5	5	3	Q9NZJ7	Mitochondrial carrier homolog 1
Q6ULP2	AFTPH				#DIV/0!	5	5	5	8.5	8.5	8.5	102.11	0	34.36	76815000	47938000	28877000	5	0	0	0	Q6ULP2	Aftiphilin
O95169	NDUFB8	0.0717013	0.106593	0.0891473	0.0246722	5	5	5	30.1	30.1	30.1	21.766	0	39.658	1987700000	951200000	1036500000	3	5	3	3	O95169	NADH dehydrogenase [ubiquinone] 1 beta subcomplex subunit 8, mitochondrial
O43181	NDUFS4	-0.169441		-0.169441	#DIV/0!	4	4	4	34.9	34.9	34.9	20.108	0	12.77	2353300000	1127900000	1225400000	2	1	3	1	O43181	NADH dehydrogenase [ubiquinone] iron-sulfur protein 4, mitochondrial
Q15006	EMC2	0.619485		0.619485	#DIV/0!	9	9	9	41.4	41.4	41.4	34.833	0	136.9	2078500000	574690000	1503800000	4	5	7	1	Q15006	ER membrane protein complex subunit 2
Q9H9B4	SFXN1	0.134895	0.0744653	0.10468	0.0427303	14	13	13	47.8	41.9	41.9	35.619	0	61.904	10715000000	3277200000	7438100000	3	7	11	4	Q9H9B4	Sideroflexin-1
Q9Y679	AUP1	-0.303488	-0.079075	-0.191282	0.158684	4	4	4	12.2	12.2	12.2	45.786	0	14.752	356490000	159780000	196720000	2	1	2	2	Q9Y679	Ancient ubiquitous protein 1
O43747	AP1G1	0.683974	0.542248	0.613111	0.100215	21	21	21	30.2	30.2	30.2	91.35	0	128.82	10001000000	3823300000	6177300000	13	13	12	14	O43747	AP-1 complex subunit gamma-1
Q7Z478	DHX29	0.244081	0.314809	0.279445	0.0500122	51	51	51	44.5	44.5	44.5	155.23	0	323.31	7069700000	2916000000	4153600000	27	35	31	27	Q7Z478	ATP-dependent RNA helicase DHX29
Q8TAQ2	SMARCC2	0.467397	0.446226	0.456812	0.0149702	57	46	46	50.7	43.7	43.7	132.88	0	323.31	17635000000	8116400000	9518900000	43	34	46	43	Q8TAQ2	SWI/SNF complex subunit SMARCC2
P78371	CCT2	0.354671	0.373588	0.364129	0.0133763	40	40	40	81.3	81.3	81.3	57.488	0	323.31	97495000000	33935000000	63561000000	18	33	29	33	P78371	T-complex protein 1 subunit beta
P62750	RPL23A	0.00668722	0.128731	0.067709	0.086298	16	16	16	54.5	54.5	54.5	17.695	0	128.83	27339000000	14691000000	12648000000	2	12	11	15	P62750	60S ribosomal protein L23a
P62308;A8MWD9	SNRPG;SNRPGP15	-0.101487	-0.231327	-0.166407	0.0918107	5	5	5	42.1	42.1	42.1	8.496	0	8.5183	14732000000	7285800000	7446000000	2	4	3	5	P62308;A8MWD9	Small nuclear ribonucleoprotein G;Putative small nuclear ribonucleoprotein G-like protein 15
P42345	MTOR	-0.111096	0.115601	0.00225233	0.160299	89	89	89	44.3	44.3	44.3	288.89	0	323.31	11298000000	5787800000	5510600000	63	65	68	56	P42345	Serine/threonine-protein kinase mTOR
P63220	RPS21	0.189035	0.0600435	0.124539	0.0912108	12	12	12	92.8	92.8	92.8	9.1113	0	152.33	22243000000	10888000000	11355000000	4	11	9	9	P63220	40S ribosomal protein S21
P04406	GAPDH	0.836811	0.765683	0.801247	0.0502951	33	33	32	92.2	92.2	92.2	36.053	0	323.31	581230000000	191480000000	389760000000	26	27	28	25	P04406	Glyceraldehyde-3-phosphate dehydrogenase
Q92556	ELMO1	-0.973941	-0.683023	-0.828482	0.20571	23	23	18	41.7	41.7	36.6	83.829	0	163.73	6122500000	3351700000	2770800000	15	14	14	11	Q92556	Engulfment and cell motility protein 1
O15212	PFDN6	0.480854	0.484973	0.482913	0.00291257	11	11	11	56.6	56.6	56.6	14.582	0	128.47	3610700000	1460100000	2150600000	4	9	5	6	O15212	Prefoldin subunit 6
P46736	BRCC3	1.02894	1.02255	1.02575	0.00451841	6	6	6	25	25	25	36.072	0	47.661	1827800000	462270000	1365600000	1	4	4	4	P46736	Lys-63-specific deubiquitinase BRCC36
A9UHW6	MIF4GD	-0.233823		-0.233823	#DIV/0!	6	6	6	34.2	34.2	34.2	25.423	0	24.384	293220000	98891000	194330000	0	5	3	1	A9UHW6	MIF4G domain-containing protein
Q9HB40	SCPEP1	0.99915	0.96496	0.982055	0.024176	9	9	9	24.3	24.3	24.3	50.83	0	52.959	2152800000	642780000	1510000000	3	7	8	6	Q9HB40	Retinoid-inducible serine carboxypeptidase
P52306	RAP1GDS1	0.0788981	-0.0648196	0.00703924	0.101624	10	10	10	23.1	23.1	23.1	66.316	0	201	4020500000	1731500000	2288900000	4	10	6	5	P52306	Rap1 GTPase-GDP dissociation stimulator 1
P60900	PSMA6	0.372145	0.504149	0.438147	0.0933409	17	17	17	70.3	70.3	70.3	27.399	0	323.31	32755000000	15364000000	17391000000	8	10	12	12	P60900	Proteasome subunit alpha type-6
Q53FT3	C11orf73	-1.27865	-0.811758	-1.0452	0.330142	5	5	5	27.4	27.4	27.4	21.627	0	16.855	1935400000	1157900000	777520000	1	3	3	5	Q53FT3	Protein Hikeshi
Q16719	KYNU	1.12237	1.11218	1.11727	0.00720542	8	8	8	24.5	24.5	24.5	52.351	0	20.717	2230900000	708480000	1522400000	4	6	5	3	Q16719	Kynureninase
Q9UKM7	MAN1B1	0.356082	0.601855	0.478968	0.173788	6	6	6	11.7	11.7	11.7	79.579	0	18.272	480570000	203290000	277280000	3	2	3	4	Q9UKM7;REV__O60290	Endoplasmic reticulum mannosyl-oligosaccharide 1,2-alpha-mannosidase
Q9Y678	COPG1	0.87452	0.843407	0.858964	0.0220002	39	39	36	58.2	58.2	54.5	97.717	0	323.31	29028000000	11029000000	17999000000	25	29	22	26	Q9Y678	Coatomer subunit gamma-1
P36405	ARL3	0.749619	0.978421	0.86402	0.161787	7	7	7	40.1	40.1	40.1	20.455	0	147.2	1701500000	651350000	1050100000	3	6	5	4	P36405	ADP-ribosylation factor-like protein 3
Q9BYT8	NLN	1.56758	1.57386	1.57072	0.00444063	27	27	27	43.2	43.2	43.2	80.651	0	323.31	5764900000	1473700000	4291200000	14	21	10	7	Q9BYT8	Neurolysin, mitochondrial
Q9BQE3	TUBA1C	-1.14251	-0.861725	-1.00212	0.198545	38	2	2	80.4	9.1	9.1	49.895	0	180.52	5814200000	3275100000	2539100000	27	30	33	33	Q9BQE3	Tubulin alpha-1C chain
P49721	PSMB2	0.455905	0.575714	0.515809	0.0847178	18	18	18	88.1	88.1	88.1	22.836	0	323.31	29987000000	10322000000	19666000000	5	16	13	16	P49721	Proteasome subunit beta type-2
Q6ZS11	RINL	0.766972		0.766972	#DIV/0!	3	3	3	6.9	6.9	6.9	62.466	0	39.107	195840000	88312000	107530000	2	1	3	2	Q6ZS11	Ras and Rab interactor-like protein
Q13618	CUL3	0.628065	0.505646	0.566855	0.0865633	21	21	21	34.5	34.5	34.5	88.929	0	176.47	3537000000	1214500000	2322400000	7	16	7	9	Q13618	Cullin-3
Q9ULC4	MCTS1	-0.0904511	-0.0398424	-0.0651468	0.0357858	9	9	9	68	68	68	20.555	0	68.877	2551900000	1240400000	1311500000	4	4	7	6	Q9ULC4	Malignant T-cell-amplified sequence 1
P52788	SMS	-1.79522	-1.41017	-1.60269	0.272271	16	16	16	58.5	58.5	58.5	41.268	0	323.31	5247900000	3481400000	1766600000	11	5	10	9	P52788	Spermine synthase
Q5RI15	COX20	0.610998	0.78764	0.699319	0.124905	5	5	5	33.9	33.9	33.9	13.291	0	22.145	1720100000	719570000	1000500000	1	3	3	3	Q5RI15	Cytochrome c oxidase protein 20 homolog
P22234	PAICS	-0.655168	-0.789068	-0.722118	0.0946816	28	28	28	67.3	67.3	67.3	47.079	0	323.31	61783000000	29782000000	32001000000	13	24	25	18	P22234	Multifunctional protein ADE2;Phosphoribosylaminoimidazole-succinocarboxamide synthase;Phosphoribosylaminoimidazole carboxylase
Q5T1M5	FKBP15	0.545055	0.487038	0.516047	0.0410242	26	26	26	31.9	31.9	31.9	133.63	0	323.31	4612700000	2002700000	2609900000	21	21	22	14	Q5T1M5	FK506-binding protein 15
Q9NPA8	ENY2	-0.845698	-0.905301	-0.8755	0.0421457	6	6	6	48.5	48.5	48.5	11.528	0	47	1951600000	1213000000	738640000	1	5	5	4	Q9NPA8	Transcription and mRNA export factor ENY2
Q14573	ITPR3	0.102944		0.102944	#DIV/0!	28	20	20	11.2	8.9	8.9	304.1	0	24.483	2009400000	282040000	1727400000	9	21	12	6	Q14573	Inositol 1,4,5-trisphosphate receptor type 3
P43034	PAFAH1B1	-0.81585	-0.806335	-0.811092	0.00672812	16	16	16	53.2	53.2	53.2	46.637	0	323.31	3122200000	1518100000	1604100000	2	9	15	3	P43034	Platelet-activating factor acetylhydrolase IB subunit alpha
O14656	TOR1A	1.68093	1.72402	1.70247	0.0304692	10	10	10	29.5	29.5	29.5	37.808	0	23.256	1991100000	447590000	1543500000	6	7	8	4	O14656	Torsin-1A
P11216	PYGB	0.984437	0.672122	0.82828	0.22084	34	26	24	46.4	36.5	34	96.695	0	232.45	4765900000	1645200000	3120700000	18	25	17	14	P11216	Glycogen phosphorylase, brain form
Q13405	MRPL49	-0.499635	-0.740816	-0.620226	0.170541	7	7	7	51.2	51.2	51.2	19.198	0	38.473	1195200000	622350000	572900000	2	3	5	3	Q13405	39S ribosomal protein L49, mitochondrial
Q9Y2T2	AP3M1	1.21402	0.774385	0.994201	0.310869	15	15	13	56.5	56.5	51.7	46.939	0	167.27	2304500000	782660000	1521900000	1	8	13	6	Q9Y2T2	AP-3 complex subunit mu-1
Q04637	EIF4G1	0.554851	0.551803	0.553327	0.00215526	74	74	69	49	49	45.9	175.49	0	323.31	71401000000	31339000000	40062000000	65	55	58	55	Q04637;REV__Q8NEG2	Eukaryotic translation initiation factor 4 gamma 1
O00268	TAF4	1.73516		1.73516	#DIV/0!	9	9	9	15.9	15.9	15.9	110.11	0	73.473	276320000	82076000	194250000	4	4	6	0	O00268;Q92750	Transcription initiation factor TFIID subunit 4
Q13526	PIN1	-0.833974	-0.519978	-0.676976	0.222029	10	10	10	70.6	70.6	70.6	18.243	0	323.31	4106100000	2622800000	1483200000	4	6	6	6	Q13526;O15428	Peptidyl-prolyl cis-trans isomerase NIMA-interacting 1
Q9NX55	HYPK	-0.044854	1.93078	0.942963	1.39698	7	7	7	51.9	51.9	51.9	14.665	0	86.542	471380000	180240000	291140000	3	3	5	3	Q9NX55	Huntingtin-interacting protein K
O14874	BCKDK	-1.14735		-1.14735	#DIV/0!	3	3	3	14.6	14.6	14.6	46.36	0	12.136	221560000	92073000	129480000	1	2	2	0	O14874	[3-methyl-2-oxobutanoate dehydrogenase [lipoamide]] kinase, mitochondrial
Q9BT73	PSMG3	-0.806998	-0.289615	-0.548306	0.365845	5	5	5	58.2	58.2	58.2	13.104	0	74.308	1567300000	903050000	664230000	2	2	5	3	Q9BT73	Proteasome assembly chaperone 3
Q969X6	CIRH1A	-0.352719	-0.0259619	-0.18934	0.231052	11	11	11	25.1	25.1	25.1	76.889	0	64.22	1150200000	737480000	412690000	9	4	7	4	Q969X6	Cirhin
P48634	PRRC2A	0.27606	0.0403353	0.158198	0.166683	55	53	53	34.3	33.4	33.4	228.86	0	323.31	9660400000	4940700000	4719700000	39	39	30	34	P48634	Protein PRRC2A
Q9NPD3	EXOSC4	-0.259056	-0.189163	-0.224109	0.0494218	8	8	8	40.4	40.4	40.4	26.383	0	231.83	3624200000	2095700000	1528500000	3	4	7	6	Q9NPD3	Exosome complex component RRP41
O43324	EEF1E1	-1.13223	-0.632951	-0.882591	0.353044	9	9	9	58	58	58	19.81	0	106.46	11575000000	7231800000	4343500000	4	5	6	9	O43324	Eukaryotic translation elongation factor 1 epsilon-1
P61421	ATP6V0D1	1.24622	0.400186	0.823202	0.598236	5	5	5	26.5	26.5	26.5	40.329	0	246.18	1378400000	331490000	1046900000	4	4	3	1	P61421	V-type proton ATPase subunit d 1
P78347	GTF2I	0.253421	0.253081	0.253251	0.000240416	60	60	57	58	58	54.9	112.42	0	323.31	33405000000	16292000000	17113000000	47	43	41	40	P78347	General transcription factor II-I
Q9Y3I0	RTCB	-0.467297	-0.281444	-0.374371	0.131418	14	14	14	44	44	44	55.21	0	122.42	6720100000	3298700000	3421400000	3	10	7	6	Q9Y3I0	tRNA-splicing ligase RtcB homolog
Q96T51	RUFY1	0.685527	0.804432	0.744979	0.0840785	20	20	20	37.7	37.7	37.7	79.817	0	103.07	1757400000	645120000	1112300000	7	13	8	10	Q96T51	RUN and FYVE domain-containing protein 1
Q9Y315	DERA	0.667849	0.575192	0.62152	0.0655184	15	15	15	61.6	61.6	61.6	35.23	0	323.31	4935300000	1790500000	3144800000	10	10	12	6	Q9Y315	Deoxyribose-phosphate aldolase
Q12800	TFCP2	0.170072	-0.059659	0.0552064	0.162444	8	8	7	21.3	21.3	17.7	57.255	0	287.2	1769800000	1027000000	742740000	3	2	7	5	Q12800	Alpha-globin transcription factor CP2
Q9UI30	TRMT112	0.62056	0.912978	0.766769	0.206771	7	7	7	77.6	77.6	77.6	14.199	0	74.207	4741200000	1538500000	3202700000	6	7	7	5	Q9UI30	Multifunctional methyltransferase subunit TRM112-like protein
O00505	KPNA3	-0.137481	-0.511176	-0.324328	0.264242	12	8	8	34.4	27.3	27.3	57.81	0	145.34	4819400000	2468600000	2350800000	7	9	9	9	O00505	Importin subunit alpha-4
Q93052	LPP		3.18533	3.18533	#DIV/0!	9	9	9	16.7	16.7	16.7	65.746	0	52.1	402180000	58564000	343620000	1	9	1	3	Q93052	Lipoma-preferred partner
P43686	PSMC4	-0.0816667	-0.0625286	-0.0720977	0.0135327	22	22	22	58.9	58.9	58.9	47.366	0	323.31	14372000000	6973600000	7398200000	9	12	21	11	P43686	26S protease regulatory subunit 6B
P62195	PSMC5	0.074122	-0.118319	-0.0220984	0.136076	27	27	26	71.4	71.4	68.5	45.626	0	323.31	16098000000	7922100000	8175600000	12	23	20	12	P62195	26S protease regulatory subunit 8
P20290	BTF3	0.00605324	0.660636	0.333345	0.46286	10	10	10	66	66	66	22.168	0	323.31	10410000000	4306600000	6103300000	7	6	9	6	P20290	Transcription factor BTF3
Q9Y3A3	MOB4	0.505445	0.414334	0.45989	0.0644252	7	7	7	45.3	45.3	45.3	26.032	0	141.23	1885300000	754400000	1130900000	3	5	4	6	Q9Y3A3	MOB-like protein phocein
Q06265	EXOSC9	-0.991617	-1.11528	-1.05345	0.0874429	6	6	6	17.5	17.5	17.5	48.948	0	21.213	1588700000	805310000	783390000	3	4	5	5	Q06265	Exosome complex component RRP45
Q09472	EP300	0.153191	0.227861	0.190526	0.0527997	34	34	19	16.5	16.5	11.2	264.16	0	77.549	1785200000	832680000	952540000	26	23	15	8	Q09472	Histone acetyltransferase p300
Q8N8Y2	ATP6V0D2				#DIV/0!	3	3	3	9.1	9.1	9.1	40.426	0	47.987	917040000	227750000	689290000	3	2	1	1	Q8N8Y2	V-type proton ATPase subunit d 2
Q7Z3J2	C16orf62	0.00564974	-0.313385	-0.153868	0.225592	17	17	17	24.6	24.6	24.6	109.56	0	61.005	949720000	548380000	401340000	9	3	10	4	Q7Z3J2	UPF0505 protein C16orf62
P39748	FEN1	-0.480908	-0.820236	-0.650572	0.239941	15	14	14	51.6	51.6	51.6	42.592	0	323.31	11028000000	5835000000	5192600000	7	11	12	4	P39748	Flap endonuclease 1
Q9BVK2	ALG8	1.34552	1.26661	1.30606	0.0557978	4	4	4	8.9	8.9	8.9	60.087	0	11.223	976230000	323820000	652400000	4	3	2	2	Q9BVK2	Probable dolichyl pyrophosphate Glc1Man9GlcNAc2 alpha-1,3-glucosyltransferase
O95573	ACSL3	0.0220598	0.152715	0.0873876	0.0923872	26	24	24	46.2	42.2	42.2	80.419	0	158.44	8075100000	3615800000	4459300000	15	20	18	13	O95573	Long-chain-fatty-acid--CoA ligase 3
Q8IVD9	NUDCD3	1.37129	0.941162	1.15623	0.304146	3	3	3	7.5	7.5	7.5	40.822	0.0035977	1.8106	490600000	140930000	349660000	1	2	2	2	Q8IVD9	NudC domain-containing protein 3
P63010	AP2B1	-0.586604	-0.82393	-0.705267	0.167815	43	25	25	55.3	37.6	37.6	104.55	0	230.67	7594100000	4245600000	3348400000	28	30	23	21	P63010	AP-2 complex subunit beta
P05161	ISG15	-0.72674	-0.440068	-0.583404	0.202708	5	5	5	37	37	37	17.887	0	67.312	517250000	244290000	272970000	2	4	5	3	P05161	Ubiquitin-like protein ISG15
Q96RT1	ERBB2IP	-0.938527	-0.977844	-0.958186	0.0278013	15	15	15	13.2	13.2	13.2	158.3	0	17.968	893590000	462770000	430830000	10	6	6	1	Q96RT1;Q96NW7	Protein LAP2
P15586	GNS	-0.405408	-0.43947	-0.422439	0.0240855	14	14	14	31	31	31	62.081	0	123.82	9027200000	3928300000	5098900000	11	10	11	7	P15586	N-acetylglucosamine-6-sulfatase
Q9H6K4	OPA3		0.242433	0.242433	#DIV/0!	3	3	3	13.4	13.4	13.4	19.996	0	2.9888	902970000	387170000	515810000	1	2	1	3	Q9H6K4	Optic atrophy 3 protein
P46109	CRKL	1.81774	0.407708	1.11272	0.997043	10	10	10	46.9	46.9	46.9	33.777	0	87.148	3754900000	1366900000	2388000000	4	6	9	6	P46109	Crk-like protein
Q9Y5M8	SRPRB	0.893755	1.03209	0.962924	0.0978176	13	13	13	53.5	53.5	53.5	29.702	0	312.06	10796000000	4221900000	6573800000	6	10	9	7	Q9Y5M8	Signal recognition particle receptor subunit beta
Q8NI27	THOC2	0.541824	0.457049	0.499437	0.059945	58	58	58	41.1	41.1	41.1	182.77	0	323.31	23455000000	9603300000	13852000000	46	46	39	47	Q8NI27	THO complex subunit 2
P00746	CFD	3.73198	1.06409	2.39803	1.88648	8	8	8	46.6	46.6	46.6	27.033	0	47.739	1541200000	167060000	1374100000	3	6	5	2	P00746	Complement factor D
Q6UW68	TMEM205	1.00044	0.631632	0.816037	0.260787	4	4	4	27	27	27	21.198	0	51.274	5974200000	1754200000	4220000000	4	4	4	4	Q6UW68	Transmembrane protein 205
Q9NUJ1	ABHD10	-0.0493884	-0.0853104	-0.0673494	0.0254007	12	12	12	53.9	53.9	53.9	33.932	0	150.15	8287300000	3649400000	4637900000	5	9	8	7	Q9NUJ1	Mycophenolic acid acyl-glucuronide esterase, mitochondrial
Q00325	SLC25A3	0.293699	0.238922	0.26631	0.0387332	22	22	22	52.2	52.2	52.2	40.094	0	151.84	65627000000	23539000000	42088000000	14	19	16	17	Q00325	Phosphate carrier protein, mitochondrial
Q5RKV6	EXOSC6		-0.463038	-0.463038	#DIV/0!	4	4	4	19.5	19.5	19.5	28.235	0	32.794	1551200000	769130000	782080000	2	3	3	1	Q5RKV6	Exosome complex component MTR3
P24534	EEF1B2	0.269811	0.522567	0.396189	0.178725	13	9	9	68	58.7	58.7	24.763	0	323.31	34602000000	13642000000	20960000000	4	10	8	8	P24534	Elongation factor 1-beta
O15269	SPTLC1	0.0117692	-0.280557	-0.134394	0.206706	6	6	6	18.2	18.2	18.2	52.743	0	147.98	1630300000	781580000	848770000	2	4	5	3	O15269	Serine palmitoyltransferase 1
Q92979	EMG1	0.644963	0.618591	0.631777	0.0186478	15	15	15	75	75	75	26.72	0	77.019	6843100000	3092100000	3751000000	8	7	14	14	Q92979	Ribosomal RNA small subunit methyltransferase NEP1
Q96CW1	AP2M1	-0.558778	-0.796058	-0.677418	0.167782	17	17	17	44.8	44.8	44.8	49.654	0	108.88	4054900000	2224900000	1830000000	6	6	14	7	Q96CW1	AP-2 complex subunit mu
Q06187	BTK	-0.77128	0.0448669	-0.363207	0.577103	19	18	18	34	32.8	32.8	76.28	0	76.748	1215300000	445070000	770260000	5	13	6	6	Q06187	Tyrosine-protein kinase BTK
P35573	AGL	-0.102614	-0.272587	-0.1876	0.120189	64	64	64	51.1	51.1	51.1	174.76	0	323.31	16496000000	7890700000	8605100000	43	43	45	44	P35573	Glycogen debranching enzyme;4-alpha-glucanotransferase;Amylo-alpha-1,6-glucosidase
P27708	CAD	0.300186	0.373882	0.337034	0.0521109	119	119	116	73.3	73.3	72.2	242.98	0	323.31	100350000000	48507000000	51846000000	104	90	100	98	P27708	CAD protein;Glutamine-dependent carbamoyl-phosphate synthase;Aspartate carbamoyltransferase;Dihydroorotase
P55786	NPEPPS	-0.145739	-0.145212	-0.145475	0.000372645	40	40	40	50.5	50.5	50.5	103.28	0	323.31	37798000000	17390000000	20408000000	29	33	20	18	P55786;A6NEC2	Puromycin-sensitive aminopeptidase
P25705	ATP5A1	0.530255	0.222706	0.376481	0.21747	34	34	34	63.7	63.7	63.7	59.75	0	323.31	163870000000	52431000000	111440000000	25	29	26	18	P25705	ATP synthase subunit alpha, mitochondrial
Q9Y4A5	TRRAP	-0.104124	-0.0577754	-0.0809497	0.0327734	181	181	181	57.8	57.8	57.8	437.6	0	323.31	16324000000	8786200000	7537300000	116	106	114	134	Q9Y4A5	Transformation/transcription domain-associated protein
Q9Y6W5	WASF2	0.249591	0.221899	0.235745	0.0195812	7	7	7	17.1	17.1	17.1	54.283	0	107.21	1373200000	562890000	810290000	2	5	3	2	Q9Y6W5	Wiskott-Aldrich syndrome protein family member 2
O15254	ACOX3	0.943538		0.943538	#DIV/0!	12	12	12	25.1	25.1	25.1	77.628	0	30.399	1202300000	794480000	407790000	7	6	7	2	O15254	Peroxisomal acyl-coenzyme A oxidase 3
O15530;Q6A1A2	PDPK1;PDPK2P	1.42137	1.53903	1.4802	0.0831982	4	4	4	10.4	10.4	10.4	63.151	0	10.541	333280000	104370000	228910000	2	1	3	3	O15530;Q6A1A2	3-phosphoinositide-dependent protein kinase 1;Putative 3-phosphoinositide-dependent protein kinase 2
Q8NCN5	PDPR	1.4403	1.34409	1.3922	0.0680307	16	16	16	26.2	26.2	26.2	99.363	0	69.213	2623500000	791800000	1831700000	8	12	7	5	Q8NCN5	Pyruvate dehydrogenase phosphatase regulatory subunit, mitochondrial
Q8WX92	NELFB	-0.170036	-0.277578	-0.223807	0.0760437	14	14	14	27.1	27.1	27.1	65.697	0	90.821	3967700000	2135200000	1832500000	9	5	10	12	Q8WX92	Negative elongation factor B
Q9UKI8	TLK1	-0.00594205	-0.00650287	-0.00622246	0.00039656	6	4	4	8.9	6.1	6.1	86.699	0	13.926	171380000	99799000	71584000	4	2	4	4	Q9UKI8	Serine/threonine-protein kinase tousled-like 1
Q14289	PTK2B	0.563204	1.11764	0.840424	0.392045	24	24	24	27.6	27.6	27.6	115.87	0	71.281	1464200000	428440000	1035700000	14	17	8	4	Q14289	Protein-tyrosine kinase 2-beta
O95466	FMNL1	-1.82485	-1.61741	-1.72113	0.146682	40	40	35	40.4	40.4	36.9	121.85	0	309.67	9422200000	5974800000	3447400000	23	18	24	33	O95466	Formin-like protein 1
P49590	HARS2	-0.696456		-0.696456	#DIV/0!	9	3	3	20.6	9.1	9.1	56.888	0	6.9435	217690000	111560000	106130000	5	7	5	2	P49590	Probable histidine--tRNA ligase, mitochondrial
Q9H944	MED20	-0.294494	0.115308	-0.0895928	0.289774	6	6	6	42.9	42.9	42.9	23.222	0	27.639	828300000	388630000	439680000	1	2	4	4	Q9H944	Mediator of RNA polymerase II transcription subunit 20
P12270	TPR	-0.340605	-0.0287567	-0.184681	0.22051	129	129	129	51.4	51.4	51.4	267.29	0	323.31	84339000000	44378000000	39962000000	109	113	100	104	P12270	Nucleoprotein TPR
P10619	CTSA	1.34076	2.06202	1.70139	0.510008	6	6	6	15.8	15.8	15.8	54.465	0	55.58	3394800000	1012900000	2381900000	4	5	2	5	P10619	Lysosomal protective protein;Lysosomal protective protein 32 kDa chain;Lysosomal protective protein 20 kDa chain
Q9NUW8	TDP1	0.60396		0.60396	#DIV/0!	6	6	6	14.8	14.8	14.8	68.42	0	13.808	458010000	216730000	241290000	4	2	5	0	Q9NUW8	Tyrosyl-DNA phosphodiesterase 1
Q8TEU7	RAPGEF6	0.908808		0.908808	#DIV/0!	28	24	24	25.7	23.1	23.1	179.42	0	90.48	758160000	325160000	433000000	22	15	6	4	Q8TEU7	Rap guanine nucleotide exchange factor 6
Q07812	BAX	-0.533407	-0.385011	-0.459209	0.104932	10	10	10	58.9	58.9	58.9	21.184	0	90.835	5842700000	2750900000	3091800000	5	8	8	9	Q07812	Apoptosis regulator BAX
Q9UHB9	SRP68	0.491602	0.334986	0.413294	0.110744	27	27	27	48.2	48.2	48.2	70.729	0	323.31	12080000000	5327700000	6752000000	14	18	13	16	Q9UHB9	Signal recognition particle subunit SRP68
P09012	SNRPA	-0.324885	-0.183708	-0.254297	0.0998272	15	15	12	48.2	48.2	47.5	31.279	0	323.31	10269000000	5480300000	4789000000	3	6	13	11	P09012	U1 small nuclear ribonucleoprotein A
Q99543	DNAJC2	1.01149	0.60224	0.806866	0.289383	19	19	19	34.9	34.9	34.9	71.996	0	120	2032100000	725030000	1307100000	8	11	7	11	Q99543	DnaJ homolog subfamily C member 2;DnaJ homolog subfamily C member 2, N-terminally processed
P51116	FXR2				#DIV/0!	5	3	3	10	7.6	7.6	74.222	0	21.87	97106000	73908000	23198000	2	2	3	1	P51116	Fragile X mental retardation syndrome-related protein 2
Q9Y619	SLC25A15	0.445228	0.316945	0.381087	0.0907098	9	9	9	31.6	31.6	31.6	32.736	0	89.393	3294300000	1163900000	2130400000	4	8	4	4	Q9Y619	Mitochondrial ornithine transporter 1
Q6YN16	HSDL2	0.607347	0.303168	0.455258	0.215087	15	15	15	48.8	48.8	48.8	45.394	0	85.585	3657900000	1544100000	2113700000	5	8	13	4	Q6YN16	Hydroxysteroid dehydrogenase-like protein 2
Q01804	OTUD4	0.430439	0.181212	0.305825	0.17623	16	16	16	21.6	21.6	21.6	124.04	0	73.07	1068800000	462710000	606060000	14	4	8	6	Q01804	OTU domain-containing protein 4
Q99807	COQ7	1.32933		1.32933	#DIV/0!	7	7	7	42.4	42.4	42.4	24.277	0	20.556	630600000	167620000	462980000	2	6	3	1	Q99807	5-demethoxyubiquinone hydroxylase, mitochondrial
Q9Y6A9	SPCS1	0.329078	0.290826	0.309952	0.0270482	3	3	3	31.4	31.4	31.4	11.805	0	18.608	2769500000	980780000	1788700000	3	3	3	2	Q9Y6A9	Signal peptidase complex subunit 1
O00142	TK2		0.766381	0.766381	#DIV/0!	4	4	4	22.6	22.6	22.6	31.004	0	9.2085	140150000	70802000	69352000	2	1	1	2	O00142	Thymidine kinase 2, mitochondrial
Q13217	DNAJC3	0.467251	0.748728	0.607989	0.199034	14	14	14	40.3	40.3	40.3	57.579	0	165.69	2186000000	777880000	1408100000	4	10	4	5	Q13217	DnaJ homolog subfamily C member 3
P78330	PSPH	0.485219	0.50115	0.493185	0.0112649	14	14	14	60	60	60	25.007	0	168.03	9934700000	4623700000	5310900000	6	4	11	12	P78330	Phosphoserine phosphatase
Q29RF7	PDS5A	-0.167213	-0.0988325	-0.133023	0.0483523	70	70	63	53	53	48.9	150.83	0	323.31	22526000000	11510000000	11015000000	51	49	44	44	Q29RF7	Sister chromatid cohesion protein PDS5 homolog A
Q9P2R7	SUCLA2	0.388213		0.388213	#DIV/0!	18	18	18	41.9	41.9	41.9	50.317	0	146	4205800000	1441700000	2764100000	6	9	14	3	Q9P2R7	Succinyl-CoA ligase [ADP-forming] subunit beta, mitochondrial
Q99536	VAT1	0.166103	0.164754	0.165429	0.000953887	14	14	14	46.8	46.8	46.8	41.92	0	323.31	10583000000	4869900000	5713000000	6	5	14	4	Q99536	Synaptic vesicle membrane protein VAT-1 homolog
Q9HAV4	XPO5	0.39374	0.4902	0.44197	0.0682075	56	56	56	56.1	56.1	56.1	136.31	0	323.31	25530000000	11323000000	14206000000	35	40	42	44	Q9HAV4	Exportin-5
Q99829	CPNE1	0.72528	0.504149	0.614714	0.156363	14	14	14	32.2	32.2	32.2	59.058	0	170.72	8629500000	2843000000	5786500000	5	11	11	6	Q99829	Copine-1
O75396	SEC22B	-0.149445	-0.152789	-0.151117	0.00236457	12	12	12	47.9	47.9	47.9	24.593	0	184.36	19451000000	9346400000	10105000000	6	10	9	11	O75396	Vesicle-trafficking protein SEC22b
P08754	GNAI3	-1.02109	-0.895041	-0.958067	0.0891301	17	10	10	53.7	38.7	38.7	40.532	0	323.31	3239500000	1611100000	1628400000	9	12	13	9	P08754	Guanine nucleotide-binding protein G(k) subunit alpha
Q9NPB8	GPCPD1				#DIV/0!	3	3	3	5.4	5.4	5.4	76.034	0	3.9468	159770000	73613000	86159000	2	1	1	1	Q9NPB8	Glycerophosphocholine phosphodiesterase GPCPD1
Q9HAU5	UPF2	0.0663672	0.0755587	0.070963	0.00649937	48	48	48	45.4	45.4	45.4	147.81	0	323.31	8520100000	3854900000	4665300000	29	35	30	30	Q9HAU5	Regulator of nonsense transcripts 2
P53985	SLC16A1	-0.56323	-0.210631	-0.386931	0.249325	8	8	8	14	14	14	53.944	0	60.498	4978500000	2889800000	2088700000	8	5	8	7	P53985	Monocarboxylate transporter 1
Q9NQW6	ANLN				#DIV/0!	13	13	13	15.4	15.4	15.4	124.2	0	30.156	219800000	79766000	140030000	7	8	0	0	Q9NQW6	Actin-binding protein anillin
P18440	NAT1	-0.393859	-0.826947	-0.610403	0.306239	5	5	5	23.4	23.4	23.4	33.898	0	49.136	542100000	333510000	208590000	2	2	3	4	P18440	Arylamine N-acetyltransferase 1
Q8NEM2	SHCBP1				#DIV/0!	3	3	3	6.4	6.4	6.4	75.69	0	4.8857	93224000	39792000	53432000	2	1	0	0	Q8NEM2	SHC SH2 domain-binding protein 1
P60903	S100A10	-1.04677	-0.859186	-0.952976	0.132642	5	5	5	45.4	45.4	45.4	11.203	0	19.237	1746000000	970190000	775800000	1	2	3	4	P60903	Protein S100-A10
P10620	MGST1	-0.260007	-0.512813	-0.38641	0.178761	5	5	5	38.1	38.1	38.1	17.598	0	53.918	5264700000	2273500000	2991200000	5	5	4	5	P10620	Microsomal glutathione S-transferase 1
O75438	NDUFB1	0.334322	0.305626	0.319974	0.0202911	5	5	5	70.7	70.7	70.7	6.9611	0	15.556	3607100000	1698300000	1908800000	3	4	5	4	O75438	NADH dehydrogenase [ubiquinone] 1 beta subcomplex subunit 1
Q2TAL8	QRICH1	1.37882		1.37882	#DIV/0!	9	9	9	18.2	18.2	18.2	86.435	0	35.864	803890000	293600000	510290000	7	6	4	1	Q2TAL8	Glutamine-rich protein 1
Q9BZL6	PRKD2	-0.596528		-0.596528	#DIV/0!	8	8	7	13.2	13.2	10.5	96.721	0	60.953	545450000	331770000	213680000	5	2	5	3	Q9BZL6	Serine/threonine-protein kinase D2
Q9BQB6	VKORC1	0.423222	0.19308	0.308151	0.162735	2	2	2	14.7	14.7	14.7	18.234	0	3.9364	590890000	252920000	337970000	2	2	1	1	Q9BQB6	Vitamin K epoxide reductase complex subunit 1
Q9BVK8	TMEM147	0.129897	0.0926411	0.111269	0.0263439	4	4	4	22.8	22.8	22.8	25.261	0	48.661	1057300000	385510000	671780000	2	3	2	1	Q9BVK8	Transmembrane protein 147
Q6UWE0	LRSAM1	0.605045		0.605045	#DIV/0!	5	5	5	9.1	9.1	9.1	83.593	0	3.8371	693980000	111660000	582320000	3	1	3	0	Q6UWE0	E3 ubiquitin-protein ligase LRSAM1
Q96DV4	MRPL38	-0.388088	-0.479719	-0.433903	0.0647929	8	8	8	26.8	26.8	26.8	44.596	0	44.464	2462400000	1466600000	995780000	3	3	8	4	Q96DV4	39S ribosomal protein L38, mitochondrial
Q6ZS17	FAM65A				#DIV/0!	4	4	4	4.7	4.7	4.7	132.31	0	20.47	81810000	47929000	33880000	4	0	0	0	Q6ZS17	Protein FAM65A
Q15758	SLC1A5	-0.112934	0.0174537	-0.0477403	0.092198	11	11	11	28.5	28.5	28.5	56.598	0	323.31	28746000000	12318000000	16428000000	8	10	10	9	Q15758	Neutral amino acid transporter B(0)
Q13838	DDX39B	-0.797531	-0.886193	-0.841862	0.0626935	25	25	13	64	64	37.4	48.991	0	323.31	62849000000	36704000000	26145000000	16	14	23	18	Q13838	Spliceosome RNA helicase DDX39B
P31939	ATIC	0.0199838	0.027392	0.0236879	0.00523839	40	40	40	77.9	77.9	77.9	64.615	0	323.31	78496000000	33684000000	44812000000	25	39	29	30	P31939	Bifunctional purine biosynthesis protein PURH;Phosphoribosylaminoimidazolecarboxamide formyltransferase;IMP cyclohydrolase
P07339	CTSD	0.825883	0.474747	0.650315	0.248291	17	17	17	49.8	49.8	49.8	44.552	0	115.11	17384000000	7429000000	9955000000	10	12	16	14	P07339	Cathepsin D;Cathepsin D light chain;Cathepsin D heavy chain
Q99653	CHP1	-1.32128	-1.21179	-1.26654	0.0774211	9	9	9	57.9	57.9	57.9	22.456	0	106.48	1763900000	926570000	837360000	3	7	7	7	Q99653	Calcineurin B homologous protein 1
Q969E2	SCAMP4	0.308099		0.308099	#DIV/0!	3	3	3	21	21	21	25.728	0	12.869	487910000	176390000	311520000	2	2	2	1	Q969E2	Secretory carrier-associated membrane protein 4
Q13112	CHAF1B		0.0636873	0.0636873	#DIV/0!	3	3	3	7.3	7.3	7.3	61.492	0	10.057	658830000	330090000	328740000	2	2	1	2	Q13112	Chromatin assembly factor 1 subunit B
P24941	CDK2	0.82326	0.921897	0.872578	0.0697469	17	16	14	66.1	63.4	55	33.929	0	89.388	3991100000	1102700000	2888400000	6	15	11	6	P24941	Cyclin-dependent kinase 2
Q969M1	TOMM40L	0.970584		0.970584	#DIV/0!	5	5	5	26.9	26.9	26.9	33.916	0	14.812	602570000	116620000	485950000	2	5	2	1	Q969M1	Mitochondrial import receptor subunit TOM40B
Q9P2J5	LARS	-0.0757088	-0.0457001	-0.0607044	0.0212194	75	75	75	63.2	63.2	63.2	134.46	0	323.31	76911000000	39236000000	37675000000	57	60	59	61	Q9P2J5	Leucine--tRNA ligase, cytoplasmic
Q96QU8	XPO6	0.353416	0.451998	0.402707	0.069708	14	14	14	12.7	12.7	12.7	128.88	0	19.364	927430000	463630000	463800000	10	3	7	6	Q96QU8	Exportin-6
Q14498	RBM39	-0.0197117	-0.172207	-0.0959591	0.10783	20	20	20	46.8	46.8	46.8	59.379	0	282.54	16237000000	7709000000	8527600000	17	17	11	12	Q14498;Q86U06	RNA-binding protein 39
P62258	YWHAE	-0.309136	-0.109858	-0.209497	0.140911	28	28	25	80.4	80.4	77.6	29.174	0	323.31	137720000000	67114000000	70603000000	10	25	21	21	P62258	14-3-3 protein epsilon
Q96MW5	COG8	0.613562	0.267591	0.440577	0.244638	8	8	8	21.6	21.6	21.6	68.423	0	73.241	798680000	368820000	429860000	5	3	4	5	Q96MW5	Conserved oligomeric Golgi complex subunit 8
P28331	NDUFS1	-0.115824	-0.0387723	-0.0772979	0.0544838	31	31	31	55.2	55.2	55.2	79.467	0	323.31	27213000000	12076000000	15137000000	18	29	17	15	P28331	NADH-ubiquinone oxidoreductase 75 kDa subunit, mitochondrial
P48444	ARCN1	0.301642	0.13238	0.217011	0.119686	29	29	29	58.9	58.9	58.9	57.21	0	175.92	19248000000	8548300000	10700000000	7	21	26	17	P48444	Coatomer subunit delta
Q9UJV9	DDX41	0.82886	1.22778	1.02832	0.282079	7	7	7	14.5	14.5	14.5	69.837	0	23.25	790780000	293590000	497190000	5	3	2	2	Q9UJV9	Probable ATP-dependent RNA helicase DDX41
Q0VDF9	HSPA14	1.07964	1.31853	1.19908	0.168921	13	13	13	37.3	37.3	37.3	54.794	0	86.257	1455500000	494260000	961230000	6	7	6	5	Q0VDF9	Heat shock 70 kDa protein 14
P37198	NUP62	-0.207385	0.0242677	-0.0915586	0.163803	6	6	6	14.8	14.8	14.8	53.254	0	108.76	2345200000	1257900000	1087200000	4	5	5	4	P37198	Nuclear pore glycoprotein p62
Q01469	FABP5	-0.939818	-0.628611	-0.784215	0.220057	20	20	20	82.2	82.2	82.2	15.164	0	323.31	36390000000	21833000000	14557000000	7	16	15	19	Q01469;A8MUU1	Fatty acid-binding protein, epidermal
Q13045	FLII	0.220505	0.305165	0.262835	0.0598637	57	57	57	51.7	51.7	51.7	144.75	0	323.31	16760000000	7312600000	9447200000	36	36	34	38	Q13045	Protein flightless-1 homolog
P53041	PPP5C	-0.0573103	0.274643	0.108666	0.234726	18	18	18	42.5	42.5	42.5	56.878	0	323.31	9001000000	3701000000	5300000000	6	17	9	8	P53041	Serine/threonine-protein phosphatase 5
Q8IWJ2	GCC2	2.05413	1.74621	1.90017	0.217732	45	42	42	33.8	31.4	31.4	195.91	0	282.52	2838800000	828310000	2010500000	23	32	22	15	Q8IWJ2	GRIP and coiled-coil domain-containing protein 2
Q9Y230	RUVBL2	-0.00632481	-0.115356	-0.0608404	0.0770967	29	29	29	66.1	66.1	66.1	51.156	0	323.31	23416000000	10910000000	12506000000	15	20	21	8	Q9Y230	RuvB-like 2
P54136	RARS	-0.0124396	-0.0928143	-0.0526269	0.0568335	41	41	41	63.8	63.8	63.8	75.378	0	323.31	33770000000	15719000000	18051000000	24	32	18	29	P54136	Arginine--tRNA ligase, cytoplasmic
Q96QR8	PURB	0.721358		0.721358	#DIV/0!	6	6	6	35.6	35.6	35.6	33.24	0	115.85	562400000	249720000	312680000	2	1	6	3	Q96QR8	Transcriptional activator protein Pur-beta
Q8TBA6	GOLGA5	-0.0503793		-0.0503793	#DIV/0!	5	5	5	10.1	10.1	10.1	83.023	0	46.273	70283000	29148000	41135000	2	2	2	0	Q8TBA6	Golgin subfamily A member 5
Q9Y4C1	KDM3A	0.0647712		0.0647712	#DIV/0!	44	42	42	48.4	46.5	46.5	147.34	0	297.68	2475800000	918260000	1557600000	34	31	12	3	Q9Y4C1	Lysine-specific demethylase 3A
Q86TM6	SYVN1	0.572207	0.676424	0.624315	0.0736925	9	9	9	15.6	15.6	15.6	67.684	0	12.923	514620000	172600000	342020000	3	8	5	2	Q86TM6	E3 ubiquitin-protein ligase synoviolin
P00441	SOD1	-1.67855	-1.29056	-1.48456	0.27435	13	13	13	90.9	90.9	90.9	15.936	0	323.31	91459000000	63166000000	28293000000	6	8	11	11	P00441	Superoxide dismutase [Cu-Zn]
Q15404	RSU1	0.403674	0.31603	0.359852	0.0619737	8	8	8	32.5	32.5	32.5	31.54	0	29.606	3017100000	1128900000	1888200000	3	7	4	5	Q15404	Ras suppressor protein 1
O95202	LETM1	-0.240034	-0.150379	-0.195207	0.0633957	31	31	31	55.9	55.9	55.9	83.353	0	323.31	15464000000	6560100000	8904000000	22	25	20	14	O95202	LETM1 and EF-hand domain-containing protein 1, mitochondrial
O94855	SEC24D	0.857174	1.339	1.09808	0.340702	21	20	20	27.4	26.1	26.1	113.01	0	145.16	2045100000	545320000	1499700000	10	18	2	7	O94855	Protein transport protein Sec24D
P22612	PRKACG	-0.303655		-0.303655	#DIV/0!	3	1	1	14.8	6.8	6.8	40.434	0	183.87	1120600000	428890000	691730000	3	1	3	2	P22612	cAMP-dependent protein kinase catalytic subunit gamma
Q8IZ83	ALDH16A1	-0.669097	-0.485264	-0.577181	0.12999	16	16	16	27.9	27.9	27.9	85.126	0	179.63	4420100000	2025900000	2394300000	6	10	7	9	Q8IZ83	Aldehyde dehydrogenase family 16 member A1
Q9Y2G2	CARD8	1.02024	0.911168	0.965704	0.0771256	11	11	11	39	39	39	48.932	0	82.875	850360000	259940000	590430000	4	7	5	7	Q9Y2G2	Caspase recruitment domain-containing protein 8
P61011	SRP54	0.751238	0.643444	0.697341	0.0762219	17	17	17	40.7	40.7	40.7	55.704	0	167.16	4239400000	1786300000	2453000000	8	11	11	10	P61011	Signal recognition particle 54 kDa protein
P62805	HIST1H4A	0.439716	0.131341	0.285528	0.218054	20	20	20	68.9	68.9	68.9	11.367	0	176.26	247420000000	110990000000	136430000000	14	18	18	18	P62805	Histone H4
P51553	IDH3G	0.123306	-0.352407	-0.114551	0.33638	8	8	8	35.1	35.1	35.1	42.794	0	244.18	1671000000	973500000	697550000	3	1	7	4	P51553	Isocitrate dehydrogenase [NAD] subunit gamma, mitochondrial
Q9H2U2	PPA2	0.0558545	0.121767	0.0888109	0.0466072	18	18	18	58.4	58.4	58.4	37.92	0	323.31	27429000000	8732100000	18697000000	6	17	14	14	Q9H2U2	Inorganic pyrophosphatase 2, mitochondrial
Q86TX2	ACOT1	-0.843863	-0.556411	-0.700137	0.203259	16	16	3	55.3	55.3	10.5	46.277	0	323.31	6013800000	3228700000	2785100000	7	12	14	6	Q86TX2	Acyl-coenzyme A thioesterase 1
Q99643	SDHC	1.06539	0.877905	0.971649	0.132572	4	4	4	38.5	38.5	38.5	18.61	0	43.467	5332500000	1413400000	3919000000	2	3	4	3	Q99643	Succinate dehydrogenase cytochrome b560 subunit, mitochondrial
Q15427	SF3B4	0.490298	0.029804	0.260051	0.325618	5	5	5	17.2	17.2	17.2	44.385	0	238.72	3711600000	1313000000	2398600000	2	4	3	4	Q15427	Splicing factor 3B subunit 4
Q9UMX0	UBQLN1	-0.0964586	0.047881	-0.0242888	0.102064	10	10	7	28.7	28.7	19.7	62.518	0	323.31	3572900000	1692400000	1880500000	6	6	4	4	Q9UMX0	Ubiquilin-1
Q96RE7	NACC1	-2.89883		-2.89883	#DIV/0!	8	8	8	19.7	19.7	19.7	57.258	0	30.066	282140000	198230000	83911000	3	2	4	3	Q96RE7;Q96BF6	Nucleus accumbens-associated protein 1
Q7KZF4	SND1	0.0579995	0.0233401	0.0406698	0.0245079	49	49	49	62.9	62.9	62.9	102	0	323.31	50596000000	24453000000	26143000000	31	44	36	37	Q7KZF4	Staphylococcal nuclease domain-containing protein 1
Q9UL26	RAB22A	0.822782	1.67873	1.25076	0.605247	9	7	7	55.7	44.3	44.3	21.855	0	69.758	961950000	302830000	659120000	5	8	7	5	Q9UL26	Ras-related protein Rab-22A
Q9BZE1	MRPL37	-0.125187	-0.285662	-0.205424	0.113473	19	19	19	60.3	60.3	60.3	48.117	0	130.05	2483300000	1021600000	1461800000	6	11	15	7	Q9BZE1	39S ribosomal protein L37, mitochondrial
P07900	HSP90AA1	0.289469	0.236044	0.262756	0.0377772	70	49	44	77.2	55.6	52.3	84.659	0	323.31	296520000000	110040000000	186480000000	54	59	49	51	P07900;Q14568;Q58FG1	Heat shock protein HSP 90-alpha
P21359	NF1	1.45035	1.1635	1.30692	0.202834	36	36	36	15	15	15	319.37	0	73.775	932500000	256260000	676250000	14	25	24	9	P21359	Neurofibromin;Neurofibromin truncated
Q92574	TSC1				#DIV/0!	4	4	4	6.4	6.4	6.4	129.77	0	3.5405	65438000	33974000	31464000	2	1	1	1	Q92574	Hamartin
P07195	LDHB	-0.0632279	0.00480846	-0.0292097	0.048109	26	24	24	68	62.6	62.6	36.638	0	323.31	161730000000	61028000000	100700000000	17	24	24	19	P07195;Q6ZMR3;P07864	L-lactate dehydrogenase B chain
Q9NPA0	EMC7	0.34996	0.595165	0.472562	0.173386	5	5	5	29.8	29.8	29.8	26.47	0	31.149	1203900000	475290000	728620000	1	3	2	4	Q9NPA0	ER membrane protein complex subunit 7
Q96SB4	SRPK1	-1.05707	-1.09916	-1.07811	0.0297621	14	14	12	25.6	25.6	22.4	74.324	0	67.049	3417900000	2216200000	1201800000	10	6	10	10	Q96SB4;Q9UPE1	SRSF protein kinase 1
Q15054	POLD3	0.324615	0.315877	0.320246	0.0061787	8	8	8	20.2	20.2	20.2	51.4	0	26.88	710400000	299200000	411200000	2	5	4	4	Q15054	DNA polymerase delta subunit 3
P07311	ACYP1	-1.97442	-2.05786	-2.01614	0.059001	7	7	7	56.6	56.6	56.6	11.261	0	13.405	1208400000	756500000	451860000	2	4	5	5	P07311	Acylphosphatase-1
Q8WZ82	OVCA2	1.20602	1.15726	1.18164	0.0344785	7	7	7	55.1	55.1	55.1	24.418	0	37.057	628940000	244350000	384590000	3	3	5	6	Q8WZ82	Ovarian cancer-associated gene 2 protein
Q9Y320	TMX2	0.202608		0.202608	#DIV/0!	6	6	6	25	25	25	34.037	0	13.533	685180000	354920000	330260000	3	2	5	1	Q9Y320	Thioredoxin-related transmembrane protein 2
Q9Y3D8	AK6	1.65223	1.95704	1.80464	0.215533	7	7	7	44.8	44.8	44.8	20.061	0	14.968	1353400000	451170000	902250000	2	5	6	5	Q9Y3D8	Adenylate kinase isoenzyme 6
Q9Y5P4	COL4A3BP	1.16915	0.596324	0.882736	0.405049	13	13	13	29	29	29	70.834	0	98.129	919780000	306540000	613230000	3	7	7	3	Q9Y5P4	Collagen type IV alpha-3-binding protein
P46063	RECQL	-0.0175208	-0.0250574	-0.0212891	0.00532918	24	24	24	50.8	50.8	50.8	73.457	0	160.31	18108000000	13965000000	4143500000	17	16	15	11	P46063	ATP-dependent DNA helicase Q1
P42766	RPL35	0.107405	0.12704	0.117223	0.013884	7	7	7	43.1	43.1	43.1	14.551	0	46.988	14301000000	7230000000	7070800000	2	4	5	7	P42766	60S ribosomal protein L35
P00156	MT-CYB	0.156503	-0.404938	-0.124218	0.396999	2	2	2	5	5	5	42.717	0.00084345	2.3628	671170000	275720000	395450000	1	1	2	1	P00156	Cytochrome b
Q15388	TOMM20		1.21762	1.21762	#DIV/0!	4	4	4	35.9	35.9	35.9	16.298	0	24.999	1452400000	406830000	1045600000	1	3	0	3	Q15388	Mitochondrial import receptor subunit TOM20 homolog
Q9NVS9	PNPO	-0.0694783	0.226896	0.0787088	0.209568	14	14	14	63.6	63.6	63.6	29.988	0	323.31	6341100000	2894300000	3446800000	4	10	8	8	Q9NVS9	Pyridoxine-5-phosphate oxidase
P40616	ARL1	-0.146022	0.400476	0.127227	0.386432	6	6	6	40.9	40.9	40.9	20.417	0	49.035	2100400000	1182900000	917530000	4	4	5	3	P40616	ADP-ribosylation factor-like protein 1
P28070	PSMB4	0.128877	0.42608	0.277479	0.210154	8	8	8	48.5	48.5	48.5	29.204	0	323.31	18445000000	6453500000	11992000000	4	6	7	8	P28070	Proteasome subunit beta type-4
Q9H2H9	SLC38A1	4.6997	3.13587	3.91778	1.10579	7	7	7	10.9	10.9	10.9	54.047	0	9.1574	2389100000	302180000	2086900000	4	7	4	5	Q9H2H9	Sodium-coupled neutral amino acid transporter 1
Q3ZCQ8	TIMM50	0.24023	-0.182094	0.0290679	0.298628	8	8	8	28.6	28.6	28.6	39.646	0	282.3	7507300000	3442400000	4064800000	4	7	7	5	Q3ZCQ8	Mitochondrial import inner membrane translocase subunit TIM50
Q9Y3B4	SF3B6	0.47487	0.480006	0.477438	0.0036317	6	6	6	53.6	53.6	53.6	14.585	0	46.999	8888400000	3801400000	5086900000	3	5	6	5	Q9Y3B4	Splicing factor 3B subunit 6
Q9UNN5	FAF1	0.0596763	0.125638	0.0926569	0.046642	19	19	19	40.2	40.2	40.2	73.953	0	191.43	5703300000	2292300000	3411000000	16	16	13	9	Q9UNN5	FAS-associated factor 1
P62306	SNRPF	-0.504048	-0.438996	-0.471522	0.0459987	10	10	10	98.8	98.8	98.8	9.7251	0	82.119	13522000000	7475100000	6046700000	5	7	8	10	P62306	Small nuclear ribonucleoprotein F
Q8TD19	NEK9	0.854129	0.851602	0.852866	0.00178686	20	20	20	30	30	30	107.17	0	142.51	3827800000	1521700000	2306200000	11	11	11	13	Q8TD19;REV__Q9P0M6	Serine/threonine-protein kinase Nek9
O00483	NDUFA4	-0.11861	-0.0104358	-0.064523	0.0764907	6	6	6	55.6	55.6	55.6	9.3697	0	11.89	6672900000	3723300000	2949700000	2	5	5	6	O00483	Cytochrome c oxidase subunit NDUFA4
Q15652	JMJD1C				#DIV/0!	16	16	16	8.7	8.7	8.7	284.52	0	28.109	244140000	41031000	203110000	5	15	0	1	Q15652	Probable JmjC domain-containing histone demethylation protein 2C
Q9Y6C9	MTCH2	0.393433	0.292064	0.342749	0.0716787	11	11	11	39.3	39.3	39.3	33.331	0	117.71	5011100000	1827600000	3183500000	2	7	7	6	Q9Y6C9	Mitochondrial carrier homolog 2
O43760	SYNGR2	-0.487199	-0.321684	-0.404441	0.117037	6	6	6	21	21	21	24.81	0	12.908	8346300000	3309500000	5036800000	2	5	5	6	O43760	Synaptogyrin-2
Q5VWZ2	LYPLAL1	-0.115524	-0.00168648	-0.0586051	0.0804953	10	10	10	48.5	48.5	48.5	26.316	0	224.89	5763300000	3197700000	2565700000	3	6	9	8	Q5VWZ2	Lysophospholipase-like protein 1
P60510	PPP4C	0.264365	0.139401	0.201883	0.0883629	10	9	9	48.2	43.6	43.6	35.08	0	183.01	3763900000	1609800000	2154100000	4	9	8	6	P60510	Serine/threonine-protein phosphatase 4 catalytic subunit
Q9BY50	SEC11C	0.228118	0.630496	0.429307	0.284524	6	6	6	36.5	36.5	36.5	21.542	0	25.72	1213000000	550210000	662770000	3	4	3	4	Q9BY50	Signal peptidase complex catalytic subunit SEC11C
Q53H12	AGK	-0.656907	-0.378788	-0.517848	0.19666	13	13	13	42.9	42.9	42.9	47.137	0	167	6305900000	3312700000	2993200000	8	5	10	5	Q53H12	Acylglycerol kinase, mitochondrial
Q3ZCM7	TUBB8	-0.394785	-0.350369	-0.372577	0.0314069	13	4	4	28.6	11.5	11.5	49.775	0	268.95	6095200000	2749300000	3345800000	10	11	13	11	Q3ZCM7	Tubulin beta-8 chain
P35606	COPB2	0.515327	0.437602	0.476464	0.0549599	47	47	47	73.7	73.7	73.7	102.49	0	323.31	26900000000	10811000000	16089000000	32	38	42	31	P35606	Coatomer subunit beta
Q9NVV4	MTPAP	0.589525	0.031416	0.310471	0.394643	4	4	4	9.5	9.5	9.5	66.171	0	20.876	568600000	264050000	304540000	2	2	2	2	Q9NVV4	Poly(A) RNA polymerase, mitochondrial
Q96SU4	OSBPL9	0.0368055	0.0293146	0.03306	0.00529687	5	5	5	12.4	12.4	12.4	83.184	0	36.729	961700000	514090000	447610000	4	2	3	3	Q96SU4	Oxysterol-binding protein-related protein 9
Q99460	PSMD1	0.0467223	0.0283354	0.0375289	0.0130015	47	47	47	60.3	60.3	60.3	105.84	0	323.31	30886000000	14366000000	16519000000	34	33	34	31	Q99460	26S proteasome non-ATPase regulatory subunit 1
P47985	UQCRFS1	0.226091	0.348203	0.287147	0.0863462	15	15	2	49.6	49.6	8	29.668	0	323.31	25827000000	8695900000	17132000000	8	12	12	11	P47985	Cytochrome b-c1 complex subunit Rieske, mitochondrial;Cytochrome b-c1 complex subunit 11
Q7L1W4	LRRC8D	2.01477	0.871914	1.44334	0.808121	22	22	22	33.2	33.2	33.2	98.2	0	151.42	1912800000	453250000	1459600000	10	17	9	4	Q7L1W4	Volume-regulated anion channel subunit LRRC8D
Q5EB52	MEST	0.990836	0.872351	0.931593	0.0837815	5	5	5	20.9	20.9	20.9	38.83	0	40.597	1516500000	394740000	1121700000	3	3	4	2	Q5EB52	Mesoderm-specific transcript homolog protein
Q9UNS1	TIMELESS	1.59641	1.40187	1.49914	0.137561	17	17	17	17.3	17.3	17.3	138.66	0	52.397	532460000	208840000	323620000	12	4	6	11	Q9UNS1	Protein timeless homolog
Q16181	2007-09-01	-0.44429	-0.394606	-0.419448	0.0351319	19	18	18	49.9	46.2	46.2	50.679	0	323.31	13652000000	6180500000	7471600000	11	12	15	9	Q16181;Q6ZU15	Septin-7
Q9Y2G3	ATP11B	0.157664		0.157664	#DIV/0!	21	21	20	24.6	24.6	24	134.19	0	114.03	1336100000	339250000	996860000	18	18	5	2	Q9Y2G3;Q8NB49	Probable phospholipid-transporting ATPase IF
Q9P287	BCCIP	-0.0905145	-0.174389	-0.132452	0.0593082	10	10	10	36.3	36.3	36.3	35.979	0	323.31	6302600000	2806500000	3496100000	7	8	8	6	Q9P287	BRCA2 and CDKN1A-interacting protein
Q504Q3	PAN2	0.16437	-0.0695517	0.047409	0.165408	10	10	10	10.2	10.2	10.2	135.37	0	15.166	594270000	292130000	302140000	6	4	7	4	Q504Q3	PAB-dependent poly(A)-specific ribonuclease subunit PAN2
Q8IWX8	CHERP	-0.464067	-0.210653	-0.33736	0.179191	28	28	28	38.5	38.5	38.5	103.7	0	323.31	8725200000	4730300000	3994900000	18	19	17	18	Q8IWX8	Calcium homeostasis endoplasmic reticulum protein
Q6NXR4	TTI2	-0.09341	0.240998	0.0737939	0.236462	8	8	8	23.4	23.4	23.4	56.914	0	60.327	696660000	260520000	436140000	4	2	6	4	Q6NXR4	TELO2-interacting protein 2
Q7Z2Z2	EFTUD1	-0.677026	-0.782682	-0.729854	0.0747101	37	37	37	40.7	40.7	40.7	125.43	0	323.31	5203500000	3300200000	1903400000	22	15	19	22	Q7Z2Z2	Elongation factor Tu GTP-binding domain-containing protein 1
Q96BX8	MOB3A	0.0893625	0.30762	0.198491	0.154331	11	11	8	48.8	48.8	39.6	25.464	0	40.017	1668700000	741030000	927700000	1	4	9	6	Q96BX8;Q70IA8	MOB kinase activator 3A
Q8NE00	TMEM104		1.71944	1.71944	#DIV/0!	3	3	3	6	6	6	55.678	0.0071451	1.3998	182920000	28358000	154560000	3	3	2	2	Q8NE00	Transmembrane protein 104
P05387	RPLP2	0.18748	1.02683	0.607157	0.59351	11	11	10	97.4	97.4	82.6	11.665	0	265.88	11467000000	5771300000	5695200000	4	9	7	8	P05387	60S acidic ribosomal protein P2
P45880	VDAC2	0.237546	0.0674118	0.152479	0.120303	25	25	25	76.9	76.9	76.9	31.566	0	323.31	35786000000	12496000000	23290000000	13	17	16	12	P45880	Voltage-dependent anion-selective channel protein 2
O75629	CREG1	1.33846	1.61573	1.47709	0.196059	5	5	5	32.3	32.3	32.3	24.074	0	127	3562400000	1201700000	2360700000	2	3	2	4	O75629	Protein CREG1
P05386	RPLP1	0.253588	0.113569	0.183578	0.0990084	7	6	6	99.1	84.2	84.2	11.514	0	301.17	21699000000	10838000000	10861000000	4	3	6	5	P05386	60S acidic ribosomal protein P1
P04818	TYMS	1.32693		1.32693	#DIV/0!	7	7	7	31.9	31.9	31.9	35.716	0	34.595	1669000000	1053500000	615500000	4	4	6	2	P04818	Thymidylate synthase
O94832	MYO1D	-1.98281	-1.67377	-1.82829	0.218524	23	22	22	28	27.1	27.1	116.2	0	54.479	1763000000	1636700000	126320000	11	0	18	12	O94832	Unconventional myosin-Id
P18583	SON	0.444782	0.942731	0.693757	0.352103	61	61	61	34	34	34	263.83	0	323.31	10270000000	5385600000	4884100000	51	47	32	24	P18583	Protein SON
P09668	CTSH	-2.05774	-2.11388	-2.08581	0.039697	9	9	9	38.5	38.5	38.5	37.393	0	27.878	965610000	690290000	275320000	0	3	8	4	P09668	Pro-cathepsin H;Cathepsin H mini chain;Cathepsin H;Cathepsin H heavy chain;Cathepsin H light chain
Q9BV86	NTMT1	-0.681989	-1.02998	-0.855984	0.246067	10	10	10	48.9	48.9	48.9	25.387	0	94.833	1695700000	943970000	751700000	5	3	7	8	Q9BV86	N-terminal Xaa-Pro-Lys N-methyltransferase 1;N-terminal Xaa-Pro-Lys N-methyltransferase 1, N-terminally processed
O60879	DIAPH2	0.495651	0.437035	0.466343	0.0414478	27	27	27	30.4	30.4	30.4	125.57	0	104.96	1508600000	564620000	944010000	11	19	8	6	O60879	Protein diaphanous homolog 2
Q86TU7	SETD3	0.257741	0.286174	0.271957	0.0201052	13	13	13	29.1	29.1	29.1	67.256	0	172.06	2354900000	1134100000	1220800000	10	6	9	9	Q86TU7	Histone-lysine N-methyltransferase setd3
Q03252	LMNB2	-1.15546	-1.21086	-1.18316	0.0391737	39	35	35	56.6	52.6	52.6	69.948	0	251.01	9133100000	5365800000	3767300000	21	24	24	26	Q03252	Lamin-B2
Q9NVH2	INTS7	-0.700165	-0.0519967	-0.376081	0.458324	11	11	11	18	18	18	106.83	0	203.53	983520000	539250000	444280000	7	2	7	3	Q9NVH2	Integrator complex subunit 7
Q6NVY1	HIBCH	0.0897835	0.296237	0.19301	0.145985	10	10	10	25.6	25.6	25.6	43.482	0	58.987	5699500000	2008700000	3690800000	6	8	8	7	Q6NVY1	3-hydroxyisobutyryl-CoA hydrolase, mitochondrial
Q96IJ6	GMPPA	0.799224	0.949202	0.874213	0.10605	9	9	9	21.9	21.9	21.9	46.291	0	49.264	1579400000	662160000	917210000	5	7	6	3	Q96IJ6	Mannose-1-phosphate guanyltransferase alpha
Q8NEC7	GSTCD	0.572069	0.0937051	0.332887	0.338254	3	3	3	6.6	6.6	6.6	71.078	0	11.135	200070000	119780000	80282000	2	1	3	3	Q8NEC7	Glutathione S-transferase C-terminal domain-containing protein
Q14974	KPNB1	0.0280265	-0.0630106	-0.0174921	0.064373	38	38	38	50.3	50.3	50.3	97.169	0	323.31	75636000000	37410000000	38225000000	24	33	22	28	Q14974	Importin subunit beta-1
Q6DD88	ATL3	-0.720179	-0.469569	-0.594874	0.177208	17	17	17	49.2	49.2	49.2	60.541	0	323.31	8640600000	4215700000	4424900000	10	10	11	12	Q6DD88	Atlastin-3
Q86W42	THOC6	0.673328	0.511486	0.592407	0.11444	7	7	7	33.4	33.4	33.4	37.535	0	84.232	1221200000	503230000	717920000	3	2	6	1	Q86W42	THO complex subunit 6 homolog
Q86XI2	NCAPG2	2.33239	1.42963	1.88101	0.638348	24	24	24	28	28	28	130.96	0	69	1812300000	497200000	1315100000	16	15	15	13	Q86XI2	Condensin-2 complex subunit G2
Q9Y2R9	MRPS7	-0.646672	-0.620019	-0.633346	0.0188465	11	11	11	49.6	49.6	49.6	28.134	0	95.945	4483700000	2847400000	1636300000	3	3	9	10	Q9Y2R9	28S ribosomal protein S7, mitochondrial
Q9H223	EHD4	1.88532	1.49561	1.69046	0.275567	15	13	11	34.8	31.1	27.7	61.174	0	80.445	1791100000	524090000	1267000000	6	9	11	5	Q9H223	EH domain-containing protein 4
[truncated: 3,178 more rows]

## Sheet: Significant_Upregulatedproteins
		UPREGULATED PROTEINS IN KU812 ImaR VS. KU812 P
		Protein names	Gene names	Mean Log2 fold change	SD Log2 fold change	FD
		Protein S100-A9	S100A9	8.62206	0.89705	394.002
		Protein S100-P	S100P	7.12178	0.0781353	139.274
		NADH-cytochrome b5 reductase 2	CYB5R2	6.61311	N.D.	97.8914
		Protein kinase C delta type	PRKCD	5.64587	2.43028	50.0698
		Protein lin-28 homolog B	LIN28B	5.51008	N.D.	45.5721
		Cytoskeleton-associated protein 4	CKAP4	5.31718	1.75355	39.8686
		Cysteine-rich protein 1	CRIP1	5.25314	0.405391	38.1375
		Protein S100-A8;Protein S100-A8, N-terminally processed	S100A8	5.2209	0.0444275	37.2947
		Phosphoglucomutase-1	PGM1	5.09386	1.78264	34.1511
		Apolipoprotein C-II;Proapolipoprotein C-II	APOC2	5.09008	N.D.	34.0617
		Liver carboxylesterase 1	CES1	5.0717	0.304021	33.6305
		High affinity immunoglobulin epsilon receptor subunit gamma	FCER1G	5.05577	0.509492	33.2612
		CD166 antigen	ALCAM	4.99936	N.D.	31.9858
		Argininosuccinate synthase	ASS1	4.95731	0.164537	31.067
		Melanoma-associated antigen B2	MAGEB2	4.93494	N.D.	30.589
		Mitochondrial 10-formyltetrahydrofolate dehydrogenase	ALDH1L2	4.87412	2.91513	29.3262
		Arachidonate 5-lipoxygenase-activating protein	ALOX5AP	4.79589	0.606408	27.7784
		Peptidyl-prolyl cis-trans isomerase C	PPIC	4.78542	N.D.	27.5775
		Bifunctional 3-phosphoadenosine 5-phosphosulfate synthase 2	PAPSS2	4.69638	2.88623	25.9269
		Aldehyde dehydrogenase, mitochondrial	ALDH2	4.68531	0.89239	25.7288
		HLA class II histocompatibility antigen gamma chain	CD74	4.64703	N.D.	25.0551
		Myeloblastin	PRTN3	4.64695	0.268531	25.0537
		Transketolase-like protein 1	TKTL1	4.59856	0.191216	24.2273
		Cellular retinoic acid-binding protein 1	CRABP1	4.54851	1.07372	23.4012
		Cathepsin G	CTSG	4.51855	0.33683	22.9202
		Gametocyte-specific factor 1	GTSF1	4.49368	N.D.	22.5285
		Putative hydroxypyruvate isomerase	HYI	4.45155	N.D.	21.8801
		CAAX prenyl protease 1 homolog	ZMPSTE24	4.44764	0.410857	21.8209
		Heat shock protein beta-1	HSPB1	4.44559	0.093133	21.7899
		Cystatin-A;Cystatin-A, N-terminally processed	CSTA	4.39678	0.897014	21.0651
		Azurocidin	AZU1	4.36331	N.D.	20.582
		Insulin-like growth factor 2 mRNA-binding protein 1	IGF2BP1	4.34954	1.43381	20.3865
		HLA class II histocompatibility antigen, DR alpha chain	HLA-DRA	4.28256	N.D.	19.4616
		Neutrophil cytosol factor 1;Putative neutrophil cytosol factor 1B	NCF1;NCF1B;NCF1C	4.24641	N.D.	18.98
		Cytochrome b-245 light chain	CYBA	4.22665	N.D.	18.7218
		Glycogen phosphorylase, liver form	PYGL	4.15431	0.292134	17.8062
		Unconventional myosin-VI	MYO6	4.14672	0.0211849	17.7128
		Pleckstrin	PLEK	4.13537	0.145989	17.574
		Serglycin	SRGN	4.1125	1.28286	17.2976
		Ubiquitin-like modifier-activating enzyme ATG7	ATG7	3.96517	0.126049	15.6183
		Fatty acyl-CoA reductase 1	FAR1	3.94085	N.D.	15.3573
		Sideroflexin-2	SFXN2	3.93757	N.D.	15.3224
		Chitinase-3-like protein 1	CHI3L1	3.92515	0.698374	15.1911
		Sodium-coupled neutral amino acid transporter 1	SLC38A1/SNAT1	3.91778	1.10579	15.1136
		Major facilitator superfamily domain-containing protein 1	MFSD1	3.91743	N.D.	15.11
		Neutrophil elastase	ELANE	3.9001	0.137327	14.9296
		Prostaglandin reductase 1	PTGR1	3.88294	0.884902	14.753
		CD63 antigen	CD63	3.8452	N.D.	14.3721
		Myeloperoxidase	MPO	3.83538	0.318629	14.2746
		Sulfide:quinone oxidoreductase, mitochondrial	SQRDL	3.83527	0.493766	14.2735
		HLA class I histocompatibility antigen, A-2 alpha chain	HLA-A	3.82167	0.751145	14.1396
		Leukocyte-associated immunoglobulin-like receptor 1	LAIR1	3.8127	1.16698	14.052
		Lymphocyte antigen 75	LY75	3.80541	0.246816	13.9811
		Myeloid cell nuclear differentiation antigen	MNDA	3.80437	N.D.	13.9711
		Integrin beta-2	ITGB2	3.79848	0.210159	13.9141
		Mast cell-expressed membrane protein 1	MCEMP1	3.78437	N.D.	13.7787
		Protein-methionine sulfoxide oxidase MICAL1	MICAL1	3.77443	0.112663	13.6841
		WD repeat- and FYVE domain-containing protein 4	WDFY4	3.77322	0.218369	13.6726
		Protein S100-A11;Protein S100-A11, N-terminally processed	S100A11	3.77101	0.0713541	13.6517
		Solute carrier family 2, facilitated glucose transporter member 5	SLC2A5/GLUT5	3.74699	N.D.	13.4263
		Coronin-1A	CORO1A	3.74319	0.296589	13.391
		Phosphatidylinositol 4,5-bisphosphate 3-kinase catalytic subunit delta isoform	PIK3CD	3.73178	0.66263	13.2855
		Engulfment and cell motility protein 2	ELMO2	3.68627	0.322865	12.8729
		Peptidase M20 domain-containing protein 2	PM20D2	3.68583	N.D.	12.869
		Thrombospondin type-1 domain-containing protein 7A	THSD7A	3.61738	N.D.	12.2727
		NAD(P)H dehydrogenase [quinone] 1	NQO1	3.61055	1.50189	12.2147
		Gamma-glutamyltranspeptidase 1, 3P, 2	GGT1;GGT3P;GGT2	3.60334	0.179966	12.1538
		Nicotinate-nucleotide pyrophosphorylase [carboxylating]	QPRT	3.59384	N.D.	12.0741
		Cullin-associated NEDD8-dissociated protein 2	CAND2	3.5928	0.723278	12.0654
		Dedicator of cytokinesis protein 10	DOCK10	3.58655	0.972583	12.0132
		Receptor-type tyrosine-protein phosphatase eta	PTPRJ	3.54646	0.2237	11.684
		Thyroid receptor-interacting protein 6	TRIP6	3.47971	N.D.	11.1557
		Adenylyl cyclase-associated protein 1	CAP1	3.45907	0.227985	10.9972
		Carboxypeptidase D	CPD	3.45154	0.159134	10.94
		Dehydrogenase/reductase SDR family member 9	DHRS9	3.42762	0.869126	10.7601
		Monocarboxylate transporter 4	SLC16A3/MCT4	3.3857	0.391051	10.4519
		TYRO protein tyrosine kinase-binding protein	TYROBP	3.3818	N.D.	10.4237
		Prolyl 3-hydroxylase 1	LEPRE1	3.36661	0.0354897	10.3146
		Anoctamin-6	ANO6	3.3648	0.0700955	10.3016
		C-type mannose receptor 2	MRC2	3.35977	0.639967	10.2658
1		Inactive ubiquitin thioesterase FAM105A	FAM105A	3.35628	N.D.	10.241
2		Synaptic vesicle membrane protein VAT-1 homolog-like	VAT1L	3.34829	0.296546	10.1844
3		CDKN2AIP N-terminal-like protein	CDKN2AIPNL	3.34306	0.57381	10.1476
4		Beta-1,4-galactosyltransferase 1	B4GALT1	3.34116	N.D.	10.1342
5		Huntingtin-interacting protein 1	HIP1	3.34093	1.4054	10.1326
6		Vesicle-associated membrane protein 8	VAMP8	3.3339	0.203286	10.0833
7		Tubulin beta-4A chain	TUBB4A	3.33314	0.243916	10.078
8		ER degradation-enhancing alpha-mannosidase-like protein 1	EDEM1	3.33078	0.0340967	10.0615
9		AT-rich interactive domain-containing protein 3A	ARID3A	3.32555	0.661201	10.0251
10		Delta-1-pyrroline-5-carboxylate synthase	ALDH18A1/P5CS	3.30955	0.119798	9.91457
11		Myoferlin	MYOF	3.2943	0.800226	9.81032
12		Palmitoyl-protein thioesterase 1	PPT1	3.28239	0.18254	9.72966
13		Fructose-2,6-bisphosphatase TIGAR	TIGAR	3.2629	N.D.	9.59911
14		PX domain-containing protein kinase-like protein	PXK	3.25558	0.289101	9.55052
15		Tubulin beta-6 chain	TUBB6	3.24462	0.330509	9.47825
16		Cartilage-associated protein	CRTAP	3.24258	0.25284	9.46485
17		1-phosphatidylinositol 4,5-bisphosphate phosphodiesterase gamma-2	PLCG2	3.23132	0.114169	9.39127
18		Laminin subunit beta-1	LAMB1	3.21157	N.D.	9.26358
19		Interferon-induced GTP-binding protein Mx2	MX2	3.19777	N.D.	9.17539
20		Calpain-5	CAPN5	3.19568	N.D.	9.16211
21		Lipoma-preferred partner	LPP	3.18533	N.D.	9.09662
22		G1/S-specific cyclin-D3	CCND3	3.18369	N.D.	9.08628
23		Fibrillin-2	FBN2	3.17515	0.247155	9.03265
24		Dynamin-1	DNM1	3.17023	0.0691338	9.0019
25		Integrin alpha-L	ITGAL	3.15408	0.133311	8.90169
26		Ras-related protein Rab-32	RAB32	3.14052	0.214784	8.81842
27		Phospholipase D4	PLD4	3.13307	0.203689	8.773
28		Phosphatidylinositol 3,4,5-trisphosphate 5-phosphatase 1	INPP5D	3.07818	0.168185	8.44548
29		Golgi SNAP receptor complex member 1	GOSR1	3.06071	0.197905	8.34383
30		Apoptosis-associated speck-like protein containing a CARD	PYCARD	3.04265	0.113759	8.24003
31		Ubiquitin-like modifier-activating enzyme 7	UBA7	3.03937	0.301913	8.22132
32		Caspase-7;Caspase-7 subunit p20;Caspase-7 subunit p11	CASP7	3.03698	N.D.	8.20771
33		Phosphatidylinositol 4-phosphate 3-kinase C2 domain-containing subunit alpha	PIK3C2A	3.02352	N.D.	8.13149
34		Microtubule-associated protein 1B	MAP1B	3.01939	0.0834457	8.10825
35		Protein Niban	FAM129A	3.0129	0.112854	8.07185
36		Annexin A4	ANXA4	3.00811	0.138487	8.0451
37		Beta-1-syntrophin	SNTB1	3.00349	0.920964	8.01938
38		Cell division cycle protein 20 homolog	CDC20	3.00095	N.D.	8.00527
39		Vesicular integral-membrane protein VIP36	LMAN2	2.9972	0.108244	7.98449
40		Glutathione peroxidase 7	GPX7	2.98343	0.11581	7.90864
41		Glutathione peroxidase 1	GPX1	2.96824	0.156143	7.82581
42		Prolyl endopeptidase-like	PREPL	2.94748	0.801491	7.714
43		Phosphatidylinositol 3,4,5-trisphosphate-dependent Rac exchanger 1 protein	PREX1	2.94653	0.935842	7.70893
44		Caspase-1	CASP1	2.94515	1.37549	7.70156
45		NACHT, LRR and PYD domains-containing protein 2	NLRP2	2.92429	1.10536	7.591
46		Acyl-CoA synthetase family member 2, mitochondrial	ACSF2	2.91692	0.208229	7.55232
47		Trans-Golgi network integral membrane protein 2	TGOLN2	2.90453	0.496573	7.48774
48		Uncharacterized protein KIAA0930	KIAA0930	2.86572	N.D.	7.289
49		Transmembrane protein with metallophosphoesterase domain	TMPPE	2.86189	0.028058	7.26967
50		Ras GTPase-activating-like protein IQGAP3	IQGAP3	2.85949	0.26112	7.25759
51		Glucocorticoid receptor	NR3C1	2.85932	N.D.	7.25673
52		Tyrosine-protein kinase HCK	HCK	2.85363	2.28022	7.22817
53		Solute carrier family 35 member B1	SLC35B1	2.84178	N.D.	7.16904
54		Nuclear pore membrane glycoprotein 210	NUP210	2.83688	0.0403758	7.14473
55		E3 ubiquitin-protein ligase CBL	CBL	2.83584	0.726319	7.13958
56		Macrophage-capping protein	CAPG	2.82758	0.283649	7.09882
57		Insulin-like growth factor 2 mRNA-binding protein 3	IGF2BP3	2.82528	N.D.	7.08752
58		Proteasome subunit beta type-9	PSMB9	2.82184	0.0491298	7.07064
59		Ras-related protein Rab-31	RAB31	2.79992	0.218998	6.96402
60		Phospholipase D3	PLD3	2.76394	0.0369463	6.79249
61		Sarcoplasmic reticulum histidine-rich calcium-binding protein	HRC	2.76372	N.D.	6.79145
62		Amyloid beta A4 precursor protein-binding family B member 1-interacting protein	APBB1IP	2.76198	0.0618011	6.78327
63		Methionine-R-sulfoxide reductase B2, mitochondrial	MSRB2	2.76069	0.361176	6.7772
64		WD repeat and FYVE domain-containing protein 1	WDFY1	2.75456	0.237439	6.74847
65		STE20/SPS1-related proline-alanine-rich protein kinase	STK39	2.72712	N.D.	6.62133
66		Mitochondrial peptide methionine sulfoxide reductase	MSRA	2.70838	0.0560382	6.53587
67		Golgi-associated plant pathogenesis-related protein 1	GLIPR2	2.70833	N.D.	6.53565
68		Galectin-3-binding protein	LGALS3BP	2.707	0.857685	6.52962
69		Transducin-like enhancer protein 3	TLE3	2.70078	4.89403	6.50153
70		HLA class I histocompatibility antigen, B-58 alpha chain	HLA-B	2.67159	0.165725	6.37131
71		Peptidyl-prolyl cis-trans isomerase H	PPIH	2.65912	0.0499571	6.31648
72		Sn1-specific diacylglycerol lipase beta	DAGLB	2.63725	0.747306	6.22145
73		CKLF-like MARVEL transmembrane domain-containing protein 6	CMTM6	2.62764	0.52649	6.18014
74		Solute carrier family 12 member 9	SLC12A9	2.6231	0.69481	6.16072
75		Inactive tyrosine-protein kinase 7	PTK7	2.62225	N.D.	6.1571
76		Proteasome subunit beta type-10	PSMB10	2.60721	0.0514703	6.09324
77		Insulin-like growth factor 2 mRNA-binding protein 2	IGF2BP2	2.60406	0.438774	6.07995
78		2-hydroxyacyl-CoA lyase 1	HACL1	2.6012	0.673993	6.06791
79		Beta-2-microglobulin;Beta-2-microglobulin form pI 5.3	B2M	2.57913	0.0855953	5.97579
80		DNA helicase B	HELB	2.57012	N.D.	5.93859
		CTP synthase 1	CTPS1	2.56536	0.0322229	5.91903
		Tripartite motif-containing protein 59	TRIM59	2.56157	N.D.	5.9035
		Unconventional myosin-If	MYO1F	2.56	0.0446326	5.89708
		Macrosialin	CD68	2.54068	N.D.	5.81863
		Glutathione S-transferase Mu 1	GSTM1	2.5328	0.25639	5.78694
		Coiled-coil domain-containing protein 88B	CCDC88B	2.52007	0.0894066	5.7361
		Glutamine--fructose-6-phosphate aminotransferase [isomerizing] 1	GFPT1	2.5057	0.0534361	5.67925
		Tumor necrosis factor alpha-induced protein 2	TNFAIP2	2.49755	N.D.	5.64726
		AT-rich interactive domain-containing protein 2	ARID2	2.49533	0.34533	5.63857
		Nischarin	NISCH	2.49114	0.586312	5.62222
		Inositol 1,4,5-trisphosphate receptor type 1	ITPR1	2.48217	0.0842942	5.58737
		Fibronectin type III domain-containing protein 3B	FNDC3B	2.47909	0.642951	5.57546
		Homologous-pairing protein 2 homolog	PSMC3IP	2.47705	N.D.	5.56758
		Transmembrane 9 superfamily member 1	TM9SF1	2.46324	N.D.	5.51454
		Cation-independent mannose-6-phosphate receptor	IGF2R	2.45902	0.00655488	5.49843
		Fanconi anemia group D2 protein	FANCD2	2.45159	0.65739	5.47019
		Cytochrome c oxidase copper chaperone	COX17	2.44724	0.0625153	5.45372
		Extended synaptotagmin-2	ESYT2	2.43987	0.00146371	5.42593
		Liprin-beta-1	PPFIBP1	2.43142	N.D.	5.39424
		Protein Churchill	CHURC1	2.42369	N.D.	5.36542
		Tumor necrosis factor alpha-induced protein 8	TNFAIP8	2.42004	0.635823	5.35186
		Alpha-2-macroglobulin receptor-associated protein	LRPAP1	2.41639	N.D.	5.33834
		Complement factor D	CFD	2.39803	1.88648	5.27083
		DNA-binding protein SATB1	SATB1	2.39422	N.D.	5.25693
		Ephrin type-A receptor 7	EPHA7	2.39242	1.90041	5.25037
		Acyl-CoA-binding protein	DBI	2.39077	0.00649831	5.24437
		Apolipoprotein B receptor	APOBR	2.38841	0.325368	5.2358
		Non-specific lipid-transfer protein	SCP2	2.38584	0.0579969	5.22648
		Phosphoribosyltransferase domain-containing protein 1	PRTFDC1	2.37301	0.268934	5.18021
		AP-4 complex subunit epsilon-1	AP4E1	2.37152	N.D.	5.17486
		Lysosomal-trafficking regulator	LYST	2.36613	0.674707	5.15556
		Probable ATP-dependent RNA helicase DDX60-like	DDX60L	2.35742	0.697709	5.12453
		Solute carrier family 22 member 18	SLC22A18	2.34565	1.9098	5.08289
		ATP synthase mitochondrial F1 complex assembly factor 1	ATPAF1	2.33747	0.0675216	5.05416
		Insulin receptor;Insulin receptor subunit alpha;Insulin receptor subunit beta	INSR	2.33373	N.D.	5.04107
		Interferon regulatory factor 5	IRF5	2.3313	N.D.	5.03259
		Protein CIP2A	KIAA1524	2.33102	N.D.	5.03161
		Microtubule-associated protein 1A	MAP1A	2.33051	0.292056	5.02983
		Sodium-coupled neutral amino acid transporter 2	SLC38A2/SNAT2	2.3222	0.503764	5.00094
		Serine dehydratase-like	SDSL	2.31622	0.0531532	4.98026
		Endoplasmic reticulum aminopeptidase 1	ERAP1	2.31142	0.140233	4.96371
		Shootin-1	KIAA1598	2.31054	N.D.	4.96069
		Glycine amidinotransferase, mitochondrial	GATM	2.3089	N.D.	4.95505
		Protein SCAF11	SCAF11	2.30162	0.0114551	4.93011
		Serine/threonine-protein phosphatase 6 regulatory ankyrin repeat subunit B	ANKRD44	2.29139	0.387473	4.89528
		DnaJ homolog subfamily B member 12	DNAJB12	2.28971	N.D.	4.88958
		1-acyl-sn-glycerol-3-phosphate acyltransferase beta	AGPAT2	2.28712	N.D.	4.88081
		Actin-related protein 2/3 complex subunit 5-like protein	ARPC5L	2.27922	0.722267	4.85415
		Alpha-1,3-mannosyl-glycoprotein 2-beta-N-acetylglucosaminyltransferase	MGAT1	2.27912	N.D.	4.85382
		Ras-related protein Rab-27A	RAB27A	2.27153	0.0933452	4.82835
		Myocyte-specific enhancer factor 2D	MEF2D	2.26363	0.214374	4.80198
		Peptidyl-prolyl cis-trans isomerase E	PPIE	2.25804	0.0147432	4.78341
		Two pore calcium channel protein 1	TPCN1	2.25763	N.D.	4.78205
		Leucine-rich repeat and calponin homology domain-containing protein 4	LRCH4	2.25586	0.179541	4.77619
		Cyclin-dependent kinase 13	CDK13	2.25463	0.399268	4.77212
		Protein canopy homolog 2	CNPY2	2.25203	0.101873	4.76353
		Insulin receptor substrate 2	IRS2	2.25062	0.142737	4.75887
		Fanconi anemia group I protein	FANCI	2.24716	0.0403475	4.74747
		HLA class I histocompatibility antigen, B-46 alpha chain	HLA-B	2.24537	N.D.	4.74159
		Kinesin-like protein KIF15	KIF15	2.24238	0.00666095	4.73177
		Protein dopey-2	DOPEY2	2.24101	0.3356	4.72728
		DCC-interacting protein 13-alpha	APPL1	2.22743	0.107982	4.68299
		Arylsulfatase B	ARSB	2.22706	0.041394	4.68179
		DNA polymerase epsilon catalytic subunit A	POLE	2.22186	0.176543	4.66494
		Microsomal glutathione S-transferase 3	MGST3	2.22006	0.302232	4.65913
		N-acetylgalactosamine-6-sulfatase	GALNS	2.21888	0.180913	4.65532
		Podocalyxin	PODXL	2.21732	N.D.	4.65029
		Apoptotic protease-activating factor 1	APAF1	2.20844	0.135962	4.62175
		Multiple epidermal growth factor-like domains protein 8	MEGF8	2.2044	0.565042	4.60883
		Scavenger receptor class B member 1	SCARB1	2.19214	N.D.	4.56983
1		Peroxisome assembly factor 2	PEX6	2.18632	N.D.	4.55143
2		Bcl-2 homologous antagonist/killer	BAK1	2.18266	0.268736	4.5399
3		Transmembrane and coiled-coil domain-containing protein 1	TMCO1	2.1789	0.381244	4.52808
4		Peptidyl-prolyl cis-trans isomerase B	PPIB	2.17225	0.0922562	4.50726
5		Cell division cycle protein 123 homolog	CDC123	2.16788	N.D.	4.49363
6		TPR and ankyrin repeat-containing protein 1	TRANK1	2.16494	0.0176777	4.48448
7		DnaJ homolog subfamily C member 5	DNAJC5	2.15504	0.245416	4.45381
8		Rho guanine nucleotide exchange factor 18	ARHGEF18	2.15122	0.462936	4.44203
9		Vesicle transport protein SFT2B	SFT2D2	2.14693	N.D.	4.42884
10		Apoptosis regulator Bcl-2	BCL2	2.14664	0.432113	4.42795
11		Uncharacterized protein C1orf50	C1orf50	2.13876	0.307372	4.40383
12		Asparagine synthetase [glutamine-hydrolyzing]	ASNS	2.13797	0.0688368	4.40142
13		Transmembrane 9 superfamily member 4	TM9SF4	2.12886	0.16646	4.37372
14		RNA-binding protein 33	RBM33	2.12466	N.D.	4.361
15		Protein tyrosine phosphatase type IVA 1	PTP4A1	2.12343	N.D.	4.35729
16		Melanoma-associated antigen D2	MAGED2	2.12099	0.223764	4.34992
17		Transmembrane protein 41B	TMEM41B	2.11568	0.122641	4.33394
18		ATP-binding cassette sub-family D member 3	ABCD3	2.1087	0.0920087	4.31302
19		Phosphopantothenate--cysteine ligase	PPCS	2.10462	0.0704915	4.30084
20		SH3 domain-binding protein 1	SH3BP1	2.10395	0.0197	4.29885
21		Guanine nucleotide-binding protein G(I)/G(S)/G(O) subunit gamma-10	GNG10	2.10224	N.D.	4.29376
22		Probable 2-oxoglutarate dehydrogenase E1 component DHKTD1, mitochondrial	DHTKD1	2.09983	N.D.	4.28659
23		Catechol O-methyltransferase	COMT	2.09346	0.107402	4.2677
24		COBW domain-containing protein 1	CBWD1	2.0913	0.17636	4.26132
25		Endoplasmic reticulum-Golgi intermediate compartment protein 2	ERGIC2	2.08833	N.D.	4.25256
26		Sp110 nuclear body protein	SP110	2.08072	N.D.	4.23018
27		Nesprin-3	SYNE3	2.07877	N.D.	4.22447
28		Lysophosphatidylcholine acyltransferase 1	LPCAT1	2.06111	N.D.	4.17307
29		Sodium-dependent multivitamin transporter	SLC5A6	2.06105	N.D.	4.1729
30		Gamma-parvin	PARVG	2.0599	1.15041	4.16957
31		Utrophin	UTRN	2.05644	0.126728	4.15959
32		Aldose 1-epimerase	GALM	2.05611	N.D.	4.15863
33		Receptor-type tyrosine-protein phosphatase F	PTPRF	2.0514	0.301291	4.14508
34		Phosphoglycerate mutase 1	PGAM1	2.04591	0.0397465	4.12934
35		ATP-dependent 6-phosphofructokinase, muscle type	PFKM	2.04113	0.018802	4.11568
36		Autophagy protein 5	ATG5	2.03997	N.D.	4.11237
37		GTP-binding protein Rheb	RHEB	2.0368	0.030144	4.10334
38		Bifunctional UDP-N-acetylglucosamine 2-epimerase/N-acetylmannosamine kinase	GNE	2.03623	0.544161	4.10172
39		Glucose-6-phosphate translocase	SLC37A4	2.03562	N.D.	4.09999
40		ATP-dependent 6-phosphofructokinase, platelet type	PFKP	2.03188	0.115902	4.08937
41		Transport and Golgi organization protein 2 homolog	TANGO2	2.02718	N.D.	4.07607
42		Formin-binding protein 1	FNBP1	2.02708	0.13831	4.07579
43		Aldose reductase	AKR1B1	2.02689	0.0401707	4.07525
44		Ribulose-phosphate 3-epimerase	RPE	2.02601	0.0652447	4.07277
45		H(+)/Cl(-) exchange transporter 7	CLCN7	2.0228	N.D.	4.06372
46		Nucleotide exchange factor SIL1	SIL1	2.02271	0.15142	4.06346
47		Prolactin regulatory element-binding protein	PREB	2.01963	0.277023	4.0548
48		Diacylglycerol kinase zeta	DGKZ	2.01834	N.D.	4.05117
49		Enoyl-CoA hydratase/3,2-trans-enoyl-CoA isomerase	EHHADH	2.01727	0.22481	4.04817
50		Synaptojanin-1	SYNJ1	2.014	N.D.	4.03901
51		Cob(I)yrinic acid a,c-diamide adenosyltransferase, mitochondrial	MMAB	2.01024	0.562072	4.02849
52		Glycogenin-1	GYG1	2.0083	0.118836	4.02308
53		Voltage-gated potassium channel subunit beta-2	KCNAB2	2.00246	0.113957	4.00683
54		tRNA dimethylallyltransferase, mitochondrial	TRIT1	2.00245	N.D.	4.0068
55		Phosphoglycolate phosphatase	PGP	1.99956	0.351828	3.99878
56		Maspardin	SPG21	1.99524	0.390231	3.98682
57		ADP-dependent glucokinase	ADPGK	1.99332	0.176784	3.98152
58		Dol-P-Man:Man(5)GlcNAc(2)-PP-Dol alpha-1,3-mannosyltransferase	ALG3	1.99286	0.516945	3.98025
59		Beta-galactosidase	GLB1	1.98802	0.278261	3.96692
60		Pterin-4-alpha-carbinolamine dehydratase	PCBD1	1.98415	0.0885581	3.95629
61		Ras-related protein Rab-5B	RAB5B	1.98253	0.0634487	3.95185
62		Rho-related GTP-binding protein RhoC	RHOC	1.98089	0.150479	3.94737
63		Lysosome-associated membrane glycoprotein 2	LAMP2	1.9795	0.223863	3.94356
64		Peroxisomal membrane protein PMP34	SLC25A17	1.97813	0.0567807	3.93982
65		Alkyldihydroxyacetonephosphate synthase, peroxisomal	AGPS	1.97469	0.0891662	3.93044
66		Protein TFG	TFG	1.97229	0.151335	3.9239
67		Endoplasmic reticulum resident protein 29	ERP29	1.97165	0.0165675	3.92216
68		AP2-associated protein kinase 1	AAK1	1.96966	N.D.	3.91676
69		Ubiquitin carboxyl-terminal hydrolase 15	USP15	1.96888	1.27806	3.91464
70		Oxidoreductase NAD-binding domain-containing protein 1	OXNAD1	1.96549	N.D.	3.90545
71		Protein disulfide-isomerase A6	PDIA6	1.96233	0.0168786	3.89691
72		Selenoprotein K	SELK	1.96199	N.D.	3.89599
73		Mesencephalic astrocyte-derived neurotrophic factor	MANF	1.96013	0.194568	3.89097
74		Peptidyl-prolyl cis-trans isomerase F, mitochondrial	PPIF	1.95846	0.0956362	3.88647
75		TATA element modulatory factor	TMF1	1.9551	N.D.	3.87743
76		Zinc finger protein Rlf	RLF	1.9529	0.332849	3.87152
77		IgG receptor FcRn large subunit p51	FCGRT	1.94269	0.412837	3.84422
78		Calcium/calmodulin-dependent protein kinase type 1	CAMK1	1.94144	2.37497	3.84089
79		Nuclear factor of activated T-cells, cytoplasmic 2	NFATC2	1.93561	N.D.	3.8254
80		Biorientation of chromosomes in cell division protein 1-like 1	BOD1L1	1.93558	0.246674	3.82532
		HAUS augmin-like complex subunit 6	HAUS6	1.93492	N.D.	3.82357
		Endoplasmic reticulum-Golgi intermediate compartment protein 3	ERGIC3	1.93336	N.D.	3.81944
		Cofilin-2	CFL2	1.93117	N.D.	3.81364
		Epididymis-specific alpha-mannosidase	MAN2B2	1.93062	0.371309	3.81219
		CLIP-associating protein 2	CLASP2	1.92468	0.0578484	3.79653
		Persulfide dioxygenase ETHE1, mitochondrial	ETHE1	1.9234	0.00593263	3.79316
		Kinetochore-associated protein 1	KNTC1	1.92167	0.0358998	3.78861
		DnaJ homolog subfamily B member 11	DNAJB11	1.91419	0.00856306	3.76902
		Peroxisomal membrane protein PEX16	PEX16	1.91267	N.D.	3.76505
		Transcription elongation factor, mitochondrial	TEFM	1.90278	N.D.	3.73933
		Protein TMED8	TMED8	1.90061	N.D.	3.73371
		GRIP and coiled-coil domain-containing protein 2	GCC2	1.90017	0.217732	3.73257
		Nucleoside diphosphate kinase 3	NME3	1.89832	0.27307	3.72779
		Galectin-1	LGALS1	1.89773	0.0285742	3.72626
		Cytoplasmic dynein 2 heavy chain 1	DYNC2H1	1.89357	N.D.	3.71554
		Histone deacetylase 4	HDAC4	1.89077	N.D.	3.70833
		NFU1 iron-sulfur cluster scaffold homolog, mitochondrial	NFU1	1.88936	0.0752362	3.70471
		Aflatoxin B1 aldehyde reductase member 2	AKR7A2	1.88934	0.00438406	3.70466
		POU domain, class 2, transcription factor 1	POU2F1;POU2F3	1.88705	N.D.	3.69878
		Intraflagellar transport protein 25 homolog	HSPB11	1.88363	0.0931047	3.69002
		Condensin-2 complex subunit G2	NCAPG2	1.88101	0.638348	3.68333
		Charged multivesicular body protein 4b	CHMP4B	1.87911	0.702758	3.67848
		Hypoxanthine-guanine phosphoribosyltransferase	HPRT1	1.87496	0.0370595	3.66791
		Glycosylphosphatidylinositol anchor attachment 1 protein	GPAA1	1.87278	0.260378	3.66238
		GPI-anchor transamidase	PIGK	1.87168	0.0572544	3.65958
		Brain acid soluble protein 1	BASP1	1.87137	0.217959	3.6588
		Leucine-rich repeat-containing protein 20	LRRC20	1.87055	0.260944	3.65672
		Serine/threonine-protein kinase ATR	ATR	1.86652	0.0681297	3.64652
		Deoxyhypusine synthase	DHPS	1.86331	0.0467115	3.63841
		Protein RFT1 homolog	RFT1	1.85836	0.244178	3.62595
		Prolyl 4-hydroxylase subunit alpha-1	P4HA1	1.85802	0.202473	3.6251
		Serine hydroxymethyltransferase, mitochondrial	SHMT2	1.85795	0.0095813	3.62492
		LIM domain and actin-binding protein 1	LIMA1	1.8572	N.D.	3.62304
		Protein disulfide-isomerase	P4HB	1.83874	0.341158	3.57697
		7,8-dihydro-8-oxoguanine triphosphatase	NUDT1	1.83827	0.176869	3.57581
		Phosphatidylinositol glycan anchor biosynthesis class U protein	PIGU	1.83696	0.0465701	3.57256
		ADP-ribosylation factor-like protein 8B	ARL8B	1.82992	0.00854892	3.55517
		Annexin A6	ANXA6	1.82949	0.0705834	3.55411
		Phosphotriesterase-related protein	PTER	1.82911	0.252946	3.55318
		Beta-glucuronidase	GUSB	1.81628	0.00292035	3.52172
		Condensin-2 complex subunit D3	NCAPD3	1.81246	0.0603021	3.51241
		Tubulin alpha-4A chain	TUBA4A	1.80657	0.290338	3.4981
		Adenylate kinase isoenzyme 6	AK6	1.80464	0.215533	3.49342
		Nucleosome assembly protein 1-like 1	NAP1L1	1.80275	0.0939109	3.48885
		Transmembrane protein 131	TMEM131	1.80013	N.D.	3.48252
		Cation-dependent mannose-6-phosphate receptor	M6PR	1.79988	0.6705	3.48191
		Peroxisomal acyl-coenzyme A oxidase 1	ACOX1	1.79644	0.286654	3.47362
		Nck-associated protein 1-like	NCKAP1L	1.79373	0.0168786	3.4671
		NAD-dependent malic enzyme, mitochondrial	ME2	1.79152	0.133827	3.46179
		Acetyl-CoA carboxylase 1;Biotin carboxylase	ACACA	1.78906	0.00849235	3.4559
		Bromodomain adjacent to zinc finger domain protein 1A	BAZ1A	1.78717	0.147962	3.45137
		Sodium bicarbonate cotransporter 3	SLC4A7	1.78594	0.286272	3.44843
1.49254		Phosphoinositide 3-kinase adapter protein 1	PIK3AP1	1.78503	0.454182	3.44626
		Actin-related protein 2/3 complex subunit 4	ARPC4	1.78467	0.0533088	3.4454
		Dedicator of cytokinesis protein 8	DOCK8	1.78459	0.0582939	3.44521
		Peroxisomal membrane protein 11B	PEX11B	1.77996	0.00752362	3.43417
		Actin-related protein 2/3 complex subunit 3	ARPC3	1.77832	0.326089	3.43026
		Zyxin	ZYX	1.77358	0.0241618	3.41901
		Actin-related protein 2/3 complex subunit 5	ARPC5	1.77289	0.511507	3.41738
		Fumarylacetoacetate hydrolase domain-containing protein 2A	FAHD2A;FAHD2B	1.7711	0.204686	3.41314
		Lysosomal alpha-glucosidase	GAA	1.76992	0.00770039	3.41035
		Telomere-associated protein RIF1	RIF1	1.76916	0.00910046	3.40855
		T-cell immunomodulatory protein	ITFG1	1.76837	N.D.	3.40669
		Sulfhydryl oxidase 2	QSOX2	1.76544	0.383188	3.39978
		Transmembrane protein 128	TMEM128	1.76161	N.D.	3.39076
		Prenylcysteine oxidase-like	PCYOX1L	1.76005	0.0062084	3.3871
		Cytochrome P450 20A1	CYP20A1	1.75595	0.265858	3.37749
		Actin-related protein 2/3 complex subunit 2	ARPC2	1.75365	0.136153	3.37211
		GPI transamidase component PIG-S	PIGS	1.74907	0.0766857	3.36142
		Phosphatidylinositol 3-kinase regulatory subunit alpha	PIK3R1	1.74861	0.29236	3.36035
		LEM domain-containing protein 2	LEMD2	1.74495	N.D.	3.35183
		Pleckstrin homology domain-containing family O member 2	PLEKHO2	1.74474	N.D.	3.35134
		Golgi apparatus protein 1	GLG1	1.74151	0.144497	3.34385
		Protein disulfide-isomerase A4	PDIA4	1.73873	0.076014	3.33741
		Transcription initiation factor TFIID subunit 4	TAF4	1.73516	N.D.	3.32916
		Cleft lip and palate transmembrane protein 1-like protein	CLPTM1L	1.73115	0.258313	3.31992
		GPI transamidase component PIG-T	PIGT	1.72804	0.448193	3.31277
		Immediate early response 3-interacting protein 1	IER3IP1	1.72624	0.0515834	3.30864
		Ras and Rab interactor 3	RIN3	1.71966	N.D.	3.29359
		Transmembrane protein 104	TMEM104	1.71944	N.D.	3.29309
1		Selenoprotein T	SELT	1.71576	N.D.	3.2847
2		UPF0690 protein C1orf52	C1orf52	1.71545	0.328239	3.28399
3		Death-inducer obliterator 1	DIDO1	1.71418	0.396171	3.2811
4		Secretory carrier-associated membrane protein 1	SCAMP1	1.71222	0.175737	3.27665
5		Acyl-coenzyme A thioesterase 8	ACOT8	1.71109	0.208278	3.27408
6		Tyrosine-protein kinase BAZ1B	BAZ1B	1.70591	0.0714319	3.26235
7		Torsin-1A	TOR1A	1.70247	0.0304692	3.25458
8		Lysosomal protective protein	CTSA	1.70139	0.510008	3.25214
9		Ras-related protein Rab-13	RAB13	1.70027	N.D.	3.24962
10		Protein kish-A	TMEM167A	1.69949	0.725308	3.24786
11		VIP36-like protein	LMAN2L	1.69772	0.298159	3.24388
12		Polyadenylate-binding protein 4	PABPC4	1.6962	0.0221395	3.24046
13		4-trimethylaminobutyraldehyde dehydrogenase	ALDH9A1	1.6961	0.107162	3.24024
14		Ras-related protein Rab-7a	RAB7A	1.69289	0.031537	3.23304
15		EH domain-containing protein 4	EHD4	1.69046	0.275567	3.2276
16		Alpha-mannosidase 2	MAN2A1	1.68311	0.0144674	3.21119
17		Monoacylglycerol lipase ABHD12	ABHD12	1.67967	0.0447386	3.20355
18		Protein OS-9	OS9	1.6791	0.102573	3.20228
19		Retinoblastoma-like protein 1	RBL1	1.67315	N.D.	3.1891
20		PDZ and LIM domain protein 7	PDLIM7	1.67128	0.0162281	3.18497
21		Myc-associated zinc finger protein	MAZ	1.6704	N.D.	3.18303
22		Dolichyl-diphosphooligosaccharide--protein glycosyltransferase subunit STT3B	STT3B	1.6682	0.129372	3.17818
23		Stromal cell-derived factor 2-like protein 1	SDF2L1	1.66753	0.112536	3.1767
24		Transmembrane protein 41A	TMEM41A	1.66751	0.103294	3.17666
25		Lysosomal alpha-mannosidase	MAN2B1	1.666	0.44168	3.17334
26		Neutral amino acid transporter A	SLC1A4	1.65735	1.04403	3.15437
27		Deoxynucleoside triphosphate triphosphohydrolase SAMHD1	SAMHD1	1.65438	0.245472	3.14788
28		Dolichyl-diphosphooligosaccharide--protein glycosyltransferase subunit 1	RPN1	1.65193	0.207119	3.14254
29		Bridging integrator 2	BIN2	1.65123	0.201497	3.14101
30		Dedicator of cytokinesis protein 2	DOCK2	1.6487	0.307386	3.13551
31		Sideroflexin-3	SFXN3	1.64373	0.12781	3.12473
32		Type-1 angiotensin II receptor-associated protein	AGTRAP	1.63752	0.212811	3.11131
33		Sorting nexin-27	SNX27	1.63466	0.284116	3.10514
34		Sigma non-opioid intracellular receptor 1	SIGMAR1	1.63423	0.169274	3.10422
35		Putative helicase MOV-10	MOV10	1.63205	0.332489	3.09953
36		Sideroflexin-4	SFXN4	1.62635	N.D.	3.08731
37		WD repeat and FYVE domain-containing protein 3	WDFY3	1.62565	0.138565	3.08581
38		Spectrin alpha chain, non-erythrocytic 1	SPTAN1	1.62222	0.0508693	3.07848
39		DnaJ homolog subfamily C member 1	DNAJC1	1.61655	1.60594	3.06641
40		Zinc finger RNA-binding protein	ZFR	1.61067	0.374095	3.05394
41		Chromosome transmission fidelity protein 8 homolog isoform 2	CHTF8	1.61043	N.D.	3.05343
42		Lysosomal acid phosphatase	ACP2	1.60546	0.303335	3.04293
43		Protein canopy homolog 3	CNPY3	1.60539	0.328501	3.04278
44		EF-hand domain-containing protein D2	EFHD2	1.60512	0.0874762	3.04221
45		Lysine-specific demethylase 4A	KDM4A	1.6046	N.D.	3.04111
46		GDP-fucose protein O-fucosyltransferase 1	POFUT1	1.60354	0.388838	3.03888
47		Beta-hexosaminidase subunit alpha	HEXA	1.60334	0.374222	3.03846
48		Actin-related protein 3	ACTR3	1.60284	0.112918	3.03741
49		Cysteine protease ATG4B	ATG4B	1.601	2.46473	3.03354
50		E3 ubiquitin-protein ligase UHRF1	UHRF1	1.59843	0.119628	3.02814
51		Nuclear envelope pore membrane protein POM 121C	POM121C;POM121	1.59746	1.32715	3.0261
52		Serine/threonine-protein kinase 10	STK10	1.59334	0.0378868	3.01747
53		Secretory carrier-associated membrane protein 2	SCAMP2	1.58833	0.365277	3.00701
54		Bleomycin hydrolase	BLMH	1.58778	0.0615112	3.00586
55		Minor histocompatibility protein HA-1;Minor histocompatibility antigen HA-1	HMHA1	1.58069	0.178834	2.99113
56		Translation machinery-associated protein 7	TMA7	1.57217	0.0514279	2.97352
57		Neurolysin, mitochondrial	NLN	1.57072	0.00444063	2.97053
58		Nuclear fragile X mental retardation-interacting protein 2	NUFIP2	1.57043	N.D.	2.96993
59		Stromal cell-derived factor 2	SDF2	1.56096	0.0779444	2.9505
60		Acetyl-coenzyme A transporter 1	SLC33A1	1.55819	N.D.	2.94484
61		Granulins;Acrogranin	GRN	1.55798	0.0267993	2.94441
62		Proteasome subunit beta type-8	PSMB8	1.55797	0.0462165	2.94439
63		LETM1 domain-containing protein 1	LETMD1	1.55617	N.D.	2.94072
64		Condensin complex subunit 2	NCAPH	1.5552	0.493249	2.93874
65		Probable 18S rRNA (guanine-N(7))-methyltransferase	WBSCR22	1.55487	0.141542	2.93807
66		Cathepsin S	CTSS	1.55429	0.0623032	2.93689
67		Myosin light polypeptide 6	MYL6	1.55143	0.0924118	2.93108
68		Mitotic checkpoint serine/threonine-protein kinase BUB1 beta	BUB1B	1.55016	N.D.	2.9285
69		Long-chain-fatty-acid--CoA ligase 1	ACSL1	1.54945	0.0842093	2.92706
70		Phosphatidylinositide phosphatase SAC1	SACM1L	1.54839	0.0724289	2.92491
71		Niemann-Pick C1 protein	NPC1	1.54464	0.0613557	2.91731
72		Vesicle transport through interaction with t-SNAREs homolog 1A	VTI1A	1.54091	0.160344	2.90978
73		Synaptogyrin-1	SYNGR1	1.5359	0.187228	2.89969
74		Thioredoxin-dependent peroxide reductase, mitochondrial	PRDX3	1.53329	0.20178	2.89445
75		C-myc promoter-binding protein	DENND4A	1.53262	0.459457	2.89311
76		Bloom syndrome protein	BLM	1.5306	N.D.	2.88906
77		Vesicle transport protein SFT2A	SFT2D1	1.52878	0.000212132	2.88542
78		Aldehyde dehydrogenase X, mitochondrial	ALDH1B1	1.52773	0.141732	2.88332
79		Histone H2A type 2-B	HIST2H2AB	1.52522	1.05321	2.87831
80		Ribosome-releasing factor 2, mitochondrial	GFM2	1.5227	0.177364	2.87328
		Copper transport protein ATOX1	ATOX1	1.52123	0.032732	2.87036
		Ras-related protein Rab-5A	RAB5A	1.52056	0.139915	2.86902
		KIF1-binding protein	KIAA1279	1.51771	0.218489	2.86336
		Antigen peptide transporter 2	TAP2	1.51713	0.601854	2.86221
		Metalloproteinase inhibitor 1	TIMP1	1.51679	N.D.	2.86154
		Hypoxia-inducible factor 1-alpha inhibitor	HIF1AN	1.514	N.D.	2.85601
		High mobility group protein B3	HMGB3	1.51317	0.198237	2.85437
		Calponin-2	CNN2	1.51269	0.0562857	2.85342
		Peroxisomal biogenesis factor 19	PEX19	1.5096	N.D.	2.84731
		Protein FAM3C	FAM3C	1.50927	0.296299	2.84666
		Presenilins-associated rhomboid-like protein, mitochondrial;P-beta	PARL	1.50857	0.202367	2.84528
		Small ubiquitin-related modifier 1	SUMO1	1.5056	0.143444	2.83943
		Phospholipase D1	PLD1	1.50126	N.D.	2.8309
		Osteoclast-stimulating factor 1	OSTF1	1.50087	0.0253922	2.83013
		Protein timeless homolog	TIMELESS	1.49914	0.137561	2.82674
		Isoamyl acetate-hydrolyzing esterase 1 homolog	IAH1	1.49823	0.414704	2.82496
		MIP18 family protein FAM96A	FAM96A	1.4965	0.192071	2.82157
		Eukaryotic translation initiation factor 4 gamma 2	EIF4G2	1.49542	0.0432184	2.81946
		GTP-binding protein SAR1a	SAR1A	1.48897	0.11185	2.80689
		3-ketoacyl-CoA thiolase, peroxisomal	ACAA1	1.48752	0.321571	2.80407
		Calreticulin	CALR	1.48503	0.0323643	2.79923
		3-phosphoinositide-dependent protein kinase 1	PDPK1;PDPK2P	1.4802	0.0831982	2.78987
		A-kinase anchor protein 1, mitochondrial	AKAP1	1.47926	0.18628	2.78806
		Protein transport protein Sec61 subunit beta	SEC61B	1.47881	0.164353	2.78719
		Protein CREG1	CREG1	1.47709	0.196059	2.78387
		Zinc transporter 5	SLC30A5	1.47665	N.D.	2.78302
		Hematopoietic lineage cell-specific protein	HCLS1	1.47308	0.609469	2.77614
		UDP-glucose:glycoprotein glucosyltransferase 1	UGGT1	1.47026	0.0372433	2.77072
		Microtubule-associated protein RP/EB family member 1	MAPRE1	1.47008	0.0281428	2.77037
		Procollagen-lysine,2-oxoglutarate 5-dioxygenase 3	PLOD3	1.46908	0.186528	2.76845
		Neurogranin;NEUG(55-78)	NRGN	1.46855	N.D.	2.76744
		U8 snoRNA-decapping enzyme	NUDT16	1.46544	0.102318	2.76148
		Gamma-aminobutyric acid receptor-associated protein	GABARAP	1.46236	0.109213	2.75559
		Immunity-related GTPase family Q protein	IRGQ	1.45909	0.236358	2.74935
		Attractin	ATRN	1.45663	N.D.	2.74466
		Caspase recruitment domain-containing protein 16	CARD16	1.45187	N.D.	2.73562
		Ceramide synthase 6	CERS6	1.45109	N.D.	2.73415
		Translationally-controlled tumor protein	TPT1	1.45032	0.142737	2.73269
		Unconventional myosin-XVIIIa	MYO18A	1.45017	0.18901	2.7324
		Elongation factor 1-alpha 2	EEF1A2	1.44679	N.D.	2.72601
		DnaJ homolog subfamily C member 13	DNAJC13	1.44397	0.000586899	2.72069
		Volume-regulated anion channel subunit LRRC8D	LRRC8D	1.44334	0.808121	2.7195
		Histidine triad nucleotide-binding protein 2, mitochondrial	HINT2	1.44325	0.0342805	2.71933
		Thioredoxin-related transmembrane protein 1	TMX1	1.43945	0.0479418	2.71217
		Calnexin	CANX	1.4366	0.133035	2.70682
		CD97 antigen	CD97	1.43451	0.467765	2.7029
		HLA class I histocompatibility antigen, Cw-7 alpha chain	HLA-C	1.43019	0.390931	2.69482
		Mitochondrial import receptor subunit TOM5 homolog	TOMM5	1.42854	0.0996526	2.69174
		UDP-glucose:glycoprotein glucosyltransferase 2	UGGT2	1.42742	N.D.	2.68965
		Guanidinoacetate N-methyltransferase	GAMT	1.42704	0.211616	2.68894
		Glucose-6-phosphate 1-dehydrogenase	G6PD	1.42293	0.102919	2.6813
		PH and SEC7 domain-containing protein 4	PSD4	1.42292	0.0765797	2.68128
		Rho GTPase-activating protein 4	ARHGAP4	1.42168	0.0771524	2.67897
		Rapamycin-insensitive companion of mTOR	RICTOR	1.42162	N.D.	2.67886
		Cytospin-A	SPECC1L	1.42078	N.D.	2.6773
		Acyl-CoA dehydrogenase family member 9, mitochondrial	ACAD9	1.41958	0.0610657	2.67508
		Sentrin-specific protease 3	SENP3	1.41293	N.D.	2.66277
		Dihydrofolate reductase	DHFR	1.40918	0.102007	2.65586
		Recombining binding protein suppressor of hairless	RBPJ	1.40868	0.186245	2.65494
		Ubiquitin carboxyl-terminal hydrolase 4	USP4	1.39681	0.127046	2.63319
		PRA1 family protein 3	ARL6IP5	1.39553	0.00818123	2.63085
		Myosin light chain 6B	MYL6B	1.39529	0.413629	2.63041
		Ataxin-10	ATXN10	1.39345	0.140446	2.62706
		Structural maintenance of chromosomes protein 4	SMC4	1.39331	0.0674014	2.62681
		V-type proton ATPase subunit S1	ATP6AP1	1.39266	N.D.	2.62562
		Pyruvate dehydrogenase phosphatase regulatory subunit, mitochondrial	PDPR	1.3922	0.0680307	2.62479
		RNA-binding protein 27	RBM27	1.39167	1.0863	2.62382
		NADH-cytochrome b5 reductase 3	CYB5R3	1.3913	0.00532451	2.62315
		Histone acetyltransferase type B catalytic subunit	HAT1	1.38855	0.0272307	2.61815
		UDP-N-acetylhexosamine pyrophosphorylase-like protein 1	UAP1L1	1.38614	N.D.	2.61378
		Ras-related protein Rab-33A	RAB33A	1.38588	N.D.	2.61331
		UPF0553 protein C9orf64	C9orf64	1.38511	N.D.	2.61192
		Calcium-binding mitochondrial carrier protein SCaMC-1	SLC25A24	1.3847	0.0498227	2.61118
		Serine/threonine-protein kinase WNK1	WNK1	1.38396	0.506267	2.60984
		Protein VPRBP	VPRBP	1.38193	0.177979	2.60617
		Ganglioside GM2 activator;Ganglioside GM2 activator isoform short	GM2A	1.38007	0.0228608	2.60281
		Glutamine-rich protein 1	QRICH1	1.37882	N.D.	2.60056
		NAD(P)H-hydrate epimerase	APOA1BP	1.37702	0.0840891	2.59731
		Zinc finger E-box-binding homeobox 2	ZEB2	1.37649	N.D.	2.59636
		Glycerol-3-phosphate dehydrogenase, mitochondrial	GPD2	1.37608	0.177194	2.59562
1		Retinoblastoma-associated protein	RB1	1.37319	0.153859	2.59043
2		Nicastrin	NCSTN	1.373	0.144504	2.59009
3		DNA repair protein RAD51 homolog 3	RAD51C	1.37224	N.D.	2.58872
4		Eukaryotic translation initiation factor 4 gamma 3	EIF4G3	1.37203	0.607714	2.58835
5		tRNA (guanine(10)-N2)-methyltransferase homolog	TRMT11	1.36758	N.D.	2.58037
6		Phosphatidylinositol 4,5-bisphosphate 3-kinase catalytic subunit beta isoform	PIK3CB	1.36213	0.179428	2.57064
7		Volume-regulated anion channel subunit LRRC8C	LRRC8C	1.35947	0.313284	2.56591
8		Retinal rod rhodopsin-sensitive cGMP 3,5-cyclic phosphodiesterase subunit delta	PDE6D	1.35902	N.D.	2.56511
9		Ras-related protein Rab-8B	RAB8B	1.35757	0.0689288	2.56253
10		Nuclear respiratory factor 1	NRF1	1.35675	N.D.	2.56108
11		Coiled-coil domain-containing protein 58	CCDC58	1.35563	0.00920653	2.55909
12		N-acetylgalactosaminyltransferase 7	GALNT7	1.35447	N.D.	2.55703
13		Serine racemase	SRR	1.35368	N.D.	2.55563
14		Ras-related protein Rab-18	RAB18	1.35341	0.0423628	2.55515
15		Integrin-linked protein kinase	ILK	1.3498	0.352889	2.54877
16		Syntaxin-16	STX16	1.34956	N.D.	2.54834
17		Delta(24)-sterol reductase	DHCR24	1.34845	0.259791	2.54638
18		Probable C-mannosyltransferase DPY19L1	DPY19L1	1.34807	N.D.	2.54571
19		WD repeat-containing protein 62	WDR62	1.3471	N.D.	2.544
20		Hippocalcin-like protein 1;Neuron-specific calcium-binding protein hippocalcin	HPCAL1;HPCA	1.34164	0.125985	2.53439
21		Rho GTPase-activating protein 1	ARHGAP1	1.34052	0.0228678	2.53243
22		Monocarboxylate transporter 2	SLC16A7/MCT2	1.33979	N.D.	2.53114
23		Cleft lip and palate transmembrane protein 1	CLPTM1	1.33825	0.0392374	2.52844
24		Mitochondrial import inner membrane translocase subunit TIM16	PAM16	1.33096	0.00645588	2.5157
25		Centrosomal protein of 170 kDa	CEP170	1.33082	0.0892369	2.51546
26		Protein FAM136A	FAM136A	1.33054	0.159141	2.51497
27		5-demethoxyubiquinone hydroxylase, mitochondrial	COQ7	1.32933	N.D.	2.51286
28		Thymidylate synthase	TYMS	1.32693	N.D.	2.50868
29		Actin-related protein 2/3 complex subunit 1B	ARPC1B	1.32557	0.221834	2.50632
30		CLIP-associating protein 1	CLASP1	1.32417	0.114728	2.50389
31		Thioredoxin domain-containing protein 12	TXNDC12	1.32391	0.28828	2.50344
32		Thiamin pyrophosphokinase 1	TPK1	1.32086	N.D.	2.49815
33		Copine-8;Copine-9;Copine-5	CPNE8;CPNE9;CPNE5	1.3198	N.D.	2.49632
34		Mitochondrial import receptor subunit TOM22 homolog	TOMM22	1.31844	0.106632	2.49396
35		Drebrin-like protein	DBNL	1.31803	0.144674	2.49325
36		Lariat debranching enzyme	DBR1	1.31622	0.0649407	2.49013
37		Nuclease EXOG, mitochondrial	EXOG	1.31568	0.186485	2.4892
38		F-box only protein 22	FBXO22	1.31362	N.D.	2.48564
39		Uncharacterized protein KIAA1143	KIAA1143	1.3112	N.D.	2.48148
40		Bifunctional epoxide hydrolase 2	EPHX2	1.31084	N.D.	2.48086
41		Neurofibromin;Neurofibromin truncated	NF1	1.30692	0.202834	2.47413
42		Structural maintenance of chromosomes protein 2	SMC2	1.30659	0.118935	2.47356
43		Probable dolichyl pyrophosphate Glc1Man9GlcNAc2 alpha-1,3-glucosyltransferase	ALG8	1.30606	0.0557978	2.47265
44		Arf-GAP with coiled-coil, ANK repeat and PH domain-containing protein 2	ACAP2	1.30569	0.158243	2.47202
45		Succinyl-CoA:3-ketoacid coenzyme A transferase 1, mitochondrial	OXCT1	1.3054	0.201681	2.47152
46		THUMP domain-containing protein 3	THUMPD3	1.30282	0.220009	2.46711
47		78 kDa glucose-regulated protein	HSPA5	1.3017	0.0709582	2.46519
48		Ena/VASP-like protein	EVL	1.30014	0.00990657	2.46253
49		Nuclear pore complex protein Nup214	NUP214	1.29891	0.209445	2.46043
50		HIV Tat-specific factor 1	HTATSF1	1.29784	0.0590646	2.45861
51		SUN domain-containing protein 2	SUN2	1.29677	N.D.	2.45678
52		Dihydroxyacetone phosphate acyltransferase	GNPAT	1.29577	0.169267	2.45508
53		Golgin subfamily B member 1	GOLGB1	1.2931	0.0484227	2.45054
54		WD repeat-containing protein 70	WDR70	1.2926	N.D.	2.44969
55		GTP-binding protein SAR1b	SAR1B	1.29221	0.0948513	2.44903
56		Sterol O-acyltransferase 1	SOAT1	1.2916	N.D.	2.44799
57		Plexin-B2	PLXNB2	1.28967	0.145777	2.44472
58		Deoxyuridine 5-triphosphate nucleotidohydrolase, mitochondrial	DUT	1.2882	0.0952473	2.44223
59		RNA-binding protein 26	RBM26	1.28784	0.0406445	2.44162
60		Phostensin	PPP1R18	1.28504	N.D.	2.43689
61		Mitochondrial import inner membrane translocase subunit TIM14	DNAJC19	1.28288	0.0232567	2.43324
62		Forkhead box protein K1	FOXK1	1.28281	0.171396	2.43312
63		Adenylate kinase isoenzyme 1	AK1	1.27906	0.0529269	2.42681
64		Nucleoside diphosphate kinase 6	NME6	1.27853	0.236626	2.42592
65		Pterin-4-alpha-carbinolamine dehydratase 2	PCBD2	1.27745	0.0940169	2.4241
66		Nuclear autoantigenic sperm protein	NASP	1.27715	0.206221	2.4236
67		Eukaryotic translation initiation factor 2A	EIF2A	1.27362	0.0341391	2.41767
68		CAP-Gly domain-containing linker protein 1	CLIP1	1.27249	0.241682	2.41578
69		Lysosome-associated membrane glycoprotein 1	LAMP1	1.27234	0.229039	2.41553
70		Vacuolar ATPase assembly integral membrane protein VMA21	VMA21	1.26596	0.0719835	2.40487
71		5-formyltetrahydrofolate cyclo-ligase	MTHFS	1.26566	0.298031	2.40437
72		Phospholipid hydroperoxide glutathione peroxidase, mitochondrial	GPX4	1.26541	0.209961	2.40396
73		Erlin-1	ERLIN1	1.26507	0.593024	2.40339
74		BAG family molecular chaperone regulator 1	BAG1	1.26422	N.D.	2.40197
75		Stromal membrane-associated protein 2	SMAP2	1.26358	0.820487	2.40091
76		Coiled-coil domain-containing protein 51	CCDC51	1.26108	N.D.	2.39675
77		Magnesium transporter protein 1	MAGT1	1.25964	0.0200465	2.39436
78		Lysine-specific demethylase 3B	KDM3B	1.2563	0.0459337	2.38882
79		Growth hormone-inducible transmembrane protein	GHITM	1.25422	0.23925	2.38538
80		FYVE and coiled-coil domain-containing protein 1	FYCO1	1.25402	0.480343	2.38505
		Guanine nucleotide-binding protein subunit beta-4	GNB4	1.25343	0.340924	2.38408
		Williams-Beuren syndrome chromosomal region 16 protein	WBSCR16	1.25125	N.D.	2.38048
		Ras-related protein Rab-22A	RAB22A	1.25076	0.605247	2.37967
		Probable serine carboxypeptidase CPVL	CPVL	1.24918	0.350407	2.37706
		Endoplasmic reticulum resident protein 44	ERP44	1.24855	0.0679317	2.37602
		Chromobox protein homolog 5	CBX5	1.24773	0.232787	2.37467
		Ubiquitin-like-conjugating enzyme ATG3	ATG3	1.24419	0.0943917	2.36886
		Secretory carrier-associated membrane protein 3	SCAMP3	1.24328	0.033531	2.36736
		10 kDa heat shock protein, mitochondrial	HSPE1	1.24215	0.0267852	2.36551
		Enhancer of mRNA-decapping protein 4	EDC4	1.23802	0.314882	2.35875
		Phosphatidylinositol 3,4,5-trisphosphate 5-phosphatase 2	INPPL1	1.2333	0.111178	2.35104
		Motile sperm domain-containing protein 2	MOSPD2	1.23283	N.D.	2.35028
		PAS domain-containing serine/threonine-protein kinase	PASK	1.23255	N.D.	2.34982
		Adenosylhomocysteinase	AHCY	1.22984	0.196236	2.34541
		Signal transducer and activator of transcription 2	STAT2	1.22732	0.756279	2.34132
		Cullin-2	CUL2	1.22343	0.0535068	2.33501
		G patch domain-containing protein 1	GPATCH1	1.22317	0.147792	2.33459
		Dual specificity protein phosphatase 3	DUSP3	1.22127	0.315196	2.33152
		Adenosine deaminase	ADA	1.22092	0.880578	2.33095
		TBC1 domain family member 13	TBC1D13	1.21786	0.303709	2.32601
		Mitochondrial import receptor subunit TOM20 homolog	TOMM20	1.21762	N.D.	2.32563
		Cathepsin L1;Cathepsin L1 heavy chain;Cathepsin L1 light chain	CTSL	1.21583	0.069346	2.32274
		Protein PRRC1	PRRC1	1.21285	0.405703	2.31795
		Sulfatase-modifying factor 2	SUMF2	1.21277	0.0247205	2.31782
		NAD(P) transhydrogenase, mitochondrial	NNT	1.21131	0.0669772	2.31548
		PERQ amino acid-rich with GYF domain-containing protein 2	GIGYF2	1.21036	0.224287	2.31395
		Ubiquitin-associated protein 2	UBAP2	1.20842	0.542889	2.31084
		BRI3-binding protein	BRI3BP	1.20387	0.258037	2.30357
		Pyridoxal-dependent decarboxylase domain-containing protein 1	PDXDC1	1.20312	0.227625	2.30237
		Kinetochore protein Spc24	SPC24	1.20146	0.172782	2.29972
		ADP-ribosylation factor GTPase-activating protein 3	ARFGAP3	1.20066	N.D.	2.29845
		Glutathione S-transferase Mu 3	GSTM3	1.19909	0.0729734	2.29595
		Heat shock 70 kDa protein 14	HSPA14	1.19908	0.168921	2.29593
		GDP-fucose protein O-fucosyltransferase 2	POFUT2	1.19884	N.D.	2.29555
		Dihydropyrimidinase-related protein 2	DPYSL2	1.19823	0.207918	2.29458
		Ras-related protein Rab-43	RAB43	1.19788	N.D.	2.29402
		Tyrosine-protein phosphatase non-receptor type 6	PTPN6	1.19768	0.0086762	2.29371
		Nucleolar MIF4G domain-containing protein 1	NOM1	1.19553	0.102467	2.29029
		Condensin complex subunit 3	NCAPG	1.19365	0.163122	2.28731
		Protein YIPF5	YIPF5	1.18992	N.D.	2.2814
		Mitochondrial import inner membrane translocase subunit Tim17-B	TIMM17B	1.18688	0.21245	2.2766
		E3 ubiquitin-protein ligase UHRF2	UHRF2	1.18672	N.D.	2.27635
		Transmembrane protein 33	TMEM33	1.18507	0.0600899	2.27374
		Filamin-C	FLNC	1.18265	N.D.	2.26993
[truncated: 631 more rows]

## Sheet: Significant_Downregulatedprotei
		DOWNREGULATED PROTEINS IN KU812 ImaR VS. KU812 P
[truncated: 1,431 more rows]
